# Supplementary material for: Orchid Species Richness along Elevational and Environmental Gradients in Yunnan, China
Source: PubMed Central journal article supplement (PMC4640717; doi:10.1371/journal.pone.0142621), 2015-11-10
Supplement: pone.0142621.s001.pdf [file pone.0142621.s001.pdf]

## Supporting Information

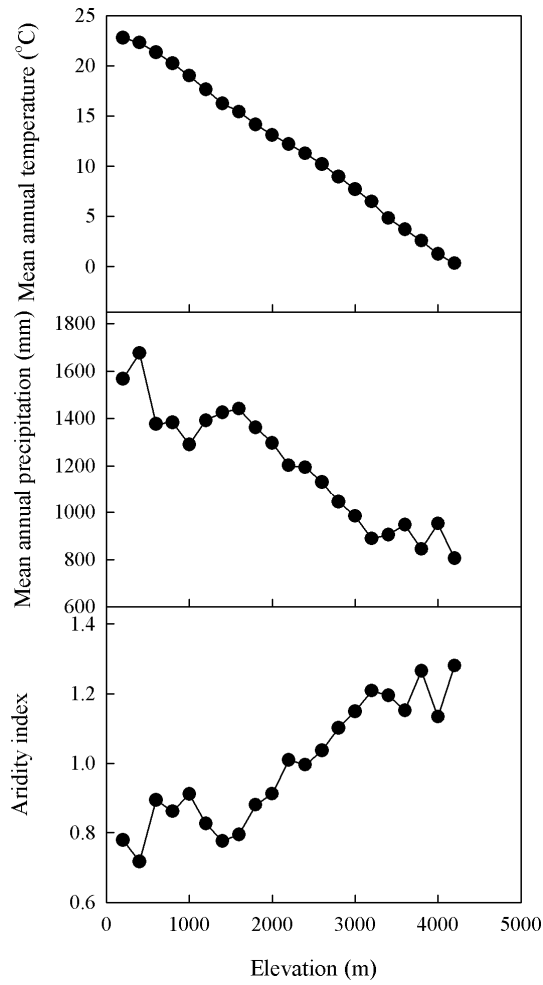

**Figure A. Variations in mean annual temperature, mean annual precipitation, and aridity index with elevation in Yunnan Province, China.**

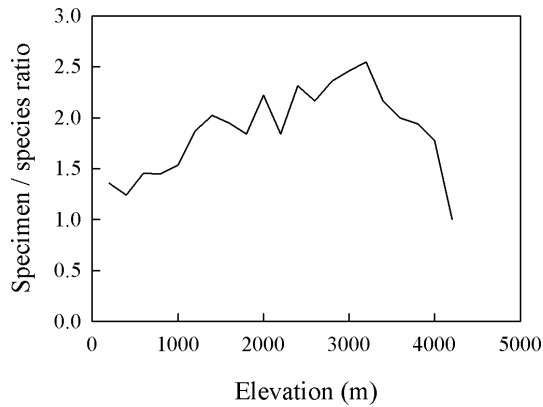

**Figure B. Sampling density for different elevational intervals.**

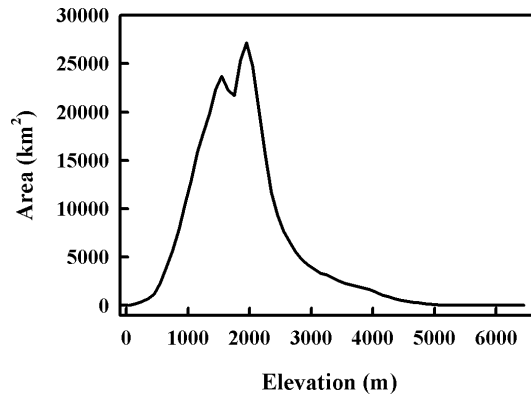

**Figure C. Land areas for different elevational intervals.**

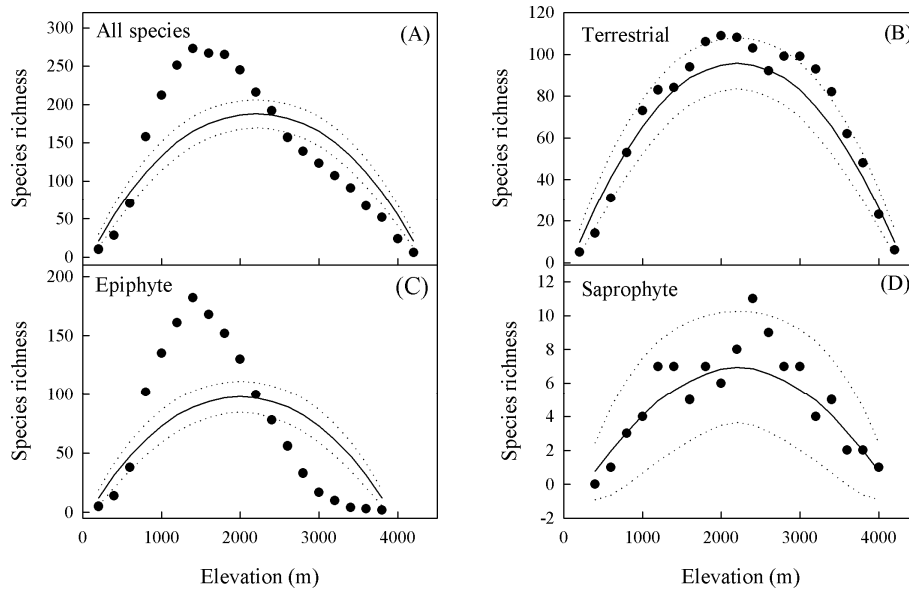

**Figure D. Elevation-related patterns of richness for all orchid species (A), and terrestrial (B), epiphyte (C), and saprophyte (D) forms in Yunnan, China.** Solid dots and solid lines represent observed and predicted species richness, respectively. Dashed lines show 95% confidence intervals predicted by MDE randomization model.

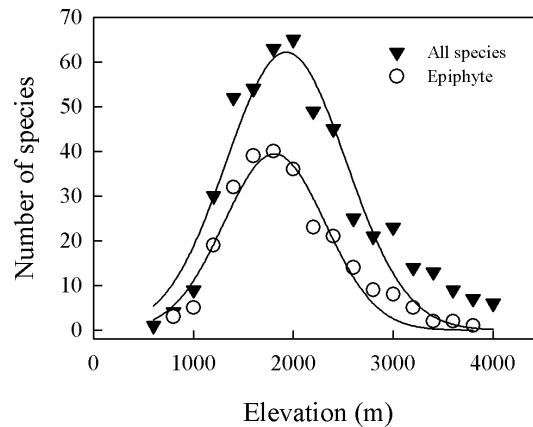

**Figure E. Elevational gradients for orchid species richness in the Gaoligong Mountains, Yunnan.**

**Table A. Important genera within the Orchidaceae family in Yunnan Province, China.**

| Genus               | Number of species | Genus                | Number of species |
|---------------------|-------------------|----------------------|-------------------|
| <i>Dendrobium</i>   | 56                | <i>Oberonia</i>      | 16                |
| <i>Bulbophyllum</i> | 42                | <i>Peristylus</i>    | 16                |
| <i>Habenaria</i>    | 31                | <i>Goodyera</i>      | 14                |
| <i>Liparis</i>      | 30                | <i>Anoectochilus</i> | 12                |
| <i>Calanthe</i>     | 27                | <i>Cleisostoma</i>   | 10                |
| <i>Eria</i>         | 25                | <i>Malaxis</i>       | 10                |
| <i>Cymbidium</i>    | 23                | <i>Orchis</i>        | 10                |
| <i>Platanthera</i>  | 21                | <i>Paphiopedilum</i> | 10                |
| <i>Coelogyne</i>    | 18                | <i>Pholidota</i>     | 10                |
| <i>Cypripedium</i>  | 16                | <i>Pleione</i>       | 10                |
| <i>Herminium</i>    | 16                |                      |                   |

**Table B. Estimated parameters of linear regression models used to explore the relationships among species richness and density, elevation, and other environmental variables.** Each midpoint indicates where the value of response was maximum. Aridity index was calculated as potential evapotranspiration rate divided by mean annual precipitation.

| Independent variable         | Response variable                 | Confidence interval (95%) for independent variable (midpoint value) | Related figure |
|------------------------------|-----------------------------------|---------------------------------------------------------------------|----------------|
|                              | Specimen richness                 | 1535–1865 (1700)                                                    | 3A             |
|                              | Genus richness                    | 1395–1723 (1559)                                                    | 3A             |
|                              | Species richness                  | 1418–1762 (1590)                                                    | 3A             |
| Elevation (m)                | Species richness for epiphytes    | 1367–1563 (1465)                                                    | 3B             |
|                              | Species richness for terrestrials | 2052–2598 (2325)                                                    | 3B             |
|                              | Species richness for saprophytes  | 2307–2663 (2485)                                                    | 3B             |
|                              | Specimen density                  | 1528–2028 (1778)                                                    | 3C             |
|                              | Genus density                     | 1411–1769 (1590)                                                    | 3C             |
|                              | Species density                   | 1414–1798 (1606)                                                    | 3C             |
|                              | Species density for epiphytes     | 1344–1556 (1450)                                                    | 3D             |
|                              | Species density for terrestrials  | 2059–2527 (2293)                                                    | 3D             |
|                              | Species density for saprophytes   | 2341–2777 (2559)                                                    | 3D             |
|                              | Specimen richness                 | 12.8–17.0 (14.9)                                                    | 6A             |
|                              | Genus richness                    | 13.1–18.1 (15.6)                                                    | 6A             |
|                              | Species richness                  | 13.7–17.7 (15.7)                                                    | 6A             |
| Mean annual temperature (°C) | Species richness for epiphytes    | 15.0–17.4 (16.2)                                                    | 6B             |
|                              | Species richness for terrestrials | 10.1–13.3 (11.7)                                                    | 6B             |
|                              | Species richness for saprophytes  | 9.9–12.9 (11.4)                                                     | 6B             |
|                              | Specimen density                  | 12.3–16.7 (14.5)                                                    | 6C             |
|                              | Genus density                     | 13.1–17.9 (15.5)                                                    | 6C             |

|               |                                   |                  |    |
|---------------|-----------------------------------|------------------|----|
|               | Species density                   | 13.5–18.1 (15.6) | 6C |
|               | Species density for epiphytes     | 15.0–17.5 (16.2) | 6D |
|               | Species density for terrestrials  | 9.9–12.1 (11.0)  | 6D |
|               | Species density for saprophytes   | 9.7–12.1 (10.9)  | 6D |
|               | Specimen richness                 | 1207–1397 (1302) | 8A |
|               | Genus richness                    | 1216–1414 (1315) | 8A |
|               | Species richness                  | 1237–1414 (1326) | 8A |
| Mean annual   | Species richness for epiphytes    | 1309–1411 (1360) | 8B |
| precipitation | Species richness for terrestrials | 1099–1259 (1179) | 8B |
| (mm)          | Species richness for saprophytes  | 1094–1244 (1169) | 8B |
|               | Specimen density                  | 1179–1377 (1278) | 8C |
|               | Genus density                     | 1191–1417 (1304) | 8C |
|               | Species density                   | 1232–1426 (1329) | 8C |
|               | Species density for epiphytes     | 1307–1405 (1356) | 8D |
|               | Species density for terrestrials  | 1078–1234 (1156) | 8D |
|               | Species density for saprophytes   | 1065–1225 (1145) | 8D |
| Aridity       | Specimen richness                 | 0.87–0.99 (0.93) | 9A |
| index         | Genus richness                    | 0.86–1.00 (0.93) | 9A |
|               | Species richness                  | 0.86–0.98 (0.92) | 9A |
|               | Species richness for epiphytes    | 0.83–0.91 (0.87) | 9B |
|               | Species richness for terrestrials | 0.94–1.06 (1.00) | 9B |
|               | Species richness for saprophytes  | 0.95–1.07 (1.01) | 9B |
|               | Specimen density                  | 0.86–1.00 (0.94) | 9C |
|               | Genus density                     | 0.88–0.98 (0.93) | 9C |
|               | Species density                   | 0.86–0.98 (0.92) | 9C |
|               | Species density for epiphytes     | 0.83–0.89 (0.86) | 9D |
|               | Species density for terrestrials  | 0.95–1.09 (1.02) | 9D |
|               | Species density for saprophytes   | 0.97–1.09 (1.03) | 9D |

**Table C. Site of collection, elevation, habitat, life form, and environmental variables associated with each studied specimen.**

| Species                           | Site     | Elevation | Mean annual temperature | Mean annual precipitation | Relative humidity | Potential Evapotranspiration | Aridity index | Life form   | Habitat       | Endemism    |
|-----------------------------------|----------|-----------|-------------------------|---------------------------|-------------------|------------------------------|---------------|-------------|---------------|-------------|
| <i>Acampe multiflora</i>          | Pingbian | 320       | 22.90                   | 1648.57                   | 86.34             | 990.16                       | 0.60          | Epiphyte    | Sparse forest | Non-endemic |
| <i>Acampe multiflora</i>          | Puer     | 1010      | 20.20                   | 1429.78                   | 79.51             | 1123.79                      | 0.79          | Epiphyte    | Open site     | Non-endemic |
| <i>Acampe multiflora</i>          | Lijiang  | 2020      | 14.95                   | 982.53                    | 63.24             | 1077.65                      | 1.10          | Epiphyte    | Sparse forest | Non-endemic |
| <i>Acampe ochracea</i>            | Menghai  | 1100      | 18.96                   | 1314.38                   | 80.83             | 1150.91                      | 0.88          | Epiphyte    | Dense forest  | Non-endemic |
| <i>Acampe rigida</i>              | Mengla   | 650       | 21.30                   | 1514.70                   | 84.25             | 1146.68                      | 0.76          | Epiphyte    | Dense forest  | Non-endemic |
| <i>Acampe rigida</i>              | Luoping  | 800       | 19.24                   | 1686.24                   | 82.51             | 1040.03                      | 0.62          | Epiphyte    | Forest edge   | Non-endemic |
| <i>Acampe rigida</i>              | Jinghong | 900       | 20.32                   | 1161.08                   | 80.46             | 1256.19                      | 1.08          | Epiphyte    | Shrubland     | Non-endemic |
| <i>Acampe rigida</i>              | Lushui   | 1000      | 20.05                   | 1195.57                   | 70.63             | 911.65                       | 0.76          | Epiphyte    | Dense forest  | Non-endemic |
| <i>Acampe rigida</i>              | Menghai  | 1000      | 19.56                   | 1314.38                   | 80.83             | 1150.91                      | 0.88          | Epiphyte    | Dense forest  | Non-endemic |
| <i>Acampe rigida</i>              | Jinghong | 1100      | 19.12                   | 1161.08                   | 80.46             | 1256.19                      | 1.08          | Epiphyte    | Dense forest  | Non-endemic |
| <i>Acampe rigida</i>              | Jingdong | 1100      | 18.98                   | 1128.40                   | 76.80             | 1142.11                      | 1.01          | Epiphyte    | Dense forest  | Non-endemic |
| <i>Acampe rigida</i>              | Jinghong | 1100      | 19.12                   | 1161.08                   | 80.46             | 1256.19                      | 1.08          | Epiphyte    | Forest edge   | Non-endemic |
| <i>Acampe rigida</i>              | Zhenyuan | 1200      | 19.04                   | 1254.48                   | 77.40             | 1138.06                      | 0.91          | Epiphyte    | Dense forest  | Non-endemic |
| <i>Acanthephippium striatum</i>   | Pingbian | 910       | 19.36                   | 1648.57                   | 86.34             | 990.16                       | 0.60          | Terrestrial | Dense forest  | Non-endemic |
| <i>Acanthephippium sylhetense</i> | Jinghong | 540       | 22.48                   | 1161.08                   | 80.46             | 1256.19                      | 1.08          | Epiphyte    | Dense forest  | Non-endemic |
| <i>Aerides falcata</i>            | Jinping  | 800       | 20.69                   | 2305.17                   | 83.81             | 1030.46                      | 0.45          | Epiphyte    | Dense forest  | Non-endemic |
| <i>Aerides flabellata</i>         | Menghai  | 1080      | 19.08                   | 1314.38                   | 80.83             | 1150.91                      | 0.88          | Epiphyte    | Forest edge   | Non-endemic |
| <i>Aerides rosea</i>              | Menghai  | 1080      | 19.08                   | 1314.38                   | 80.83             | 1150.91                      | 0.88          | Epiphyte    | Dense forest  | Non-endemic |
| <i>Aerides rosea</i>              | Menghai  | 1100      | 18.96                   | 1314.38                   | 80.83             | 1150.91                      | 0.88          | Epiphyte    | Dense forest  | Non-endemic |
| <i>Aerides rosea</i>              | Menghai  | 1100      | 18.96                   | 1314.38                   | 80.83             | 1150.91                      | 0.88          | Epiphyte    | Forest edge   | Non-endemic |
| <i>Aerides rosea</i>              | Menghai  | 1350      | 17.46                   | 1314.38                   | 80.83             | 1150.91                      | 0.88          | Epiphyte    | Sparse forest | Non-endemic |
| <i>Aerides rosea</i>              | Menghai  | 1530      | 16.38                   | 1314.38                   | 80.83             | 1150.91                      | 0.88          | Epiphyte    | Dense forest  | Non-endemic |
| <i>Agrostophyllum callosum</i>    | Pingbian | 1300      | 17.02                   | 1648.57                   | 86.34             | 990.16                       | 0.60          | Epiphyte    | Dense forest  | Non-endemic |
| <i>Agrostophyllum callosum</i>    | Hekou    | 1465      | 14.96                   | 1768.58                   | 84.25             | 1166.26                      | 0.66          | Epiphyte    | Dense forest  | Non-endemic |
| <i>Agrostophyllum callosum</i>    | Gongshan | 1500      | 15.08                   | 1738.42                   | 78.47             | 860.43                       | 0.50          | Epiphyte    | Dense forest  | Non-endemic |
| <i>Agrostophyllum callosum</i>    | Luxi     | 1750      | 14.58                   | 1650.33                   | 79.33             | 1183.39                      | 0.72          | Epiphyte    | Dense forest  | Non-endemic |
| <i>Agrostophyllum callosum</i>    | Jinghong | 1800      | 14.92                   | 1161.08                   | 80.46             | 1256.19                      | 1.08          | Epiphyte    | Dense forest  | Non-endemic |
| <i>Agrostophyllum callosum</i>    | Luchun   | 1900      | 15.30                   | 2013.54                   | 78.64             | 1151.56                      | 0.57          | Epiphyte    | Dense forest  | Non-endemic |
| <i>Agrostophyllum callosum</i>    | Jingdong | 2100      | 12.98                   | 1128.40                   | 76.80             | 1142.11                      | 1.01          | Epiphyte    | Grassy slope  | Non-endemic |
| <i>Agrostophyllum callosum</i>    | Menglian | 2200      | 12.38                   | 1357.68                   | 80.47             | 1185.94                      | 0.87          | Epiphyte    | Meadow        | Non-endemic |
| <i>Agrostophyllum callosum</i>    | Jingdong | 2400      | 11.18                   | 1128.40                   | 76.80             | 1142.11                      | 1.01          | Epiphyte    | Dense forest  | Non-endemic |
| <i>Amitostigma basifoliatum</i>   | Lijiang  | 2600      | 11.47                   | 982.53                    | 63.24             | 1077.65                      | 1.10          | Terrestrial | Dense forest  | Non-endemic |
| <i>Amitostigma basifoliatum</i>   | Lijiang  | 2750      | 10.57                   | 982.53                    | 63.24             | 1077.65                      | 1.10          | Terrestrial | Meadow        | Non-endemic |

|                                            |           |      |       |         |       |         |      |             |              |             |
|--------------------------------------------|-----------|------|-------|---------|-------|---------|------|-------------|--------------|-------------|
| <i>Amitostigma basifoliatum</i>            | Lijiang   | 2800 | 10.27 | 982.53  | 63.24 | 1077.65 | 1.10 | Terrestrial | Grassy slope | Non-endemic |
| <i>Amitostigma basifoliatum</i>            | Heqing    | 2800 | 9.99  | 977.00  | 65.16 | 1211.84 | 1.24 | Terrestrial | Meadow       | Non-endemic |
| <i>Amitostigma basifoliatum</i>            | Lijiang   | 2900 | 9.67  | 982.53  | 63.24 | 1077.65 | 1.10 | Terrestrial | Meadow       | Non-endemic |
| <i>Amitostigma basifoliatum</i>            | Weixi     | 3000 | 7.43  | 970.70  | 69.95 | 1021.03 | 1.05 | Terrestrial | Meadow       | Non-endemic |
| <i>Amitostigma basifoliatum</i>            | Huize     | 3600 | 3.77  | 799.98  | 71.46 | 1179.17 | 1.47 | Terrestrial | Meadow       | Non-endemic |
| <i>Amitostigma basifoliatum</i>            | Zhongdian | 4175 | 0.39  | 641.73  | 69.05 | 914.89  | 1.43 | Terrestrial | Meadow       | Non-endemic |
| <i>Amitostigma faberi</i>                  | Lijiang   | 2600 | 11.47 | 982.53  | 63.24 | 1077.65 | 1.10 | Terrestrial | Open site    | Non-endemic |
| <i>Amitostigma faberi</i>                  | Lijiang   | 2950 | 9.37  | 982.53  | 63.24 | 1077.65 | 1.10 | Terrestrial | Open site    | Non-endemic |
| <i>Amitostigma farreri</i>                 | Gongshan  | 3600 | 2.48  | 1738.42 | 78.47 | 860.43  | 0.50 | Terrestrial | Grassy slope | Endemic     |
| <i>Amitostigma hemipilioides</i>           | Zhongdian | 2500 | 10.44 | 641.73  | 69.05 | 914.89  | 1.43 | Terrestrial | Shrubland    | Non-endemic |
| <i>Amitostigma monanthum</i>               | Lijiang   | 3200 | 7.87  | 982.53  | 63.24 | 1077.65 | 1.10 | Terrestrial | Open site    | Non-endemic |
| <i>Amitostigma monanthum</i>               | Gongshan  | 3600 | 2.48  | 1738.42 | 78.47 | 860.43  | 0.50 | Terrestrial | Grassy slope | Non-endemic |
| <i>Amitostigma monanthum</i>               | Deqin     | 3700 | 2.97  | 639.48  | 70.85 | 896.66  | 1.40 | Terrestrial | Open site    | Non-endemic |
| <i>Amitostigma monanthum var.forrestii</i> | Zhongdian | 3700 | 3.24  | 641.73  | 69.05 | 914.89  | 1.43 | Terrestrial | Open site    | Non-endemic |
| <i>Amitostigma monanthum var.forrestii</i> | Zhongdian | 4000 | 1.44  | 641.73  | 69.05 | 914.89  | 1.43 | Terrestrial | Open site    | Non-endemic |
| <i>Amitostigma monanthum var.forrestii</i> | Deqin     | 4100 | 0.57  | 639.48  | 70.85 | 896.66  | 1.40 | Terrestrial | Open site    | Non-endemic |
| <i>Amitostigma simplex</i>                 | Gongshan  | 2200 | 10.88 | 1738.42 | 78.47 | 860.43  | 0.50 | Terrestrial | Grassy slope | Non-endemic |
| <i>Amitostigma tetralobum</i>              | Dali      | 1500 | 17.82 | 1082.70 | 68.61 | 1256.27 | 1.16 | Terrestrial | Grassy slope | Non-endemic |
| <i>Amitostigma tetralobum</i>              | Dali      | 2300 | 13.02 | 1082.70 | 68.61 | 1256.27 | 1.16 | Terrestrial | Open site    | Non-endemic |
| <i>Amitostigma tetralobum</i>              | Zhenyuan  | 2500 | 11.24 | 1254.48 | 77.40 | 1138.06 | 0.91 | Terrestrial | Meadow       | Non-endemic |
| <i>Amitostigma tibeticum</i>               | Fugong    | 3800 | 1.26  | 1441.43 | 79.99 | 906.18  | 0.63 | Terrestrial | Open site    | Non-endemic |
| <i>Amitostigma yuanum</i>                  | Fugong    | 3700 | 1.86  | 1441.43 | 79.99 | 906.18  | 0.63 | Terrestrial | Dense forest | Endemic     |
| <i>Amitostigma yuanum</i>                  | Yongde    | 3100 | 8.53  | 1266.25 | 69.00 | 1283.63 | 1.01 | Terrestrial | Grassy slope | Endemic     |
| <i>Androcorys pugioniformis</i>            | Zhongdian | 3880 | 2.16  | 641.73  | 69.05 | 914.89  | 1.43 | Terrestrial | Dense forest | Non-endemic |
| <i>Androcorys spiralis</i>                 | Zhongdian | 3500 | 4.44  | 641.73  | 69.05 | 914.89  | 1.43 | Terrestrial | Dense forest | Non-endemic |
| <i>Ania angustifolia</i>                   | Cangyuan  | 1200 | 18.02 | 1733.34 | 81.63 | 1060.82 | 0.61 | Terrestrial | Forest edge  | Non-endemic |
| <i>Ania angustifolia</i>                   | Jinghong  | 1650 | 15.82 | 1161.08 | 80.46 | 1256.19 | 1.08 | Terrestrial | Dense forest | Non-endemic |
| <i>Ania hookeriana</i>                     | Gongshan  | 1600 | 14.48 | 1738.42 | 78.47 | 860.43  | 0.50 | Terrestrial | Shrubland    | Non-endemic |
| <i>Anoectochilus burmanicus</i>            | Jinghong  | 1050 | 19.42 | 1161.08 | 80.46 | 1256.19 | 1.08 | Terrestrial | Dense forest | Non-endemic |
| <i>Anoectochilus burmanicus</i>            | Luchun    | 2150 | 13.80 | 2013.54 | 78.64 | 1151.56 | 0.57 | Terrestrial | Dense forest | Non-endemic |
| <i>Anoectochilus chapaensis</i>            | Pingbian  | 1380 | 16.54 | 1648.57 | 86.34 | 990.16  | 0.60 | Terrestrial | Dense forest | Non-endemic |
| <i>Anoectochilus crispus</i>               | Zhenyuan  | 1800 | 15.44 | 1254.48 | 77.40 | 1138.06 | 0.91 | Terrestrial | Dense forest | Non-endemic |
| <i>Anoectochilus elwesii</i>               | Maguan    | 800  | 20.21 | 1330.52 | 83.25 | 1086.43 | 0.82 | Terrestrial | Dense forest | Non-endemic |

|                                    |           |      |       |         |       |         |      |             |               |             |
|------------------------------------|-----------|------|-------|---------|-------|---------|------|-------------|---------------|-------------|
| <i>Anoectochilus elwesii</i>       | Xichou    | 1200 | 17.73 | 1267.54 | 82.98 | 985.97  | 0.78 | Terrestrial | Dense forest  | Non-endemic |
| <i>Anoectochilus elwesii</i>       | Menghai   | 1480 | 16.68 | 1314.38 | 80.83 | 1150.91 | 0.88 | Terrestrial | Dense forest  | Non-endemic |
| <i>Anoectochilus elwesii</i>       | Gongshan  | 1500 | 15.08 | 1738.42 | 78.47 | 860.43  | 0.50 | Terrestrial | Dense forest  | Non-endemic |
| <i>Anoectochilus gengmanensis</i>  | Fengqing  | 2500 | 11.45 | 1352.80 | 73.24 | 1172.52 | 0.87 | Terrestrial | Dense forest  | Endemic     |
| <i>Anoectochilus gengmanensis</i>  | Gengma    | 2500 | 19.04 | 1327.70 | 77.28 | 1181.78 | 0.89 | Terrestrial | Dense forest  | Endemic     |
| <i>Anoectochilus grandiflorus</i>  | Mengla    | 590  | 21.66 | 1514.70 | 84.25 | 1146.68 | 0.76 | Terrestrial | Dense forest  | Non-endemic |
| <i>Anoectochilus grandiflorus</i>  | Pingbian  | 1260 | 17.26 | 1648.57 | 86.34 | 990.16  | 0.60 | Terrestrial | Dense forest  | Non-endemic |
| <i>Anoectochilus lanceolatus</i>   | Gongshan  | 1800 | 13.28 | 1738.42 | 78.47 | 860.43  | 0.50 | Terrestrial | Dense forest  | Non-endemic |
| <i>Anoectochilus minor</i>         | Gongshan  | 2800 | 7.28  | 1738.42 | 78.47 | 860.43  | 0.50 | Terrestrial | Dense forest  | Non-endemic |
| <i>Anoectochilus moulmeinensis</i> | Gongshan  | 1380 | 15.80 | 1738.42 | 78.47 | 860.43  | 0.50 | Terrestrial | Dense forest  | Non-endemic |
| <i>Anoectochilus moulmeinensis</i> | Malipo    | 1500 | 15.26 | 1063.54 | 85.83 | 1053.97 | 0.99 | Terrestrial | Dense forest  | Non-endemic |
| <i>Anoectochilus moulmeinensis</i> | Zhenyuan  | 1800 | 15.44 | 1254.48 | 77.40 | 1138.06 | 0.91 | Terrestrial | Dense forest  | Non-endemic |
| <i>Anoectochilus roxburghii</i>    | Mengla    | 650  | 21.30 | 1514.70 | 84.25 | 1146.68 | 0.76 | Terrestrial | Grassy slope  | Non-endemic |
| <i>Anoectochilus roxburghii</i>    | Malipo    | 1000 | 18.26 | 1063.54 | 85.83 | 1053.97 | 0.99 | Terrestrial | Dense forest  | Non-endemic |
| <i>Anoectochilus roxburghii</i>    | Yanshan   | 1100 | 18.86 | 1003.57 | 79.42 | 1172.21 | 1.17 | Terrestrial | Dense forest  | Non-endemic |
| <i>Anoectochilus roxburghii</i>    | Pingbian  | 1500 | 15.82 | 1648.57 | 86.34 | 990.16  | 0.60 | Terrestrial | Dense forest  | Non-endemic |
| <i>Anoectochilus roxburghii</i>    | Menghai   | 1600 | 15.96 | 1314.38 | 80.83 | 1150.91 | 0.88 | Terrestrial | Dense forest  | Non-endemic |
| <i>Anoectochilus roxburghii</i>    | Jinghong  | 1800 | 14.92 | 1161.08 | 80.46 | 1256.19 | 1.08 | Terrestrial | Dense forest  | Non-endemic |
| <i>Anoectochilus roxburghii</i>    | Lianghe   | 2130 | 11.69 | 1388.65 | 79.72 | 1192.10 | 0.86 | Terrestrial | Dense forest  | Non-endemic |
| <i>Anoectochilus tortus</i>        | Pingbian  | 1000 | 18.82 | 1648.57 | 86.34 | 990.16  | 0.60 | Terrestrial | Dense forest  | Non-endemic |
| <i>Anoectochilus yunnanensis</i>   | Xichou    | 1550 | 15.63 | 1267.54 | 82.98 | 985.97  | 0.78 | Terrestrial | Dense forest  | Endemic     |
| <i>Anoectochilus yunnanensis</i>   | Wenshan   | 1820 | 14.74 | 988.87  | 76.70 | 1272.98 | 1.29 | Terrestrial | Dense forest  | Endemic     |
| <i>Anoectochilus yunnanensis</i>   | Gongshan  | 1850 | 12.98 | 1738.42 | 78.47 | 860.43  | 0.50 | Terrestrial | Dense forest  | Endemic     |
| <i>Anoectochilus yunnanensis</i>   | Gongshan  | 2000 | 12.08 | 1738.42 | 78.47 | 860.43  | 0.50 | Terrestrial | Dense forest  | Endemic     |
| <i>Anota densiflora</i>            | Malipo    | 1000 | 18.26 | 1063.54 | 85.83 | 1053.97 | 0.99 | Terrestrial | Sparse forest | Non-endemic |
| <i>Anthogonium gracile</i>         | Menghai   | 858  | 20.41 | 1314.38 | 80.83 | 1150.91 | 0.88 | Terrestrial | Open site     | Non-endemic |
| <i>Anthogonium gracile</i>         | Zhenyuan  | 1000 | 20.24 | 1254.48 | 77.40 | 1138.06 | 0.91 | Terrestrial | Forest edge   | Non-endemic |
| <i>Anthogonium gracile</i>         | Wenshan   | 1250 | 18.16 | 988.87  | 76.70 | 1272.98 | 1.29 | Terrestrial | Grassy slope  | Non-endemic |
| <i>Anthogonium gracile</i>         | Puer      | 1300 | 18.46 | 1429.78 | 79.51 | 1123.79 | 0.79 | Terrestrial | Dense forest  | Non-endemic |
| <i>Anthogonium gracile</i>         | Luchun    | 1300 | 18.90 | 2013.54 | 78.64 | 1151.56 | 0.57 | Terrestrial | Open site     | Non-endemic |
| <i>Anthogonium gracile</i>         | Tengchong | 1320 | 17.08 | 1501.45 | 78.06 | 857.93  | 0.57 | Terrestrial | Sparse forest | Non-endemic |
| <i>Anthogonium gracile</i>         | Pingbian  | 1380 | 16.54 | 1648.57 | 86.34 | 990.16  | 0.60 | Terrestrial | Dense forest  | Non-endemic |
| <i>Anthogonium gracile</i>         | Gongshan  | 1450 | 15.38 | 1738.42 | 78.47 | 860.43  | 0.50 | Terrestrial | Open site     | Non-endemic |
| <i>Anthogonium gracile</i>         | Shiping   | 1466 | 17.77 | 919.48  | 75.04 | 1244.05 | 1.35 | Terrestrial | Dense forest  | Non-endemic |
| <i>Anthogonium gracile</i>         | Guangnan  | 1500 | 15.25 | 1044.26 | 78.94 | 1090.35 | 1.04 | Terrestrial | Shrubland     | Non-endemic |
| <i>Anthogonium gracile</i>         | Zhenyuan  | 1500 | 17.24 | 1254.48 | 77.40 | 1138.06 | 0.91 | Terrestrial | Shrubland     | Non-endemic |

|                              |            |      |       |         |       |         |      |             |               |             |
|------------------------------|------------|------|-------|---------|-------|---------|------|-------------|---------------|-------------|
| <i>Anthogonium gracile</i>   | Jingdong   | 1600 | 15.98 | 1128.40 | 76.80 | 1142.11 | 1.01 | Terrestrial | Dense forest  | Non-endemic |
| <i>Anthogonium gracile</i>   | Jiangcheng | 1600 | 15.53 | 2264.27 | 84.63 | 1061.90 | 0.47 | Terrestrial | Dense forest  | Non-endemic |
| <i>Anthogonium gracile</i>   | Zhenyuan   | 1600 | 16.64 | 1254.48 | 77.40 | 1138.06 | 0.91 | Terrestrial | Grassy slope  | Non-endemic |
| <i>Anthogonium gracile</i>   | Zhenyuan   | 1600 | 16.64 | 1254.48 | 77.40 | 1138.06 | 0.91 | Terrestrial | Open site     | Non-endemic |
| <i>Anthogonium gracile</i>   | Fengqing   | 1600 | 16.60 | 1352.80 | 73.24 | 1172.52 | 0.87 | Terrestrial | Shrubland     | Non-endemic |
| <i>Anthogonium gracile</i>   | Menghai    | 1600 | 15.96 | 1314.38 | 80.83 | 1150.91 | 0.88 | Terrestrial | Sparse forest | Non-endemic |
| <i>Anthogonium gracile</i>   | Jingdong   | 1650 | 15.68 | 1128.40 | 76.80 | 1142.11 | 1.01 | Terrestrial | Dense forest  | Non-endemic |
| <i>Anthogonium gracile</i>   | Zhenyuan   | 1650 | 16.34 | 1254.48 | 77.40 | 1138.06 | 0.91 | Terrestrial | Open site     | Non-endemic |
| <i>Anthogonium gracile</i>   | Jingdong   | 1660 | 15.62 | 1128.40 | 76.80 | 1142.11 | 1.01 | Terrestrial | Dense forest  | Non-endemic |
| <i>Anthogonium gracile</i>   | Jiangchuan | 1700 | 15.80 | 872.74  | 74.72 | 1181.99 | 1.35 | Terrestrial | Dense forest  | Non-endemic |
| <i>Anthogonium gracile</i>   | Luchun     | 1700 | 16.50 | 2013.54 | 78.64 | 1151.56 | 0.57 | Terrestrial | Shrubland     | Non-endemic |
| <i>Anthogonium gracile</i>   | Wenshan    | 1800 | 14.86 | 988.87  | 76.70 | 1272.98 | 1.29 | Terrestrial | Shrubland     | Non-endemic |
| <i>Anthogonium gracile</i>   | Zhenyuan   | 1850 | 15.14 | 1254.48 | 77.40 | 1138.06 | 0.91 | Terrestrial | Grassy slope  | Non-endemic |
| <i>Anthogonium gracile</i>   | Eshan      | 1890 | 13.87 | 938.39  | 78.62 | 1123.48 | 1.20 | Terrestrial | Shrubland     | Non-endemic |
| <i>Anthogonium gracile</i>   | Gongshan   | 1900 | 12.68 | 1738.42 | 78.47 | 860.43  | 0.50 | Terrestrial | Forest edge   | Non-endemic |
| <i>Anthogonium gracile</i>   | Wenshan    | 1900 | 14.26 | 988.87  | 76.70 | 1272.98 | 1.29 | Terrestrial | Grassy slope  | Non-endemic |
| <i>Anthogonium gracile</i>   | Jiangchuan | 1950 | 14.30 | 872.74  | 74.72 | 1181.99 | 1.35 | Terrestrial | Dense forest  | Non-endemic |
| <i>Anthogonium gracile</i>   | Kunming    | 1950 | 14.58 | 1019.14 | 72.30 | 1197.62 | 1.18 | Terrestrial | Dense forest  | Non-endemic |
| <i>Anthogonium gracile</i>   | Maguan     | 1950 | 13.31 | 1330.52 | 83.25 | 1086.43 | 0.82 | Terrestrial | Dense forest  | Non-endemic |
| <i>Anthogonium gracile</i>   | Yuliang    | 1962 | 13.75 | 905.45  | 75.03 | 1218.48 | 1.35 | Terrestrial | Dense forest  | Non-endemic |
| <i>Anthogonium gracile</i>   | Gongshan   | 2000 | 12.08 | 1738.42 | 78.47 | 860.43  | 0.50 | Terrestrial | Grassy slope  | Non-endemic |
| <i>Anthogonium gracile</i>   | Hekou      | 2000 | 11.75 | 1768.58 | 84.25 | 1166.26 | 0.66 | Terrestrial | Open site     | Non-endemic |
| <i>Anthogonium gracile</i>   | Zhenyuan   | 2000 | 14.24 | 1254.48 | 77.40 | 1138.06 | 0.91 | Terrestrial | Shrubland     | Non-endemic |
| <i>Anthogonium gracile</i>   | Jinping    | 2250 | 11.99 | 2305.17 | 83.81 | 1030.46 | 0.45 | Terrestrial | Dense forest  | Non-endemic |
| <i>Anthogonium gracile</i>   | Gongshan   | 2300 | 10.28 | 1738.42 | 78.47 | 860.43  | 0.50 | Terrestrial | Dense forest  | Non-endemic |
| <i>Anthogonium gracile</i>   | Kunming    | 2300 | 12.48 | 1019.14 | 72.30 | 1197.62 | 1.18 | Terrestrial | Grassy slope  | Non-endemic |
| <i>Anthogonium gracile</i>   | Yongde     | 2300 | 13.33 | 1266.25 | 69.00 | 1283.63 | 1.01 | Terrestrial | Grassy slope  | Non-endemic |
| <i>Aphyllorchis caudata</i>  | Zhenkang   | 2650 | 8.94  | 1602.96 | 81.14 | 1089.09 | 0.68 | Saprophyte  | Dense forest  | Non-endemic |
| <i>Aphyllorchis gollanii</i> | Yongde     | 2400 | 12.73 | 1266.25 | 69.00 | 1283.63 | 1.01 | Terrestrial | Dense forest  | Non-endemic |
| <i>Aphyllorchis montana</i>  | Jinghong   | 1500 | 16.72 | 1161.08 | 80.46 | 1256.19 | 1.08 | Saprophyte  | Dense forest  | Non-endemic |
| <i>Appendicula cornuta</i>   | Mengla     | 830  | 20.22 | 1514.70 | 84.25 | 1146.68 | 0.76 | Epiphyte    | Dense forest  | Non-endemic |
| <i>Arachnis labrosa</i>      | Menghai    | 1080 | 19.08 | 1314.38 | 80.83 | 1150.91 | 0.88 | Epiphyte    | Dense forest  | Non-endemic |
| <i>Arundina graminifolia</i> | Hekou      | 120  | 23.03 | 1768.58 | 84.25 | 1166.26 | 0.66 | Terrestrial | Open site     | Non-endemic |
| <i>Arundina graminifolia</i> | Hekou      | 170  | 22.73 | 1768.58 | 84.25 | 1166.26 | 0.66 | Terrestrial | Sparse forest | Non-endemic |
| <i>Arundina graminifolia</i> | Hekou      | 280  | 22.07 | 1768.58 | 84.25 | 1166.26 | 0.66 | Terrestrial | Dense forest  | Non-endemic |
| <i>Arundina graminifolia</i> | Hekou      | 365  | 21.56 | 1768.58 | 84.25 | 1166.26 | 0.66 | Terrestrial | Dense forest  | Non-endemic |



|                                |             |      |       |         |       |         |      |             |               |             |
|--------------------------------|-------------|------|-------|---------|-------|---------|------|-------------|---------------|-------------|
| <i>Arundina graminifolia</i>   | Malipo      | 500  | 21.26 | 1063.54 | 85.83 | 1053.97 | 0.99 | Terrestrial | Sparse forest | Non-endemic |
| <i>Arundina graminifolia</i>   | Luchun      | 530  | 23.52 | 2013.54 | 78.64 | 1151.56 | 0.57 | Terrestrial | Open site     | Non-endemic |
| <i>Arundina graminifolia</i>   | Luchun      | 530  | 23.52 | 2013.54 | 78.64 | 1151.56 | 0.57 | Terrestrial | Shrubland     | Non-endemic |
| <i>Arundina graminifolia</i>   | Jinping     | 550  | 22.19 | 2305.17 | 83.81 | 1030.46 | 0.45 | Terrestrial | Dense forest  | Non-endemic |
| <i>Arundina graminifolia</i>   | Luchun      | 600  | 23.10 | 2013.54 | 78.64 | 1151.56 | 0.57 | Terrestrial | Open site     | Non-endemic |
| <i>Arundina graminifolia</i>   | Hekou       | 900  | 18.35 | 1768.58 | 84.25 | 1166.26 | 0.66 | Terrestrial | Open site     | Non-endemic |
| <i>Arundina graminifolia</i>   | Mengzi      | 950  | 20.76 | 855.35  | 71.82 | 1434.56 | 1.68 | Terrestrial | Open site     | Non-endemic |
| <i>Arundina graminifolia</i>   | Luxi        | 1000 | 19.08 | 1650.33 | 79.33 | 1183.39 | 0.72 | Terrestrial | Grassy slope  | Non-endemic |
| <i>Arundina graminifolia</i>   | Mengla      | 1040 | 18.96 | 1514.70 | 84.25 | 1146.68 | 0.76 | Terrestrial | Grassy slope  | Non-endemic |
| <i>Arundina graminifolia</i>   | Zhenkang    | 1180 | 17.76 | 1602.96 | 81.14 | 1089.09 | 0.68 | Terrestrial | Dense forest  | Non-endemic |
| <i>Arundina graminifolia</i>   | Fugong      | 1200 | 16.86 | 1441.43 | 79.99 | 906.18  | 0.63 | Terrestrial | Dense forest  | Non-endemic |
| <i>Arundina graminifolia</i>   | Lancang     | 1200 | 18.50 | 1596.50 | 77.88 | 1183.80 | 0.74 | Terrestrial | Dense forest  | Non-endemic |
| <i>Arundina graminifolia</i>   | Jiangcheng  | 1200 | 17.93 | 2264.27 | 84.63 | 1061.90 | 0.47 | Terrestrial | Grassy slope  | Non-endemic |
| <i>Arundina graminifolia</i>   | Jinghong    | 1200 | 18.52 | 1161.08 | 80.46 | 1256.19 | 1.08 | Terrestrial | Open site     | Non-endemic |
| <i>Arundina graminifolia</i>   | Hekou       | 1250 | 16.25 | 1768.58 | 84.25 | 1166.26 | 0.66 | Terrestrial | Open site     | Non-endemic |
| <i>Arundina graminifolia</i>   | Lincang     | 1300 | 18.72 | 1165.84 | 72.08 | 1167.73 | 1.00 | Terrestrial | Dense forest  | Non-endemic |
| <i>Arundina graminifolia</i>   | Funing      | 1300 | 15.82 | 1161.58 | 79.07 | 1147.17 | 0.99 | Terrestrial | Forest edge   | Non-endemic |
| <i>Arundina graminifolia</i>   | Gongshan    | 1300 | 16.28 | 1738.42 | 78.47 | 860.43  | 0.50 | Terrestrial | Shrubland     | Non-endemic |
| <i>Arundina graminifolia</i>   | Tengchong   | 1320 | 17.08 | 1501.45 | 78.06 | 857.93  | 0.57 | Terrestrial | Dense forest  | Non-endemic |
| <i>Arundina graminifolia</i>   | Funing      | 1400 | 15.22 | 1161.58 | 79.07 | 1147.17 | 0.99 | Terrestrial | Dense forest  | Non-endemic |
| <i>Arundina graminifolia</i>   | Maguan      | 1500 | 16.01 | 1330.52 | 83.25 | 1086.43 | 0.82 | Terrestrial | Dense forest  | Non-endemic |
| <i>Arundina graminifolia</i>   | Xichou      | 1500 | 15.93 | 1267.54 | 82.98 | 985.97  | 0.78 | Terrestrial | Open site     | Non-endemic |
| <i>Arundina graminifolia</i>   | Shuangjiang | 1500 | 16.98 | 1006.64 | 75.26 | 1272.13 | 1.26 | Terrestrial | Sparse forest | Non-endemic |
| <i>Arundina graminifolia</i>   | Yuanjiang   | 1600 | 16.58 | 805.59  | 69.08 | 1652.32 | 2.05 | Terrestrial | Grassy slope  | Non-endemic |
| <i>Arundina graminifolia</i>   | Tengchong   | 1600 | 15.40 | 1501.45 | 78.06 | 857.93  | 0.57 | Terrestrial | Shrubland     | Non-endemic |
| <i>Arundina graminifolia</i>   | Menglian    | 1650 | 15.68 | 1357.68 | 80.47 | 1185.94 | 0.87 | Terrestrial | Meadow        | Non-endemic |
| <i>Arundina graminifolia</i>   | Luchun      | 1700 | 16.50 | 2013.54 | 78.64 | 1151.56 | 0.57 | Terrestrial | Shrubland     | Non-endemic |
| <i>Arundina graminifolia</i>   | Fugong      | 1850 | 12.96 | 1441.43 | 79.99 | 906.18  | 0.63 | Terrestrial | Open site     | Non-endemic |
| <i>Arundina graminifolia</i>   | Lianghe     | 2068 | 12.06 | 1388.65 | 79.72 | 1192.10 | 0.86 | Terrestrial | Open site     | Non-endemic |
| <i>Arundina graminifolia</i>   | Fugong      | 2100 | 11.46 | 1441.43 | 79.99 | 906.18  | 0.63 | Terrestrial | Open site     | Non-endemic |
| <i>Arundina graminifolia</i>   | Maguan      | 2400 | 10.61 | 1330.52 | 83.25 | 1086.43 | 0.82 | Terrestrial | Grassy slope  | Non-endemic |
| <i>Arundina graminifolia</i>   | Eryuan      | 2580 | 11.05 | 745.16  | 68.27 | 1210.94 | 1.63 | Terrestrial | Dense forest  | Non-endemic |
| <i>Ascocentrum ampullaceum</i> | Jinghong    | 1150 | 18.82 | 1161.08 | 80.46 | 1256.19 | 1.08 | Epiphyte    | Dense forest  | Non-endemic |
| <i>Ascocentrum ampullaceum</i> | Cangyuan    | 1200 | 18.02 | 1733.34 | 81.63 | 1060.82 | 0.61 | Epiphyte    | Dense forest  | Non-endemic |
| <i>Ascocentrum ampullaceum</i> | Lancang     | 1500 | 16.70 | 1596.50 | 77.88 | 1183.80 | 0.74 | Epiphyte    | Dense forest  | Non-endemic |
| <i>Ascocentrum himalaicum</i>  | Longling    | 1510 | 15.06 | 2098.66 | 84.65 | 973.45  | 0.46 | Epiphyte    | Dense forest  | Non-endemic |

|                               |           |      |       |         |       |         |      |             |               |             |
|-------------------------------|-----------|------|-------|---------|-------|---------|------|-------------|---------------|-------------|
| <i>Ascocentrum himalaicum</i> | Menghai   | 1770 | 14.94 | 1314.38 | 80.83 | 1150.91 | 0.88 | Epiphyte    | Sparse forest | Non-endemic |
| <i>Ascocentrum himalaicum</i> | Gongshan  | 1900 | 12.68 | 1738.42 | 78.47 | 860.43  | 0.50 | Epiphyte    | Dense forest  | Non-endemic |
| <i>Bletilla formosana</i>     | Funing    | 900  | 18.22 | 1161.58 | 79.07 | 1147.17 | 0.99 | Terrestrial | Grassy slope  | Non-endemic |
| <i>Bletilla formosana</i>     | Jinping   | 900  | 20.09 | 2305.17 | 83.81 | 1030.46 | 0.45 | Terrestrial | Grassy slope  | Non-endemic |
| <i>Bletilla formosana</i>     | Yanshan   | 1200 | 18.26 | 1003.57 | 79.42 | 1172.21 | 1.17 | Terrestrial | Sparse forest | Non-endemic |
| <i>Bletilla formosana</i>     | Xichou    | 1350 | 16.83 | 1267.54 | 82.98 | 985.97  | 0.78 | Terrestrial | Sparse forest | Non-endemic |
| <i>Bletilla formosana</i>     | Gongshan  | 1400 | 15.68 | 1738.42 | 78.47 | 860.43  | 0.50 | Terrestrial | Forest edge   | Non-endemic |
| <i>Bletilla formosana</i>     | Jinping   | 1400 | 17.09 | 2305.17 | 83.81 | 1030.46 | 0.45 | Terrestrial | Grassy slope  | Non-endemic |
| <i>Bletilla formosana</i>     | Wenshan   | 1400 | 17.26 | 988.87  | 76.70 | 1272.98 | 1.29 | Terrestrial | Grassy slope  | Non-endemic |
| <i>Bletilla formosana</i>     | Weixin    | 1450 | 11.74 | 1041.32 | 84.86 | 804.04  | 0.77 | Terrestrial | Grassy slope  | Non-endemic |
| <i>Bletilla formosana</i>     | Dali      | 1500 | 17.82 | 1082.70 | 68.61 | 1256.27 | 1.16 | Terrestrial | Grassy slope  | Non-endemic |
| <i>Bletilla formosana</i>     | Gongshan  | 1680 | 14.00 | 1738.42 | 78.47 | 860.43  | 0.50 | Terrestrial | Grassy slope  | Non-endemic |
| <i>Bletilla formosana</i>     | Midu      | 1830 | 15.36 | 767.67  | 68.75 | 1326.41 | 1.73 | Terrestrial | Grassy slope  | Non-endemic |
| <i>Bletilla formosana</i>     | Dayao     | 1900 | 15.53 | 810.80  | 65.01 | 1427.38 | 1.76 | Terrestrial | Shrubland     | Non-endemic |
| <i>Bletilla formosana</i>     | Lushui    | 2000 | 14.05 | 1195.57 | 70.63 | 911.65  | 0.76 | Terrestrial | Dense forest  | Non-endemic |
| <i>Bletilla formosana</i>     | Gongshan  | 2000 | 12.08 | 1738.42 | 78.47 | 860.43  | 0.50 | Terrestrial | Dense forest  | Non-endemic |
| <i>Bletilla formosana</i>     | Lijiang   | 2000 | 15.07 | 982.53  | 63.24 | 1077.65 | 1.10 | Terrestrial | Dense forest  | Non-endemic |
| <i>Bletilla formosana</i>     | Dayao     | 2000 | 14.93 | 810.80  | 65.01 | 1427.38 | 1.76 | Terrestrial | Shrubland     | Non-endemic |
| <i>Bletilla formosana</i>     | Luoping   | 2000 | 12.04 | 1686.24 | 82.51 | 1040.03 | 0.62 | Terrestrial | Sparse forest | Non-endemic |
| <i>Bletilla formosana</i>     | Jingdong  | 2032 | 13.39 | 1128.40 | 76.80 | 1142.11 | 1.01 | Terrestrial | Dense forest  | Non-endemic |
| <i>Bletilla formosana</i>     | Luquan    | 2100 | 13.12 | 965.09  | 73.60 | 1160.89 | 1.20 | Terrestrial | Shrubland     | Non-endemic |
| <i>Bletilla formosana</i>     | Binchuan  | 2200 | 13.50 | 573.87  | 62.93 | 1418.42 | 2.47 | Terrestrial | Forest edge   | Non-endemic |
| <i>Bletilla formosana</i>     | Kunming   | 2300 | 12.48 | 1019.14 | 72.30 | 1197.62 | 1.18 | Terrestrial | Open site     | Non-endemic |
| <i>Bletilla formosana</i>     | Zhongdian | 2300 | 11.64 | 641.73  | 69.05 | 914.89  | 1.43 | Terrestrial | Shrubland     | Non-endemic |
| <i>Bletilla formosana</i>     | Kunming   | 2320 | 12.36 | 1019.14 | 72.30 | 1197.62 | 1.18 | Terrestrial | Grassy slope  | Non-endemic |
| <i>Bletilla formosana</i>     | Zhongdian | 2350 | 11.34 | 641.73  | 69.05 | 914.89  | 1.43 | Terrestrial | Shrubland     | Non-endemic |
| <i>Bletilla formosana</i>     | Songming  | 2400 | 11.19 | 1010.18 | 74.14 | 1134.24 | 1.12 | Terrestrial | Open site     | Non-endemic |
| <i>Bletilla formosana</i>     | Yongde    | 2400 | 12.73 | 1266.25 | 69.00 | 1283.63 | 1.01 | Terrestrial | Open site     | Non-endemic |
| <i>Bletilla formosana</i>     | Songming  | 2400 | 11.19 | 1010.18 | 74.14 | 1134.24 | 1.12 | Terrestrial | Open site     | Non-endemic |
| <i>Bletilla formosana</i>     | Deqin     | 2500 | 10.17 | 639.48  | 70.85 | 896.66  | 1.40 | Terrestrial | Dense forest  | Non-endemic |
| <i>Bletilla formosana</i>     | Zhongdian | 2500 | 10.44 | 641.73  | 69.05 | 914.89  | 1.43 | Terrestrial | Grassy slope  | Non-endemic |
| <i>Bletilla formosana</i>     | Deqin     | 2500 | 10.17 | 639.48  | 70.85 | 896.66  | 1.40 | Terrestrial | Grassy slope  | Non-endemic |
| <i>Bletilla formosana</i>     | Kunming   | 2500 | 11.28 | 1019.14 | 72.30 | 1197.62 | 1.18 | Terrestrial | Grassy slope  | Non-endemic |
| <i>Bletilla formosana</i>     | Deqin     | 2500 | 10.17 | 639.48  | 70.85 | 896.66  | 1.40 | Terrestrial | Grassy slope  | Non-endemic |
| <i>Bletilla formosana</i>     | Gongshan  | 2600 | 8.48  | 1738.42 | 78.47 | 860.43  | 0.50 | Terrestrial | Dense forest  | Non-endemic |
| <i>Bletilla formosana</i>     | Lijiang   | 2600 | 11.47 | 982.53  | 63.24 | 1077.65 | 1.10 | Terrestrial | Grassy slope  | Non-endemic |

|                                 |           |      |       |         |       |         |      |             |               |             |
|---------------------------------|-----------|------|-------|---------|-------|---------|------|-------------|---------------|-------------|
| <i>Bletilla formosana</i>       | Deqin     | 2700 | 8.97  | 639.48  | 70.85 | 896.66  | 1.40 | Terrestrial | Dense forest  | Non-endemic |
| <i>Bletilla formosana</i>       | Jianchuan | 2744 | 9.08  | 753.13  | 70.16 | 1154.48 | 1.53 | Terrestrial | Dense forest  | Non-endemic |
| <i>Bletilla formosana</i>       | Eryuan    | 3050 | 8.23  | 745.16  | 68.27 | 1210.94 | 1.63 | Terrestrial | Dense forest  | Non-endemic |
| <i>Bletilla formosana</i>       | Fugong    | 3100 | 5.46  | 1441.43 | 79.99 | 906.18  | 0.63 | Terrestrial | Dense forest  | Non-endemic |
| <i>Bletilla ochracea</i>        | Pingbian  | 400  | 22.42 | 1648.57 | 86.34 | 990.16  | 0.60 | Terrestrial | Shrubland     | Non-endemic |
| <i>Bletilla ochracea</i>        | Suijiang  | 550  | 17.03 | 917.85  | 78.74 | 923.40  | 1.01 | Terrestrial | Open site     | Non-endemic |
| <i>Bletilla ochracea</i>        | Xichou    | 804  | 20.11 | 1267.54 | 82.98 | 985.97  | 0.78 | Terrestrial | Dense forest  | Non-endemic |
| <i>Bletilla ochracea</i>        | Xichou    | 1350 | 16.83 | 1267.54 | 82.98 | 985.97  | 0.78 | Terrestrial | Dense forest  | Non-endemic |
| <i>Bletilla ochracea</i>        | Jingdong  | 1380 | 17.30 | 1128.40 | 76.80 | 1142.11 | 1.01 | Terrestrial | Dense forest  | Non-endemic |
| <i>Bletilla ochracea</i>        | Luquan    | 1960 | 13.96 | 965.09  | 73.60 | 1160.89 | 1.20 | Terrestrial | Open site     | Non-endemic |
| <i>Bletilla ochracea</i>        | Anning    | 2100 | 13.43 | 896.67  | 71.23 | 1167.91 | 1.30 | Terrestrial | Dense forest  | Non-endemic |
| <i>Bletilla ochracea</i>        | Kunming   | 2200 | 13.08 | 1019.14 | 72.30 | 1197.62 | 1.18 | Terrestrial | Dense forest  | Non-endemic |
| <i>Bletilla ochracea</i>        | Zhongdian | 2350 | 11.34 | 641.73  | 69.05 | 914.89  | 1.43 | Terrestrial | Shrubland     | Non-endemic |
| <i>Bletilla ochracea</i>        | Kunming   | 2500 | 11.28 | 1019.14 | 72.30 | 1197.62 | 1.18 | Terrestrial | Grassy slope  | Non-endemic |
| <i>Bletilla ochracea</i>        | Heqing    | 2840 | 9.75  | 977.00  | 65.16 | 1211.84 | 1.24 | Terrestrial | Grassy slope  | Non-endemic |
| <i>Bletilla ochracea</i>        | Zhongdian | 3300 | 5.64  | 641.73  | 69.05 | 914.89  | 1.43 | Terrestrial | Sparse forest | Non-endemic |
| <i>Bletilla striata</i>         | Fuyuan    | 2250 | 11.37 | 1084.02 | 74.80 | 1096.10 | 1.01 | Terrestrial | Grassy slope  | Non-endemic |
| <i>Brachycorythis galeandra</i> | Huaping   | 1200 | 19.95 | 1092.50 | 61.93 | 1424.09 | 1.30 | Terrestrial | Shrubland     | Non-endemic |
| <i>Brachycorythis galeandra</i> | Yangbi    | 2000 | 13.99 | 1044.23 | 72.19 | 1161.15 | 1.11 | Terrestrial | Grassy slope  | Non-endemic |
| <i>Brachycorythis galeandra</i> | Yangbi    | 2000 | 13.99 | 1044.23 | 72.19 | 1161.15 | 1.11 | Terrestrial | Grassy slope  | Non-endemic |
| <i>Brachycorythis henryi</i>    | Mengla    | 500  | 22.20 | 1514.70 | 84.25 | 1146.68 | 0.76 | Terrestrial | Dense forest  | Non-endemic |
| <i>Brachycorythis henryi</i>    | Jinghong  | 550  | 22.42 | 1161.08 | 80.46 | 1256.19 | 1.08 | Terrestrial | Open site     | Non-endemic |
| <i>Brachycorythis henryi</i>    | Jinghong  | 700  | 21.52 | 1161.08 | 80.46 | 1256.19 | 1.08 | Terrestrial | Dense forest  | Non-endemic |
| <i>Brachycorythis henryi</i>    | Mengla    | 950  | 19.50 | 1514.70 | 84.25 | 1146.68 | 0.76 | Terrestrial | Dense forest  | Non-endemic |
| <i>Brachycorythis henryi</i>    | Jinghong  | 960  | 19.96 | 1161.08 | 80.46 | 1256.19 | 1.08 | Terrestrial | Dense forest  | Non-endemic |
| <i>Brachycorythis henryi</i>    | Jinghong  | 960  | 19.96 | 1161.08 | 80.46 | 1256.19 | 1.08 | Terrestrial | Dense forest  | Non-endemic |
| <i>Brachycorythis henryi</i>    | Jinghong  | 1060 | 19.36 | 1161.08 | 80.46 | 1256.19 | 1.08 | Terrestrial | Dense forest  | Non-endemic |
| <i>Brachycorythis henryi</i>    | Menglian  | 1650 | 15.68 | 1357.68 | 80.47 | 1185.94 | 0.87 | Terrestrial | Open site     | Non-endemic |
| <i>Brachycorythis henryi</i>    | Jinghong  | 1750 | 15.22 | 1161.08 | 80.46 | 1256.19 | 1.08 | Terrestrial | Dense forest  | Non-endemic |
| <i>Brachycorythis henryi</i>    | Jinghong  | 1750 | 15.22 | 1161.08 | 80.46 | 1256.19 | 1.08 | Terrestrial | Dense forest  | Non-endemic |
| <i>Bulbophyllum affine</i>      | Menghai   | 1100 | 18.96 | 1314.38 | 80.83 | 1150.91 | 0.88 | Epiphyte    | Dense forest  | Non-endemic |
| <i>Bulbophyllum affine</i>      | Menghai   | 1300 | 17.76 | 1314.38 | 80.83 | 1150.91 | 0.88 | Epiphyte    | Dense forest  | Non-endemic |
| <i>Bulbophyllum affine</i>      | Menghai   | 1530 | 16.38 | 1314.38 | 80.83 | 1150.91 | 0.88 | Epiphyte    | Dense forest  | Non-endemic |
| <i>Bulbophyllum affine</i>      | Menghai   | 1550 | 16.26 | 1314.38 | 80.83 | 1150.91 | 0.88 | Epiphyte    | Dense forest  | Non-endemic |
| <i>Bulbophyllum ambrosia</i>    | Xichou    | 1300 | 17.13 | 1267.54 | 82.98 | 985.97  | 0.78 | Epiphyte    | Dense forest  | Non-endemic |
| <i>Bulbophyllum amplifolium</i> | Gongshan  | 1800 | 13.28 | 1738.42 | 78.47 | 860.43  | 0.50 | Epiphyte    | Forest edge   | Non-endemic |

|                                  |          |      |       |         |       |         |      |          |               |             |
|----------------------------------|----------|------|-------|---------|-------|---------|------|----------|---------------|-------------|
| <i>Bulbophyllum amplifolium</i>  | Gongshan | 2000 | 12.08 | 1738.42 | 78.47 | 860.43  | 0.50 | Epiphyte | Dense forest  | Non-endemic |
| <i>Bulbophyllum amplifolium</i>  | Gongshan | 2000 | 12.08 | 1738.42 | 78.47 | 860.43  | 0.50 | Epiphyte | Dense forest  | Non-endemic |
| <i>Bulbophyllum andersonii</i>   | Yanshan  | 1200 | 18.26 | 1003.57 | 79.42 | 1172.21 | 1.17 | Epiphyte | Dense forest  | Non-endemic |
| <i>Bulbophyllum andersonii</i>   | Pingbian | 1400 | 16.42 | 1648.57 | 86.34 | 990.16  | 0.60 | Epiphyte | Dense forest  | Non-endemic |
| <i>Bulbophyllum andersonii</i>   | Menghai  | 1500 | 16.56 | 1314.38 | 80.83 | 1150.91 | 0.88 | Epiphyte | Dense forest  | Non-endemic |
| <i>Bulbophyllum andersonii</i>   | Xichou   | 1500 | 15.93 | 1267.54 | 82.98 | 985.97  | 0.78 | Epiphyte | Dense forest  | Non-endemic |
| <i>Bulbophyllum andersonii</i>   | Xichou   | 1500 | 15.93 | 1267.54 | 82.98 | 985.97  | 0.78 | Epiphyte | Sparse forest | Non-endemic |
| <i>Bulbophyllum andersonii</i>   | Xichou   | 1550 | 15.63 | 1267.54 | 82.98 | 985.97  | 0.78 | Epiphyte | Dense forest  | Non-endemic |
| <i>Bulbophyllum andersonii</i>   | Xichou   | 1550 | 15.63 | 1267.54 | 82.98 | 985.97  | 0.78 | Epiphyte | Sparse forest | Non-endemic |
| <i>Bulbophyllum andersonii</i>   | Xichou   | 1600 | 15.33 | 1267.54 | 82.98 | 985.97  | 0.78 | Epiphyte | Dense forest  | Non-endemic |
| <i>Bulbophyllum andersonii</i>   | Malipo   | 1800 | 13.46 | 1063.54 | 85.83 | 1053.97 | 0.99 | Epiphyte | Dense forest  | Non-endemic |
| <i>Bulbophyllum andersonii</i>   | Malipo   | 2000 | 12.26 | 1063.54 | 85.83 | 1053.97 | 0.99 | Epiphyte | Sparse forest | Non-endemic |
| <i>Bulbophyllum bomiense</i>     | Gongshan | 2700 | 7.88  | 1738.42 | 78.47 | 860.43  | 0.50 | Epiphyte | Dense forest  | Non-endemic |
| <i>Bulbophyllum corallinum</i>   | Jinghong | 1270 | 18.10 | 1161.08 | 80.46 | 1256.19 | 1.08 | Epiphyte | Dense forest  | Non-endemic |
| <i>Bulbophyllum corallinum</i>   | Menghai  | 1500 | 16.56 | 1314.38 | 80.83 | 1150.91 | 0.88 | Epiphyte | Dense forest  | Non-endemic |
| <i>Bulbophyllum corallinum</i>   | Menghai  | 1530 | 16.38 | 1314.38 | 80.83 | 1150.91 | 0.88 | Epiphyte | Dense forest  | Non-endemic |
| <i>Bulbophyllum crassipes</i>    | Menghai  | 1150 | 18.66 | 1314.38 | 80.83 | 1150.91 | 0.88 | Epiphyte | Dense forest  | Non-endemic |
| <i>Bulbophyllum crassipes</i>    | Cangyuan | 1200 | 18.02 | 1733.34 | 81.63 | 1060.82 | 0.61 | Epiphyte | Dense forest  | Non-endemic |
| <i>Bulbophyllum crassipes</i>    | Menghai  | 1300 | 17.76 | 1314.38 | 80.83 | 1150.91 | 0.88 | Epiphyte | Dense forest  | Non-endemic |
| <i>Bulbophyllum crassipes</i>    | Menghai  | 1950 | 13.86 | 1314.38 | 80.83 | 1150.91 | 0.88 | Epiphyte | Sparse forest | Non-endemic |
| <i>Bulbophyllum cylindraceum</i> | Xichou   | 1500 | 15.93 | 1267.54 | 82.98 | 985.97  | 0.78 | Epiphyte | Dense forest  | Non-endemic |
| <i>Bulbophyllum cylindraceum</i> | Malipo   | 1600 | 14.66 | 1063.54 | 85.83 | 1053.97 | 0.99 | Epiphyte | Dense forest  | Non-endemic |
| <i>Bulbophyllum cylindraceum</i> | Zhenkang | 1640 | 15.00 | 1602.96 | 81.14 | 1089.09 | 0.68 | Epiphyte | Dense forest  | Non-endemic |
| <i>Bulbophyllum cylindraceum</i> | Fengqing | 1700 | 16.00 | 1352.80 | 73.24 | 1172.52 | 0.87 | Epiphyte | Forest edge   | Non-endemic |
| <i>Bulbophyllum cylindraceum</i> | Gongshan | 1800 | 13.28 | 1738.42 | 78.47 | 860.43  | 0.50 | Epiphyte | Dense forest  | Non-endemic |
| <i>Bulbophyllum cylindraceum</i> | Gongshan | 1800 | 13.28 | 1738.42 | 78.47 | 860.43  | 0.50 | Epiphyte | Dense forest  | Non-endemic |
| <i>Bulbophyllum cylindraceum</i> | Lushui   | 2200 | 12.85 | 1195.57 | 70.63 | 911.65  | 0.76 | Epiphyte | Dense forest  | Non-endemic |
| <i>Bulbophyllum cylindraceum</i> | Jingdong | 2400 | 11.18 | 1128.40 | 76.80 | 1142.11 | 1.01 | Epiphyte | Dense forest  | Non-endemic |
| <i>Bulbophyllum delitescens</i>  | Yongde   | 2600 | 11.53 | 1266.25 | 69.00 | 1283.63 | 1.01 | Epiphyte | Dense forest  | Non-endemic |
| <i>Bulbophyllum drymoglossum</i> | Xichou   | 1700 | 14.73 | 1267.54 | 82.98 | 985.97  | 0.78 | Epiphyte | Dense forest  | Non-endemic |
| <i>Bulbophyllum drymoglossum</i> | Jingdong | 2400 | 11.18 | 1128.40 | 76.80 | 1142.11 | 1.01 | Epiphyte | Shrubland     | Non-endemic |
| <i>Bulbophyllum elatum</i>       | Gongshan | 2200 | 10.88 | 1738.42 | 78.47 | 860.43  | 0.50 | Epiphyte | Forest edge   | Non-endemic |
| <i>Bulbophyllum emarginatum</i>  | Gongshan | 1200 | 16.88 | 1738.42 | 78.47 | 860.43  | 0.50 | Epiphyte | Dense forest  | Non-endemic |
| <i>Bulbophyllum emarginatum</i>  | Gongshan | 1600 | 14.48 | 1738.42 | 78.47 | 860.43  | 0.50 | Epiphyte | Dense forest  | Non-endemic |
| <i>Bulbophyllum emarginatum</i>  | Gongshan | 1700 | 13.88 | 1738.42 | 78.47 | 860.43  | 0.50 | Epiphyte | Dense forest  | Non-endemic |
| <i>Bulbophyllum emarginatum</i>  | Gongshan | 1900 | 12.68 | 1738.42 | 78.47 | 860.43  | 0.50 | epiphyte | Dense forest  | Non-endemic |

|                                     |          |      |       |         |       |         |      |          |               |             |
|-------------------------------------|----------|------|-------|---------|-------|---------|------|----------|---------------|-------------|
| <i>Bulbophyllum emarginatum</i>     | Gongshan | 2000 | 12.08 | 1738.42 | 78.47 | 860.43  | 0.50 | Epiphyte | Dense forest  | Non-endemic |
| <i>Bulbophyllum eublepharum</i>     | Gongshan | 2080 | 11.60 | 1738.42 | 78.47 | 860.43  | 0.50 | Epiphyte | Dense forest  | Non-endemic |
| <i>Bulbophyllum fooningense</i>     | Funing   | 1000 | 17.62 | 1161.58 | 79.07 | 1147.17 | 0.99 | Epiphyte | Dense forest  | Non-endemic |
| <i>Bulbophyllum fordii</i>          | Jingdong | 1950 | 13.88 | 1128.40 | 76.80 | 1142.11 | 1.01 | Epiphyte | Sparse forest | Non-endemic |
| <i>Bulbophyllum forrestii</i>       | Menghai  | 849  | 20.46 | 1314.38 | 80.83 | 1150.91 | 0.88 | Epiphyte | Dense forest  | Non-endemic |
| <i>Bulbophyllum griffithii</i>      | Xichou   | 1000 | 18.93 | 1267.54 | 82.98 | 985.97  | 0.78 | Epiphyte | Dense forest  | Non-endemic |
| <i>Bulbophyllum griffithii</i>      | Yuxi     | 2000 | 13.77 | 928.04  | 74.41 | 1159.15 | 1.25 | epiphyte | Dense forest  | Non-endemic |
| <i>Bulbophyllum hastatum</i>        | Hekou    | 365  | 21.56 | 1768.58 | 84.25 | 1166.26 | 0.66 | Epiphyte | Dense forest  | Non-endemic |
| <i>Bulbophyllum helenae</i>         | Menghai  | 1800 | 14.76 | 1314.38 | 80.83 | 1150.91 | 0.88 | Epiphyte | Dense forest  | Non-endemic |
| <i>Bulbophyllum helenae</i>         | Jingdong | 1950 | 13.88 | 1128.40 | 76.80 | 1142.11 | 1.01 | Epiphyte | Open site     | Non-endemic |
| <i>Bulbophyllum helenae</i>         | Lushui   | 1980 | 14.17 | 1195.57 | 70.63 | 911.65  | 0.76 | Epiphyte | Forest edge   | Non-endemic |
| <i>Bulbophyllum helenae</i>         | Fengqing | 2300 | 12.40 | 1352.80 | 73.24 | 1172.52 | 0.87 | Epiphyte | Dense forest  | Non-endemic |
| <i>Bulbophyllum insulsum</i>        | Xichou   | 830  | 19.95 | 1267.54 | 82.98 | 985.97  | 0.78 | Epiphyte | Dense forest  | Non-endemic |
| <i>Bulbophyllum insulsum</i>        | Gongshan | 1320 | 16.16 | 1738.42 | 78.47 | 860.43  | 0.50 | Epiphyte | Dense forest  | Non-endemic |
| <i>Bulbophyllum insulsum</i>        | Xichou   | 1460 | 16.17 | 1267.54 | 82.98 | 985.97  | 0.78 | Epiphyte | Dense forest  | Non-endemic |
| <i>Bulbophyllum insulsum</i>        | Gongshan | 1560 | 14.72 | 1738.42 | 78.47 | 860.43  | 0.50 | Epiphyte | Dense forest  | Non-endemic |
| <i>Bulbophyllum kwangtungense</i>   | Yanshan  | 1200 | 18.26 | 1003.57 | 79.42 | 1172.21 | 1.17 | Epiphyte | Dense forest  | Non-endemic |
| <i>Bulbophyllum longibrachiatum</i> | Malipo   | 1600 | 14.66 | 1063.54 | 85.83 | 1053.97 | 0.99 | Epiphyte | Dense forest  | Endemic     |
| <i>Bulbophyllum menghaiense</i>     | Menghai  | 1500 | 16.56 | 1314.38 | 80.83 | 1150.91 | 0.88 | Epiphyte | Shrubland     | Endemic     |
| <i>Bulbophyllum nigrescens</i>      | Yongde   | 1300 | 19.33 | 1266.25 | 69.00 | 1283.63 | 1.01 | Epiphyte | Dense forest  | Non-endemic |
| <i>Bulbophyllum nigrescens</i>      | Mengla   | 1300 | 17.40 | 1514.70 | 84.25 | 1146.68 | 0.76 | Epiphyte | Dense forest  | Non-endemic |
| <i>Bulbophyllum nigrescens</i>      | Lancang  | 1600 | 16.10 | 1596.50 | 77.88 | 1183.80 | 0.74 | epiphyte | Open site     | Non-endemic |
| <i>Bulbophyllum nigrescens</i>      | Lancang  | 1800 | 14.90 | 1596.50 | 77.88 | 1183.80 | 0.74 | Epiphyte | Dense forest  | Non-endemic |
| <i>Bulbophyllum odoratissimum</i>   | Mengla   | 650  | 21.30 | 1514.70 | 84.25 | 1146.68 | 0.76 | Epiphyte | Dense forest  | Non-endemic |
| <i>Bulbophyllum odoratissimum</i>   | Maguan   | 800  | 20.21 | 1330.52 | 83.25 | 1086.43 | 0.82 | Epiphyte | Forest edge   | Non-endemic |
| <i>Bulbophyllum odoratissimum</i>   | Xichou   | 827  | 19.97 | 1267.54 | 82.98 | 985.97  | 0.78 | Epiphyte | Dense forest  | Non-endemic |
| <i>Bulbophyllum odoratissimum</i>   | Menglian | 1000 | 19.58 | 1357.68 | 80.47 | 1185.94 | 0.87 | Epiphyte | Dense forest  | Non-endemic |
| <i>Bulbophyllum odoratissimum</i>   | Menghai  | 1100 | 18.96 | 1314.38 | 80.83 | 1150.91 | 0.88 | Epiphyte | Dense forest  | Non-endemic |
| <i>Bulbophyllum odoratissimum</i>   | Menghai  | 1100 | 18.96 | 1314.38 | 80.83 | 1150.91 | 0.88 | Epiphyte | Dense forest  | Non-endemic |
| <i>Bulbophyllum odoratissimum</i>   | Yanshan  | 1200 | 18.26 | 1003.57 | 79.42 | 1172.21 | 1.17 | Epiphyte | Dense forest  | Non-endemic |
| <i>Bulbophyllum odoratissimum</i>   | Jinghong | 1250 | 18.22 | 1161.08 | 80.46 | 1256.19 | 1.08 | Epiphyte | Dense forest  | Non-endemic |
| <i>Bulbophyllum odoratissimum</i>   | Menghai  | 1340 | 17.52 | 1314.38 | 80.83 | 1150.91 | 0.88 | Epiphyte | Shrubland     | Non-endemic |
| <i>Bulbophyllum odoratissimum</i>   | Xichou   | 1350 | 16.83 | 1267.54 | 82.98 | 985.97  | 0.78 | Epiphyte | Dense forest  | Non-endemic |
| <i>Bulbophyllum odoratissimum</i>   | Jinghong | 1500 | 16.72 | 1161.08 | 80.46 | 1256.19 | 1.08 | Epiphyte | Dense forest  | Non-endemic |
| <i>Bulbophyllum odoratissimum</i>   | Menghai  | 1500 | 16.56 | 1314.38 | 80.83 | 1150.91 | 0.88 | Epiphyte | Dense forest  | Non-endemic |
| <i>Bulbophyllum odoratissimum</i>   | Menghai  | 1540 | 16.32 | 1314.38 | 80.83 | 1150.91 | 0.88 | Epiphyte | Dense forest  | Non-endemic |

|                                     |          |      |       |         |       |         |      |          |              |             |
|-------------------------------------|----------|------|-------|---------|-------|---------|------|----------|--------------|-------------|
| <i>Bulbophyllum odoratissimum</i>   | Menghai  | 1540 | 16.32 | 1314.38 | 80.83 | 1150.91 | 0.88 | Epiphyte | Shrubland    | Non-endemic |
| <i>Bulbophyllum odoratissimum</i>   | Gongshan | 1600 | 14.48 | 1738.42 | 78.47 | 860.43  | 0.50 | Epiphyte | Dense forest | Non-endemic |
| <i>Bulbophyllum odoratissimum</i>   | Gongshan | 1700 | 13.88 | 1738.42 | 78.47 | 860.43  | 0.50 | Epiphyte | Dense forest | Non-endemic |
| <i>Bulbophyllum odoratissimum</i>   | Ruili    | 1700 | 14.80 | 1436.05 | 78.54 | 1237.71 | 0.86 | Epiphyte | Dense forest | Non-endemic |
| <i>Bulbophyllum odoratissimum</i>   | Menghai  | 1760 | 15.00 | 1314.38 | 80.83 | 1150.91 | 0.88 | Epiphyte | Dense forest | Non-endemic |
| <i>Bulbophyllum odoratissimum</i>   | Lancang  | 1800 | 14.90 | 1596.50 | 77.88 | 1183.80 | 0.74 | Epiphyte | Dense forest | Non-endemic |
| <i>Bulbophyllum odoratissimum</i>   | Jingdong | 1800 | 14.78 | 1128.40 | 76.80 | 1142.11 | 1.01 | Epiphyte | Dense forest | Non-endemic |
| <i>Bulbophyllum odoratissimum</i>   | Fugong   | 1800 | 13.26 | 1441.43 | 79.99 | 906.18  | 0.63 | Epiphyte | Dense forest | Non-endemic |
| <i>Bulbophyllum odoratissimum</i>   | Fugong   | 1800 | 13.26 | 1441.43 | 79.99 | 906.18  | 0.63 | Epiphyte | Dense forest | Non-endemic |
| <i>Bulbophyllum odoratissimum</i>   | Jingdong | 2050 | 13.28 | 1128.40 | 76.80 | 1142.11 | 1.01 | Epiphyte | Dense forest | Non-endemic |
| <i>Bulbophyllum odoratissimum</i>   | Lincang  | 2300 | 12.72 | 1165.84 | 72.08 | 1167.73 | 1.00 | Epiphyte | Dense forest | Non-endemic |
| <i>Bulbophyllum odoratissimum</i>   | Jingdong | 2400 | 11.18 | 1128.40 | 76.80 | 1142.11 | 1.01 | Epiphyte | Dense forest | Non-endemic |
| <i>Bulbophyllum otoglossum</i>      | Deqin    | 2600 | 9.57  | 639.48  | 70.85 | 896.66  | 1.40 | Epiphyte | Dense forest | Non-endemic |
| <i>Bulbophyllum pectenvenensis</i>  | Xichou   | 1600 | 15.33 | 1267.54 | 82.98 | 985.97  | 0.78 | Epiphyte | Forest edge  | Non-endemic |
| <i>Bulbophyllum pectinatum</i>      | Pingbian | 1460 | 16.06 | 1648.57 | 86.34 | 990.16  | 0.60 | Epiphyte | Dense forest | Non-endemic |
| <i>Bulbophyllum pectinatum</i>      | Weishan  | 1988 | 14.23 | 812.54  | 70.80 | 1216.02 | 1.50 | Epiphyte | Dense forest | Non-endemic |
| <i>Bulbophyllum psittacoglossum</i> | Xichou   | 1500 | 15.93 | 1267.54 | 82.98 | 985.97  | 0.78 | Epiphyte | Dense forest | Non-endemic |
| <i>Bulbophyllum rassipes</i>        | Jinghong | 860  | 20.56 | 1161.08 | 80.46 | 1256.19 | 1.08 | Epiphyte | Dense forest | Non-endemic |
| <i>Bulbophyllum rassipes</i>        | Menghai  | 1300 | 17.76 | 1314.38 | 80.83 | 1150.91 | 0.88 | Epiphyte | Dense forest | Non-endemic |
| <i>Bulbophyllum rassipes</i>        | Menghai  | 1500 | 16.56 | 1314.38 | 80.83 | 1150.91 | 0.88 | Epiphyte | Dense forest | Non-endemic |
| <i>Bulbophyllum reptans</i>         | Mengla   | 900  | 19.80 | 1514.70 | 84.25 | 1146.68 | 0.76 | Epiphyte | Dense forest | Non-endemic |
| <i>Bulbophyllum reptans</i>         | Malipo   | 1000 | 18.26 | 1063.54 | 85.83 | 1053.97 | 0.99 | Epiphyte | Dense forest | Non-endemic |
| <i>Bulbophyllum reptans</i>         | Malipo   | 1000 | 18.26 | 1063.54 | 85.83 | 1053.97 | 0.99 | Epiphyte | Dense forest | Non-endemic |
| <i>Bulbophyllum reptans</i>         | Hekou    | 1000 | 17.75 | 1768.58 | 84.25 | 1166.26 | 0.66 | Epiphyte | Dense forest | Non-endemic |
| <i>Bulbophyllum reptans</i>         | Xichou   | 1000 | 18.93 | 1267.54 | 82.98 | 985.97  | 0.78 | Epiphyte | Dense forest | Non-endemic |
| <i>Bulbophyllum reptans</i>         | Gongshan | 1300 | 16.28 | 1738.42 | 78.47 | 860.43  | 0.50 | Epiphyte | Dense forest | Non-endemic |
| <i>Bulbophyllum reptans</i>         | Gongshan | 1300 | 16.28 | 1738.42 | 78.47 | 860.43  | 0.50 | Epiphyte | Forest edge  | Non-endemic |
| <i>Bulbophyllum reptans</i>         | Gongshan | 1350 | 15.98 | 1738.42 | 78.47 | 860.43  | 0.50 | Epiphyte | Dense forest | Non-endemic |
| <i>Bulbophyllum reptans</i>         | Gongshan | 1350 | 15.98 | 1738.42 | 78.47 | 860.43  | 0.50 | Epiphyte | Dense forest | Non-endemic |
| <i>Bulbophyllum reptans</i>         | Jingdong | 1350 | 17.48 | 1128.40 | 76.80 | 1142.11 | 1.01 | Epiphyte | Dense forest | Non-endemic |
| <i>Bulbophyllum reptans</i>         | Gongshan | 1360 | 15.92 | 1738.42 | 78.47 | 860.43  | 0.50 | Epiphyte | Dense forest | Non-endemic |
| <i>Bulbophyllum reptans</i>         | Gongshan | 1380 | 15.80 | 1738.42 | 78.47 | 860.43  | 0.50 | Epiphyte | Dense forest | Non-endemic |
| <i>Bulbophyllum reptans</i>         | Gongshan | 1400 | 15.68 | 1738.42 | 78.47 | 860.43  | 0.50 | Epiphyte | Dense forest | Non-endemic |
| <i>Bulbophyllum reptans</i>         | Gongshan | 1400 | 15.68 | 1738.42 | 78.47 | 860.43  | 0.50 | Epiphyte | Dense forest | Non-endemic |
| <i>Bulbophyllum reptans</i>         | Gongshan | 1400 | 15.68 | 1738.42 | 78.47 | 860.43  | 0.50 | Epiphyte | Dense forest | Non-endemic |
| <i>Bulbophyllum reptans</i>         | Gongshan | 1400 | 15.68 | 1738.42 | 78.47 | 860.43  | 0.50 | Epiphyte | Dense forest | Non-endemic |

|                                   |          |      |       |         |       |         |      |          |              |             |
|-----------------------------------|----------|------|-------|---------|-------|---------|------|----------|--------------|-------------|
| <i>Bulbophyllum reptans</i>       | Gongshan | 1450 | 15.38 | 1738.42 | 78.47 | 860.43  | 0.50 | Epiphyte | Dense forest | Non-endemic |
| <i>Bulbophyllum reptans</i>       | Yongde   | 1600 | 17.53 | 1266.25 | 69.00 | 1283.63 | 1.01 | Epiphyte | Dense forest | Non-endemic |
| <i>Bulbophyllum reptans</i>       | Gongshan | 1700 | 13.88 | 1738.42 | 78.47 | 860.43  | 0.50 | Epiphyte | Dense forest | Non-endemic |
| <i>Bulbophyllum reptans</i>       | Malipo   | 1800 | 13.46 | 1063.54 | 85.83 | 1053.97 | 0.99 | Epiphyte | Dense forest | Non-endemic |
| <i>Bulbophyllum reptans</i>       | Gongshan | 1800 | 13.28 | 1738.42 | 78.47 | 860.43  | 0.50 | Epiphyte | Dense forest | Non-endemic |
| <i>Bulbophyllum reptans</i>       | Pingbian | 1850 | 13.72 | 1648.57 | 86.34 | 990.16  | 0.60 | Epiphyte | Dense forest | Non-endemic |
| <i>Bulbophyllum reptans</i>       | Gongshan | 1850 | 12.98 | 1738.42 | 78.47 | 860.43  | 0.50 | Epiphyte | Dense forest | Non-endemic |
| <i>Bulbophyllum reptans</i>       | Pingbian | 1900 | 13.42 | 1648.57 | 86.34 | 990.16  | 0.60 | Epiphyte | Dense forest | Non-endemic |
| <i>Bulbophyllum reptans</i>       | Gongshan | 2000 | 12.08 | 1738.42 | 78.47 | 860.43  | 0.50 | Epiphyte | Dense forest | Non-endemic |
| <i>Bulbophyllum reptans</i>       | Gongshan | 2000 | 12.08 | 1738.42 | 78.47 | 860.43  | 0.50 | Epiphyte | Dense forest | Non-endemic |
| <i>Bulbophyllum reptans</i>       | Gongshan | 2000 | 12.08 | 1738.42 | 78.47 | 860.43  | 0.50 | Epiphyte | Dense forest | Non-endemic |
| <i>Bulbophyllum reptans</i>       | Gongshan | 2000 | 12.08 | 1738.42 | 78.47 | 860.43  | 0.50 | Epiphyte | Dense forest | Non-endemic |
| <i>Bulbophyllum reptans</i>       | Gongshan | 2000 | 12.08 | 1738.42 | 78.47 | 860.43  | 0.50 | Epiphyte | Dense forest | Non-endemic |
| <i>Bulbophyllum reptans</i>       | Gongshan | 2000 | 12.08 | 1738.42 | 78.47 | 860.43  | 0.50 | Epiphyte | Dense forest | Non-endemic |
| <i>Bulbophyllum reptans</i>       | Gongshan | 2030 | 11.90 | 1738.42 | 78.47 | 860.43  | 0.50 | Epiphyte | Dense forest | Non-endemic |
| <i>Bulbophyllum reptans</i>       | Lushui   | 2050 | 13.75 | 1195.57 | 70.63 | 911.65  | 0.76 | Epiphyte | Dense forest | Non-endemic |
| <i>Bulbophyllum reptans</i>       | Gongshan | 2100 | 11.48 | 1738.42 | 78.47 | 860.43  | 0.50 | Epiphyte | Dense forest | Non-endemic |
| <i>Bulbophyllum reptans</i>       | Gongshan | 2100 | 11.48 | 1738.42 | 78.47 | 860.43  | 0.50 | Epiphyte | Dense forest | Non-endemic |
| <i>Bulbophyllum reptans</i>       | Gongshan | 2200 | 10.88 | 1738.42 | 78.47 | 860.43  | 0.50 | Epiphyte | Dense forest | Non-endemic |
| <i>Bulbophyllum reptans</i>       | Jingdong | 2200 | 12.38 | 1128.40 | 76.80 | 1142.11 | 1.01 | Epiphyte | Dense forest | Non-endemic |
| <i>Bulbophyllum reptans</i>       | Jingdong | 2250 | 12.08 | 1128.40 | 76.80 | 1142.11 | 1.01 | Epiphyte | Dense forest | Non-endemic |
| <i>Bulbophyllum reptans</i>       | Jingdong | 2400 | 11.18 | 1128.40 | 76.80 | 1142.11 | 1.01 | Epiphyte | Shrubland    | Non-endemic |
| <i>Bulbophyllum reptans</i>       | Zhenkang | 2450 | 10.14 | 1602.96 | 81.14 | 1089.09 | 0.68 | Epiphyte | Dense forest | Non-endemic |
| <i>Bulbophyllum reptans</i>       | Gongshan | 2500 | 9.08  | 1738.42 | 78.47 | 860.43  | 0.50 | Epiphyte | Dense forest | Non-endemic |
| <i>Bulbophyllum reptans</i>       | Gongshan | 2500 | 9.08  | 1738.42 | 78.47 | 860.43  | 0.50 | Epiphyte | Dense forest | Non-endemic |
| <i>Bulbophyllum reptans</i>       | Lushui   | 2500 | 11.05 | 1195.57 | 70.63 | 911.65  | 0.76 | Epiphyte | Dense forest | Non-endemic |
| <i>Bulbophyllum reptans</i>       | Gongshan | 2650 | 8.18  | 1738.42 | 78.47 | 860.43  | 0.50 | Epiphyte | Dense forest | Non-endemic |
| <i>Bulbophyllum reptans</i>       | Fugong   | 2800 | 7.26  | 1441.43 | 79.99 | 906.18  | 0.63 | Epiphyte | Dense forest | Non-endemic |
| <i>Bulbophyllum reptans</i>       | Lincang  | 2800 | 9.72  | 1165.84 | 72.08 | 1167.73 | 1.00 | Epiphyte | Dense forest | Non-endemic |
| <i>Bulbophyllum retusiusculum</i> | Xichou   | 1600 | 15.33 | 1267.54 | 82.98 | 985.97  | 0.78 | Epiphyte | Dense forest | Non-endemic |
| <i>Bulbophyllum retusiusculum</i> | Xichou   | 1600 | 15.33 | 1267.54 | 82.98 | 985.97  | 0.78 | Epiphyte | Dense forest | Non-endemic |
| <i>Bulbophyllum retusiusculum</i> | Pingbian | 1850 | 13.72 | 1648.57 | 86.34 | 990.16  | 0.60 | Epiphyte | Dense forest | Non-endemic |
| <i>Bulbophyllum retusiusculum</i> | Pingbian | 1850 | 13.72 | 1648.57 | 86.34 | 990.16  | 0.60 | Epiphyte | Dense forest | Non-endemic |
| <i>Bulbophyllum retusiusculum</i> | Pingbian | 1900 | 13.42 | 1648.57 | 86.34 | 990.16  | 0.60 | Epiphyte | Dense forest | Non-endemic |
| <i>Bulbophyllum retusiusculum</i> | Gongshan | 2000 | 12.08 | 1738.42 | 78.47 | 860.43  | 0.50 | Epiphyte | Dense forest | Non-endemic |
| <i>Bulbophyllum retusiusculum</i> | Jingdong | 2000 | 13.58 | 1128.40 | 76.80 | 1142.11 | 1.01 | Epiphyte | Dense forest | Non-endemic |

|                                     |             |      |       |         |       |         |      |          |               |             |
|-------------------------------------|-------------|------|-------|---------|-------|---------|------|----------|---------------|-------------|
| <i>Bulbophyllum retusiusculum</i>   | Fugong      | 2000 | 12.06 | 1441.43 | 79.99 | 906.18  | 0.63 | Epiphyte | Dense forest  | Non-endemic |
| <i>Bulbophyllum retusiusculum</i>   | Luchun      | 2100 | 14.10 | 2013.54 | 78.64 | 1151.56 | 0.57 | Epiphyte | Dense forest  | Non-endemic |
| <i>Bulbophyllum retusiusculum</i>   | Jingdong    | 2200 | 12.38 | 1128.40 | 76.80 | 1142.11 | 1.01 | Epiphyte | Dense forest  | Non-endemic |
| <i>Bulbophyllum retusiusculum</i>   | Tengchong   | 2300 | 11.20 | 1501.45 | 78.06 | 857.93  | 0.57 | Epiphyte | Dense forest  | Non-endemic |
| <i>Bulbophyllum retusiusculum</i>   | Gongshan    | 2400 | 9.68  | 1738.42 | 78.47 | 860.43  | 0.50 | Epiphyte | Dense forest  | Non-endemic |
| <i>Bulbophyllum retusiusculum</i>   | Jingdong    | 2400 | 11.18 | 1128.40 | 76.80 | 1142.11 | 1.01 | Epiphyte | Shrubland     | Non-endemic |
| <i>Bulbophyllum retusiusculum</i>   | Lijiang     | 2420 | 12.55 | 982.53  | 63.24 | 1077.65 | 1.10 | Epiphyte | Sparse forest | Non-endemic |
| <i>Bulbophyllum retusiusculum</i>   | Yongde      | 2470 | 12.31 | 1266.25 | 69.00 | 1283.63 | 1.01 | Epiphyte | Dense forest  | Non-endemic |
| <i>Bulbophyllum retusiusculum</i>   | Yongde      | 2500 | 12.13 | 1266.25 | 69.00 | 1283.63 | 1.01 | Epiphyte | Dense forest  | Non-endemic |
| <i>Bulbophyllum retusiusculum</i>   | Lincang     | 2500 | 11.52 | 1165.84 | 72.08 | 1167.73 | 1.00 | Epiphyte | Dense forest  | Non-endemic |
| <i>Bulbophyllum retusiusculum</i>   | Fugong      | 2500 | 9.06  | 1441.43 | 79.99 | 906.18  | 0.63 | Epiphyte | Open site     | Non-endemic |
| <i>Bulbophyllum retusiusculum</i>   | Fugong      | 2600 | 8.46  | 1441.43 | 79.99 | 906.18  | 0.63 | Epiphyte | Dense forest  | Non-endemic |
| <i>Bulbophyllum retusiusculum</i>   | Yongde      | 2600 | 11.53 | 1266.25 | 69.00 | 1283.63 | 1.01 | Epiphyte | Dense forest  | Non-endemic |
| <i>Bulbophyllum retusiusculum</i>   | Lijiang     | 2640 | 11.23 | 982.53  | 63.24 | 1077.65 | 1.10 | Epiphyte | Dense forest  | Non-endemic |
| <i>Bulbophyllum retusiusculum</i>   | Lijiang     | 2650 | 11.17 | 982.53  | 63.24 | 1077.65 | 1.10 | Epiphyte | Dense forest  | Non-endemic |
| <i>Bulbophyllum retusiusculum</i>   | Lincang     | 2700 | 10.32 | 1165.84 | 72.08 | 1167.73 | 1.00 | Epiphyte | Dense forest  | Non-endemic |
| <i>Bulbophyllum retusiusculum</i>   | Lincang     | 2800 | 9.72  | 1165.84 | 72.08 | 1167.73 | 1.00 | Epiphyte | Dense forest  | Non-endemic |
| <i>Bulbophyllum retusiusculum</i>   | Gongshan    | 3648 | 2.19  | 1738.42 | 78.47 | 860.43  | 0.50 | Epiphyte | Dense forest  | Non-endemic |
| <i>Bulbophyllum rothschildianum</i> | Jinghong    | 1550 | 16.42 | 1161.08 | 80.46 | 1256.19 | 1.08 | Epiphyte | Dense forest  | Non-endemic |
| <i>Bulbophyllum rothschildianum</i> | Shuangjiang | 1600 | 16.38 | 1006.64 | 75.26 | 1272.13 | 1.26 | Epiphyte | Dense forest  | non-endemic |
| <i>Bulbophyllum rufinum</i>         | Mengla      | 850  | 20.10 | 1514.70 | 84.25 | 1146.68 | 0.76 | Epiphyte | Forest edge   | Non-endemic |
| <i>Bulbophyllum shanicum</i>        | Lincang     | 1850 | 15.42 | 1165.84 | 72.08 | 1167.73 | 1.00 | Epiphyte | Dense forest  | Non-endemic |
| <i>Bulbophyllum shweliense</i>      | Gongshan    | 1300 | 16.28 | 1738.42 | 78.47 | 860.43  | 0.50 | Epiphyte | Dense forest  | Endemic     |
| <i>Bulbophyllum shweliense</i>      | Gongshan    | 1400 | 15.68 | 1738.42 | 78.47 | 860.43  | 0.50 | Epiphyte | Dense forest  | Endemic     |
| <i>Bulbophyllum shweliense</i>      | Gongshan    | 1500 | 15.08 | 1738.42 | 78.47 | 860.43  | 0.50 | Epiphyte | Dense forest  | Endemic     |
| <i>Bulbophyllum shweliense</i>      | Menghai     | 1760 | 15.00 | 1314.38 | 80.83 | 1150.91 | 0.88 | Epiphyte | Dense forest  | Endemic     |
| <i>Bulbophyllum spathulatum</i>     | Jinghong    | 860  | 20.56 | 1161.08 | 80.46 | 1256.19 | 1.08 | Epiphyte | Dense forest  | Non-endemic |
| <i>Bulbophyllum stenobulbon</i>     | Xichou      | 830  | 19.95 | 1267.54 | 82.98 | 985.97  | 0.78 | Epiphyte | Dense forest  | Non-endemic |
| <i>Bulbophyllum sutepense</i>       | Menghai     | 1530 | 16.38 | 1314.38 | 80.83 | 1150.91 | 0.88 | Epiphyte | Dense forest  | Non-endemic |
| <i>Bulbophyllum sutepense</i>       | Menghai     | 1550 | 16.26 | 1314.38 | 80.83 | 1150.91 | 0.88 | Epiphyte | Dense forest  | Non-endemic |
| <i>Bulbophyllum sutepense</i>       | Jingdong    | 2400 | 11.18 | 1128.40 | 76.80 | 1142.11 | 1.01 | Epiphyte | Dense forest  | Non-endemic |
| <i>Bulbophyllum tengchongense</i>   | Yongde      | 1700 | 16.93 | 1266.25 | 69.00 | 1283.63 | 1.01 | Epiphyte | Dense forest  | Endemic     |
| <i>Bulbophyllum umbellatum</i>      | Menghai     | 1530 | 16.38 | 1314.38 | 80.83 | 1150.91 | 0.88 | Epiphyte | Dense forest  | Non-endemic |
| <i>Bulbophyllum umbellatum</i>      | Menghai     | 1550 | 16.26 | 1314.38 | 80.83 | 1150.91 | 0.88 | Epiphyte | Dense forest  | Non-endemic |
| <i>Bulbophyllum umbellatum</i>      | Gongshan    | 1800 | 13.28 | 1738.42 | 78.47 | 860.43  | 0.50 | Epiphyte | Dense forest  | Non-endemic |
| <i>Bulbophyllum umbellatum</i>      | Gongshan    | 2000 | 12.08 | 1738.42 | 78.47 | 860.43  | 0.50 | Epiphyte | Sparse forest | Non-endemic |



|                                |           |      |       |         |       |         |      |          |               |             |
|--------------------------------|-----------|------|-------|---------|-------|---------|------|----------|---------------|-------------|
| <i>Bulbophyllum umbellatum</i> | Fengqing  | 2200 | 13.00 | 1352.80 | 73.24 | 1172.52 | 0.87 | Epiphyte | Dense forest  | Non-endemic |
| <i>Bulbophyllum umbellatum</i> | Jingdong  | 2400 | 11.18 | 1128.40 | 76.80 | 1142.11 | 1.01 | Epiphyte | Dense forest  | Non-endemic |
| <i>Bulbophyllum wallichii</i>  | Longchuan | 1600 | 14.95 | 1604.50 | 80.46 | 1149.57 | 0.72 | Epiphyte | Dense forest  | Non-endemic |
| <i>Bulleyia yunnanensis</i>    | Funing    | 700  | 19.42 | 1161.58 | 79.07 | 1147.17 | 0.99 | Epiphyte | Open site     | Endemic     |
| <i>Bulleyia yunnanensis</i>    | Funing    | 750  | 19.12 | 1161.58 | 79.07 | 1147.17 | 0.99 | Epiphyte | Sparse forest | Endemic     |
| <i>Bulleyia yunnanensis</i>    | Malipo    | 1000 | 18.26 | 1063.54 | 85.83 | 1053.97 | 0.99 | Epiphyte | Dense forest  | Endemic     |
| <i>Bulleyia yunnanensis</i>    | Gongshan  | 1240 | 16.64 | 1738.42 | 78.47 | 860.43  | 0.50 | Epiphyte | Dense forest  | Endemic     |
| <i>Bulleyia yunnanensis</i>    | Dali      | 1300 | 19.02 | 1082.70 | 68.61 | 1256.27 | 1.16 | Epiphyte | Dense forest  | Endemic     |
| <i>Bulleyia yunnanensis</i>    | Gongshan  | 1350 | 15.98 | 1738.42 | 78.47 | 860.43  | 0.50 | Epiphyte | Dense forest  | Endemic     |
| <i>Bulleyia yunnanensis</i>    | Jingdong  | 1370 | 17.36 | 1128.40 | 76.80 | 1142.11 | 1.01 | Epiphyte | Dense forest  | Endemic     |
| <i>Bulleyia yunnanensis</i>    | Gongshan  | 1380 | 15.80 | 1738.42 | 78.47 | 860.43  | 0.50 | Epiphyte | Dense forest  | Endemic     |
| <i>Bulleyia yunnanensis</i>    | Pingbian  | 1600 | 15.22 | 1648.57 | 86.34 | 990.16  | 0.60 | Epiphyte | Dense forest  | Endemic     |
| <i>Bulleyia yunnanensis</i>    | Gongshan  | 1620 | 14.36 | 1738.42 | 78.47 | 860.43  | 0.50 | Epiphyte | Dense forest  | Endemic     |
| <i>Bulleyia yunnanensis</i>    | Gongshan  | 1690 | 13.94 | 1738.42 | 78.47 | 860.43  | 0.50 | Epiphyte | Dense forest  | Endemic     |
| <i>Bulleyia yunnanensis</i>    | Gongshan  | 1850 | 12.98 | 1738.42 | 78.47 | 860.43  | 0.50 | Epiphyte | Dense forest  | Endemic     |
| <i>Bulleyia yunnanensis</i>    | Jingdong  | 1900 | 14.18 | 1128.40 | 76.80 | 1142.11 | 1.01 | Epiphyte | Dense forest  | Endemic     |
| <i>Bulleyia yunnanensis</i>    | Luchun    | 1900 | 15.30 | 2013.54 | 78.64 | 1151.56 | 0.57 | Epiphyte | Dense forest  | Endemic     |
| <i>Bulleyia yunnanensis</i>    | Gongshan  | 1900 | 12.68 | 1738.42 | 78.47 | 860.43  | 0.50 | Epiphyte | Forest edge   | Endemic     |
| <i>Bulleyia yunnanensis</i>    | Gongshan  | 1915 | 12.59 | 1738.42 | 78.47 | 860.43  | 0.50 | Epiphyte | Dense forest  | Endemic     |
| <i>Bulleyia yunnanensis</i>    | Jingdong  | 1950 | 13.88 | 1128.40 | 76.80 | 1142.11 | 1.01 | Epiphyte | Dense forest  | Endemic     |
| <i>Bulleyia yunnanensis</i>    | Hekou     | 1950 | 12.05 | 1768.58 | 84.25 | 1166.26 | 0.66 | Epiphyte | Dense forest  | Endemic     |
| <i>Bulleyia yunnanensis</i>    | Gongshan  | 2000 | 12.08 | 1738.42 | 78.47 | 860.43  | 0.50 | Epiphyte | Dense forest  | Endemic     |
| <i>Bulleyia yunnanensis</i>    | Gongshan  | 2000 | 12.08 | 1738.42 | 78.47 | 860.43  | 0.50 | Epiphyte | Dense forest  | Endemic     |
| <i>Bulleyia yunnanensis</i>    | Jingdong  | 2000 | 13.58 | 1128.40 | 76.80 | 1142.11 | 1.01 | Epiphyte | Dense forest  | Endemic     |
| <i>Bulleyia yunnanensis</i>    | Fuming    | 2000 | 13.97 | 871.62  | 71.93 | 1209.56 | 1.39 | Epiphyte | Dense forest  | Endemic     |
| <i>Bulleyia yunnanensis</i>    | Gongshan  | 2000 | 12.08 | 1738.42 | 78.47 | 860.43  | 0.50 | Epiphyte | Forest edge   | Endemic     |
| <i>Bulleyia yunnanensis</i>    | Weixi     | 2015 | 13.34 | 970.70  | 69.95 | 1021.03 | 1.05 | Epiphyte | Dense forest  | Endemic     |
| <i>Bulleyia yunnanensis</i>    | Gongshan  | 2300 | 10.28 | 1738.42 | 78.47 | 860.43  | 0.50 | Epiphyte | Dense forest  | Endemic     |
| <i>Bulleyia yunnanensis</i>    | Yongde    | 2340 | 13.09 | 1266.25 | 69.00 | 1283.63 | 1.01 | Epiphyte | Open site     | Endemic     |
| <i>Bulleyia yunnanensis</i>    | Yongde    | 2340 | 13.09 | 1266.25 | 69.00 | 1283.63 | 1.01 | Epiphyte | Sparse forest | Endemic     |
| <i>Bulleyia yunnanensis</i>    | Yangbi    | 2490 | 11.05 | 1044.23 | 72.19 | 1161.15 | 1.11 | Epiphyte | Dense forest  | Endemic     |
| <i>Bulleyia yunnanensis</i>    | Weixi     | 2500 | 10.43 | 970.70  | 69.95 | 1021.03 | 1.05 | Epiphyte | Dense forest  | Endemic     |
| <i>Bulleyia yunnanensis</i>    | Lincang   | 2500 | 11.52 | 1165.84 | 72.08 | 1167.73 | 1.00 | Epiphyte | Dense forest  | Endemic     |
| <i>Bulleyia yunnanensis</i>    | Lincang   | 2500 | 11.52 | 1165.84 | 72.08 | 1167.73 | 1.00 | Epiphyte | Dense forest  | Endemic     |
| <i>Bulleyia yunnanensis</i>    | Fugong    | 2500 | 9.06  | 1441.43 | 79.99 | 906.18  | 0.63 | Epiphyte | Dense forest  | Endemic     |
| <i>Bulleyia yunnanensis</i>    | Fugong    | 2700 | 7.86  | 1441.43 | 79.99 | 906.18  | 0.63 | Epiphyte | Dense forest  | Endemic     |

|                                  |           |      |       |         |       |         |      |             |              |             |
|----------------------------------|-----------|------|-------|---------|-------|---------|------|-------------|--------------|-------------|
| <i>Calanthe alismaefolia</i>     | Pingbian  | 1100 | 18.22 | 1648.57 | 86.34 | 990.16  | 0.60 | Terrestrial | Dense forest | Non-endemic |
| <i>Calanthe alismaefolia</i>     | Hekou     | 1280 | 16.07 | 1768.58 | 84.25 | 1166.26 | 0.66 | Terrestrial | Dense forest | Non-endemic |
| <i>Calanthe alismaefolia</i>     | Xichou    | 1400 | 16.53 | 1267.54 | 82.98 | 985.97  | 0.78 | Terrestrial | Shrubland    | Non-endemic |
| <i>Calanthe alismaefolia</i>     | Cangyuan  | 1450 | 16.52 | 1733.34 | 81.63 | 1060.82 | 0.61 | Terrestrial | Dense forest | Non-endemic |
| <i>Calanthe alismaefolia</i>     | Gongshan  | 1600 | 14.48 | 1738.42 | 78.47 | 860.43  | 0.50 | Terrestrial | Dense forest | Non-endemic |
| <i>Calanthe alismaefolia</i>     | Gongshan  | 1700 | 13.88 | 1738.42 | 78.47 | 860.43  | 0.50 | Terrestrial | Dense forest | Non-endemic |
| <i>Calanthe alismaefolia</i>     | Gongshan  | 1700 | 13.88 | 1738.42 | 78.47 | 860.43  | 0.50 | Terrestrial | Forest edge  | Non-endemic |
| <i>Calanthe alismaefolia</i>     | Gongshan  | 2000 | 12.08 | 1738.42 | 78.47 | 860.43  | 0.50 | Terrestrial | Dense forest | Non-endemic |
| <i>Calanthe alismaefolia</i>     | Jingdong  | 2100 | 12.98 | 1128.40 | 76.80 | 1142.11 | 1.01 | Terrestrial | Dense forest | Non-endemic |
| <i>Calanthe alpina</i>           | Lijiang   | 2450 | 12.37 | 982.53  | 63.24 | 1077.65 | 1.10 | Terrestrial | Forest edge  | Non-endemic |
| <i>Calanthe alpina</i>           | Yangbi    | 2498 | 11.00 | 1044.23 | 72.19 | 1161.15 | 1.11 | Terrestrial | Dense forest | Non-endemic |
| <i>Calanthe alpina</i>           | Gongshan  | 2500 | 9.08  | 1738.42 | 78.47 | 860.43  | 0.50 | Terrestrial | Dense forest | Non-endemic |
| <i>Calanthe alpina</i>           | Gongshan  | 2500 | 9.08  | 1738.42 | 78.47 | 860.43  | 0.50 | Terrestrial | Forest edge  | Non-endemic |
| <i>Calanthe alpina</i>           | Yangbi    | 2600 | 10.39 | 1044.23 | 72.19 | 1161.15 | 1.11 | Terrestrial | Dense forest | Non-endemic |
| <i>Calanthe alpina</i>           | Yangbi    | 2700 | 9.79  | 1044.23 | 72.19 | 1161.15 | 1.11 | Terrestrial | Dense forest | Non-endemic |
| <i>Calanthe alpina</i>           | Yongde    | 2820 | 10.21 | 1266.25 | 69.00 | 1283.63 | 1.01 | Terrestrial | Forest edge  | Non-endemic |
| <i>Calanthe alpina</i>           | Dongchuan | 2900 | 8.43  | 1021.73 | 71.65 | 1186.61 | 1.16 | Terrestrial | Forest edge  | Non-endemic |
| <i>Calanthe alpina</i>           | Dayao     | 3100 | 8.33  | 810.80  | 65.01 | 1427.38 | 1.76 | Terrestrial | Dense forest | Non-endemic |
| <i>Calanthe alpina</i>           | Zhongdian | 3100 | 6.84  | 641.73  | 69.05 | 914.89  | 1.43 | Terrestrial | Dense forest | Non-endemic |
| <i>Calanthe alpina</i>           | Zhongdian | 3400 | 5.04  | 641.73  | 69.05 | 914.89  | 1.43 | Terrestrial | Dense forest | Non-endemic |
| <i>Calanthe alpina</i>           | Zhongdian | 3450 | 4.74  | 641.73  | 69.05 | 914.89  | 1.43 | Terrestrial | Dense forest | Non-endemic |
| <i>Calanthe alpina</i>           | Weixi     | 3500 | 4.43  | 970.70  | 69.95 | 1021.03 | 1.05 | Terrestrial | Forest edge  | Non-endemic |
| <i>Calanthe arcuata</i>          | Gongshan  | 2200 | 10.88 | 1738.42 | 78.47 | 860.43  | 0.50 | Terrestrial | Dense forest | Non-endemic |
| <i>Calanthe arcuata</i>          | Yongde    | 2360 | 12.97 | 1266.25 | 69.00 | 1283.63 | 1.01 | Terrestrial | Grassy slope | Non-endemic |
| <i>Calanthe arcuata</i>          | Qiaojia   | 2600 | 8.02  | 878.15  | 76.01 | 1034.97 | 1.18 | Terrestrial | Grassy slope | Non-endemic |
| <i>Calanthe arcuata</i>          | Gongshan  | 3100 | 5.48  | 1738.42 | 78.47 | 860.43  | 0.50 | Terrestrial | Dense forest | Non-endemic |
| <i>Calanthe argenteo-striata</i> | Malipo    | 1000 | 18.26 | 1063.54 | 85.83 | 1053.97 | 0.99 | Terrestrial | Dense forest | Non-endemic |
| <i>Calanthe biloba</i>           | Jingdong  | 1800 | 14.78 | 1128.40 | 76.80 | 1142.11 | 1.01 | Terrestrial | Shrubland    | Non-endemic |
| <i>Calanthe brevicornu</i>       | Gongshan  | 1880 | 12.80 | 1738.42 | 78.47 | 860.43  | 0.50 | Terrestrial | Dense forest | Non-endemic |
| <i>Calanthe brevicornu</i>       | Gongshan  | 2000 | 12.08 | 1738.42 | 78.47 | 860.43  | 0.50 | Terrestrial | Dense forest | Non-endemic |
| <i>Calanthe brevicornu</i>       | Gongshan  | 2000 | 12.08 | 1738.42 | 78.47 | 860.43  | 0.50 | Terrestrial | Dense forest | Non-endemic |
| <i>Calanthe brevicornu</i>       | Gongshan  | 2300 | 10.28 | 1738.42 | 78.47 | 860.43  | 0.50 | Terrestrial | Dense forest | Non-endemic |
| <i>Calanthe brevicornu</i>       | Gongshan  | 2300 | 10.28 | 1738.42 | 78.47 | 860.43  | 0.50 | Terrestrial | Dense forest | Non-endemic |
| <i>Calanthe brevicornu</i>       | Weixi     | 2300 | 11.63 | 970.70  | 69.95 | 1021.03 | 1.05 | Terrestrial | Forest edge  | Non-endemic |
| <i>Calanthe brevicornu</i>       | Weixi     | 2300 | 11.63 | 970.70  | 69.95 | 1021.03 | 1.05 | Terrestrial | Forest edge  | Non-endemic |
| <i>Calanthe brevicornu</i>       | Tengchong | 2400 | 10.60 | 1501.45 | 78.06 | 857.93  | 0.57 | Terrestrial | Dense forest | Non-endemic |

|                            |           |      |       |         |       |         |      |             |               |             |
|----------------------------|-----------|------|-------|---------|-------|---------|------|-------------|---------------|-------------|
| <i>Calanthe brevicornu</i> | Lushui    | 2400 | 11.65 | 1195.57 | 70.63 | 911.65  | 0.76 | Terrestrial | Forest edge   | Non-endemic |
| <i>Calanthe brevicornu</i> | Yangbi    | 2498 | 11.00 | 1044.23 | 72.19 | 1161.15 | 1.11 | Terrestrial | Dense forest  | Non-endemic |
| <i>Calanthe brevicornu</i> | Weixi     | 2500 | 10.43 | 970.70  | 69.95 | 1021.03 | 1.05 | Terrestrial | Dense forest  | Non-endemic |
| <i>Calanthe brevicornu</i> | Yongde    | 2600 | 11.53 | 1266.25 | 69.00 | 1283.63 | 1.01 | Terrestrial | Forest edge   | Non-endemic |
| <i>Calanthe brevicornu</i> | Yongde    | 2600 | 11.53 | 1266.25 | 69.00 | 1283.63 | 1.01 | Terrestrial | Forest edge   | Non-endemic |
| <i>Calanthe brevicornu</i> | Luquan    | 2600 | 10.12 | 965.09  | 73.60 | 1160.89 | 1.20 | Terrestrial | Shrubland     | Non-endemic |
| <i>Calanthe brevicornu</i> | Weixi     | 2800 | 8.63  | 970.70  | 69.95 | 1021.03 | 1.05 | Terrestrial | Dense forest  | Non-endemic |
| <i>Calanthe brevicornu</i> | Weixi     | 2800 | 8.63  | 970.70  | 69.95 | 1021.03 | 1.05 | Terrestrial | Dense forest  | Non-endemic |
| <i>Calanthe brevicornu</i> | Weixi     | 2800 | 8.63  | 970.70  | 69.95 | 1021.03 | 1.05 | Terrestrial | Dense forest  | Non-endemic |
| <i>Calanthe brevicornu</i> | Jingdong  | 2800 | 8.78  | 1128.40 | 76.80 | 1142.11 | 1.01 | Terrestrial | Dense forest  | Non-endemic |
| <i>Calanthe clavata</i>    | Malipo    | 750  | 19.76 | 1063.54 | 85.83 | 1053.97 | 0.99 | Terrestrial | Dense forest  | Non-endemic |
| <i>Calanthe clavata</i>    | Malipo    | 1000 | 18.26 | 1063.54 | 85.83 | 1053.97 | 0.99 | Terrestrial | Dense forest  | Non-endemic |
| <i>Calanthe davidii</i>    | Xichou    | 830  | 19.95 | 1267.54 | 82.98 | 985.97  | 0.78 | Terrestrial | Dense forest  | Non-endemic |
| <i>Calanthe davidii</i>    | Xichou    | 850  | 19.83 | 1267.54 | 82.98 | 985.97  | 0.78 | Terrestrial | Dense forest  | Non-endemic |
| <i>Calanthe davidii</i>    | Luoping   | 1300 | 16.24 | 1686.24 | 82.51 | 1040.03 | 0.62 | Terrestrial | Dense forest  | Non-endemic |
| <i>Calanthe davidii</i>    | Gongshan  | 1330 | 16.10 | 1738.42 | 78.47 | 860.43  | 0.50 | Terrestrial | Dense forest  | Non-endemic |
| <i>Calanthe davidii</i>    | Gongshan  | 1350 | 15.98 | 1738.42 | 78.47 | 860.43  | 0.50 | Terrestrial | Dense forest  | Non-endemic |
| <i>Calanthe davidii</i>    | Pingbian  | 1400 | 16.42 | 1648.57 | 86.34 | 990.16  | 0.60 | Terrestrial | Dense forest  | Non-endemic |
| <i>Calanthe davidii</i>    | Pingbian  | 1700 | 14.62 | 1648.57 | 86.34 | 990.16  | 0.60 | Terrestrial | Dense forest  | Non-endemic |
| <i>Calanthe davidii</i>    | Gongshan  | 1800 | 13.28 | 1738.42 | 78.47 | 860.43  | 0.50 | Terrestrial | Dense forest  | Non-endemic |
| <i>Calanthe davidii</i>    | Kunming   | 1900 | 14.88 | 1019.14 | 72.30 | 1197.62 | 1.18 | Terrestrial | Dense forest  | Non-endemic |
| <i>Calanthe davidii</i>    | Malipo    | 1900 | 12.86 | 1063.54 | 85.83 | 1053.97 | 0.99 | Terrestrial | Sparse forest | Non-endemic |
| <i>Calanthe davidii</i>    | Longling  | 2000 | 12.12 | 2098.66 | 84.65 | 973.45  | 0.46 | Terrestrial | Dense forest  | Non-endemic |
| <i>Calanthe davidii</i>    | Gongshan  | 2000 | 12.08 | 1738.42 | 78.47 | 860.43  | 0.50 | Terrestrial | Dense forest  | Non-endemic |
| <i>Calanthe davidii</i>    | Pingbian  | 2200 | 11.62 | 1648.57 | 86.34 | 990.16  | 0.60 | Terrestrial | Dense forest  | Non-endemic |
| <i>Calanthe davidii</i>    | Fuyuan    | 2200 | 11.67 | 1084.02 | 74.80 | 1096.10 | 1.01 | Terrestrial | Shrubland     | Non-endemic |
| <i>Calanthe davidii</i>    | Yangbi    | 2280 | 12.31 | 1044.23 | 72.19 | 1161.15 | 1.11 | Terrestrial | Dense forest  | Non-endemic |
| <i>Calanthe davidii</i>    | Lushui    | 2400 | 11.65 | 1195.57 | 70.63 | 911.65  | 0.76 | Terrestrial | Dense forest  | Non-endemic |
| <i>Calanthe davidii</i>    | Weixi     | 2400 | 11.03 | 970.70  | 69.95 | 1021.03 | 1.05 | Terrestrial | Forest edge   | Non-endemic |
| <i>Calanthe davidii</i>    | Gongshan  | 3000 | 6.08  | 1738.42 | 78.47 | 860.43  | 0.50 | Terrestrial | Dense forest  | Non-endemic |
| <i>Calanthe delavayi</i>   | Jingdong  | 2600 | 9.98  | 1128.40 | 76.80 | 1142.11 | 1.01 | Terrestrial | Dense forest  | Non-endemic |
| <i>Calanthe delavayi</i>   | Lijiang   | 2800 | 10.27 | 982.53  | 63.24 | 1077.65 | 1.10 | Terrestrial | Dense forest  | Non-endemic |
| <i>Calanthe delavayi</i>   | Lijiang   | 2850 | 9.97  | 982.53  | 63.24 | 1077.65 | 1.10 | Terrestrial | Forest edge   | Non-endemic |
| <i>Calanthe delavayi</i>   | Zhongdian | 3150 | 6.54  | 641.73  | 69.05 | 914.89  | 1.43 | Terrestrial | Meadow        | Non-endemic |
| <i>Calanthe delavayi</i>   | Lijiang   | 3300 | 7.27  | 982.53  | 63.24 | 1077.65 | 1.10 | Terrestrial | Dense forest  | Non-endemic |
| <i>Calanthe delavayi</i>   | Zhongdian | 3300 | 5.64  | 641.73  | 69.05 | 914.89  | 1.43 | Terrestrial | Forest edge   | Non-endemic |

|                              |           |      |       |         |       |         |      |             |               |             |
|------------------------------|-----------|------|-------|---------|-------|---------|------|-------------|---------------|-------------|
| <i>Calanthe delavayi</i>     | Lijiang   | 3300 | 7.27  | 982.53  | 63.24 | 1077.65 | 1.10 | Terrestrial | Sparse forest | Non-endemic |
| <i>Calanthe delavayi</i>     | Zhongdian | 3500 | 4.44  | 641.73  | 69.05 | 914.89  | 1.43 | Terrestrial | Dense forest  | Non-endemic |
| <i>Calanthe densiflora</i>   | Mengla    | 800  | 20.40 | 1514.70 | 84.25 | 1146.68 | 0.76 | Terrestrial | Dense forest  | Non-endemic |
| <i>Calanthe densiflora</i>   | Xichou    | 1300 | 17.13 | 1267.54 | 82.98 | 985.97  | 0.78 | Terrestrial | Dense forest  | Non-endemic |
| <i>Calanthe densiflora</i>   | Malipo    | 1500 | 15.26 | 1063.54 | 85.83 | 1053.97 | 0.99 | Terrestrial | Dense forest  | Non-endemic |
| <i>Calanthe densiflora</i>   | Xichou    | 1550 | 15.63 | 1267.54 | 82.98 | 985.97  | 0.78 | Terrestrial | Dense forest  | Non-endemic |
| <i>Calanthe densiflora</i>   | Pingbian  | 1680 | 14.74 | 1648.57 | 86.34 | 990.16  | 0.60 | Terrestrial | Dense forest  | Non-endemic |
| <i>Calanthe densiflora</i>   | Gongshan  | 1700 | 13.88 | 1738.42 | 78.47 | 860.43  | 0.50 | Terrestrial | Dense forest  | Non-endemic |
| <i>Calanthe densiflora</i>   | Gongshan  | 2100 | 11.48 | 1738.42 | 78.47 | 860.43  | 0.50 | Terrestrial | Dense forest  | Non-endemic |
| <i>Calanthe densiflora</i>   | Fugong    | 2100 | 11.46 | 1441.43 | 79.99 | 906.18  | 0.63 | Terrestrial | Dense forest  | Non-endemic |
| <i>Calanthe densiflora</i>   | Gongshan  | 2300 | 10.28 | 1738.42 | 78.47 | 860.43  | 0.50 | Terrestrial | Shrubland     | Non-endemic |
| <i>Calanthe densiflora</i>   | Weixi     | 2500 | 10.43 | 970.70  | 69.95 | 1021.03 | 1.05 | Terrestrial | Dense forest  | Non-endemic |
| <i>Calanthe densiflora</i>   | Fugong    | 2800 | 7.26  | 1441.43 | 79.99 | 906.18  | 0.63 | Terrestrial | Dense forest  | Non-endemic |
| <i>Calanthe densiflora</i>   | Fugong    | 2800 | 7.26  | 1441.43 | 79.99 | 906.18  | 0.63 | terrestrial | Dense forest  | Non-endemic |
| <i>Calanthe graciliflora</i> | Longling  | 1700 | 13.92 | 2098.66 | 84.65 | 973.45  | 0.46 | Terrestrial | Shrubland     | Non-endemic |
| <i>Calanthe graciliflora</i> | Jingdong  | 2400 | 11.18 | 1128.40 | 76.80 | 1142.11 | 1.01 | Terrestrial | Dense forest  | Non-endemic |
| <i>Calanthe hancockii</i>    | Funing    | 1000 | 17.62 | 1161.58 | 79.07 | 1147.17 | 0.99 | Terrestrial | Dense forest  | Non-endemic |
| <i>Calanthe hancockii</i>    | Guangnan  | 1340 | 16.21 | 1044.26 | 78.94 | 1090.35 | 1.04 | Terrestrial | Grassy slope  | Non-endemic |
| <i>Calanthe hancockii</i>    | Jingdong  | 1600 | 15.98 | 1128.40 | 76.80 | 1142.11 | 1.01 | Terrestrial | Dense forest  | Non-endemic |
| <i>Calanthe hancockii</i>    | Guangnan  | 1600 | 14.65 | 1044.26 | 78.94 | 1090.35 | 1.04 | Terrestrial | Dense forest  | Non-endemic |
| <i>Calanthe hancockii</i>    | Pingbian  | 1900 | 13.42 | 1648.57 | 86.34 | 990.16  | 0.60 | Terrestrial | Dense forest  | Non-endemic |
| <i>Calanthe hancockii</i>    | Jingdong  | 1960 | 13.82 | 1128.40 | 76.80 | 1142.11 | 1.01 | Terrestrial | Dense forest  | Non-endemic |
| <i>Calanthe hancockii</i>    | Weixi     | 2000 | 13.43 | 970.70  | 69.95 | 1021.03 | 1.05 | Terrestrial | Dense forest  | Non-endemic |
| <i>Calanthe hancockii</i>    | Gongshan  | 2000 | 12.08 | 1738.42 | 78.47 | 860.43  | 0.50 | Terrestrial | Forest edge   | Non-endemic |
| <i>Calanthe hancockii</i>    | Shuangbai | 2040 | 14.64 | 942.53  | 72.21 | 1300.52 | 1.38 | Terrestrial | Dense forest  | Non-endemic |
| <i>Calanthe hancockii</i>    | Qiaojia   | 2100 | 11.02 | 878.15  | 76.01 | 1034.97 | 1.18 | Terrestrial | Dense forest  | Non-endemic |
| <i>Calanthe hancockii</i>    | Gongshan  | 2300 | 10.28 | 1738.42 | 78.47 | 860.43  | 0.50 | Terrestrial | Dense forest  | Non-endemic |
| <i>Calanthe hancockii</i>    | Wenshan   | 2500 | 10.66 | 988.87  | 76.70 | 1272.98 | 1.29 | Terrestrial | Dense forest  | Non-endemic |
| <i>Calanthe hancockii</i>    | Weixi     | 2600 | 9.83  | 970.70  | 69.95 | 1021.03 | 1.05 | Terrestrial | Dense forest  | Non-endemic |
| <i>Calanthe hancockii</i>    | Weixi     | 2600 | 9.83  | 970.70  | 69.95 | 1021.03 | 1.05 | Terrestrial | Dense forest  | Non-endemic |
| <i>Calanthe hancockii</i>    | Weixi     | 2600 | 9.83  | 970.70  | 69.95 | 1021.03 | 1.05 | Terrestrial | Dense forest  | Non-endemic |
| <i>Calanthe hancockii</i>    | Jingdong  | 2600 | 9.98  | 1128.40 | 76.80 | 1142.11 | 1.01 | Terrestrial | Dense forest  | Non-endemic |
| <i>Calanthe hancockii</i>    | Weixi     | 2700 | 9.23  | 970.70  | 69.95 | 1021.03 | 1.05 | Terrestrial | Dense forest  | Non-endemic |
| <i>Calanthe hancockii</i>    | Weixi     | 2800 | 8.63  | 970.70  | 69.95 | 1021.03 | 1.05 | Terrestrial | Dense forest  | Non-endemic |
| <i>Calanthe hancockii</i>    | Gongshan  | 2800 | 7.28  | 1738.42 | 78.47 | 860.43  | 0.50 | Terrestrial | Dense forest  | Non-endemic |
| <i>Calanthe hancockii</i>    | Weixi     | 2800 | 8.63  | 970.70  | 69.95 | 1021.03 | 1.05 | Terrestrial | Dense forest  | Non-endemic |

|                             |           |      |       |         |       |         |      |             |               |             |
|-----------------------------|-----------|------|-------|---------|-------|---------|------|-------------|---------------|-------------|
| <i>Calanthe hancockii</i>   | Weixi     | 3600 | 3.83  | 970.70  | 69.95 | 1021.03 | 1.05 | Terrestrial | Grassy slope  | Non-endemic |
| <i>Calanthe herbacea</i>    | Pingbian  | 1450 | 16.12 | 1648.57 | 86.34 | 990.16  | 0.60 | Terrestrial | Dense forest  | Non-endemic |
| <i>Calanthe labrosa</i>     | Mengla    | 760  | 20.64 | 1514.70 | 84.25 | 1146.68 | 0.76 | Terrestrial | Dense forest  | Non-endemic |
| <i>Calanthe labrosa</i>     | Mengla    | 800  | 20.40 | 1514.70 | 84.25 | 1146.68 | 0.76 | Terrestrial | Dense forest  | Non-endemic |
| <i>Calanthe mannii</i>      | Luoping   | 1300 | 16.24 | 1686.24 | 82.51 | 1040.03 | 0.62 | Terrestrial | Sparse forest | Non-endemic |
| <i>Calanthe metoensis</i>   | Wenshan   | 1850 | 14.56 | 988.87  | 76.70 | 1272.98 | 1.29 | Terrestrial | Dense forest  | Non-endemic |
| <i>Calanthe odora</i>       | Pingbian  | 1300 | 17.02 | 1648.57 | 86.34 | 990.16  | 0.60 | Terrestrial | Dense forest  | Non-endemic |
| <i>Calanthe petelotiana</i> | Pingbian  | 1700 | 14.62 | 1648.57 | 86.34 | 990.16  | 0.60 | Terrestrial | Dense forest  | Non-endemic |
| <i>Calanthe plantaginea</i> | Tengchong | 2200 | 11.80 | 1501.45 | 78.06 | 857.93  | 0.57 | Terrestrial | Dense forest  | Non-endemic |
| <i>Calanthe puberula</i>    | Pingbian  | 1500 | 15.82 | 1648.57 | 86.34 | 990.16  | 0.60 | Terrestrial | Dense forest  | Non-endemic |
| <i>Calanthe puberula</i>    | Fugong    | 2000 | 12.06 | 1441.43 | 79.99 | 906.18  | 0.63 | Terrestrial | Dense forest  | Non-endemic |
| <i>Calanthe puberula</i>    | Tengchong | 2070 | 12.58 | 1501.45 | 78.06 | 857.93  | 0.57 | Terrestrial | Dense forest  | Non-endemic |
| <i>Calanthe puberula</i>    | Zhenkang  | 2450 | 10.14 | 1602.96 | 81.14 | 1089.09 | 0.68 | Terrestrial | Dense forest  | Non-endemic |
| <i>Calanthe puberula</i>    | Fugong    | 2500 | 9.06  | 1441.43 | 79.99 | 906.18  | 0.63 | Terrestrial | Dense forest  | Non-endemic |
| <i>Calanthe puberula</i>    | Lushui    | 2500 | 11.05 | 1195.57 | 70.63 | 911.65  | 0.76 | Terrestrial | Dense forest  | Non-endemic |
| <i>Calanthe puberula</i>    | Zhenkang  | 3000 | 6.84  | 1602.96 | 81.14 | 1089.09 | 0.68 | Terrestrial | Grassy slope  | Non-endemic |
| <i>Calanthe reflexa</i>     | Longling  | 1250 | 16.62 | 2098.66 | 84.65 | 973.45  | 0.46 | Terrestrial | Shrubland     | Non-endemic |
| <i>Calanthe simplex</i>     | Jingdong  | 2450 | 10.88 | 1128.40 | 76.80 | 1142.11 | 1.01 | Terrestrial | Dense forest  | Non-endemic |
| <i>Calanthe sinica</i>      | Wenshan   | 1600 | 16.06 | 988.87  | 76.70 | 1272.98 | 1.29 | Terrestrial | Dense forest  | Non-endemic |
| <i>Calanthe sylvatica</i>   | Hekou     | 1050 | 17.45 | 1768.58 | 84.25 | 1166.26 | 0.66 | Terrestrial | Dense forest  | Non-endemic |
| <i>Calanthe sylvatica</i>   | Yongde    | 1300 | 19.33 | 1266.25 | 69.00 | 1283.63 | 1.01 | Terrestrial | Dense forest  | Non-endemic |
| <i>Calanthe sylvatica</i>   | Maguan    | 1700 | 14.81 | 1330.52 | 83.25 | 1086.43 | 0.82 | Terrestrial | Dense forest  | Non-endemic |
| <i>Calanthe tricarinata</i> | Lincang   | 1700 | 16.32 | 1165.84 | 72.08 | 1167.73 | 1.00 | Terrestrial | Dense forest  | Non-endemic |
| <i>Calanthe tricarinata</i> | Kunming   | 1900 | 14.88 | 1019.14 | 72.30 | 1197.62 | 1.18 | Terrestrial | Dense forest  | Non-endemic |
| <i>Calanthe tricarinata</i> | Yiliang   | 1900 | 10.88 | 751.45  | 71.67 | 1097.64 | 1.46 | Terrestrial | Dense forest  | Non-endemic |
| <i>Calanthe tricarinata</i> | Gongshan  | 2100 | 11.48 | 1738.42 | 78.47 | 860.43  | 0.50 | Terrestrial | Dense forest  | Non-endemic |
| <i>Calanthe tricarinata</i> | Lijiang   | 2100 | 14.47 | 982.53  | 63.24 | 1077.65 | 1.10 | Terrestrial | Forest edge   | Non-endemic |
| <i>Calanthe tricarinata</i> | Weixi     | 2200 | 12.23 | 970.70  | 69.95 | 1021.03 | 1.05 | Terrestrial | Dense forest  | Non-endemic |
| <i>Calanthe tricarinata</i> | Weixi     | 2300 | 11.63 | 970.70  | 69.95 | 1021.03 | 1.05 | Terrestrial | Dense forest  | Non-endemic |
| <i>Calanthe tricarinata</i> | Gongshan  | 2300 | 10.28 | 1738.42 | 78.47 | 860.43  | 0.50 | Terrestrial | Dense forest  | Non-endemic |
| <i>Calanthe tricarinata</i> | Lushui    | 2350 | 11.95 | 1195.57 | 70.63 | 911.65  | 0.76 | Terrestrial | Dense forest  | Non-endemic |
| <i>Calanthe tricarinata</i> | Zhongdian | 2400 | 11.04 | 641.73  | 69.05 | 914.89  | 1.43 | Terrestrial | Dense forest  | Non-endemic |
| <i>Calanthe tricarinata</i> | Zhongdian | 2400 | 11.04 | 641.73  | 69.05 | 914.89  | 1.43 | Terrestrial | Dense forest  | Non-endemic |
| <i>Calanthe tricarinata</i> | Lijiang   | 2400 | 12.67 | 982.53  | 63.24 | 1077.65 | 1.10 | Terrestrial | Dense forest  | Non-endemic |
| <i>Calanthe tricarinata</i> | Weixi     | 2400 | 11.03 | 970.70  | 69.95 | 1021.03 | 1.05 | Terrestrial | Grassy slope  | Non-endemic |
| <i>Calanthe tricarinata</i> | Gongshan  | 2500 | 9.08  | 1738.42 | 78.47 | 860.43  | 0.50 | Terrestrial | Dense forest  | Non-endemic |

|                                   |           |      |       |         |       |         |      |             |              |             |
|-----------------------------------|-----------|------|-------|---------|-------|---------|------|-------------|--------------|-------------|
| <i>Calanthe tricarinata</i>       | Lijiang   | 2500 | 12.07 | 982.53  | 63.24 | 1077.65 | 1.10 | Terrestrial | Dense forest | Non-endemic |
| <i>Calanthe tricarinata</i>       | Gongshan  | 2500 | 9.08  | 1738.42 | 78.47 | 860.43  | 0.50 | Terrestrial | Dense forest | Non-endemic |
| <i>Calanthe tricarinata</i>       | Gongshan  | 2500 | 9.08  | 1738.42 | 78.47 | 860.43  | 0.50 | Terrestrial | Dense forest | Non-endemic |
| <i>Calanthe tricarinata</i>       | Qiaojia   | 2500 | 8.62  | 878.15  | 76.01 | 1034.97 | 1.18 | Terrestrial | Dense forest | Non-endemic |
| <i>Calanthe tricarinata</i>       | Lijiang   | 2600 | 11.47 | 982.53  | 63.24 | 1077.65 | 1.10 | Terrestrial | Dense forest | Non-endemic |
| <i>Calanthe tricarinata</i>       | Gongshan  | 2600 | 8.48  | 1738.42 | 78.47 | 860.43  | 0.50 | Terrestrial | Dense forest | Non-endemic |
| <i>Calanthe tricarinata</i>       | Fengqing  | 2650 | 10.30 | 1352.80 | 73.24 | 1172.52 | 0.87 | Terrestrial | Forest edge  | Non-endemic |
| <i>Calanthe tricarinata</i>       | Lijiang   | 2700 | 10.87 | 982.53  | 63.24 | 1077.65 | 1.10 | Terrestrial | Dense forest | Non-endemic |
| <i>Calanthe tricarinata</i>       | Weixi     | 2700 | 9.23  | 970.70  | 69.95 | 1021.03 | 1.05 | Terrestrial | Dense forest | Non-endemic |
| <i>Calanthe tricarinata</i>       | Weixi     | 2900 | 8.03  | 970.70  | 69.95 | 1021.03 | 1.05 | Terrestrial | Dense forest | Non-endemic |
| <i>Calanthe tricarinata</i>       | Deqin     | 3000 | 7.17  | 639.48  | 70.85 | 896.66  | 1.40 | Terrestrial | Dense forest | Non-endemic |
| <i>Calanthe tricarinata</i>       | Weixi     | 3000 | 7.43  | 970.70  | 69.95 | 1021.03 | 1.05 | Terrestrial | Dense forest | Non-endemic |
| <i>Calanthe tricarinata</i>       | Deqin     | 3000 | 7.17  | 639.48  | 70.85 | 896.66  | 1.40 | Terrestrial | Dense forest | Non-endemic |
| <i>Calanthe tricarinata</i>       | Zhongdian | 3100 | 6.84  | 641.73  | 69.05 | 914.89  | 1.43 | Terrestrial | Dense forest | Non-endemic |
| <i>Calanthe tricarinata</i>       | Zhongdian | 3150 | 6.54  | 641.73  | 69.05 | 914.89  | 1.43 | Terrestrial | Dense forest | Non-endemic |
| <i>Calanthe tricarinata</i>       | Lijiang   | 3150 | 8.17  | 982.53  | 63.24 | 1077.65 | 1.10 | Terrestrial | Forest edge  | Non-endemic |
| <i>Calanthe tricarinata</i>       | Weixi     | 3500 | 4.43  | 970.70  | 69.95 | 1021.03 | 1.05 | Terrestrial | Dense forest | Non-endemic |
| <i>Calanthe tricarinata</i>       | Weixi     | 3500 | 4.43  | 970.70  | 69.95 | 1021.03 | 1.05 | Terrestrial | Shrubland    | Non-endemic |
| <i>Calanthe trifida</i>           | Longling  | 1700 | 13.92 | 2098.66 | 84.65 | 973.45  | 0.46 | Terrestrial | Shrubland    | Non-endemic |
| <i>Calanthe triplicata</i>        | Malipo    | 550  | 20.96 | 1063.54 | 85.83 | 1053.97 | 0.99 | Terrestrial | Dense forest | Non-endemic |
| <i>Calanthe triplicata</i>        | Mengla    | 680  | 21.12 | 1514.70 | 84.25 | 1146.68 | 0.76 | Terrestrial | Dense forest | Non-endemic |
| <i>Calanthe triplicata</i>        | Pingbian  | 690  | 20.68 | 1648.57 | 86.34 | 990.16  | 0.60 | Terrestrial | Dense forest | Non-endemic |
| <i>Calanthe triplicata</i>        | Funing    | 800  | 18.82 | 1161.58 | 79.07 | 1147.17 | 0.99 | Terrestrial | Dense forest | Non-endemic |
| <i>Calanthe triplicata</i>        | Jinping   | 950  | 19.79 | 2305.17 | 83.81 | 1030.46 | 0.45 | Terrestrial | Grassy slope | Non-endemic |
| <i>Calanthe triplicata</i>        | Funing    | 1000 | 17.62 | 1161.58 | 79.07 | 1147.17 | 0.99 | Terrestrial | Dense forest | Non-endemic |
| <i>Calanthe triplicata</i>        | Malipo    | 1100 | 17.66 | 1063.54 | 85.83 | 1053.97 | 0.99 | Terrestrial | Dense forest | Non-endemic |
| <i>Calanthe triplicata</i>        | Gongshan  | 1300 | 16.28 | 1738.42 | 78.47 | 860.43  | 0.50 | Terrestrial | Dense forest | Non-endemic |
| <i>Calanthe triplicata</i>        | Maguan    | 1450 | 16.31 | 1330.52 | 83.25 | 1086.43 | 0.82 | Terrestrial | Dense forest | Non-endemic |
| <i>Calanthe triplicata</i>        | Maguan    | 1450 | 16.31 | 1330.52 | 83.25 | 1086.43 | 0.82 | Terrestrial | Dense forest | Non-endemic |
| <i>Calanthe triplicata</i>        | Xichou    | 1500 | 15.93 | 1267.54 | 82.98 | 985.97  | 0.78 | Terrestrial | Dense forest | Non-endemic |
| <i>Calanthe triplicata</i>        | Pingbian  | 1560 | 15.46 | 1648.57 | 86.34 | 990.16  | 0.60 | Terrestrial | Dense forest | Non-endemic |
| <i>Calanthe triplicata</i>        | Kunming   | 1900 | 14.88 | 1019.14 | 72.30 | 1197.62 | 1.18 | Terrestrial | Dense forest | Non-endemic |
| <i>Calanthe triplicata</i>        | Jingdong  | 2400 | 11.18 | 1128.40 | 76.80 | 1142.11 | 1.01 | Terrestrial | Dense forest | Non-endemic |
| <i>Cephalanthera alba</i>         | Luoping   | 2200 | 10.84 | 1686.24 | 82.51 | 1040.03 | 0.62 | Terrestrial | Shrubland    | Non-endemic |
| <i>Cephalanthera bijiangensis</i> | Fugong    | 2000 | 12.06 | 1441.43 | 79.99 | 906.18  | 0.63 | Terrestrial | Open site    | Endemic     |
| <i>Cephalanthera bijiangensis</i> | Gongshan  | 2260 | 10.52 | 1738.42 | 78.47 | 860.43  | 0.50 | Terrestrial | Open site    | Endemic     |

|                                       |           |      |       |         |       |         |      |             |               |             |
|---------------------------------------|-----------|------|-------|---------|-------|---------|------|-------------|---------------|-------------|
| <i>Cephalanthera calcarata</i>        | Yangbi    | 2400 | 11.59 | 1044.23 | 72.19 | 1161.15 | 1.11 | Saprophyte  | Dense forest  | Non-endemic |
| <i>Cephalanthera calcarata</i>        | Qiaojia   | 2600 | 8.02  | 878.15  | 76.01 | 1034.97 | 1.18 | Saprophyte  | Dense forest  | Non-endemic |
| <i>Cephalanthera damasonium</i>       | Lijiang   | 2100 | 14.47 | 982.53  | 63.24 | 1077.65 | 1.10 | Terrestrial | Sparse forest | Non-endemic |
| <i>Cephalanthera erecta</i>           | Lijiang   | 2400 | 12.67 | 982.53  | 63.24 | 1077.65 | 1.10 | Terrestrial | Dense forest  | Non-endemic |
| <i>Cephalanthera erecta</i>           | Fugong    | 2420 | 9.54  | 1441.43 | 79.99 | 906.18  | 0.63 | Terrestrial | Dense forest  | Non-endemic |
| <i>Cephalanthera erecta</i>           | Fugong    | 2420 | 9.54  | 1441.43 | 79.99 | 906.18  | 0.63 | Terrestrial | Dense forest  | Non-endemic |
| <i>Cephalanthera falcata</i>          | Gongshan  | 1100 | 17.48 | 1738.42 | 78.47 | 860.43  | 0.50 | Terrestrial | Dense forest  | Non-endemic |
| <i>Cephalanthera falcata</i>          | Gongshan  | 1350 | 15.98 | 1738.42 | 78.47 | 860.43  | 0.50 | Terrestrial | Dense forest  | Non-endemic |
| <i>Cephalanthera longifolia</i>       | Gongshan  | 1000 | 18.08 | 1738.42 | 78.47 | 860.43  | 0.50 | Terrestrial | Forest edge   | Non-endemic |
| <i>Cephalanthera longifolia</i>       | Weishan   | 2020 | 14.04 | 812.54  | 70.80 | 1216.02 | 1.50 | Terrestrial | Dense forest  | Non-endemic |
| <i>Cephalanthera longifolia</i>       | Kunming   | 2300 | 12.48 | 1019.14 | 72.30 | 1197.62 | 1.18 | Terrestrial | Dense forest  | Non-endemic |
| <i>Cephalanthera longifolia</i>       | Weixi     | 2550 | 10.13 | 970.70  | 69.95 | 1021.03 | 1.05 | Terrestrial | Dense forest  | Non-endemic |
| <i>Cephalanthera longifolia</i>       | Dali      | 2600 | 11.22 | 1082.70 | 68.61 | 1256.27 | 1.16 | Terrestrial | Forest edge   | Non-endemic |
| <i>Cephalanthera longifolia</i>       | Zhongdian | 2600 | 9.84  | 641.73  | 69.05 | 914.89  | 1.43 | Terrestrial | Grassy slope  | Non-endemic |
| <i>Cephalanthera longifolia</i>       | Lijiang   | 2800 | 10.27 | 982.53  | 63.24 | 1077.65 | 1.10 | Terrestrial | Dense forest  | Non-endemic |
| <i>Cephalanthera longifolia</i>       | Eryuan    | 2860 | 9.37  | 745.16  | 68.27 | 1210.94 | 1.63 | Terrestrial | Grassy slope  | Non-endemic |
| <i>Cephalanthera longifolia</i>       | Weixi     | 2900 | 8.03  | 970.70  | 69.95 | 1021.03 | 1.05 | Terrestrial | Dense forest  | Non-endemic |
| <i>Cephalanthera longifolia</i>       | Lijiang   | 2900 | 9.67  | 982.53  | 63.24 | 1077.65 | 1.10 | Terrestrial | Shrubland     | Non-endemic |
| <i>Cephalanthera longifolia</i>       | Lijiang   | 2920 | 9.55  | 982.53  | 63.24 | 1077.65 | 1.10 | Terrestrial | Dense forest  | Non-endemic |
| <i>Cephalanthera longifolia</i>       | Zhongdian | 3000 | 7.44  | 641.73  | 69.05 | 914.89  | 1.43 | Terrestrial | Dense forest  | Non-endemic |
| <i>Cephalanthera longifolia</i>       | Deqin     | 3000 | 7.17  | 639.48  | 70.85 | 896.66  | 1.40 | Terrestrial | Sparse forest | Non-endemic |
| <i>Cephalanthera longifolia</i>       | Dali      | 3050 | 8.52  | 1082.70 | 68.61 | 1256.27 | 1.16 | Terrestrial | Shrubland     | Non-endemic |
| <i>Cephalanthera longifolia</i>       | Zhongdian | 3070 | 7.02  | 641.73  | 69.05 | 914.89  | 1.43 | Terrestrial | Open site     | Non-endemic |
| <i>Cephalanthera longifolia</i>       | Zhongdian | 3100 | 6.84  | 641.73  | 69.05 | 914.89  | 1.43 | Terrestrial | Dense forest  | Non-endemic |
| <i>Cephalanthera longifolia</i>       | Yunlong   | 3300 | 6.25  | 1195.57 | 70.63 | 911.65  | 0.76 | Terrestrial | Grassy slope  | Non-endemic |
| <i>Cephalanthera longifolia</i>       | Deqin     | 3300 | 5.37  | 639.48  | 70.85 | 896.66  | 1.40 | Terrestrial | Shrubland     | Non-endemic |
| <i>Cephalanthera yunnanensis</i>      | Anning    | 1890 | 14.69 | 896.67  | 71.23 | 1167.91 | 1.30 | Terrestrial | Dense forest  | Endemic     |
| <i>Cephalanthera yunnanensis</i>      | Luquan    | 2100 | 13.12 | 965.09  | 73.60 | 1160.89 | 1.20 | Terrestrial | Sparse forest | Endemic     |
| <i>Cephalanthera yunnanensis</i>      | Luquan    | 2500 | 10.72 | 965.09  | 73.60 | 1160.89 | 1.20 | Terrestrial | Dense forest  | Endemic     |
| <i>Cephalanthera yunnanensis</i>      | Lijiang   | 2800 | 10.27 | 982.53  | 63.24 | 1077.65 | 1.10 | Terrestrial | Dense forest  | Endemic     |
| <i>Cephalantheropsis calanthoides</i> | Gongshan  | 1200 | 16.88 | 1738.42 | 78.47 | 860.43  | 0.50 | Terrestrial | Dense forest  | Non-endemic |
| <i>Cephalantheropsis gracilis</i>     | Mengla    | 800  | 20.40 | 1514.70 | 84.25 | 1146.68 | 0.76 | Terrestrial | Dense forest  | Non-endemic |
| <i>Cephalantheropsis gracilis</i>     | Pingbian  | 1280 | 17.14 | 1648.57 | 86.34 | 990.16  | 0.60 | Terrestrial | Dense forest  | Non-endemic |
| <i>Cephalantheropsis gracilis</i>     | Pingbian  | 1400 | 16.42 | 1648.57 | 86.34 | 990.16  | 0.60 | Terrestrial | Dense forest  | Non-endemic |
| <i>Ceratostylis himalaica</i>         | Zhenkang  | 1290 | 17.10 | 1602.96 | 81.14 | 1089.09 | 0.68 | Epiphyte    | Dense forest  | Non-endemic |
| <i>Ceratostylis himalaica</i>         | Pingbian  | 1300 | 17.02 | 1648.57 | 86.34 | 990.16  | 0.60 | Epiphyte    | Dense forest  | Non-endemic |

|                                      |           |      |       |         |       |         |      |             |               |             |
|--------------------------------------|-----------|------|-------|---------|-------|---------|------|-------------|---------------|-------------|
| <i>Chamaegastrodia inverta</i>       | Tengchong | 2200 | 11.80 | 1501.45 | 78.06 | 857.93  | 0.57 | Saprophyte  | Dense forest  | Non-endemic |
| <i>Chamaegastrodia inverta</i>       | Kunming   | 2600 | 10.68 | 1019.14 | 72.30 | 1197.62 | 1.18 | Saprophyte  | Dense forest  | Non-endemic |
| <i>Chamaegastrodia poilanei</i>      | Hekou     | 950  | 18.05 | 1768.58 | 84.25 | 1166.26 | 0.66 | Saprophyte  | Dense forest  | Non-endemic |
| <i>Cheirostylis chinensis</i>        | Guangnan  | 1100 | 17.65 | 1044.26 | 78.94 | 1090.35 | 1.04 | Epiphyte    | Open site     | Non-endemic |
| <i>Cheirostylis pingbianensis</i>    | Hekou     | 2000 | 11.75 | 1768.58 | 84.25 | 1166.26 | 0.66 | Terrestrial | Dense forest  | Endemic     |
| <i>Cheirostylis pingbianensis</i>    | Hekou     | 2050 | 11.45 | 1768.58 | 84.25 | 1166.26 | 0.66 | Terrestrial | Dense forest  | Endemic     |
| <i>Cheirostylis pingbianensis</i>    | Yongde    | 2360 | 12.97 | 1266.25 | 69.00 | 1283.63 | 1.01 | Terrestrial | Open site     | Endemic     |
| <i>Cheirostylis pingbianensis</i>    | Yongde    | 2400 | 12.73 | 1266.25 | 69.00 | 1283.63 | 1.01 | Terrestrial | Forest edge   | Endemic     |
| <i>Cheirostylis yunnanensis</i>      | Funing    | 600  | 20.02 | 1161.58 | 79.07 | 1147.17 | 0.99 | Epiphyte    | Open site     | Non-endemic |
| <i>Cheirostylis yunnanensis</i>      | Xichou    | 1000 | 18.93 | 1267.54 | 82.98 | 985.97  | 0.78 | Epiphyte    | Dense forest  | Non-endemic |
| <i>Cheirostylis yunnanensis</i>      | Xichou    | 1300 | 17.13 | 1267.54 | 82.98 | 985.97  | 0.78 | Epiphyte    | Forest edge   | Non-endemic |
| <i>Cheirostylis yunnanensis</i>      | Wenshan   | 1442 | 17.01 | 988.87  | 76.70 | 1272.98 | 1.29 | Epiphyte    | Open site     | Non-endemic |
| <i>Cheirostylis yunnanensis</i>      | Zhenkang  | 1640 | 15.00 | 1602.96 | 81.14 | 1089.09 | 0.68 | Epiphyte    | Dense forest  | Non-endemic |
| <i>Cheirostylis yunnanensis</i>      | Jingdong  | 1700 | 15.38 | 1128.40 | 76.80 | 1142.11 | 1.01 | Epiphyte    | Open site     | Non-endemic |
| <i>Cheirostylis yunnanensis</i>      | Wenshan   | 1800 | 14.86 | 988.87  | 76.70 | 1272.98 | 1.29 | Epiphyte    | Forest edge   | Non-endemic |
| <i>Chiloschista griffithii</i>       | Wuding    | 2260 | 11.83 | 988.68  | 74.74 | 1188.19 | 1.20 | Epiphyte    | Dense forest  | Non-endemic |
| <i>Chiloschista yunnanensis</i>      | Menghai   | 1300 | 17.76 | 1314.38 | 80.83 | 1150.91 | 0.88 | Epiphyte    | Sparse forest | Non-endemic |
| <i>Chiloschista yunnanensis</i>      | Menghai   | 1350 | 17.46 | 1314.38 | 80.83 | 1150.91 | 0.88 | Epiphyte    | Dense forest  | Non-endemic |
| <i>Chiloschista yunnanensis</i>      | Lancang   | 1500 | 16.70 | 1596.50 | 77.88 | 1183.80 | 0.74 | Epiphyte    | Sparse forest | Non-endemic |
| <i>Chiloschista yunnanensis</i>      | Menghai   | 2000 | 13.56 | 1314.38 | 80.83 | 1150.91 | 0.88 | Epiphyte    | Dense forest  | Non-endemic |
| <i>Chrysoglossum ornatum</i>         | Lincang   | 1500 | 17.52 | 1165.84 | 72.08 | 1167.73 | 1.00 | Terrestrial | Dense forest  | Non-endemic |
| <i>Chusua pauciflora</i>             | Zhongdian | 3190 | 6.30  | 641.73  | 69.05 | 914.89  | 1.43 | Terrestrial | Dense forest  | Non-endemic |
| <i>Chusua pauciflora</i>             | Zhongdian | 3930 | 1.86  | 641.73  | 69.05 | 914.89  | 1.43 | Terrestrial | Dense forest  | Non-endemic |
| <i>Cleisostoma filiforme</i>         | Mengla    | 620  | 21.48 | 1514.70 | 84.25 | 1146.68 | 0.76 | Epiphyte    | Forest edge   | Non-endemic |
| <i>Cleisostoma fuerstenbergianum</i> | Jinping   | 700  | 21.29 | 2305.17 | 83.81 | 1030.46 | 0.45 | Epiphyte    | Dense forest  | Non-endemic |
| <i>Cleisostoma fuerstenbergianum</i> | Menghai   | 1030 | 19.38 | 1314.38 | 80.83 | 1150.91 | 0.88 | Epiphyte    | Dense forest  | Non-endemic |
| <i>Cleisostoma fuerstenbergianum</i> | Menghai   | 1300 | 17.76 | 1314.38 | 80.83 | 1150.91 | 0.88 | Epiphyte    | Dense forest  | Non-endemic |
| <i>Cleisostoma fuerstenbergianum</i> | Zhenkang  | 1500 | 15.84 | 1602.96 | 81.14 | 1089.09 | 0.68 | Epiphyte    | Dense forest  | Non-endemic |
| <i>Cleisostoma fuerstenbergianum</i> | Menghai   | 1500 | 16.56 | 1314.38 | 80.83 | 1150.91 | 0.88 | Epiphyte    | Dense forest  | Non-endemic |
| <i>Cleisostoma fuerstenbergianum</i> | Fengqing  | 1700 | 16.00 | 1352.80 | 73.24 | 1172.52 | 0.87 | Epiphyte    | Dense forest  | Non-endemic |
| <i>Cleisostoma fuerstenbergianum</i> | Lancang   | 1800 | 14.90 | 1596.50 | 77.88 | 1183.80 | 0.74 | Epiphyte    | Dense forest  | Non-endemic |
| <i>Cleisostoma fuerstenbergianum</i> | Fengqing  | 1900 | 14.80 | 1352.80 | 73.24 | 1172.52 | 0.87 | Epiphyte    | Dense forest  | Non-endemic |
| <i>Cleisostoma fuerstenbergianum</i> | Fengqing  | 2000 | 14.20 | 1352.80 | 73.24 | 1172.52 | 0.87 | Epiphyte    | Dense forest  | Non-endemic |
| <i>Cleisostoma menghaiense</i>       | Jinghong  | 900  | 20.32 | 1161.08 | 80.46 | 1256.19 | 1.08 | Epiphyte    | Shrubland     | Endemic     |
| <i>Cleisostoma menghaiense</i>       | Menghai   | 2000 | 13.56 | 1314.38 | 80.83 | 1150.91 | 0.88 | Epiphyte    | Dense forest  | Endemic     |
| <i>Cleisostoma menghaiense</i>       | Yongde    | 2700 | 10.93 | 1266.25 | 69.00 | 1283.63 | 1.01 | Epiphyte    | Dense forest  | Endemic     |



|                                 |           |      |       |         |       |         |      |             |               |             |
|---------------------------------|-----------|------|-------|---------|-------|---------|------|-------------|---------------|-------------|
| <i>Cleisostoma paniculatum</i>  | Maguan    | 1200 | 17.81 | 1330.52 | 83.25 | 1086.43 | 0.82 | Epiphyte    | Dense forest  | Non-endemic |
| <i>Cleisostoma paniculatum</i>  | Pingbian  | 1240 | 17.38 | 1648.57 | 86.34 | 990.16  | 0.60 | Epiphyte    | Dense forest  | Non-endemic |
| <i>Cleisostoma paniculatum</i>  | Luoping   | 1300 | 16.24 | 1686.24 | 82.51 | 1040.03 | 0.62 | Epiphyte    | Dense forest  | Non-endemic |
| <i>Cleisostoma paniculatum</i>  | Guangnan  | 1300 | 16.45 | 1044.26 | 78.94 | 1090.35 | 1.04 | Epiphyte    | Shrubland     | Non-endemic |
| <i>Cleisostoma racemiferum</i>  | Xinping   | 600  | 22.80 | 957.31  | 74.08 | 1291.86 | 1.35 | Epiphyte    | Dense forest  | Non-endemic |
| <i>Cleisostoma racemiferum</i>  | Menghai   | 1770 | 14.94 | 1314.38 | 80.83 | 1150.91 | 0.88 | Epiphyte    | Dense forest  | Non-endemic |
| <i>Cleisostoma rostratum</i>    | Lancang   | 1500 | 16.70 | 1596.50 | 77.88 | 1183.80 | 0.74 | Epiphyte    | Dense forest  | Non-endemic |
| <i>Cleisostoma sagittiforme</i> | Jinghong  | 540  | 22.48 | 1161.08 | 80.46 | 1256.19 | 1.08 | Epiphyte    | Dense forest  | Non-endemic |
| <i>Cleisostoma sagittiforme</i> | Jinghong  | 650  | 21.82 | 1161.08 | 80.46 | 1256.19 | 1.08 | Epiphyte    | Sparse forest | Non-endemic |
| <i>Cleisostoma sagittiforme</i> | Jinghong  | 850  | 20.62 | 1161.08 | 80.46 | 1256.19 | 1.08 | Epiphyte    | Shrubland     | Non-endemic |
| <i>Cleisostoma sagittiforme</i> | Menghai   | 1500 | 16.56 | 1314.38 | 80.83 | 1150.91 | 0.88 | Epiphyte    | Dense forest  | Non-endemic |
| <i>Cleisostoma sagittiforme</i> | Menghai   | 1530 | 16.38 | 1314.38 | 80.83 | 1150.91 | 0.88 | Epiphyte    | Dense forest  | Non-endemic |
| <i>Cleisostoma sagittiforme</i> | Menghai   | 1530 | 16.38 | 1314.38 | 80.83 | 1150.91 | 0.88 | Epiphyte    | Shrubland     | Non-endemic |
| <i>Cleisostoma simondii</i>     | Jinghong  | 1100 | 19.12 | 1161.08 | 80.46 | 1256.19 | 1.08 | Epiphyte    | Shrubland     | Non-endemic |
| <i>Cleisostoma simondii</i>     | Yongde    | 2000 | 15.13 | 1266.25 | 69.00 | 1283.63 | 1.01 | Epiphyte    | Dense forest  | Non-endemic |
| <i>Cleisostoma striatum</i>     | Xichou    | 1300 | 17.13 | 1267.54 | 82.98 | 985.97  | 0.78 | Epiphyte    | Dense forest  | Non-endemic |
| <i>Cleisostoma striatum</i>     | Malipo    | 1400 | 15.86 | 1063.54 | 85.83 | 1053.97 | 0.99 | Epiphyte    | Dense forest  | Non-endemic |
| <i>Cleisostoma striatum</i>     | Zhenkang  | 1600 | 15.24 | 1602.96 | 81.14 | 1089.09 | 0.68 | Epiphyte    | Dense forest  | Non-endemic |
| <i>Cleisostoma williamsonii</i> | Funing    | 700  | 19.42 | 1161.58 | 79.07 | 1147.17 | 0.99 | Epiphyte    | Dense forest  | Non-endemic |
| <i>Cleisostoma williamsonii</i> | Funing    | 700  | 19.42 | 1161.58 | 79.07 | 1147.17 | 0.99 | Epiphyte    | Forest edge   | Non-endemic |
| <i>Cleisostoma williamsonii</i> | Jinping   | 1260 | 17.93 | 2305.17 | 83.81 | 1030.46 | 0.45 | Epiphyte    | Sparse forest | Non-endemic |
| <i>Cleisostoma williamsonii</i> | Pingbian  | 1400 | 16.42 | 1648.57 | 86.34 | 990.16  | 0.60 | Epiphyte    | Dense forest  | Non-endemic |
| <i>Cleisostoma williamsonii</i> | Wenshan   | 1500 | 16.66 | 988.87  | 76.70 | 1272.98 | 1.29 | Epiphyte    | Dense forest  | Non-endemic |
| <i>Cleisostoma williamsonii</i> | Yuxi      | 1600 | 16.17 | 928.04  | 74.41 | 1159.15 | 1.25 | Epiphyte    | Dense forest  | Non-endemic |
| <i>Cleisostoma williamsonii</i> | Jinping   | 1700 | 15.29 | 2305.17 | 83.81 | 1030.46 | 0.45 | Epiphyte    | Dense forest  | Non-endemic |
| <i>Cleisostoma williamsonii</i> | Fengqing  | 2200 | 13.00 | 1352.80 | 73.24 | 1172.52 | 0.87 | Epiphyte    | Dense forest  | Non-endemic |
| <i>Coeloglossum viride</i>      | Zhongdian | 3100 | 6.84  | 641.73  | 69.05 | 914.89  | 1.43 | Terrestrial | Dense forest  | Non-endemic |
| <i>Coeloglossum viride</i>      | Weixi     | 3100 | 6.83  | 970.70  | 69.95 | 1021.03 | 1.05 | Terrestrial | Meadow        | Non-endemic |
| <i>Coeloglossum viride</i>      | Weixi     | 3500 | 4.43  | 970.70  | 69.95 | 1021.03 | 1.05 | Terrestrial | Dense forest  | Non-endemic |
| <i>Coeloglossum viride</i>      | Zhongdian | 3700 | 3.24  | 641.73  | 69.05 | 914.89  | 1.43 | Terrestrial | Meadow        | Non-endemic |
| <i>Coeloglossum viride</i>      | Zhongdian | 3800 | 2.64  | 641.73  | 69.05 | 914.89  | 1.43 | Terrestrial | Dense forest  | Non-endemic |
| <i>Coelogyne barbata</i>        | Menghai   | 1080 | 19.08 | 1314.38 | 80.83 | 1150.91 | 0.88 | Epiphyte    | Shrubland     | Non-endemic |
| <i>Coelogyne barbata</i>        | Menghai   | 1080 | 19.08 | 1314.38 | 80.83 | 1150.91 | 0.88 | Epiphyte    | Shrubland     | Non-endemic |
| <i>Coelogyne barbata</i>        | Gongshan  | 1200 | 16.88 | 1738.42 | 78.47 | 860.43  | 0.50 | Epiphyte    | Dense forest  | Non-endemic |
| <i>Coelogyne barbata</i>        | Pingbian  | 1240 | 17.38 | 1648.57 | 86.34 | 990.16  | 0.60 | Epiphyte    | Dense forest  | Non-endemic |
| <i>Coelogyne barbata</i>        | Zhenkang  | 1640 | 15.00 | 1602.96 | 81.14 | 1089.09 | 0.68 | epiphyte    | Shrubland     | Non-endemic |

|                                |          |      |       |         |       |         |      |          |              |             |
|--------------------------------|----------|------|-------|---------|-------|---------|------|----------|--------------|-------------|
| <i>Coelogyne barbata</i>       | Gengma   | 1670 | 10.67 | 1327.70 | 77.28 | 1181.78 | 0.89 | Epiphyte | Dense forest | Non-endemic |
| <i>Coelogyne barbata</i>       | Eryuan   | 2460 | 11.77 | 745.16  | 68.27 | 1210.94 | 1.63 | Epiphyte | Forest edge  | Non-endemic |
| <i>Coelogyne barbata</i>       | Fugong   | 2800 | 7.26  | 1441.43 | 79.99 | 906.18  | 0.63 | Epiphyte | Dense forest | Non-endemic |
| <i>Coelogyne calcicola</i>     | Zhenkang | 1465 | 16.05 | 1602.96 | 81.14 | 1089.09 | 0.68 | Epiphyte | Dense forest | Non-endemic |
| <i>Coelogyne corymbosa</i>     | Yongde   | 2240 | 13.69 | 1266.25 | 69.00 | 1283.63 | 1.01 | epiphyte | Forest edge  | Non-endemic |
| <i>Coelogyne corymbosa</i>     | Yongde   | 2460 | 12.37 | 1266.25 | 69.00 | 1283.63 | 1.01 | Epiphyte | Dense forest | Non-endemic |
| <i>Coelogyne corymbosa</i>     | Yongde   | 2480 | 12.25 | 1266.25 | 69.00 | 1283.63 | 1.01 | Epiphyte | Forest edge  | Non-endemic |
| <i>Coelogyne corymbosa</i>     | Yongde   | 2520 | 12.01 | 1266.25 | 69.00 | 1283.63 | 1.01 | Epiphyte | Forest edge  | Non-endemic |
| <i>Coelogyne corymbosa</i>     | Yongde   | 2700 | 10.93 | 1266.25 | 69.00 | 1283.63 | 1.01 | Epiphyte | Dense forest | Non-endemic |
| <i>Coelogyne corymbosa</i>     | Yongde   | 2900 | 9.73  | 1266.25 | 69.00 | 1283.63 | 1.01 | Epiphyte | Shrubland    | Non-endemic |
| <i>Coelogyne fimbriata</i>     | Yanshan  | 1200 | 18.26 | 1003.57 | 79.42 | 1172.21 | 1.17 | Epiphyte | Dense forest | Non-endemic |
| <i>Coelogyne fimbriata</i>     | Gongshan | 1380 | 15.80 | 1738.42 | 78.47 | 860.43  | 0.50 | Epiphyte | Forest edge  | Non-endemic |
| <i>Coelogyne fimbriata</i>     | Weixi    | 1900 | 14.03 | 970.70  | 69.95 | 1021.03 | 1.05 | Epiphyte | Forest edge  | Non-endemic |
| <i>Coelogyne fimbriata</i>     | Gongshan | 2300 | 10.28 | 1738.42 | 78.47 | 860.43  | 0.50 | Epiphyte | Dense forest | Non-endemic |
| <i>Coelogyne flaccida</i>      | Zhenkang | 1600 | 15.24 | 1602.96 | 81.14 | 1089.09 | 0.68 | Epiphyte | Dense forest | Non-endemic |
| <i>Coelogyne flaccida</i>      | Xichou   | 1700 | 14.73 | 1267.54 | 82.98 | 985.97  | 0.78 | Epiphyte | Dense forest | Non-endemic |
| <i>Coelogyne flaccida</i>      | Jingdong | 1700 | 15.38 | 1128.40 | 76.80 | 1142.11 | 1.01 | Epiphyte | Forest edge  | Non-endemic |
| <i>Coelogyne gongshanensis</i> | Gongshan | 2800 | 7.28  | 1738.42 | 78.47 | 860.43  | 0.50 | Epiphyte | Dense forest | Endemic     |
| <i>Coelogyne gongshanensis</i> | Gongshan | 3000 | 6.08  | 1738.42 | 78.47 | 860.43  | 0.50 | Epiphyte | Dense forest | Endemic     |
| <i>Coelogyne gongshanensis</i> | Gongshan | 3200 | 4.88  | 1738.42 | 78.47 | 860.43  | 0.50 | Epiphyte | Shrubland    | Endemic     |
| <i>Coelogyne leucantha</i>     | Xichou   | 1400 | 16.53 | 1267.54 | 82.98 | 985.97  | 0.78 | Epiphyte | Dense forest | Non-endemic |
| <i>Coelogyne leucantha</i>     | Jingdong | 2070 | 13.16 | 1128.40 | 76.80 | 1142.11 | 1.01 | Epiphyte | Dense forest | Non-endemic |
| <i>Coelogyne leucantha</i>     | Nanjian  | 2560 | 12.21 | 735.93  | 63.17 | 1535.84 | 2.09 | Epiphyte | Dense forest | Non-endemic |
| <i>Coelogyne longipes</i>      | Xichou   | 850  | 19.83 | 1267.54 | 82.98 | 985.97  | 0.78 | Epiphyte | Dense forest | Non-endemic |
| <i>Coelogyne longipes</i>      | Xichou   | 900  | 19.53 | 1267.54 | 82.98 | 985.97  | 0.78 | Epiphyte | Dense forest | Non-endemic |
| <i>Coelogyne longipes</i>      | Xichou   | 1000 | 18.93 | 1267.54 | 82.98 | 985.97  | 0.78 | Epiphyte | Dense forest | Non-endemic |
| <i>Coelogyne longipes</i>      | Xichou   | 1100 | 18.33 | 1267.54 | 82.98 | 985.97  | 0.78 | Epiphyte | Dense forest | Non-endemic |
| <i>Coelogyne longipes</i>      | Gongshan | 1380 | 15.80 | 1738.42 | 78.47 | 860.43  | 0.50 | Epiphyte | Dense forest | Non-endemic |
| <i>Coelogyne longipes</i>      | Gongshan | 1400 | 15.68 | 1738.42 | 78.47 | 860.43  | 0.50 | Epiphyte | Dense forest | Non-endemic |
| <i>Coelogyne longipes</i>      | Gongshan | 1400 | 15.68 | 1738.42 | 78.47 | 860.43  | 0.50 | Epiphyte | Dense forest | Non-endemic |
| <i>Coelogyne longipes</i>      | Gongshan | 1400 | 15.68 | 1738.42 | 78.47 | 860.43  | 0.50 | Epiphyte | Dense forest | Non-endemic |
| <i>Coelogyne longipes</i>      | Xichou   | 1550 | 15.63 | 1267.54 | 82.98 | 985.97  | 0.78 | Epiphyte | Dense forest | Non-endemic |
| <i>Coelogyne longipes</i>      | Pingbian | 1600 | 15.22 | 1648.57 | 86.34 | 990.16  | 0.60 | Epiphyte | Dense forest | Non-endemic |
| <i>Coelogyne longipes</i>      | Xichou   | 1600 | 15.33 | 1267.54 | 82.98 | 985.97  | 0.78 | Epiphyte | Dense forest | Non-endemic |
| <i>Coelogyne longipes</i>      | Pingbian | 1600 | 15.22 | 1648.57 | 86.34 | 990.16  | 0.60 | Epiphyte | Dense forest | Non-endemic |
| <i>Coelogyne longipes</i>      | Gongshan | 1700 | 13.88 | 1738.42 | 78.47 | 860.43  | 0.50 | Epiphyte | Dense forest | Non-endemic |

|                            |          |      |       |         |       |         |      |          |               |             |
|----------------------------|----------|------|-------|---------|-------|---------|------|----------|---------------|-------------|
| <i>Coelogyne longipes</i>  | Xichou   | 1700 | 14.73 | 1267.54 | 82.98 | 985.97  | 0.78 | Epiphyte | Dense forest  | Non-endemic |
| <i>Coelogyne longipes</i>  | Jinping  | 1750 | 14.99 | 2305.17 | 83.81 | 1030.46 | 0.45 | Epiphyte | Dense forest  | Non-endemic |
| <i>Coelogyne longipes</i>  | Jinping  | 1800 | 14.69 | 2305.17 | 83.81 | 1030.46 | 0.45 | Epiphyte | Dense forest  | Non-endemic |
| <i>Coelogyne longipes</i>  | Pingbian | 1900 | 13.42 | 1648.57 | 86.34 | 990.16  | 0.60 | Epiphyte | Dense forest  | Non-endemic |
| <i>Coelogyne longipes</i>  | Pingbian | 1900 | 13.42 | 1648.57 | 86.34 | 990.16  | 0.60 | Epiphyte | Dense forest  | Non-endemic |
| <i>Coelogyne longipes</i>  | Pingbian | 1900 | 13.42 | 1648.57 | 86.34 | 990.16  | 0.60 | Epiphyte | Dense forest  | Non-endemic |
| <i>Coelogyne longipes</i>  | Gongshan | 2000 | 12.08 | 1738.42 | 78.47 | 860.43  | 0.50 | Epiphyte | Dense forest  | Non-endemic |
| <i>Coelogyne longipes</i>  | Jingdong | 2100 | 12.98 | 1128.40 | 76.80 | 1142.11 | 1.01 | Epiphyte | Forest edge   | Non-endemic |
| <i>Coelogyne longipes</i>  | Jinping  | 2200 | 12.29 | 2305.17 | 83.81 | 1030.46 | 0.45 | Epiphyte | Dense forest  | Non-endemic |
| <i>Coelogyne longipes</i>  | Fuming   | 2200 | 12.77 | 871.62  | 71.93 | 1209.56 | 1.39 | Epiphyte | Forest edge   | Non-endemic |
| <i>Coelogyne longipes</i>  | Jingdong | 2400 | 11.18 | 1128.40 | 76.80 | 1142.11 | 1.01 | Epiphyte | Dense forest  | Non-endemic |
| <i>Coelogyne longipes</i>  | Lincang  | 2500 | 11.52 | 1165.84 | 72.08 | 1167.73 | 1.00 | Epiphyte | Dense forest  | Non-endemic |
| <i>Coelogyne longipes</i>  | Jingdong | 2600 | 9.98  | 1128.40 | 76.80 | 1142.11 | 1.01 | Epiphyte | Dense forest  | Non-endemic |
| <i>Coelogyne nitida</i>    | Yangbi   | 2800 | 9.19  | 1044.23 | 72.19 | 1161.15 | 1.11 | Epiphyte | Dense forest  | Non-endemic |
| <i>Coelogyne nitida</i>    | Dali     | 3100 | 8.22  | 1082.70 | 68.61 | 1256.27 | 1.16 | epiphyte | Shrubland     | Non-endemic |
| <i>Coelogyne occultata</i> | Gongshan | 1300 | 16.28 | 1738.42 | 78.47 | 860.43  | 0.50 | Epiphyte | Dense forest  | Non-endemic |
| <i>Coelogyne occultata</i> | Gongshan | 2100 | 11.48 | 1738.42 | 78.47 | 860.43  | 0.50 | Epiphyte | Dense forest  | Non-endemic |
| <i>Coelogyne occultata</i> | Lushui   | 2100 | 13.45 | 1195.57 | 70.63 | 911.65  | 0.76 | Epiphyte | Dense forest  | Non-endemic |
| <i>Coelogyne occultata</i> | Lushui   | 2300 | 12.25 | 1195.57 | 70.63 | 911.65  | 0.76 | Epiphyte | Dense forest  | Non-endemic |
| <i>Coelogyne occultata</i> | Gongshan | 2300 | 10.28 | 1738.42 | 78.47 | 860.43  | 0.50 | Epiphyte | Dense forest  | Non-endemic |
| <i>Coelogyne occultata</i> | Lushui   | 2400 | 11.65 | 1195.57 | 70.63 | 911.65  | 0.76 | Epiphyte | Dense forest  | Non-endemic |
| <i>Coelogyne occultata</i> | Yongde   | 2400 | 12.73 | 1266.25 | 69.00 | 1283.63 | 1.01 | Epiphyte | Shrubland     | Non-endemic |
| <i>Coelogyne occultata</i> | Longling | 2500 | 9.12  | 2098.66 | 84.65 | 973.45  | 0.46 | Epiphyte | Dense forest  | Non-endemic |
| <i>Coelogyne occultata</i> | Gongshan | 2500 | 9.08  | 1738.42 | 78.47 | 860.43  | 0.50 | Epiphyte | Dense forest  | Non-endemic |
| <i>Coelogyne occultata</i> | Fugong   | 2700 | 7.86  | 1441.43 | 79.99 | 906.18  | 0.63 | Epiphyte | Dense forest  | Non-endemic |
| <i>Coelogyne occultata</i> | Yongde   | 2800 | 10.33 | 1266.25 | 69.00 | 1283.63 | 1.01 | Epiphyte | Dense forest  | Non-endemic |
| <i>Coelogyne occultata</i> | Jingdong | 2800 | 8.78  | 1128.40 | 76.80 | 1142.11 | 1.01 | Epiphyte | Sparse forest | Non-endemic |
| <i>Coelogyne occultata</i> | Fugong   | 3000 | 6.06  | 1441.43 | 79.99 | 906.18  | 0.63 | Epiphyte | Dense forest  | Non-endemic |
| <i>Coelogyne ovalis</i>    | Malipo   | 1080 | 17.78 | 1063.54 | 85.83 | 1053.97 | 0.99 | Epiphyte | Dense forest  | Non-endemic |
| <i>Coelogyne ovalis</i>    | Gongshan | 1200 | 16.88 | 1738.42 | 78.47 | 860.43  | 0.50 | Epiphyte | Dense forest  | Non-endemic |
| <i>Coelogyne ovalis</i>    | Malipo   | 1300 | 16.46 | 1063.54 | 85.83 | 1053.97 | 0.99 | Epiphyte | Dense forest  | Non-endemic |
| <i>Coelogyne ovalis</i>    | Mengla   | 1300 | 17.40 | 1514.70 | 84.25 | 1146.68 | 0.76 | Epiphyte | Dense forest  | Non-endemic |
| <i>Coelogyne ovalis</i>    | Jinghong | 1300 | 17.92 | 1161.08 | 80.46 | 1256.19 | 1.08 | Epiphyte | Dense forest  | Non-endemic |
| <i>Coelogyne ovalis</i>    | Gongshan | 1350 | 15.98 | 1738.42 | 78.47 | 860.43  | 0.50 | Epiphyte | Shrubland     | Non-endemic |
| <i>Coelogyne ovalis</i>    | Gongshan | 1400 | 15.68 | 1738.42 | 78.47 | 860.43  | 0.50 | Epiphyte | Dense forest  | Non-endemic |
| <i>Coelogyne ovalis</i>    | Jinghong | 1415 | 17.23 | 1161.08 | 80.46 | 1256.19 | 1.08 | Epiphyte | Shrubland     | Non-endemic |

|                             |          |      |       |         |       |         |      |          |               |             |
|-----------------------------|----------|------|-------|---------|-------|---------|------|----------|---------------|-------------|
| <i>Coelogyne ovalis</i>     | Xichou   | 1500 | 15.93 | 1267.54 | 82.98 | 985.97  | 0.78 | Epiphyte | Dense forest  | Non-endemic |
| <i>Coelogyne ovalis</i>     | Gongshan | 1600 | 14.48 | 1738.42 | 78.47 | 860.43  | 0.50 | Epiphyte | Dense forest  | Non-endemic |
| <i>Coelogyne ovalis</i>     | Lushui   | 1600 | 16.45 | 1195.57 | 70.63 | 911.65  | 0.76 | Epiphyte | Dense forest  | Non-endemic |
| <i>Coelogyne ovalis</i>     | Gongshan | 1600 | 14.48 | 1738.42 | 78.47 | 860.43  | 0.50 | Epiphyte | Dense forest  | Non-endemic |
| <i>Coelogyne ovalis</i>     | Gongshan | 1800 | 13.28 | 1738.42 | 78.47 | 860.43  | 0.50 | Epiphyte | Dense forest  | Non-endemic |
| <i>Coelogyne ovalis</i>     | Fugong   | 2500 | 9.06  | 1441.43 | 79.99 | 906.18  | 0.63 | Epiphyte | Dense forest  | Non-endemic |
| <i>Coelogyne ovalis</i>     | Fugong   | 2700 | 7.86  | 1441.43 | 79.99 | 906.18  | 0.63 | Epiphyte | Dense forest  | Non-endemic |
| <i>Coelogyne ovalis</i>     | Fugong   | 2800 | 7.26  | 1441.43 | 79.99 | 906.18  | 0.63 | Epiphyte | Dense forest  | Non-endemic |
| <i>Coelogyne ovalis</i>     | Fugong   | 2800 | 7.26  | 1441.43 | 79.99 | 906.18  | 0.63 | Epiphyte | Dense forest  | Non-endemic |
| <i>Coelogyne ovalis</i>     | Gongshan | 3000 | 6.08  | 1738.42 | 78.47 | 860.43  | 0.50 | Epiphyte | Dense forest  | Non-endemic |
| <i>Coelogyne ovalis</i>     | Fugong   | 3200 | 4.86  | 1441.43 | 79.99 | 906.18  | 0.63 | Epiphyte | Meadow        | Non-endemic |
| <i>Coelogyne prolifera</i>  | Xichou   | 870  | 19.71 | 1267.54 | 82.98 | 985.97  | 0.78 | Epiphyte | Dense forest  | Non-endemic |
| <i>Coelogyne prolifera</i>  | Xichou   | 1100 | 18.33 | 1267.54 | 82.98 | 985.97  | 0.78 | Epiphyte | Dense forest  | Non-endemic |
| <i>Coelogyne prolifera</i>  | Gongshan | 1400 | 15.68 | 1738.42 | 78.47 | 860.43  | 0.50 | Epiphyte | Dense forest  | Non-endemic |
| <i>Coelogyne prolifera</i>  | Gongshan | 1500 | 15.08 | 1738.42 | 78.47 | 860.43  | 0.50 | Epiphyte | Dense forest  | Non-endemic |
| <i>Coelogyne prolifera</i>  | Gongshan | 1540 | 14.84 | 1738.42 | 78.47 | 860.43  | 0.50 | Epiphyte | Dense forest  | Non-endemic |
| <i>Coelogyne prolifera</i>  | Xichou   | 1550 | 15.63 | 1267.54 | 82.98 | 985.97  | 0.78 | Epiphyte | Dense forest  | Non-endemic |
| <i>Coelogyne prolifera</i>  | Xichou   | 1600 | 15.33 | 1267.54 | 82.98 | 985.97  | 0.78 | Epiphyte | Dense forest  | Non-endemic |
| <i>Coelogyne prolifera</i>  | Menghai  | 1600 | 15.96 | 1314.38 | 80.83 | 1150.91 | 0.88 | Epiphyte | Shrubland     | Non-endemic |
| <i>Coelogyne prolifera</i>  | Gongshan | 1700 | 13.88 | 1738.42 | 78.47 | 860.43  | 0.50 | Epiphyte | Dense forest  | Non-endemic |
| <i>Coelogyne prolifera</i>  | Menghai  | 1760 | 15.00 | 1314.38 | 80.83 | 1150.91 | 0.88 | Epiphyte | Dense forest  | Non-endemic |
| <i>Coelogyne prolifera</i>  | Menghai  | 2000 | 13.56 | 1314.38 | 80.83 | 1150.91 | 0.88 | Epiphyte | Dense forest  | Non-endemic |
| <i>Coelogyne prolifera</i>  | Fugong   | 2000 | 12.06 | 1441.43 | 79.99 | 906.18  | 0.63 | Epiphyte | Dense forest  | Non-endemic |
| <i>Coelogyne prolifera</i>  | Lijiang  | 2100 | 14.47 | 982.53  | 63.24 | 1077.65 | 1.10 | Epiphyte | Sparse forest | Non-endemic |
| <i>Coelogyne prolifera</i>  | Lijiang  | 2300 | 13.27 | 982.53  | 63.24 | 1077.65 | 1.10 | Epiphyte | Dense forest  | Non-endemic |
| <i>Coelogyne prolifera</i>  | Lijiang  | 2500 | 12.07 | 982.53  | 63.24 | 1077.65 | 1.10 | Epiphyte | Sparse forest | Non-endemic |
| <i>Coelogyne punctulata</i> | Dali     | 1300 | 19.02 | 1082.70 | 68.61 | 1256.27 | 1.16 | Epiphyte | Dense forest  | Non-endemic |
| <i>Coelogyne punctulata</i> | Gongshan | 1300 | 16.28 | 1738.42 | 78.47 | 860.43  | 0.50 | Epiphyte | Dense forest  | Non-endemic |
| <i>Coelogyne punctulata</i> | Gongshan | 1300 | 16.28 | 1738.42 | 78.47 | 860.43  | 0.50 | Epiphyte | Dense forest  | Non-endemic |
| <i>Coelogyne punctulata</i> | Hekou    | 1300 | 15.95 | 1768.58 | 84.25 | 1166.26 | 0.66 | Epiphyte | Dense forest  | Non-endemic |
| <i>Coelogyne punctulata</i> | Gongshan | 1310 | 16.22 | 1738.42 | 78.47 | 860.43  | 0.50 | Epiphyte | Dense forest  | Non-endemic |
| <i>Coelogyne punctulata</i> | Gongshan | 1320 | 16.16 | 1738.42 | 78.47 | 860.43  | 0.50 | Epiphyte | Dense forest  | Non-endemic |
| <i>Coelogyne punctulata</i> | Gongshan | 1350 | 15.98 | 1738.42 | 78.47 | 860.43  | 0.50 | Epiphyte | Dense forest  | Non-endemic |
| <i>Coelogyne punctulata</i> | Gongshan | 1350 | 15.98 | 1738.42 | 78.47 | 860.43  | 0.50 | Epiphyte | Dense forest  | Non-endemic |
| <i>Coelogyne punctulata</i> | Gongshan | 1380 | 15.80 | 1738.42 | 78.47 | 860.43  | 0.50 | Epiphyte | Dense forest  | Non-endemic |
| <i>Coelogyne punctulata</i> | Gongshan | 1400 | 15.68 | 1738.42 | 78.47 | 860.43  | 0.50 | Epiphyte | Dense forest  | Non-endemic |

|                             |          |      |       |         |       |         |      |          |              |             |
|-----------------------------|----------|------|-------|---------|-------|---------|------|----------|--------------|-------------|
| <i>Coelogyne punctulata</i> | Gongshan | 1400 | 15.68 | 1738.42 | 78.47 | 860.43  | 0.50 | Epiphyte | Dense forest | Non-endemic |
| <i>Coelogyne punctulata</i> | Xichou   | 1550 | 15.63 | 1267.54 | 82.98 | 985.97  | 0.78 | Epiphyte | Dense forest | Non-endemic |
| <i>Coelogyne punctulata</i> | Gongshan | 1600 | 14.48 | 1738.42 | 78.47 | 860.43  | 0.50 | Epiphyte | Dense forest | Non-endemic |
| <i>Coelogyne punctulata</i> | Gengma   | 1700 | 15.65 | 1327.70 | 77.28 | 1181.78 | 0.89 | Epiphyte | Dense forest | Non-endemic |
| <i>Coelogyne punctulata</i> | Gongshan | 1950 | 12.38 | 1738.42 | 78.47 | 860.43  | 0.50 | Epiphyte | Dense forest | Non-endemic |
| <i>Coelogyne punctulata</i> | Lancang  | 2000 | 13.70 | 1596.50 | 77.88 | 1183.80 | 0.74 | Epiphyte | Dense forest | Non-endemic |
| <i>Coelogyne punctulata</i> | Gongshan | 2000 | 12.08 | 1738.42 | 78.47 | 860.43  | 0.50 | Epiphyte | Dense forest | Non-endemic |
| <i>Coelogyne punctulata</i> | Gongshan | 2000 | 12.08 | 1738.42 | 78.47 | 860.43  | 0.50 | Epiphyte | Dense forest | Non-endemic |
| <i>Coelogyne punctulata</i> | Fugong   | 2000 | 12.06 | 1441.43 | 79.99 | 906.18  | 0.63 | Epiphyte | Dense forest | Non-endemic |
| <i>Coelogyne punctulata</i> | Gongshan | 2000 | 12.08 | 1738.42 | 78.47 | 860.43  | 0.50 | Epiphyte | Dense forest | Non-endemic |
| <i>Coelogyne punctulata</i> | Maguan   | 2050 | 12.71 | 1330.52 | 83.25 | 1086.43 | 0.82 | Epiphyte | Dense forest | Non-endemic |
| <i>Coelogyne punctulata</i> | Gongshan | 2080 | 11.60 | 1738.42 | 78.47 | 860.43  | 0.50 | Epiphyte | Dense forest | Non-endemic |
| <i>Coelogyne punctulata</i> | Gongshan | 2100 | 11.48 | 1738.42 | 78.47 | 860.43  | 0.50 | Epiphyte | Dense forest | Non-endemic |
| <i>Coelogyne punctulata</i> | Jinping  | 2200 | 12.29 | 2305.17 | 83.81 | 1030.46 | 0.45 | Epiphyte | Dense forest | Non-endemic |
| <i>Coelogyne punctulata</i> | Jingdong | 2200 | 12.38 | 1128.40 | 76.80 | 1142.11 | 1.01 | Epiphyte | Dense forest | Non-endemic |
| <i>Coelogyne punctulata</i> | Wenshan  | 2200 | 12.46 | 988.87  | 76.70 | 1272.98 | 1.29 | Epiphyte | Dense forest | Non-endemic |
| <i>Coelogyne punctulata</i> | Lushui   | 2300 | 12.25 | 1195.57 | 70.63 | 911.65  | 0.76 | Epiphyte | Dense forest | Non-endemic |
| <i>Coelogyne punctulata</i> | Jingdong | 2400 | 11.18 | 1128.40 | 76.80 | 1142.11 | 1.01 | Epiphyte | Shrubland    | Non-endemic |
| <i>Coelogyne punctulata</i> | Jingdong | 2500 | 10.58 | 1128.40 | 76.80 | 1142.11 | 1.01 | Epiphyte | Dense forest | Non-endemic |
| <i>Coelogyne punctulata</i> | Longling | 2500 | 9.12  | 2098.66 | 84.65 | 973.45  | 0.46 | Epiphyte | Dense forest | Non-endemic |
| <i>Coelogyne punctulata</i> | Jingdong | 2520 | 10.46 | 1128.40 | 76.80 | 1142.11 | 1.01 | Epiphyte | Dense forest | Non-endemic |
| <i>Coelogyne punctulata</i> | Deqin    | 2600 | 9.57  | 639.48  | 70.85 | 896.66  | 1.40 | Epiphyte | Dense forest | Non-endemic |
| <i>Coelogyne punctulata</i> | Gongshan | 2650 | 8.18  | 1738.42 | 78.47 | 860.43  | 0.50 | Epiphyte | Dense forest | Non-endemic |
| <i>Coelogyne punctulata</i> | Gongshan | 2650 | 8.18  | 1738.42 | 78.47 | 860.43  | 0.50 | Epiphyte | Dense forest | Non-endemic |
| <i>Coelogyne punctulata</i> | Yongde   | 2650 | 11.23 | 1266.25 | 69.00 | 1283.63 | 1.01 | Epiphyte | Forest edge  | Non-endemic |
| <i>Coelogyne punctulata</i> | Yongde   | 2650 | 11.23 | 1266.25 | 69.00 | 1283.63 | 1.01 | Epiphyte | Forest edge  | Non-endemic |
| <i>Coelogyne punctulata</i> | Zhenkang | 2700 | 8.64  | 1602.96 | 81.14 | 1089.09 | 0.68 | Epiphyte | Dense forest | Non-endemic |
| <i>Coelogyne punctulata</i> | Gongshan | 2700 | 7.88  | 1738.42 | 78.47 | 860.43  | 0.50 | Epiphyte | Dense forest | Non-endemic |
| <i>Coelogyne punctulata</i> | Gongshan | 2700 | 7.88  | 1738.42 | 78.47 | 860.43  | 0.50 | Epiphyte | Dense forest | Non-endemic |
| <i>Coelogyne punctulata</i> | Fengqing | 2700 | 10.00 | 1352.80 | 73.24 | 1172.52 | 0.87 | Epiphyte | Dense forest | Non-endemic |
| <i>Coelogyne punctulata</i> | Zhenkang | 2750 | 8.34  | 1602.96 | 81.14 | 1089.09 | 0.68 | Epiphyte | Dense forest | Non-endemic |
| <i>Coelogyne punctulata</i> | Jingdong | 2800 | 8.78  | 1128.40 | 76.80 | 1142.11 | 1.01 | Epiphyte | Dense forest | Non-endemic |
| <i>Coelogyne punctulata</i> | Dali     | 2800 | 10.02 | 1082.70 | 68.61 | 1256.27 | 1.16 | Epiphyte | Dense forest | Non-endemic |
| <i>Coelogyne punctulata</i> | Jingdong | 2800 | 8.78  | 1128.40 | 76.80 | 1142.11 | 1.01 | Epiphyte | Forest edge  | Non-endemic |
| <i>Coelogyne punctulata</i> | Weixi    | 2900 | 8.03  | 970.70  | 69.95 | 1021.03 | 1.05 | Epiphyte | Dense forest | Non-endemic |
| <i>Coelogyne punctulata</i> | Deqin    | 2900 | 7.77  | 639.48  | 70.85 | 896.66  | 1.40 | Epiphyte | Dense forest | Non-endemic |

|                                 |             |      |       |         |       |         |      |             |               |             |
|---------------------------------|-------------|------|-------|---------|-------|---------|------|-------------|---------------|-------------|
| <i>Coelogyne punctulata</i>     | Jingdong    | 2900 | 8.18  | 1128.40 | 76.80 | 1142.11 | 1.01 | Epiphyte    | Sparse forest | Non-endemic |
| <i>Coelogyne sanderae</i>       | Zhenkang    | 1000 | 18.84 | 1602.96 | 81.14 | 1089.09 | 0.68 | Epiphyte    | Dense forest  | Non-endemic |
| <i>Coelogyne sanderae</i>       | Zhenkang    | 1200 | 17.64 | 1602.96 | 81.14 | 1089.09 | 0.68 | Epiphyte    | Dense forest  | Non-endemic |
| <i>Coelogyne sanderae</i>       | Hekou       | 1300 | 15.95 | 1768.58 | 84.25 | 1166.26 | 0.66 | Epiphyte    | Dense forest  | Non-endemic |
| <i>Coelogyne sanderae</i>       | Lancang     | 1400 | 17.30 | 1596.50 | 77.88 | 1183.80 | 0.74 | Epiphyte    | Dense forest  | Non-endemic |
| <i>Coelogyne sanderae</i>       | Zhenkang    | 1600 | 15.24 | 1602.96 | 81.14 | 1089.09 | 0.68 | Epiphyte    | Dense forest  | Non-endemic |
| <i>Coelogyne sanderae</i>       | Zhenkang    | 1640 | 15.00 | 1602.96 | 81.14 | 1089.09 | 0.68 | Epiphyte    | Dense forest  | Non-endemic |
| <i>Coelogyne sanderae</i>       | Gengma      | 1700 | 15.47 | 1327.70 | 77.28 | 1181.78 | 0.89 | Epiphyte    | Dense forest  | Non-endemic |
| <i>Coelogyne sanderae</i>       | Luxi        | 1750 | 14.58 | 1650.33 | 79.33 | 1183.39 | 0.72 | Epiphyte    | Dense forest  | Non-endemic |
| <i>Coelogyne sanderae</i>       | Cangyuan    | 1800 | 14.42 | 1733.34 | 81.63 | 1060.82 | 0.61 | Epiphyte    | Dense forest  | Non-endemic |
| <i>Coelogyne sanderae</i>       | Fengqing    | 2250 | 12.70 | 1352.80 | 73.24 | 1172.52 | 0.87 | Epiphyte    | Dense forest  | Non-endemic |
| <i>Coelogyne schultesii</i>     | Gongshan    | 1700 | 13.88 | 1738.42 | 78.47 | 860.43  | 0.50 | Epiphyte    | Shrubland     | Non-endemic |
| <i>Coelogyne suaveolens</i>     | Mengla      | 600  | 21.60 | 1514.70 | 84.25 | 1146.68 | 0.76 | Epiphyte    | Dense forest  | Non-endemic |
| <i>Coelogyne viscosa</i>        | Shuangjiang | 750  | 21.48 | 1006.64 | 75.26 | 1272.13 | 1.26 | Epiphyte    | Sparse forest | Non-endemic |
| <i>Coelogyne viscosa</i>        | Mengla      | 1000 | 19.20 | 1514.70 | 84.25 | 1146.68 | 0.76 | Epiphyte    | Dense forest  | Non-endemic |
| <i>Coelogyne viscosa</i>        | Jinghong    | 1440 | 17.08 | 1161.08 | 80.46 | 1256.19 | 1.08 | Epiphyte    | Sparse forest | Non-endemic |
| <i>Coelogyne viscosa</i>        | Zhenyuan    | 2000 | 14.24 | 1254.48 | 77.40 | 1138.06 | 0.91 | Epiphyte    | Dense forest  | Non-endemic |
| <i>Coelogyne wrymbosa</i>       | Yongde      | 1090 | 20.59 | 1266.25 | 69.00 | 1283.63 | 1.01 | Epiphyte    | Dense forest  | Non-endemic |
| <i>Collabium chinense</i>       | Pingbian    | 840  | 19.78 | 1648.57 | 86.34 | 990.16  | 0.60 | Epiphyte    | Dense forest  | Non-endemic |
| <i>Collabium formosanum</i>     | Luchun      | 1600 | 17.10 | 2013.54 | 78.64 | 1151.56 | 0.57 | Epiphyte    | Dense forest  | Non-endemic |
| <i>Collabium formosanum</i>     | Pingbian    | 1600 | 15.22 | 1648.57 | 86.34 | 990.16  | 0.60 | Terrestrial | Dense forest  | Non-endemic |
| <i>Collabium formosanum</i>     | Xichou      | 1600 | 15.33 | 1267.54 | 82.98 | 985.97  | 0.78 | Terrestrial | Dense forest  | Non-endemic |
| <i>Collabium formosanum</i>     | Xichou      | 1750 | 14.43 | 1267.54 | 82.98 | 985.97  | 0.78 | Terrestrial | Dense forest  | Non-endemic |
| <i>Collabium formosanum</i>     | Lushui      | 2200 | 12.85 | 1195.57 | 70.63 | 911.65  | 0.76 | Terrestrial | Dense forest  | Non-endemic |
| <i>Collabium formosanum</i>     | Lushui      | 2400 | 11.65 | 1195.57 | 70.63 | 911.65  | 0.76 | Terrestrial | Dense forest  | Non-endemic |
| <i>Corybas taliensis</i>        | Yongde      | 2700 | 10.93 | 1266.25 | 69.00 | 1283.63 | 1.01 | Terrestrial | Sparse forest | Non-endemic |
| <i>Corybas taliensis</i>        | Yongde      | 3060 | 8.77  | 1266.25 | 69.00 | 1283.63 | 1.01 | Terrestrial | Sparse forest | Non-endemic |
| <i>Corymborkis veratrifolia</i> | Hekou       | 150  | 22.85 | 1768.58 | 84.25 | 1166.26 | 0.66 | Terrestrial | Dense forest  | Non-endemic |
| <i>Corymborkis veratrifolia</i> | Cangyuan    | 650  | 21.32 | 1733.34 | 81.63 | 1060.82 | 0.61 | Terrestrial | Dense forest  | Non-endemic |
| <i>Corymborkis veratrifolia</i> | Maguan      | 900  | 19.61 | 1330.52 | 83.25 | 1086.43 | 0.82 | Terrestrial | Dense forest  | Non-endemic |
| <i>Corymborkis veratrifolia</i> | Jinghong    | 1000 | 19.72 | 1161.08 | 80.46 | 1256.19 | 1.08 | Terrestrial | Dense forest  | Non-endemic |
| <i>Cremastra appendiculata</i>  | Jinghong    | 540  | 22.48 | 1161.08 | 80.46 | 1256.19 | 1.08 | Terrestrial | Grassy slope  | Non-endemic |
| <i>Cremastra appendiculata</i>  | Fengqing    | 1200 | 19.00 | 1352.80 | 73.24 | 1172.52 | 0.87 | Terrestrial | Dense forest  | Non-endemic |
| <i>Cremastra appendiculata</i>  | Suijiang    | 1500 | 11.33 | 917.85  | 78.74 | 923.40  | 1.01 | Terrestrial | Dense forest  | Non-endemic |
| <i>Cremastra appendiculata</i>  | Yongshan    | 1900 | 10.30 | 665.40  | 74.22 | 968.77  | 1.46 | Terrestrial | Dense forest  | Non-endemic |
| <i>Cremastra appendiculata</i>  | Gongshan    | 2000 | 12.08 | 1738.42 | 78.47 | 860.43  | 0.50 | Terrestrial | Dense forest  | Non-endemic |

|                                        |           |      |       |         |       |         |      |             |               |             |
|----------------------------------------|-----------|------|-------|---------|-------|---------|------|-------------|---------------|-------------|
| <i>Cremastra appendiculata</i>         | Eryuan    | 2100 | 13.93 | 745.16  | 68.27 | 1210.94 | 1.63 | Terrestrial | Dense forest  | Non-endemic |
| <i>Cremastra appendiculata</i>         | Heqing    | 2200 | 13.59 | 977.00  | 65.16 | 1211.84 | 1.24 | Terrestrial | Dense forest  | Non-endemic |
| <i>Cremastra appendiculata</i>         | Yangbi    | 2300 | 12.19 | 1044.23 | 72.19 | 1161.15 | 1.11 | Terrestrial | Dense forest  | Non-endemic |
| <i>Cremastra appendiculata</i>         | Eryuan    | 2400 | 12.13 | 745.16  | 68.27 | 1210.94 | 1.63 | Terrestrial | Dense forest  | Non-endemic |
| <i>Cremastra appendiculata</i>         | Tengchong | 2600 | 9.40  | 1501.45 | 78.06 | 857.93  | 0.57 | Terrestrial | Dense forest  | Non-endemic |
| <i>Cryptochilus luteus</i>             | Malipo    | 1000 | 18.26 | 1063.54 | 85.83 | 1053.97 | 0.99 | Epiphyte    | Dense forest  | Non-endemic |
| <i>Cryptochilus luteus</i>             | Pingbian  | 1600 | 15.22 | 1648.57 | 86.34 | 990.16  | 0.60 | Epiphyte    | Dense forest  | Non-endemic |
| <i>Cryptochilus luteus</i>             | Jinping   | 1660 | 15.53 | 2305.17 | 83.81 | 1030.46 | 0.45 | Epiphyte    | Dense forest  | Non-endemic |
| <i>Cryptochilus luteus</i>             | Jinping   | 1730 | 15.11 | 2305.17 | 83.81 | 1030.46 | 0.45 | Epiphyte    | Dense forest  | Non-endemic |
| <i>Cryptochilus luteus</i>             | Malipo    | 1800 | 13.46 | 1063.54 | 85.83 | 1053.97 | 0.99 | Epiphyte    | Dense forest  | Non-endemic |
| <i>Cryptochilus luteus</i>             | Pingbian  | 1900 | 13.42 | 1648.57 | 86.34 | 990.16  | 0.60 | Epiphyte    | Dense forest  | Non-endemic |
| <i>Cryptochilus luteus</i>             | Gongshan  | 2040 | 11.84 | 1738.42 | 78.47 | 860.43  | 0.50 | Epiphyte    | Dense forest  | Non-endemic |
| <i>Cryptochilus luteus</i>             | Luchun    | 2300 | 12.90 | 2013.54 | 78.64 | 1151.56 | 0.57 | Epiphyte    | Dense forest  | Non-endemic |
| <i>Cymbidium aloifolium</i>            | Hekou     | 140  | 22.91 | 1768.58 | 84.25 | 1166.26 | 0.66 | Epiphyte    | Dense forest  | Non-endemic |
| <i>Cymbidium aloifolium</i>            | Hekou     | 150  | 22.85 | 1768.58 | 84.25 | 1166.26 | 0.66 | Epiphyte    | Dense forest  | Non-endemic |
| <i>Cymbidium aloifolium</i>            | Pingbian  | 340  | 22.78 | 1648.57 | 86.34 | 990.16  | 0.60 | Epiphyte    | Dense forest  | Non-endemic |
| <i>Cymbidium aloifolium</i>            | Jinghong  | 600  | 22.12 | 1161.08 | 80.46 | 1256.19 | 1.08 | Epiphyte    | Dense forest  | Non-endemic |
| <i>Cymbidium aloifolium</i>            | Mengla    | 680  | 21.12 | 1514.70 | 84.25 | 1146.68 | 0.76 | Epiphyte    | Dense forest  | Non-endemic |
| <i>Cymbidium aloifolium</i>            | Jinghong  | 710  | 21.46 | 1161.08 | 80.46 | 1256.19 | 1.08 | Epiphyte    | Dense forest  | Non-endemic |
| <i>Cymbidium aloifolium</i>            | Jinghong  | 840  | 20.68 | 1161.08 | 80.46 | 1256.19 | 1.08 | Epiphyte    | Dense forest  | Non-endemic |
| <i>Cymbidium aloifolium</i>            | Jinghong  | 850  | 20.62 | 1161.08 | 80.46 | 1256.19 | 1.08 | Epiphyte    | Sparse forest | Non-endemic |
| <i>Cymbidium aloifolium</i>            | Menghai   | 1000 | 19.56 | 1314.38 | 80.83 | 1150.91 | 0.88 | Epiphyte    | Dense forest  | Non-endemic |
| <i>Cymbidium bicolor subsp.obtusum</i> | Hekou     | 180  | 22.67 | 1768.58 | 84.25 | 1166.26 | 0.66 | Epiphyte    | Forest edge   | Non-endemic |
| <i>Cymbidium bicolor subsp.obtusum</i> | Hekou     | 220  | 22.43 | 1768.58 | 84.25 | 1166.26 | 0.66 | Epiphyte    | Dense forest  | Non-endemic |
| <i>Cymbidium bicolor subsp.obtusum</i> | Jinping   | 350  | 23.39 | 2305.17 | 83.81 | 1030.46 | 0.45 | Epiphyte    | Dense forest  | Non-endemic |
| <i>Cymbidium bicolor subsp.obtusum</i> | Mengla    | 560  | 21.84 | 1514.70 | 84.25 | 1146.68 | 0.76 | Epiphyte    | Sparse forest | Non-endemic |
| <i>Cymbidium bicolor subsp.obtusum</i> | Jinghong  | 650  | 21.82 | 1161.08 | 80.46 | 1256.19 | 1.08 | Epiphyte    | Forest edge   | Non-endemic |
| <i>Cymbidium bicolor subsp.obtusum</i> | Jinghong  | 700  | 21.52 | 1161.08 | 80.46 | 1256.19 | 1.08 | Epiphyte    | Shrubland     | Non-endemic |
| <i>Cymbidium bicolor subsp.obtusum</i> | Jinghong  | 850  | 20.62 | 1161.08 | 80.46 | 1256.19 | 1.08 | Epiphyte    | Dense forest  | Non-endemic |
| <i>Cymbidium bicolor subsp.obtusum</i> | Jinghong  | 850  | 20.62 | 1161.08 | 80.46 | 1256.19 | 1.08 | Epiphyte    | Dense forest  | Non-endemic |
| <i>Cymbidium bicolor subsp.obtusum</i> | Jinghong  | 1020 | 19.60 | 1161.08 | 80.46 | 1256.19 | 1.08 | Epiphyte    | Dense forest  | Non-endemic |
| <i>Cymbidium bicolor subsp.obtusum</i> | Jinghong  | 1100 | 19.12 | 1161.08 | 80.46 | 1256.19 | 1.08 | Epiphyte    | Dense forest  | Non-endemic |
| <i>Cymbidium bicolor subsp.obtusum</i> | Menghai   | 1180 | 18.48 | 1314.38 | 80.83 | 1150.91 | 0.88 | Epiphyte    | Dense forest  | Non-endemic |
| <i>Cymbidium bicolor subsp.obtusum</i> | Luchun    | 1200 | 19.50 | 2013.54 | 78.64 | 1151.56 | 0.57 | Epiphyte    | Forest edge   | Non-endemic |
| <i>Cymbidium bicolor subsp.obtusum</i> | Jingdong  | 1500 | 16.58 | 1128.40 | 76.80 | 1142.11 | 1.01 | Epiphyte    | Forest edge   | Non-endemic |
| <i>Cymbidium bicolor subsp.obtusum</i> | Zhenkang  | 1600 | 15.24 | 1602.96 | 81.14 | 1089.09 | 0.68 | Epiphyte    | Dense forest  | Non-endemic |

|                                        |          |      |       |         |       |         |      |          |               |             |
|----------------------------------------|----------|------|-------|---------|-------|---------|------|----------|---------------|-------------|
| <i>Cymbidium bicolor subsp.obtusum</i> | Menghai  | 1600 | 15.96 | 1314.38 | 80.83 | 1150.91 | 0.88 | Epiphyte | Shrubland     | Non-endemic |
| <i>Cymbidium cyperifolium</i>          | Funing   | 750  | 19.12 | 1161.58 | 79.07 | 1147.17 | 0.99 | Epiphyte | Dense forest  | Non-endemic |
| <i>Cymbidium cyperifolium</i>          | Funing   | 950  | 17.92 | 1161.58 | 79.07 | 1147.17 | 0.99 | Epiphyte | Dense forest  | Non-endemic |
| <i>Cymbidium cyperifolium</i>          | Xichou   | 1000 | 18.93 | 1267.54 | 82.98 | 985.97  | 0.78 | Epiphyte | Dense forest  | Non-endemic |
| <i>Cymbidium cyperifolium</i>          | Xichou   | 1000 | 18.93 | 1267.54 | 82.98 | 985.97  | 0.78 | Epiphyte | Sparse forest | Non-endemic |
| <i>Cymbidium cyperifolium</i>          | Yanshan  | 1200 | 18.26 | 1003.57 | 79.42 | 1172.21 | 1.17 | Epiphyte | Dense forest  | Non-endemic |
| <i>Cymbidium cyperifolium</i>          | Malipo   | 1200 | 17.06 | 1063.54 | 85.83 | 1053.97 | 0.99 | Epiphyte | Open site     | Non-endemic |
| <i>Cymbidium cyperifolium</i>          | Guangnan | 1270 | 16.63 | 1044.26 | 78.94 | 1090.35 | 1.04 | Epiphyte | Open site     | Non-endemic |
| <i>Cymbidium cyperifolium</i>          | Maguan   | 1300 | 17.21 | 1330.52 | 83.25 | 1086.43 | 0.82 | Epiphyte | Dense forest  | Non-endemic |
| <i>Cymbidium cyperifolium</i>          | Pingbian | 1400 | 16.42 | 1648.57 | 86.34 | 990.16  | 0.60 | Epiphyte | Dense forest  | Non-endemic |
| <i>Cymbidium cyperifolium</i>          | Malipo   | 1400 | 15.86 | 1063.54 | 85.83 | 1053.97 | 0.99 | Epiphyte | Dense forest  | Non-endemic |
| <i>Cymbidium cyperifolium</i>          | Xichou   | 1450 | 16.23 | 1267.54 | 82.98 | 985.97  | 0.78 | Epiphyte | Dense forest  | Non-endemic |
| <i>Cymbidium cyperifolium</i>          | Pingbian | 1500 | 15.82 | 1648.57 | 86.34 | 990.16  | 0.60 | Epiphyte | Dense forest  | Non-endemic |
| <i>Cymbidium cyperifolium</i>          | Malipo   | 1500 | 15.26 | 1063.54 | 85.83 | 1053.97 | 0.99 | Epiphyte | Dense forest  | Non-endemic |
| <i>Cymbidium cyperifolium</i>          | Xichou   | 1550 | 15.63 | 1267.54 | 82.98 | 985.97  | 0.78 | Epiphyte | Dense forest  | Non-endemic |
| <i>Cymbidium cyperifolium</i>          | Malipo   | 1600 | 14.66 | 1063.54 | 85.83 | 1053.97 | 0.99 | Epiphyte | Dense forest  | Non-endemic |
| <i>Cymbidium cyperifolium</i>          | Mengzi   | 1600 | 16.86 | 855.35  | 71.82 | 1434.56 | 1.68 | Epiphyte | Open site     | Non-endemic |
| <i>Cymbidium cyperifolium</i>          | Malipo   | 1700 | 14.06 | 1063.54 | 85.83 | 1053.97 | 0.99 | Epiphyte | Sparse forest | Non-endemic |
| <i>Cymbidium cyperifolium</i>          | Mengzi   | 1745 | 15.99 | 855.35  | 71.82 | 1434.56 | 1.68 | Epiphyte | Dense forest  | Non-endemic |
| <i>Cymbidium cyperifolium</i>          | Nanjian  | 2378 | 13.31 | 735.93  | 63.17 | 1535.84 | 2.09 | Epiphyte | Dense forest  | Non-endemic |
| <i>Cymbidium dayanum</i>               | Gongshan | 1700 | 13.88 | 1738.42 | 78.47 | 860.43  | 0.50 | Epiphyte | Sparse forest | Non-endemic |
| <i>Cymbidium dayanum</i>               | Yongde   | 2690 | 10.99 | 1266.25 | 69.00 | 1283.63 | 1.01 | Epiphyte | Sparse forest | Non-endemic |
| <i>Cymbidium eburneum</i>              | Fengqing | 2000 | 14.20 | 1352.80 | 73.24 | 1172.52 | 0.87 | Epiphyte | Forest edge   | Non-endemic |
| <i>Cymbidium eburneum</i>              | Jingdong | 2100 | 12.98 | 1128.40 | 76.80 | 1142.11 | 1.01 | Epiphyte | Forest edge   | Non-endemic |
| <i>Cymbidium elegans</i>               | Gongshan | 1700 | 13.88 | 1738.42 | 78.47 | 860.43  | 0.50 | Epiphyte | Dense forest  | Non-endemic |
| <i>Cymbidium elegans</i>               | Wenshan  | 1700 | 15.46 | 988.87  | 76.70 | 1272.98 | 1.29 | Epiphyte | Sparse forest | Non-endemic |
| <i>Cymbidium elegans</i>               | Gongshan | 1800 | 13.28 | 1738.42 | 78.47 | 860.43  | 0.50 | Epiphyte | Sparse forest | Non-endemic |
| <i>Cymbidium elegans</i>               | Jingdong | 1900 | 14.18 | 1128.40 | 76.80 | 1142.11 | 1.01 | Epiphyte | Dense forest  | Non-endemic |
| <i>Cymbidium elegans</i>               | Gongshan | 1900 | 12.68 | 1738.42 | 78.47 | 860.43  | 0.50 | Epiphyte | Dense forest  | Non-endemic |
| <i>Cymbidium elegans</i>               | Fugong   | 2000 | 12.06 | 1441.43 | 79.99 | 906.18  | 0.63 | Epiphyte | Dense forest  | Non-endemic |
| <i>Cymbidium elegans</i>               | Luchun   | 2100 | 14.10 | 2013.54 | 78.64 | 1151.56 | 0.57 | Epiphyte | Dense forest  | Non-endemic |
| <i>Cymbidium elegans</i>               | Pingbian | 2100 | 12.22 | 1648.57 | 86.34 | 990.16  | 0.60 | Epiphyte | Sparse forest | Non-endemic |
| <i>Cymbidium elegans</i>               | Gongshan | 2200 | 10.88 | 1738.42 | 78.47 | 860.43  | 0.50 | Epiphyte | Dense forest  | Non-endemic |
| <i>Cymbidium elegans</i>               | Gongshan | 2200 | 10.88 | 1738.42 | 78.47 | 860.43  | 0.50 | Epiphyte | Dense forest  | Non-endemic |
| <i>Cymbidium elegans</i>               | Jinping  | 2400 | 11.09 | 2305.17 | 83.81 | 1030.46 | 0.45 | Epiphyte | Dense forest  | Non-endemic |
| <i>Cymbidium elegans</i>               | Fugong   | 2800 | 7.26  | 1441.43 | 79.99 | 906.18  | 0.63 | Epiphyte | Dense forest  | Non-endemic |



|                             |            |      |       |         |       |         |      |             |               |             |
|-----------------------------|------------|------|-------|---------|-------|---------|------|-------------|---------------|-------------|
| <i>Cymbidium elegans</i>    | Jingdong   | 2900 | 8.18  | 1128.40 | 76.80 | 1142.11 | 1.01 | Epiphyte    | Dense forest  | Non-endemic |
| <i>Cymbidium elegans</i>    | Jingdong   | 2600 | 9.98  | 1128.40 | 76.80 | 1142.11 | 1.01 | Epiphyte    | Sparse forest | Non-endemic |
| <i>Cymbidium elegans</i>    | Lincang    | 2650 | 10.62 | 1165.84 | 72.08 | 1167.73 | 1.00 | Epiphyte    | Dense forest  | Non-endemic |
| <i>Cymbidium ensifolium</i> | Mengla     | 500  | 22.20 | 1514.70 | 84.25 | 1146.68 | 0.76 | Terrestrial | Dense forest  | Non-endemic |
| <i>Cymbidium ensifolium</i> | Mengla     | 600  | 21.60 | 1514.70 | 84.25 | 1146.68 | 0.76 | Terrestrial | Dense forest  | Non-endemic |
| <i>Cymbidium ensifolium</i> | Funing     | 700  | 19.42 | 1161.58 | 79.07 | 1147.17 | 0.99 | Terrestrial | Dense forest  | Non-endemic |
| <i>Cymbidium ensifolium</i> | Menghai    | 1100 | 18.96 | 1314.38 | 80.83 | 1150.91 | 0.88 | Terrestrial | Dense forest  | Non-endemic |
| <i>Cymbidium ensifolium</i> | Menghai    | 1180 | 18.48 | 1314.38 | 80.83 | 1150.91 | 0.88 | Terrestrial | Dense forest  | Non-endemic |
| <i>Cymbidium ensifolium</i> | Menghai    | 1200 | 18.36 | 1314.38 | 80.83 | 1150.91 | 0.88 | Terrestrial | Sparse forest | Non-endemic |
| <i>Cymbidium ensifolium</i> | Guangnan   | 1250 | 16.75 | 1044.26 | 78.94 | 1090.35 | 1.04 | Terrestrial | Shrubland     | Non-endemic |
| <i>Cymbidium ensifolium</i> | Guangnan   | 1250 | 16.75 | 1044.26 | 78.94 | 1090.35 | 1.04 | Terrestrial | Shrubland     | Non-endemic |
| <i>Cymbidium ensifolium</i> | Menghai    | 1300 | 17.76 | 1314.38 | 80.83 | 1150.91 | 0.88 | Terrestrial | Dense forest  | Non-endemic |
| <i>Cymbidium ensifolium</i> | Menghai    | 1300 | 17.76 | 1314.38 | 80.83 | 1150.91 | 0.88 | Terrestrial | Sparse forest | Non-endemic |
| <i>Cymbidium ensifolium</i> | Pingbian   | 1400 | 16.42 | 1648.57 | 86.34 | 990.16  | 0.60 | Terrestrial | Dense forest  | Non-endemic |
| <i>Cymbidium ensifolium</i> | Jingdong   | 1600 | 15.98 | 1128.40 | 76.80 | 1142.11 | 1.01 | Terrestrial | Dense forest  | Non-endemic |
| <i>Cymbidium ensifolium</i> | Jingdong   | 2100 | 12.98 | 1128.40 | 76.80 | 1142.11 | 1.01 | Terrestrial | Dense forest  | Non-endemic |
| <i>Cymbidium ensifolium</i> | Jingdong   | 2500 | 10.58 | 1128.40 | 76.80 | 1142.11 | 1.01 | Terrestrial | Dense forest  | Non-endemic |
| <i>Cymbidium ensifolium</i> | Jingdong   | 2500 | 10.58 | 1128.40 | 76.80 | 1142.11 | 1.01 | Terrestrial | Grassy slope  | Non-endemic |
| <i>Cymbidium ensifolium</i> | Deqin      | 3300 | 5.37  | 639.48  | 70.85 | 896.66  | 1.40 | Terrestrial | Grassy slope  | Non-endemic |
| <i>Cymbidium erythraeum</i> | Xichou     | 1490 | 15.99 | 1267.54 | 82.98 | 985.97  | 0.78 | Epiphyte    | Dense forest  | Non-endemic |
| <i>Cymbidium erythraeum</i> | Pingbian   | 1500 | 15.82 | 1648.57 | 86.34 | 990.16  | 0.60 | Epiphyte    | Grassy slope  | Non-endemic |
| <i>Cymbidium erythraeum</i> | Gongshan   | 1700 | 13.88 | 1738.42 | 78.47 | 860.43  | 0.50 | Epiphyte    | Sparse forest | Non-endemic |
| <i>Cymbidium erythraeum</i> | Jiangchuan | 1750 | 15.50 | 872.74  | 74.72 | 1181.99 | 1.35 | Epiphyte    | Dense forest  | Non-endemic |
| <i>Cymbidium erythraeum</i> | Jinghong   | 1800 | 14.92 | 1161.08 | 80.46 | 1256.19 | 1.08 | Epiphyte    | Dense forest  | Non-endemic |
| <i>Cymbidium erythraeum</i> | Eshan      | 1800 | 14.41 | 938.39  | 78.62 | 1123.48 | 1.20 | Epiphyte    | Forest edge   | Non-endemic |
| <i>Cymbidium erythraeum</i> | Yuanjiang  | 1850 | 15.08 | 805.59  | 69.08 | 1652.32 | 2.05 | Epiphyte    | Dense forest  | Non-endemic |
| <i>Cymbidium erythraeum</i> | Fuming     | 2100 | 13.37 | 871.62  | 71.93 | 1209.56 | 1.39 | Epiphyte    | Dense forest  | Non-endemic |
| <i>Cymbidium erythraeum</i> | Yongde     | 2400 | 12.73 | 1266.25 | 69.00 | 1283.63 | 1.01 | Epiphyte    | Grassy slope  | Non-endemic |
| <i>Cymbidium erythraeum</i> | Lincang    | 2800 | 9.72  | 1165.84 | 72.08 | 1167.73 | 1.00 | Epiphyte    | Dense forest  | Non-endemic |
| <i>Cymbidium faberi</i>     | Gongshan   | 2000 | 12.08 | 1738.42 | 78.47 | 860.43  | 0.50 | Terrestrial | Dense forest  | Non-endemic |
| <i>Cymbidium faberi</i>     | Gongshan   | 2120 | 11.36 | 1738.42 | 78.47 | 860.43  | 0.50 | Terrestrial | Dense forest  | Non-endemic |
| <i>Cymbidium faberi</i>     | Lijiang    | 2160 | 14.11 | 982.53  | 63.24 | 1077.65 | 1.10 | Terrestrial | Dense forest  | Non-endemic |
| <i>Cymbidium faberi</i>     | Kunming    | 2200 | 13.08 | 1019.14 | 72.30 | 1197.62 | 1.18 | Terrestrial | Dense forest  | Non-endemic |
| <i>Cymbidium faberi</i>     | Weixi      | 2560 | 10.07 | 970.70  | 69.95 | 1021.03 | 1.05 | Terrestrial | Dense forest  | Non-endemic |
| <i>Cymbidium faberi</i>     | Deqin      | 2700 | 8.97  | 639.48  | 70.85 | 896.66  | 1.40 | Terrestrial | Dense forest  | Non-endemic |
| <i>Cymbidium faberi</i>     | Weixi      | 3000 | 7.43  | 970.70  | 69.95 | 1021.03 | 1.05 | Terrestrial | Dense forest  | Non-endemic |

|                                                 |           |      |       |         |       |         |      |             |               |             |
|-------------------------------------------------|-----------|------|-------|---------|-------|---------|------|-------------|---------------|-------------|
| <i>Cymbidium faberi</i>                         | Zhongdian | 3240 | 6.00  | 641.73  | 69.05 | 914.89  | 1.43 | Terrestrial | Shrubland     | Non-endemic |
| <i>Cymbidium floribundum</i>                    | Guangnan  | 800  | 19.45 | 1044.26 | 78.94 | 1090.35 | 1.04 | Epiphyte    | Shrubland     | Non-endemic |
| <i>Cymbidium floribundum</i>                    | Funing    | 1000 | 17.62 | 1161.58 | 79.07 | 1147.17 | 0.99 | Epiphyte    | Sparse forest | Non-endemic |
| <i>Cymbidium floribundum</i>                    | Yanshan   | 1200 | 18.26 | 1003.57 | 79.42 | 1172.21 | 1.17 | Epiphyte    | Dense forest  | Non-endemic |
| <i>Cymbidium floribundum</i>                    | Menghai   | 1300 | 17.76 | 1314.38 | 80.83 | 1150.91 | 0.88 | Epiphyte    | Sparse forest | Non-endemic |
| <i>Cymbidium floribundum</i>                    | Xichou    | 1300 | 17.13 | 1267.54 | 82.98 | 985.97  | 0.78 | Epiphyte    | Sparse forest | Non-endemic |
| <i>Cymbidium floribundum</i>                    | Guangnan  | 1360 | 16.09 | 1044.26 | 78.94 | 1090.35 | 1.04 | Epiphyte    | Sparse forest | Non-endemic |
| <i>Cymbidium floribundum</i>                    | Malipo    | 1500 | 15.26 | 1063.54 | 85.83 | 1053.97 | 0.99 | Epiphyte    | Dense forest  | Non-endemic |
| <i>Cymbidium floribundum</i>                    | Xichou    | 1500 | 15.93 | 1267.54 | 82.98 | 985.97  | 0.78 | Epiphyte    | Dense forest  | Non-endemic |
| <i>Cymbidium floribundum</i>                    | Wenshan   | 1950 | 13.96 | 988.87  | 76.70 | 1272.98 | 1.29 | Epiphyte    | Dense forest  | Non-endemic |
| <i>Cymbidium floribundum</i>                    | Deqin     | 2000 | 13.17 | 639.48  | 70.85 | 896.66  | 1.40 | Epiphyte    | Dense forest  | Non-endemic |
| <i>Cymbidium floribundum</i>                    | Fugong    | 2000 | 12.06 | 1441.43 | 79.99 | 906.18  | 0.63 | Epiphyte    | Dense forest  | Non-endemic |
| <i>Cymbidium floribundum</i>                    | Weixi     | 2000 | 13.43 | 970.70  | 69.95 | 1021.03 | 1.05 | Epiphyte    | Dense forest  | Non-endemic |
| <i>Cymbidium floribundum</i>                    | Gongshan  | 2000 | 12.08 | 1738.42 | 78.47 | 860.43  | 0.50 | Epiphyte    | Shrubland     | Non-endemic |
| <i>Cymbidium floribundum</i>                    | Weixi     | 2000 | 13.43 | 970.70  | 69.95 | 1021.03 | 1.05 | Epiphyte    | Sparse forest | Non-endemic |
| <i>Cymbidium floribundum</i>                    | Gongshan  | 2300 | 10.28 | 1738.42 | 78.47 | 860.43  | 0.50 | Epiphyte    | Dense forest  | Non-endemic |
| <i>Cymbidium floribundum</i>                    | Weixi     | 2300 | 11.63 | 970.70  | 69.95 | 1021.03 | 1.05 | Epiphyte    | Dense forest  | Non-endemic |
| <i>Cymbidium floribundum</i>                    | Lijiang   | 2400 | 12.67 | 982.53  | 63.24 | 1077.65 | 1.10 | Epiphyte    | Open site     | Non-endemic |
| <i>Cymbidium floribundum</i>                    | Zhongdian | 2450 | 10.74 | 641.73  | 69.05 | 914.89  | 1.43 | Epiphyte    | Dense forest  | Non-endemic |
| <i>Cymbidium floribundum</i>                    | Gongshan  | 2500 | 9.08  | 1738.42 | 78.47 | 860.43  | 0.50 | Epiphyte    | Dense forest  | Non-endemic |
| <i>Cymbidium floribundum</i>                    | Gongshan  | 2500 | 9.08  | 1738.42 | 78.47 | 860.43  | 0.50 | Epiphyte    | Dense forest  | Non-endemic |
| <i>Cymbidium floribundum</i>                    | Gongshan  | 2600 | 8.48  | 1738.42 | 78.47 | 860.43  | 0.50 | Epiphyte    | Dense forest  | Non-endemic |
| <i>Cymbidium floribundum</i>                    | Deqin     | 2600 | 9.57  | 639.48  | 70.85 | 896.66  | 1.40 | Epiphyte    | Dense forest  | Non-endemic |
| <i>Cymbidium floribundum</i>                    | Deqin     | 2600 | 9.57  | 639.48  | 70.85 | 896.66  | 1.40 | Epiphyte    | Sparse forest | Non-endemic |
| <i>Cymbidium floribundum</i>                    | Gongshan  | 2700 | 7.88  | 1738.42 | 78.47 | 860.43  | 0.50 | Epiphyte    | Dense forest  | Non-endemic |
| <i>Cymbidium floribundum</i>                    | Gongshan  | 2900 | 6.68  | 1738.42 | 78.47 | 860.43  | 0.50 | Epiphyte    | Dense forest  | Non-endemic |
| <i>Cymbidium goeringii</i>                      | Guangnan  | 1330 | 16.27 | 1044.26 | 78.94 | 1090.35 | 1.04 | Terrestrial | Dense forest  | Non-endemic |
| <i>Cymbidium goeringii</i>                      | Yongde    | 1600 | 17.53 | 1266.25 | 69.00 | 1283.63 | 1.01 | Terrestrial | Dense forest  | Non-endemic |
| <i>Cymbidium goeringii</i>                      | Nanjian   | 1980 | 15.69 | 735.93  | 63.17 | 1535.84 | 2.09 | Terrestrial | Dense forest  | Non-endemic |
| <i>Cymbidium goeringii</i> var. <i>serratum</i> | Kunming   | 1900 | 14.88 | 1019.14 | 72.30 | 1197.62 | 1.18 | Terrestrial | Dense forest  | Non-endemic |
| <i>Cymbidium hookerianum</i>                    | Pingbian  | 1040 | 18.58 | 1648.57 | 86.34 | 990.16  | 0.60 | Epiphyte    | Sparse forest | Non-endemic |
| <i>Cymbidium hookerianum</i>                    | Jinping   | 1060 | 19.13 | 2305.17 | 83.81 | 1030.46 | 0.45 | Epiphyte    | Dense forest  | Non-endemic |
| <i>Cymbidium hookerianum</i>                    | Hekou     | 1200 | 16.55 | 1768.58 | 84.25 | 1166.26 | 0.66 | Epiphyte    | Sparse forest | Non-endemic |
| <i>Cymbidium hookerianum</i>                    | Pingbian  | 1300 | 17.02 | 1648.57 | 86.34 | 990.16  | 0.60 | Epiphyte    | Forest edge   | Non-endemic |
| <i>Cymbidium hookerianum</i>                    | Menghai   | 1300 | 17.76 | 1314.38 | 80.83 | 1150.91 | 0.88 | Epiphyte    | Forest edge   | Non-endemic |
| <i>Cymbidium hookerianum</i>                    | Menghai   | 1350 | 17.46 | 1314.38 | 80.83 | 1150.91 | 0.88 | Epiphyte    | Dense forest  | Non-endemic |

|                              |             |      |       |         |       |         |      |          |               |             |
|------------------------------|-------------|------|-------|---------|-------|---------|------|----------|---------------|-------------|
| <i>Cymbidium hookerianum</i> | Gongshan    | 1400 | 15.68 | 1738.42 | 78.47 | 860.43  | 0.50 | Epiphyte | Dense forest  | Non-endemic |
| <i>Cymbidium hookerianum</i> | Shuangjiang | 1400 | 17.58 | 1006.64 | 75.26 | 1272.13 | 1.26 | Epiphyte | Dense forest  | Non-endemic |
| <i>Cymbidium hookerianum</i> | Gongshan    | 1400 | 15.68 | 1738.42 | 78.47 | 860.43  | 0.50 | Epiphyte | Dense forest  | Non-endemic |
| <i>Cymbidium hookerianum</i> | Cangyuan    | 1500 | 16.22 | 1733.34 | 81.63 | 1060.82 | 0.61 | Epiphyte | Dense forest  | Non-endemic |
| <i>Cymbidium hookerianum</i> | Gongshan    | 1500 | 15.08 | 1738.42 | 78.47 | 860.43  | 0.50 | Epiphyte | Dense forest  | Non-endemic |
| <i>Cymbidium hookerianum</i> | Gongshan    | 1700 | 13.88 | 1738.42 | 78.47 | 860.43  | 0.50 | Epiphyte | Shrubland     | Non-endemic |
| <i>Cymbidium hookerianum</i> | Longling    | 1800 | 13.32 | 2098.66 | 84.65 | 973.45  | 0.46 | Epiphyte | Dense forest  | Non-endemic |
| <i>Cymbidium hookerianum</i> | Gongshan    | 1800 | 13.28 | 1738.42 | 78.47 | 860.43  | 0.50 | Epiphyte | Dense forest  | Non-endemic |
| <i>Cymbidium hookerianum</i> | Gongshan    | 1800 | 13.28 | 1738.42 | 78.47 | 860.43  | 0.50 | Epiphyte | Dense forest  | Non-endemic |
| <i>Cymbidium hookerianum</i> | Wenshan     | 1800 | 14.86 | 988.87  | 76.70 | 1272.98 | 1.29 | Epiphyte | Sparse forest | Non-endemic |
| <i>Cymbidium hookerianum</i> | Gongshan    | 1880 | 12.80 | 1738.42 | 78.47 | 860.43  | 0.50 | Epiphyte | Dense forest  | Non-endemic |
| <i>Cymbidium hookerianum</i> | Jingdong    | 1900 | 14.18 | 1128.40 | 76.80 | 1142.11 | 1.01 | Epiphyte | Dense forest  | Non-endemic |
| <i>Cymbidium hookerianum</i> | Jingdong    | 2100 | 12.98 | 1128.40 | 76.80 | 1142.11 | 1.01 | Epiphyte | Dense forest  | Non-endemic |
| <i>Cymbidium hookerianum</i> | Gongshan    | 2100 | 11.48 | 1738.42 | 78.47 | 860.43  | 0.50 | Epiphyte | Dense forest  | Non-endemic |
| <i>Cymbidium hookerianum</i> | Nanjian     | 2171 | 14.55 | 735.93  | 63.17 | 1535.84 | 2.09 | Epiphyte | Sparse forest | Non-endemic |
| <i>Cymbidium hookerianum</i> | Pingbian    | 2180 | 11.74 | 1648.57 | 86.34 | 990.16  | 0.60 | Epiphyte | Shrubland     | Non-endemic |
| <i>Cymbidium hookerianum</i> | Gongshan    | 2200 | 10.88 | 1738.42 | 78.47 | 860.43  | 0.50 | Epiphyte | Dense forest  | Non-endemic |
| <i>Cymbidium hookerianum</i> | Gongshan    | 2200 | 10.88 | 1738.42 | 78.47 | 860.43  | 0.50 | Epiphyte | Dense forest  | Non-endemic |
| <i>Cymbidium hookerianum</i> | Gongshan    | 2300 | 10.28 | 1738.42 | 78.47 | 860.43  | 0.50 | Epiphyte | Dense forest  | Non-endemic |
| <i>Cymbidium hookerianum</i> | Yongde      | 2600 | 11.53 | 1266.25 | 69.00 | 1283.63 | 1.01 | Epiphyte | Dense forest  | Non-endemic |
| <i>Cymbidium hookerianum</i> | Gongshan    | 3000 | 6.08  | 1738.42 | 78.47 | 860.43  | 0.50 | Epiphyte | Dense forest  | Non-endemic |
| <i>Cymbidium iridioides</i>  | Luchun      | 750  | 22.20 | 2013.54 | 78.64 | 1151.56 | 0.57 | Epiphyte | Dense forest  | Non-endemic |
| <i>Cymbidium iridioides</i>  | Yanshan     | 1100 | 18.86 | 1003.57 | 79.42 | 1172.21 | 1.17 | Epiphyte | Dense forest  | Non-endemic |
| <i>Cymbidium iridioides</i>  | Cangyuan    | 1150 | 18.32 | 1733.34 | 81.63 | 1060.82 | 0.61 | Epiphyte | Dense forest  | Non-endemic |
| <i>Cymbidium iridioides</i>  | Pingbian    | 1300 | 17.02 | 1648.57 | 86.34 | 990.16  | 0.60 | Epiphyte | Dense forest  | Non-endemic |
| <i>Cymbidium iridioides</i>  | Yuanyang    | 1300 | 18.51 | 1100.28 | 77.18 | 1242.17 | 1.13 | Epiphyte | Sparse forest | Non-endemic |
| <i>Cymbidium iridioides</i>  | Malipo      | 1500 | 15.26 | 1063.54 | 85.83 | 1053.97 | 0.99 | Epiphyte | Dense forest  | Non-endemic |
| <i>Cymbidium iridioides</i>  | Longling    | 1600 | 14.52 | 2098.66 | 84.65 | 973.45  | 0.46 | Epiphyte | Dense forest  | Non-endemic |
| <i>Cymbidium iridioides</i>  | Gongshan    | 1600 | 14.48 | 1738.42 | 78.47 | 860.43  | 0.50 | Epiphyte | Forest edge   | Non-endemic |
| <i>Cymbidium iridioides</i>  | Zhenkang    | 1640 | 15.00 | 1602.96 | 81.14 | 1089.09 | 0.68 | Epiphyte | Sparse forest | Non-endemic |
| <i>Cymbidium iridioides</i>  | Menghai     | 1650 | 15.66 | 1314.38 | 80.83 | 1150.91 | 0.88 | Epiphyte | Sparse forest | Non-endemic |
| <i>Cymbidium iridioides</i>  | Pingbian    | 1700 | 14.62 | 1648.57 | 86.34 | 990.16  | 0.60 | Epiphyte | Dense forest  | Non-endemic |
| <i>Cymbidium iridioides</i>  | Tengchong   | 1750 | 14.50 | 1501.45 | 78.06 | 857.93  | 0.57 | Epiphyte | Shrubland     | Non-endemic |
| <i>Cymbidium iridioides</i>  | Tengchong   | 1800 | 14.20 | 1501.45 | 78.06 | 857.93  | 0.57 | Epiphyte | Sparse forest | Non-endemic |
| <i>Cymbidium iridioides</i>  | Jianshui    | 2000 | 14.55 | 793.10  | 71.73 | 1413.81 | 1.78 | Epiphyte | Dense forest  | Non-endemic |
| <i>Cymbidium iridioides</i>  | Gongshan    | 2000 | 12.08 | 1738.42 | 78.47 | 860.43  | 0.50 | Epiphyte | Dense forest  | Non-endemic |

|                              |           |      |       |         |       |         |      |             |               |             |
|------------------------------|-----------|------|-------|---------|-------|---------|------|-------------|---------------|-------------|
| <i>Cymbidium iridioides</i>  | Lijiang   | 2100 | 14.47 | 982.53  | 63.24 | 1077.65 | 1.10 | Epiphyte    | Dense forest  | Non-endemic |
| <i>Cymbidium iridioides</i>  | Jingdong  | 2100 | 12.98 | 1128.40 | 76.80 | 1142.11 | 1.01 | Epiphyte    | Sparse forest | Non-endemic |
| <i>Cymbidium iridioides</i>  | Gongshan  | 2200 | 10.88 | 1738.42 | 78.47 | 860.43  | 0.50 | Epiphyte    | Dense forest  | Non-endemic |
| <i>Cymbidium iridioides</i>  | Gongshan  | 2200 | 10.88 | 1738.42 | 78.47 | 860.43  | 0.50 | Epiphyte    | Forest edge   | Non-endemic |
| <i>Cymbidium iridioides</i>  | Gongshan  | 2200 | 10.88 | 1738.42 | 78.47 | 860.43  | 0.50 | Epiphyte    | Forest edge   | Non-endemic |
| <i>Cymbidium iridioides</i>  | Gongshan  | 2200 | 10.88 | 1738.42 | 78.47 | 860.43  | 0.50 | Epiphyte    | Sparse forest | Non-endemic |
| <i>Cymbidium iridioides</i>  | Fugong    | 2300 | 10.26 | 1441.43 | 79.99 | 906.18  | 0.63 | Epiphyte    | Sparse forest | Non-endemic |
| <i>Cymbidium iridioides</i>  | Gongshan  | 2500 | 9.08  | 1738.42 | 78.47 | 860.43  | 0.50 | Epiphyte    | Forest edge   | Non-endemic |
| <i>Cymbidium iridioides</i>  | Jingdong  | 2600 | 9.98  | 1128.40 | 76.80 | 1142.11 | 1.01 | Epiphyte    | Grassy slope  | Non-endemic |
| <i>Cymbidium iridioides</i>  | Deqin     | 2700 | 8.97  | 639.48  | 70.85 | 896.66  | 1.40 | Epiphyte    | Forest edge   | Non-endemic |
| <i>Cymbidium kanran</i>      | Pingbian  | 1500 | 15.82 | 1648.57 | 86.34 | 990.16  | 0.60 | Terrestrial | Dense forest  | Non-endemic |
| <i>Cymbidium kanran</i>      | Gongshan  | 2000 | 12.08 | 1738.42 | 78.47 | 860.43  | 0.50 | Terrestrial | Dense forest  | Non-endemic |
| <i>Cymbidium kanran</i>      | Gongshan  | 2100 | 11.48 | 1738.42 | 78.47 | 860.43  | 0.50 | Terrestrial | Dense forest  | Non-endemic |
| <i>Cymbidium kanran</i>      | Kunming   | 2300 | 12.48 | 1019.14 | 72.30 | 1197.62 | 1.18 | Terrestrial | Dense forest  | Non-endemic |
| <i>Cymbidium lancifolium</i> | Xichou    | 870  | 19.71 | 1267.54 | 82.98 | 985.97  | 0.78 | Terrestrial | Dense forest  | Non-endemic |
| <i>Cymbidium lancifolium</i> | Yanshan   | 1100 | 18.86 | 1003.57 | 79.42 | 1172.21 | 1.17 | Terrestrial | Dense forest  | Non-endemic |
| <i>Cymbidium lancifolium</i> | Yanshan   | 1200 | 18.26 | 1003.57 | 79.42 | 1172.21 | 1.17 | Terrestrial | Dense forest  | Non-endemic |
| <i>Cymbidium lancifolium</i> | Yongde    | 1300 | 19.33 | 1266.25 | 69.00 | 1283.63 | 1.01 | Terrestrial | Dense forest  | Non-endemic |
| <i>Cymbidium lancifolium</i> | Yuanyang  | 1300 | 18.51 | 1100.28 | 77.18 | 1242.17 | 1.13 | Terrestrial | Dense forest  | Non-endemic |
| <i>Cymbidium lancifolium</i> | Pingbian  | 1400 | 16.42 | 1648.57 | 86.34 | 990.16  | 0.60 | Terrestrial | Dense forest  | Non-endemic |
| <i>Cymbidium lancifolium</i> | Gongshan  | 1450 | 15.38 | 1738.42 | 78.47 | 860.43  | 0.50 | Terrestrial | Shrubland     | Non-endemic |
| <i>Cymbidium lancifolium</i> | Xichou    | 1500 | 15.93 | 1267.54 | 82.98 | 985.97  | 0.78 | terrestrial | Dense forest  | Non-endemic |
| <i>Cymbidium lancifolium</i> | Xichou    | 1500 | 15.93 | 1267.54 | 82.98 | 985.97  | 0.78 | Terrestrial | Dense forest  | Non-endemic |
| <i>Cymbidium lancifolium</i> | Xichou    | 1600 | 15.33 | 1267.54 | 82.98 | 985.97  | 0.78 | Terrestrial | Dense forest  | Non-endemic |
| <i>Cymbidium lancifolium</i> | Gongshan  | 2000 | 12.08 | 1738.42 | 78.47 | 860.43  | 0.50 | Terrestrial | Dense forest  | Non-endemic |
| <i>Cymbidium lancifolium</i> | Weixi     | 2200 | 12.23 | 970.70  | 69.95 | 1021.03 | 1.05 | Terrestrial | Dense forest  | Non-endemic |
| <i>Cymbidium lowianum</i>    | Menghai   | 1540 | 16.32 | 1314.38 | 80.83 | 1150.91 | 0.88 | Epiphyte    | Dense forest  | Non-endemic |
| <i>Cymbidium lowianum</i>    | Mengla    | 1800 | 14.40 | 1514.70 | 84.25 | 1146.68 | 0.76 | Epiphyte    | Dense forest  | Non-endemic |
| <i>Cymbidium lowianum</i>    | Wenshan   | 1950 | 13.96 | 988.87  | 76.70 | 1272.98 | 1.29 | Epiphyte    | Dense forest  | Non-endemic |
| <i>Cymbidium macrorhizon</i> | Dongchuan | 1700 | 15.63 | 1021.73 | 71.65 | 1186.61 | 1.16 | Saprophyte  | Dense forest  | Non-endemic |
| <i>Cymbidium mastersii</i>   | Jinghong  | 1650 | 15.82 | 1161.08 | 80.46 | 1256.19 | 1.08 | Epiphyte    | Sparse forest | Non-endemic |
| <i>Cymbidium qiubeiense</i>  | Xichou    | 1500 | 15.93 | 1267.54 | 82.98 | 985.97  | 0.78 | Epiphyte    | Dense forest  | Endemic     |
| <i>Cymbidium qiubeiense</i>  | Wenshan   | 1800 | 14.86 | 988.87  | 76.70 | 1272.98 | 1.29 | Epiphyte    | Dense forest  | Endemic     |
| <i>Cymbidium sinense</i>     | Jinghong  | 800  | 20.92 | 1161.08 | 80.46 | 1256.19 | 1.08 | Terrestrial | Dense forest  | Non-endemic |
| <i>Cymbidium sinense</i>     | Jinghong  | 1000 | 19.72 | 1161.08 | 80.46 | 1256.19 | 1.08 | Terrestrial | Dense forest  | Non-endemic |
| <i>Cymbidium sinense</i>     | Xichou    | 1000 | 18.93 | 1267.54 | 82.98 | 985.97  | 0.78 | Terrestrial | Shrubland     | Non-endemic |

|                                  |           |      |       |         |       |         |      |             |               |             |
|----------------------------------|-----------|------|-------|---------|-------|---------|------|-------------|---------------|-------------|
| <i>Cymbidium sinense</i>         | Xichou    | 1200 | 17.73 | 1267.54 | 82.98 | 985.97  | 0.78 | Terrestrial | Dense forest  | Non-endemic |
| <i>Cymbidium sinense</i>         | Xichou    | 1200 | 17.73 | 1267.54 | 82.98 | 985.97  | 0.78 | Terrestrial | Dense forest  | Non-endemic |
| <i>Cymbidium sinense</i>         | Funing    | 1260 | 16.06 | 1161.58 | 79.07 | 1147.17 | 0.99 | Terrestrial | Dense forest  | Non-endemic |
| <i>Cymbidium sinense</i>         | Xichou    | 1600 | 15.33 | 1267.54 | 82.98 | 985.97  | 0.78 | Terrestrial | Dense forest  | Non-endemic |
| <i>Cymbidium tracyanum</i>       | Gongshan  | 1700 | 13.88 | 1738.42 | 78.47 | 860.43  | 0.50 | Epiphyte    | Dense forest  | Non-endemic |
| <i>Cymbidium tracyanum</i>       | Pingbian  | 1800 | 14.02 | 1648.57 | 86.34 | 990.16  | 0.60 | Epiphyte    | Dense forest  | Non-endemic |
| <i>Cymbidium tracyanum</i>       | Jingdong  | 2100 | 12.98 | 1128.40 | 76.80 | 1142.11 | 1.01 | Epiphyte    | Dense forest  | Non-endemic |
| <i>Cymbidium wilsonii</i>        | Jingdong  | 2500 | 10.58 | 1128.40 | 76.80 | 1142.11 | 1.01 | Epiphyte    | Shrubland     | Endemic     |
| <i>Cypripedium bardolphianum</i> | Weixi     | 3600 | 3.83  | 970.70  | 69.95 | 1021.03 | 1.05 | Terrestrial | Grassy slope  | Non-endemic |
| <i>Cypripedium bardolphianum</i> | Zhongdian | 3700 | 3.24  | 641.73  | 69.05 | 914.89  | 1.43 | Terrestrial | Sparse forest | Non-endemic |
| <i>Cypripedium bardolphianum</i> | Zhongdian | 3900 | 2.04  | 641.73  | 69.05 | 914.89  | 1.43 | Terrestrial | Grassy slope  | Non-endemic |
| <i>Cypripedium corrugatum</i>    | Lijiang   | 2500 | 12.07 | 982.53  | 63.24 | 1077.65 | 1.10 | Terrestrial | Grassy slope  | Non-endemic |
| <i>Cypripedium corrugatum</i>    | Lijiang   | 2600 | 11.47 | 982.53  | 63.24 | 1077.65 | 1.10 | Terrestrial | Forest edge   | Non-endemic |
| <i>Cypripedium corrugatum</i>    | Lijiang   | 2700 | 10.87 | 982.53  | 63.24 | 1077.65 | 1.10 | Terrestrial | Grassy slope  | Non-endemic |
| <i>Cypripedium corrugatum</i>    | Zhongdian | 2900 | 8.04  | 641.73  | 69.05 | 914.89  | 1.43 | Terrestrial | Shrubland     | Non-endemic |
| <i>Cypripedium corrugatum</i>    | Lijiang   | 3000 | 9.07  | 982.53  | 63.24 | 1077.65 | 1.10 | Terrestrial | Grassy slope  | Non-endemic |
| <i>Cypripedium corrugatum</i>    | Lijiang   | 3260 | 7.51  | 982.53  | 63.24 | 1077.65 | 1.10 | Terrestrial | Forest edge   | Non-endemic |
| <i>Cypripedium corrugatum</i>    | Lijiang   | 3400 | 6.67  | 982.53  | 63.24 | 1077.65 | 1.10 | Terrestrial | Meadow        | Non-endemic |
| <i>Cypripedium corrugatum</i>    | Zhongdian | 3500 | 4.44  | 641.73  | 69.05 | 914.89  | 1.43 | Terrestrial | Grassy slope  | Non-endemic |
| <i>Cypripedium corrugatum</i>    | Gongshan  | 3650 | 2.18  | 1738.42 | 78.47 | 860.43  | 0.50 | Terrestrial | Meadow        | Non-endemic |
| <i>Cypripedium corrugatum</i>    | Zhongdian | 3900 | 2.04  | 641.73  | 69.05 | 914.89  | 1.43 | Terrestrial | Grassy slope  | Non-endemic |
| <i>Cypripedium corrugatum</i>    | Zhongdian | 4000 | 1.44  | 641.73  | 69.05 | 914.89  | 1.43 | Terrestrial | Shrubland     | Non-endemic |
| <i>Cypripedium dahanise</i>      | Lijiang   | 2800 | 10.27 | 982.53  | 63.24 | 1077.65 | 1.10 | Terrestrial | Open site     | Non-endemic |
| <i>Cypripedium dahanise</i>      | Lijiang   | 3000 | 9.07  | 982.53  | 63.24 | 1077.65 | 1.10 | Terrestrial | Open site     | Non-endemic |
| <i>Cypripedium dahanise</i>      | Zhongdian | 3500 | 4.44  | 641.73  | 69.05 | 914.89  | 1.43 | Terrestrial | Sparse forest | Non-endemic |
| <i>Cypripedium elegans</i>       | Lijiang   | 3600 | 5.47  | 982.53  | 63.24 | 1077.65 | 1.10 | Terrestrial | Meadow        | Non-endemic |
| <i>Cypripedium farreri</i>       | Lijiang   | 3100 | 8.47  | 982.53  | 63.24 | 1077.65 | 1.10 | Terrestrial | Grassy slope  | Non-endemic |
| <i>Cypripedium flavum</i>        | Lijiang   | 2600 | 11.47 | 982.53  | 63.24 | 1077.65 | 1.10 | Terrestrial | Open site     | Non-endemic |
| <i>Cypripedium flavum</i>        | Weixi     | 2600 | 9.83  | 970.70  | 69.95 | 1021.03 | 1.05 | Terrestrial | Sparse forest | Non-endemic |
| <i>Cypripedium flavum</i>        | Lijiang   | 2850 | 9.97  | 982.53  | 63.24 | 1077.65 | 1.10 | Terrestrial | Meadow        | Non-endemic |
| <i>Cypripedium flavum</i>        | Dali      | 2850 | 9.72  | 1082.70 | 68.61 | 1256.27 | 1.16 | Terrestrial | Shrubland     | Non-endemic |
| <i>Cypripedium flavum</i>        | Lijiang   | 2900 | 9.67  | 982.53  | 63.24 | 1077.65 | 1.10 | Terrestrial | Grassy slope  | Non-endemic |
| <i>Cypripedium flavum</i>        | Gongshan  | 2950 | 6.38  | 1738.42 | 78.47 | 860.43  | 0.50 | Terrestrial | Forest edge   | Non-endemic |
| <i>Cypripedium flavum</i>        | Gongshan  | 3000 | 6.08  | 1738.42 | 78.47 | 860.43  | 0.50 | Terrestrial | Grassy slope  | Non-endemic |
| <i>Cypripedium flavum</i>        | Deqin     | 3000 | 7.17  | 639.48  | 70.85 | 896.66  | 1.40 | Terrestrial | Grassy slope  | Non-endemic |
| <i>Cypripedium flavum</i>        | Lijiang   | 3000 | 9.07  | 982.53  | 63.24 | 1077.65 | 1.10 | Terrestrial | Grassy slope  | Non-endemic |

|                               |           |      |       |         |       |         |      |             |               |             |
|-------------------------------|-----------|------|-------|---------|-------|---------|------|-------------|---------------|-------------|
| <i>Cypripedium flavum</i>     | Zhongdian | 3000 | 7.44  | 641.73  | 69.05 | 914.89  | 1.43 | Terrestrial | Shrubland     | Non-endemic |
| <i>Cypripedium flavum</i>     | Lijiang   | 3100 | 8.47  | 982.53  | 63.24 | 1077.65 | 1.10 | Terrestrial | Grassy slope  | Non-endemic |
| <i>Cypripedium flavum</i>     | Zhongdian | 3100 | 6.84  | 641.73  | 69.05 | 914.89  | 1.43 | Terrestrial | Shrubland     | Non-endemic |
| <i>Cypripedium flavum</i>     | Lijiang   | 3200 | 7.87  | 982.53  | 63.24 | 1077.65 | 1.10 | Terrestrial | Grassy slope  | Non-endemic |
| <i>Cypripedium flavum</i>     | Lijiang   | 3200 | 7.87  | 982.53  | 63.24 | 1077.65 | 1.10 | Terrestrial | Meadow        | Non-endemic |
| <i>Cypripedium flavum</i>     | Lijiang   | 3260 | 7.51  | 982.53  | 63.24 | 1077.65 | 1.10 | Terrestrial | Forest edge   | Non-endemic |
| <i>Cypripedium flavum</i>     | Zhongdian | 3300 | 5.64  | 641.73  | 69.05 | 914.89  | 1.43 | Terrestrial | Dense forest  | Non-endemic |
| <i>Cypripedium flavum</i>     | Deqin     | 3300 | 5.37  | 639.48  | 70.85 | 896.66  | 1.40 | Terrestrial | Dense forest  | Non-endemic |
| <i>Cypripedium flavum</i>     | Lijiang   | 3300 | 7.27  | 982.53  | 63.24 | 1077.65 | 1.10 | Terrestrial | Forest edge   | Non-endemic |
| <i>Cypripedium flavum</i>     | Zhongdian | 3350 | 5.34  | 641.73  | 69.05 | 914.89  | 1.43 | Terrestrial | Grassy slope  | Non-endemic |
| <i>Cypripedium flavum</i>     | Zhongdian | 3400 | 5.04  | 641.73  | 69.05 | 914.89  | 1.43 | Terrestrial | Grassy slope  | Non-endemic |
| <i>Cypripedium flavum</i>     | Zhongdian | 3400 | 5.04  | 641.73  | 69.05 | 914.89  | 1.43 | Terrestrial | Shrubland     | Non-endemic |
| <i>Cypripedium flavum</i>     | Zhongdian | 3400 | 5.04  | 641.73  | 69.05 | 914.89  | 1.43 | Terrestrial | Shrubland     | Non-endemic |
| <i>Cypripedium flavum</i>     | Zhongdian | 3420 | 4.92  | 641.73  | 69.05 | 914.89  | 1.43 | Terrestrial | Sparse forest | Non-endemic |
| <i>Cypripedium flavum</i>     | Zhongdian | 3450 | 4.74  | 641.73  | 69.05 | 914.89  | 1.43 | Terrestrial | Dense forest  | Non-endemic |
| <i>Cypripedium flavum</i>     | Zhongdian | 3500 | 4.44  | 641.73  | 69.05 | 914.89  | 1.43 | Terrestrial | Shrubland     | Non-endemic |
| <i>Cypripedium forrestii</i>  | Zhongdian | 3512 | 4.37  | 641.73  | 69.05 | 914.89  | 1.43 | Terrestrial | Shrubland     | Endemic     |
| <i>Cypripedium forrestii</i>  | Zhongdian | 3650 | 3.54  | 641.73  | 69.05 | 914.89  | 1.43 | Terrestrial | Dense forest  | Endemic     |
| <i>Cypripedium franchetii</i> | Zhongdian | 3620 | 3.72  | 641.73  | 69.05 | 914.89  | 1.43 | Terrestrial | Shrubland     | Non-endemic |
| <i>Cypripedium guttatum</i>   | Lijiang   | 2800 | 10.27 | 982.53  | 63.24 | 1077.65 | 1.10 | Terrestrial | Grassy slope  | Non-endemic |
| <i>Cypripedium guttatum</i>   | Lijiang   | 2900 | 9.67  | 982.53  | 63.24 | 1077.65 | 1.10 | Terrestrial | Shrubland     | Non-endemic |
| <i>Cypripedium guttatum</i>   | Zhongdian | 3000 | 7.44  | 641.73  | 69.05 | 914.89  | 1.43 | Terrestrial | Dense forest  | Non-endemic |
| <i>Cypripedium guttatum</i>   | Deqin     | 3200 | 5.97  | 639.48  | 70.85 | 896.66  | 1.40 | Terrestrial | Dense forest  | Non-endemic |
| <i>Cypripedium guttatum</i>   | Zhongdian | 3210 | 6.18  | 641.73  | 69.05 | 914.89  | 1.43 | Terrestrial | Dense forest  | Non-endemic |
| <i>Cypripedium guttatum</i>   | Deqin     | 3250 | 5.67  | 639.48  | 70.85 | 896.66  | 1.40 | Terrestrial | Dense forest  | Non-endemic |
| <i>Cypripedium guttatum</i>   | Zhongdian | 3300 | 5.64  | 641.73  | 69.05 | 914.89  | 1.43 | Terrestrial | Dense forest  | Non-endemic |
| <i>Cypripedium guttatum</i>   | Zhongdian | 3500 | 4.44  | 641.73  | 69.05 | 914.89  | 1.43 | Terrestrial | Dense forest  | Non-endemic |
| <i>Cypripedium guttatum</i>   | Lijiang   | 3500 | 6.07  | 982.53  | 63.24 | 1077.65 | 1.10 | Terrestrial | Meadow        | Non-endemic |
| <i>Cypripedium guttatum</i>   | Zhongdian | 3600 | 3.84  | 641.73  | 69.05 | 914.89  | 1.43 | Terrestrial | Grassy slope  | Non-endemic |
| <i>Cypripedium guttatum</i>   | Zhongdian | 3700 | 3.24  | 641.73  | 69.05 | 914.89  | 1.43 | Terrestrial | Forest edge   | Non-endemic |
| <i>Cypripedium guttatum</i>   | Zhongdian | 3700 | 3.24  | 641.73  | 69.05 | 914.89  | 1.43 | Terrestrial | Grassy slope  | Non-endemic |
| <i>Cypripedium henryi</i>     | Gongshan  | 1900 | 12.68 | 1738.42 | 78.47 | 860.43  | 0.50 | Terrestrial | Shrubland     | Non-endemic |
| <i>Cypripedium henryi</i>     | Gongshan  | 2000 | 12.08 | 1738.42 | 78.47 | 860.43  | 0.50 | Terrestrial | Sparse forest | Non-endemic |
| <i>Cypripedium henryi</i>     | Weixi     | 2100 | 12.83 | 970.70  | 69.95 | 1021.03 | 1.05 | Terrestrial | Dense forest  | Non-endemic |
| <i>Cypripedium henryi</i>     | Weixi     | 2300 | 11.63 | 970.70  | 69.95 | 1021.03 | 1.05 | Terrestrial | Sparse forest | Non-endemic |
| <i>Cypripedium henryi</i>     | Gongshan  | 2450 | 9.38  | 1738.42 | 78.47 | 860.43  | 0.50 | Terrestrial | Dense forest  | Non-endemic |

|                                  |           |      |       |         |       |         |      |             |               |             |
|----------------------------------|-----------|------|-------|---------|-------|---------|------|-------------|---------------|-------------|
| <i>Cypripedium henryi</i>        | Weixi     | 2500 | 10.43 | 970.70  | 69.95 | 1021.03 | 1.05 | Terrestrial | Dense forest  | Non-endemic |
| <i>Cypripedium henryi</i>        | Gongshan  | 2800 | 7.28  | 1738.42 | 78.47 | 860.43  | 0.50 | Terrestrial | Forest edge   | Non-endemic |
| <i>Cypripedium lichiangense</i>  | Lijiang   | 2600 | 11.47 | 982.53  | 63.24 | 1077.65 | 1.10 | Terrestrial | Shrubland     | Endemic     |
| <i>Cypripedium margaritaceum</i> | Lijiang   | 2600 | 11.47 | 982.53  | 63.24 | 1077.65 | 1.10 | Terrestrial | Shrubland     | Non-endemic |
| <i>Cypripedium margaritaceum</i> | Qiaojia   | 2700 | 7.42  | 878.15  | 76.01 | 1034.97 | 1.18 | Terrestrial | Dense forest  | Non-endemic |
| <i>Cypripedium margaritaceum</i> | Dali      | 2700 | 10.62 | 1082.70 | 68.61 | 1256.27 | 1.16 | Terrestrial | Shrubland     | Non-endemic |
| <i>Cypripedium margaritaceum</i> | Zhongdian | 2800 | 8.64  | 641.73  | 69.05 | 914.89  | 1.43 | Terrestrial | Shrubland     | Non-endemic |
| <i>Cypripedium margaritaceum</i> | Lijiang   | 2800 | 10.27 | 982.53  | 63.24 | 1077.65 | 1.10 | Terrestrial | Shrubland     | Non-endemic |
| <i>Cypripedium margaritaceum</i> | Lijiang   | 2850 | 9.97  | 982.53  | 63.24 | 1077.65 | 1.10 | Terrestrial | Dense forest  | Non-endemic |
| <i>Cypripedium margaritaceum</i> | Lijiang   | 2900 | 9.67  | 982.53  | 63.24 | 1077.65 | 1.10 | Terrestrial | Dense forest  | Non-endemic |
| <i>Cypripedium margaritaceum</i> | Lijiang   | 3000 | 9.07  | 982.53  | 63.24 | 1077.65 | 1.10 | Terrestrial | Dense forest  | Non-endemic |
| <i>Cypripedium margaritaceum</i> | Qiaojia   | 3000 | 5.62  | 878.15  | 76.01 | 1034.97 | 1.18 | Terrestrial | Dense forest  | Non-endemic |
| <i>Cypripedium margaritaceum</i> | Dali      | 3000 | 8.82  | 1082.70 | 68.61 | 1256.27 | 1.16 | Terrestrial | Meadow        | Non-endemic |
| <i>Cypripedium margaritaceum</i> | Lijiang   | 3000 | 9.07  | 982.53  | 63.24 | 1077.65 | 1.10 | Terrestrial | Shrubland     | Non-endemic |
| <i>Cypripedium margaritaceum</i> | Lijiang   | 3100 | 8.47  | 982.53  | 63.24 | 1077.65 | 1.10 | Terrestrial | Dense forest  | Non-endemic |
| <i>Cypripedium margaritaceum</i> | Dali      | 3100 | 8.22  | 1082.70 | 68.61 | 1256.27 | 1.16 | Terrestrial | Shrubland     | Non-endemic |
| <i>Cypripedium margaritaceum</i> | Lijiang   | 3150 | 8.17  | 982.53  | 63.24 | 1077.65 | 1.10 | Terrestrial | Forest edge   | Non-endemic |
| <i>Cypripedium margaritaceum</i> | Dali      | 3400 | 6.42  | 1082.70 | 68.61 | 1256.27 | 1.16 | Terrestrial | Dense forest  | Non-endemic |
| <i>Cypripedium margaritaceum</i> | Zhongdian | 3450 | 4.74  | 641.73  | 69.05 | 914.89  | 1.43 | Terrestrial | Sparse forest | Non-endemic |
| <i>Cypripedium margaritaceum</i> | Lijiang   | 3500 | 6.07  | 982.53  | 63.24 | 1077.65 | 1.10 | Terrestrial | Shrubland     | Non-endemic |
| <i>Cypripedium plectrochilum</i> | Luquan    | 2100 | 13.12 | 965.09  | 73.60 | 1160.89 | 1.20 | Terrestrial | Sparse forest | Non-endemic |
| <i>Cypripedium plectrochilum</i> | Fuming    | 2200 | 12.77 | 871.62  | 71.93 | 1209.56 | 1.39 | Terrestrial | Grassy slope  | Non-endemic |
| <i>Cypripedium plectrochilum</i> | Songming  | 2400 | 11.19 | 1010.18 | 74.14 | 1134.24 | 1.12 | Terrestrial | Dense forest  | Non-endemic |
| <i>Cypripedium plectrochilum</i> | Eryuan    | 2500 | 11.53 | 745.16  | 68.27 | 1210.94 | 1.63 | Terrestrial | Grassy slope  | Non-endemic |
| <i>Cypripedium plectrochilum</i> | Lijiang   | 2650 | 11.17 | 982.53  | 63.24 | 1077.65 | 1.10 | Terrestrial | Dense forest  | Non-endemic |
| <i>Cypripedium plectrochilum</i> | Zhongdian | 2700 | 9.24  | 641.73  | 69.05 | 914.89  | 1.43 | Terrestrial | Meadow        | Non-endemic |
| <i>Cypripedium plectrochilum</i> | Lijiang   | 2800 | 10.27 | 982.53  | 63.24 | 1077.65 | 1.10 | Terrestrial | Dense forest  | Non-endemic |
| <i>Cypripedium plectrochilum</i> | Zhongdian | 2800 | 8.64  | 641.73  | 69.05 | 914.89  | 1.43 | Terrestrial | Grassy slope  | Non-endemic |
| <i>Cypripedium plectrochilum</i> | Dayao     | 2850 | 9.83  | 810.80  | 65.01 | 1427.38 | 1.76 | Terrestrial | Dense forest  | Non-endemic |
| <i>Cypripedium plectrochilum</i> | Zhongdian | 2900 | 8.04  | 641.73  | 69.05 | 914.89  | 1.43 | Terrestrial | Dense forest  | Non-endemic |
| <i>Cypripedium plectrochilum</i> | Lijiang   | 2920 | 9.55  | 982.53  | 63.24 | 1077.65 | 1.10 | Terrestrial | Dense forest  | Non-endemic |
| <i>Cypripedium plectrochilum</i> | Zhongdian | 3000 | 7.44  | 641.73  | 69.05 | 914.89  | 1.43 | Terrestrial | Forest edge   | Non-endemic |
| <i>Cypripedium plectrochilum</i> | Ninglang  | 3100 | 7.46  | 928.64  | 69.17 | 1136.01 | 1.22 | Terrestrial | Dense forest  | Non-endemic |
| <i>Cypripedium plectrochilum</i> | Zhongdian | 3100 | 6.84  | 641.73  | 69.05 | 914.89  | 1.43 | Terrestrial | Dense forest  | Non-endemic |
| <i>Cypripedium plectrochilum</i> | Zhongdian | 3100 | 6.84  | 641.73  | 69.05 | 914.89  | 1.43 | Terrestrial | Shrubland     | Non-endemic |
| <i>Cypripedium plectrochilum</i> | Lijiang   | 3170 | 8.05  | 982.53  | 63.24 | 1077.65 | 1.10 | Terrestrial | Dense forest  | Non-endemic |

|                                  |           |      |       |         |       |         |      |             |              |             |
|----------------------------------|-----------|------|-------|---------|-------|---------|------|-------------|--------------|-------------|
| <i>Cypripedium plectrochilum</i> | Zhongdian | 3210 | 6.18  | 641.73  | 69.05 | 914.89  | 1.43 | Terrestrial | Dense forest | Non-endemic |
| <i>Cypripedium plectrochilum</i> | Lijiang   | 3250 | 7.57  | 982.53  | 63.24 | 1077.65 | 1.10 | Terrestrial | Dense forest | Non-endemic |
| <i>Cypripedium plectrochilum</i> | Zhongdian | 3250 | 5.94  | 641.73  | 69.05 | 914.89  | 1.43 | Terrestrial | Open site    | Non-endemic |
| <i>Cypripedium plectrochilum</i> | Lijiang   | 3250 | 7.57  | 982.53  | 63.24 | 1077.65 | 1.10 | Terrestrial | Open site    | Non-endemic |
| <i>Cypripedium plectrochilum</i> | Zhongdian | 3400 | 5.04  | 641.73  | 69.05 | 914.89  | 1.43 | Terrestrial | Dense forest | Non-endemic |
| <i>Cypripedium plectrochilum</i> | Zhongdian | 3500 | 4.44  | 641.73  | 69.05 | 914.89  | 1.43 | Terrestrial | Dense forest | Non-endemic |
| <i>Cypripedium plectrochilum</i> | Zhongdian | 3600 | 3.84  | 641.73  | 69.05 | 914.89  | 1.43 | Terrestrial | Dense forest | Non-endemic |
| <i>Cypripedium tibeticum</i>     | Lijiang   | 2600 | 11.47 | 982.53  | 63.24 | 1077.65 | 1.10 | Terrestrial | Forest edge  | Non-endemic |
| <i>Cypripedium tibeticum</i>     | Lijiang   | 2650 | 11.17 | 982.53  | 63.24 | 1077.65 | 1.10 | Terrestrial | Shrubland    | Non-endemic |
| <i>Cypripedium tibeticum</i>     | Lijiang   | 2800 | 10.27 | 982.53  | 63.24 | 1077.65 | 1.10 | Terrestrial | Shrubland    | Non-endemic |
| <i>Cypripedium tibeticum</i>     | Weixi     | 2840 | 8.39  | 970.70  | 69.95 | 1021.03 | 1.05 | Terrestrial | Grassy slope | Non-endemic |
| <i>Cypripedium tibeticum</i>     | Lijiang   | 2850 | 9.97  | 982.53  | 63.24 | 1077.65 | 1.10 | Terrestrial | Meadow       | Non-endemic |
| <i>Cypripedium tibeticum</i>     | Lijiang   | 2900 | 9.67  | 982.53  | 63.24 | 1077.65 | 1.10 | Terrestrial | Meadow       | Non-endemic |
| <i>Cypripedium tibeticum</i>     | Zhongdian | 3000 | 7.44  | 641.73  | 69.05 | 914.89  | 1.43 | Terrestrial | Dense forest | Non-endemic |
| <i>Cypripedium tibeticum</i>     | Lijiang   | 3100 | 8.47  | 982.53  | 63.24 | 1077.65 | 1.10 | Terrestrial | Grassy slope | Non-endemic |
| <i>Cypripedium tibeticum</i>     | Lijiang   | 3100 | 8.47  | 982.53  | 63.24 | 1077.65 | 1.10 | Terrestrial | Grassy slope | Non-endemic |
| <i>Cypripedium tibeticum</i>     | Lijiang   | 3140 | 8.23  | 982.53  | 63.24 | 1077.65 | 1.10 | Terrestrial | Meadow       | Non-endemic |
| <i>Cypripedium tibeticum</i>     | Weixi     | 3200 | 6.23  | 970.70  | 69.95 | 1021.03 | 1.05 | Terrestrial | Dense forest | Non-endemic |
| <i>Cypripedium tibeticum</i>     | Weixi     | 3200 | 6.23  | 970.70  | 69.95 | 1021.03 | 1.05 | Terrestrial | Grassy slope | Non-endemic |
| <i>Cypripedium tibeticum</i>     | Lijiang   | 3200 | 7.87  | 982.53  | 63.24 | 1077.65 | 1.10 | Terrestrial | Meadow       | Non-endemic |
| <i>Cypripedium tibeticum</i>     | Lijiang   | 3200 | 7.87  | 982.53  | 63.24 | 1077.65 | 1.10 | Terrestrial | Meadow       | Non-endemic |
| <i>Cypripedium tibeticum</i>     | Yongde    | 3240 | 7.69  | 1266.25 | 69.00 | 1283.63 | 1.01 | Terrestrial | Grassy slope | Non-endemic |
| <i>Cypripedium tibeticum</i>     | Zhongdian | 3250 | 5.94  | 641.73  | 69.05 | 914.89  | 1.43 | Terrestrial | Dense forest | Non-endemic |
| <i>Cypripedium tibeticum</i>     | Lijiang   | 3250 | 7.57  | 982.53  | 63.24 | 1077.65 | 1.10 | Terrestrial | Grassy slope | Non-endemic |
| <i>Cypripedium tibeticum</i>     | Lijiang   | 3250 | 7.57  | 982.53  | 63.24 | 1077.65 | 1.10 | Terrestrial | Grassy slope | Non-endemic |
| <i>Cypripedium tibeticum</i>     | Zhongdian | 3300 | 5.64  | 641.73  | 69.05 | 914.89  | 1.43 | Terrestrial | Dense forest | Non-endemic |
| <i>Cypripedium tibeticum</i>     | Zhongdian | 3400 | 5.04  | 641.73  | 69.05 | 914.89  | 1.43 | Terrestrial | Dense forest | Non-endemic |
| <i>Cypripedium tibeticum</i>     | Zhongdian | 3400 | 5.04  | 641.73  | 69.05 | 914.89  | 1.43 | Terrestrial | Dense forest | Non-endemic |
| <i>Cypripedium tibeticum</i>     | Yangbi    | 3400 | 5.59  | 1044.23 | 72.19 | 1161.15 | 1.11 | Terrestrial | Forest edge  | Non-endemic |
| <i>Cypripedium tibeticum</i>     | Zhongdian | 3400 | 5.04  | 641.73  | 69.05 | 914.89  | 1.43 | Terrestrial | Grassy slope | Non-endemic |
| <i>Cypripedium tibeticum</i>     | Zhongdian | 3450 | 4.74  | 641.73  | 69.05 | 914.89  | 1.43 | Terrestrial | Dense forest | Non-endemic |
| <i>Cypripedium tibeticum</i>     | Zhongdian | 3450 | 4.74  | 641.73  | 69.05 | 914.89  | 1.43 | Terrestrial | Dense forest | Non-endemic |
| <i>Cypripedium tibeticum</i>     | Zhongdian | 3500 | 4.44  | 641.73  | 69.05 | 914.89  | 1.43 | Terrestrial | Shrubland    | Non-endemic |
| <i>Cypripedium tibeticum</i>     | Gongshan  | 3600 | 2.48  | 1738.42 | 78.47 | 860.43  | 0.50 | Terrestrial | Forest edge  | Non-endemic |
| <i>Cypripedium tibeticum</i>     | Gongshan  | 3650 | 2.18  | 1738.42 | 78.47 | 860.43  | 0.50 | Terrestrial | Dense forest | Non-endemic |
| <i>Cypripedium tibeticum</i>     | Zhongdian | 3700 | 3.24  | 641.73  | 69.05 | 914.89  | 1.43 | Terrestrial | Open site    | Non-endemic |



|                                                        |           |      |       |         |       |         |      |             |               |             |
|--------------------------------------------------------|-----------|------|-------|---------|-------|---------|------|-------------|---------------|-------------|
| <i>Cypripedium tibeticum</i>                           | Zhongdian | 3750 | 2.94  | 641.73  | 69.05 | 914.89  | 1.43 | Terrestrial | Dense forest  | Non-endemic |
| <i>Cypripedium wardii</i>                              | Deqin     | 3250 | 5.67  | 639.48  | 70.85 | 896.66  | 1.40 | Terrestrial | Dense forest  | Non-endemic |
| <i>Cypripedium yunnanense</i>                          | Zhongdian | 3350 | 5.34  | 641.73  | 69.05 | 914.89  | 1.43 | Terrestrial | Meadow        | Endemic     |
| <i>Dendrobium acinaciforme</i>                         | Mengla    | 850  | 20.10 | 1514.70 | 84.25 | 1146.68 | 0.76 | Epiphyte    | Dense forest  | Non-endemic |
| <i>Dendrobium acinaciforme</i>                         | Jinghong  | 950  | 20.02 | 1161.08 | 80.46 | 1256.19 | 1.08 | Epiphyte    | Sparse forest | Non-endemic |
| <i>Dendrobium acinaciforme</i>                         | Jinghong  | 1270 | 18.10 | 1161.08 | 80.46 | 1256.19 | 1.08 | Epiphyte    | Dense forest  | Non-endemic |
| <i>Dendrobium acinaciforme</i>                         | Fugong    | 1320 | 16.14 | 1441.43 | 79.99 | 906.18  | 0.63 | Epiphyte    | Dense forest  | Non-endemic |
| <i>Dendrobium aduncum</i>                              | Jinping   | 380  | 23.21 | 2305.17 | 83.81 | 1030.46 | 0.45 | Epiphyte    | Dense forest  | Non-endemic |
| <i>Dendrobium aduncum</i>                              | Xichou    | 830  | 19.95 | 1267.54 | 82.98 | 985.97  | 0.78 | Epiphyte    | Dense forest  | Non-endemic |
| <i>Dendrobium aduncum</i>                              | Xichou    | 870  | 19.71 | 1267.54 | 82.98 | 985.97  | 0.78 | Epiphyte    | Dense forest  | Non-endemic |
| <i>Dendrobium aduncum</i>                              | Xichou    | 1460 | 16.17 | 1267.54 | 82.98 | 985.97  | 0.78 | Epiphyte    | Dense forest  | Non-endemic |
| <i>Dendrobium aduncum</i>                              | Yangbi    | 2200 | 12.79 | 1044.23 | 72.19 | 1161.15 | 1.11 | Epiphyte    | Dense forest  | Non-endemic |
| <i>Dendrobium aphyllum</i>                             | Funing    | 200  | 22.42 | 1161.58 | 79.07 | 1147.17 | 0.99 | Epiphyte    | Shrubland     | Non-endemic |
| <i>Dendrobium aphyllum</i>                             | Lushui    | 900  | 20.65 | 1195.57 | 70.63 | 911.65  | 0.76 | Epiphyte    | Dense forest  | Non-endemic |
| <i>Dendrobium aphyllum</i>                             | Jinghong  | 950  | 20.02 | 1161.08 | 80.46 | 1256.19 | 1.08 | Epiphyte    | Sparse forest | Non-endemic |
| <i>Dendrobium aphyllum</i>                             | Zhenkang  | 1000 | 18.84 | 1602.96 | 81.14 | 1089.09 | 0.68 | Epiphyte    | Dense forest  | Non-endemic |
| <i>Dendrobium aphyllum</i>                             | Zhenkang  | 1000 | 18.84 | 1602.96 | 81.14 | 1089.09 | 0.68 | Epiphyte    | Dense forest  | Non-endemic |
| <i>Dendrobium aphyllum</i>                             | Yongde    | 1000 | 21.13 | 1266.25 | 69.00 | 1283.63 | 1.01 | Epiphyte    | Dense forest  | Non-endemic |
| <i>Dendrobium aphyllum</i>                             | Zhenkang  | 1100 | 18.24 | 1602.96 | 81.14 | 1089.09 | 0.68 | Epiphyte    | Dense forest  | Non-endemic |
| <i>Dendrobium aphyllum</i>                             | Puer      | 1200 | 19.06 | 1429.78 | 79.51 | 1123.79 | 0.79 | Epiphyte    | Dense forest  | Non-endemic |
| <i>Dendrobium aphyllum</i>                             | Menghai   | 1350 | 17.46 | 1314.38 | 80.83 | 1150.91 | 0.88 | Epiphyte    | Sparse forest | Non-endemic |
| <i>Dendrobium aphyllum</i>                             | Zhenkang  | 1500 | 15.84 | 1602.96 | 81.14 | 1089.09 | 0.68 | Epiphyte    | Dense forest  | Non-endemic |
| <i>Dendrobium aphyllum</i>                             | Zhenkang  | 1600 | 15.24 | 1602.96 | 81.14 | 1089.09 | 0.68 | Epiphyte    | Dense forest  | Non-endemic |
| <i>Dendrobium aphyllum</i>                             | Zhenkang  | 1700 | 14.64 | 1602.96 | 81.14 | 1089.09 | 0.68 | Epiphyte    | Dense forest  | Non-endemic |
| <i>Dendrobium aphyllum</i>                             | Longling  | 1800 | 13.32 | 2098.66 | 84.65 | 973.45  | 0.46 | Epiphyte    | Dense forest  | Non-endemic |
| <i>Dendrobium aurantiacum</i><br><i>var.auranticum</i> | Gongshan  | 1500 | 15.08 | 1738.42 | 78.47 | 860.43  | 0.50 | Epiphyte    | Dense forest  | Non-endemic |
| <i>Dendrobium aurantiacum</i><br><i>var.denneanum</i>  | Xichou    | 1320 | 17.01 | 1267.54 | 82.98 | 985.97  | 0.78 | Epiphyte    | Dense forest  | Non-endemic |
| <i>Dendrobium aurantiacum</i><br><i>var.denneanum</i>  | Xichou    | 1460 | 16.17 | 1267.54 | 82.98 | 985.97  | 0.78 | Epiphyte    | Dense forest  | Non-endemic |
| <i>Dendrobium aurantiacum</i><br><i>var.denneanum</i>  | Menghai   | 1540 | 16.32 | 1314.38 | 80.83 | 1150.91 | 0.88 | Epiphyte    | Shrubland     | Non-endemic |
| <i>Dendrobium aurantiacum</i><br><i>var.denneanum</i>  | Xichou    | 1600 | 15.33 | 1267.54 | 82.98 | 985.97  | 0.78 | Epiphyte    | Dense forest  | Non-endemic |

|                                                       |           |      |       |         |       |         |      |          |               |             |
|-------------------------------------------------------|-----------|------|-------|---------|-------|---------|------|----------|---------------|-------------|
| <i>Dendrobium aurantiacum</i><br><i>var.denneanum</i> | Gongshan  | 1600 | 14.48 | 1738.42 | 78.47 | 860.43  | 0.50 | Epiphyte | Forest edge   | Non-endemic |
| <i>Dendrobium aurantiacum</i><br><i>var.denneanum</i> | Xichou    | 1600 | 15.33 | 1267.54 | 82.98 | 985.97  | 0.78 | Epiphyte | Sparse forest | Non-endemic |
| <i>Dendrobium aurantiacum</i><br><i>var.denneanum</i> | Weixi     | 1800 | 14.63 | 970.70  | 69.95 | 1021.03 | 1.05 | Epiphyte | Dense forest  | Non-endemic |
| <i>Dendrobium aurantiacum</i><br><i>var.denneanum</i> | Fengqing  | 1900 | 14.80 | 1352.80 | 73.24 | 1172.52 | 0.87 | Epiphyte | Dense forest  | Non-endemic |
| <i>Dendrobium aurantiacum</i><br><i>var.denneanum</i> | Weixi     | 2000 | 13.43 | 970.70  | 69.95 | 1021.03 | 1.05 | Epiphyte | Dense forest  | Non-endemic |
| <i>Dendrobium aurantiacum</i><br><i>var.denneanum</i> | Weixi     | 2015 | 13.34 | 970.70  | 69.95 | 1021.03 | 1.05 | Epiphyte | Dense forest  | Non-endemic |
| <i>Dendrobium aurantiacum</i><br><i>var.denneanum</i> | Gongshan  | 2100 | 11.48 | 1738.42 | 78.47 | 860.43  | 0.50 | Epiphyte | Dense forest  | Non-endemic |
| <i>Dendrobium aurantiacum</i><br><i>var.denneanum</i> | Dali      | 2200 | 13.62 | 1082.70 | 68.61 | 1256.27 | 1.16 | Epiphyte | Shrubland     | Non-endemic |
| <i>Dendrobium aurantiacum</i><br><i>var.denneanum</i> | Lijiang   | 2400 | 12.67 | 982.53  | 63.24 | 1077.65 | 1.10 | Epiphyte | Dense forest  | Non-endemic |
| <i>Dendrobium aurantiacum</i><br><i>var.denneanum</i> | Lijiang   | 2500 | 12.07 | 982.53  | 63.24 | 1077.65 | 1.10 | Epiphyte | Dense forest  | Non-endemic |
| <i>Dendrobium aurantiacum</i><br><i>var.denneanum</i> | Zhongdian | 3250 | 5.94  | 641.73  | 69.05 | 914.89  | 1.43 | Epiphyte | Dense forest  | Non-endemic |
| <i>Dendrobium bellatulum</i>                          | Pingbian  | 1250 | 17.32 | 1648.57 | 86.34 | 990.16  | 0.60 | Epiphyte | Dense forest  | Non-endemic |
| <i>Dendrobium bellatulum</i>                          | Zhenkang  | 1600 | 15.24 | 1602.96 | 81.14 | 1089.09 | 0.68 | Epiphyte | Dense forest  | Non-endemic |
| <i>Dendrobium bellatulum</i>                          | Yongde    | 1600 | 17.53 | 1266.25 | 69.00 | 1283.63 | 1.01 | Epiphyte | Dense forest  | Non-endemic |
| <i>Dendrobium bellatulum</i>                          | Lancang   | 1800 | 14.90 | 1596.50 | 77.88 | 1183.80 | 0.74 | Epiphyte | Dense forest  | Non-endemic |
| <i>Dendrobium bellatulum</i>                          | Jingdong  | 1950 | 13.88 | 1128.40 | 76.80 | 1142.11 | 1.01 | Epiphyte | Dense forest  | Non-endemic |
| <i>Dendrobium bellatulum</i>                          | Jingdong  | 2050 | 13.28 | 1128.40 | 76.80 | 1142.11 | 1.01 | Epiphyte | Dense forest  | Non-endemic |
| <i>Dendrobium bellatulum</i>                          | Fengqing  | 2100 | 13.60 | 1352.80 | 73.24 | 1172.52 | 0.87 | Epiphyte | Dense forest  | Non-endemic |
| <i>Dendrobium bellatulum</i>                          | Jingdong  | 2100 | 12.98 | 1128.40 | 76.80 | 1142.11 | 1.01 | Epiphyte | Dense forest  | Non-endemic |
| <i>Dendrobium bellatulum</i>                          | Jingdong  | 2100 | 12.98 | 1128.40 | 76.80 | 1142.11 | 1.01 | Epiphyte | Dense forest  | Non-endemic |
| <i>Dendrobium brymerianum</i>                         | Yongde    | 1600 | 17.53 | 1266.25 | 69.00 | 1283.63 | 1.01 | Epiphyte | Dense forest  | Non-endemic |
| <i>Dendrobium brymerianum</i>                         | Menghai   | 1900 | 14.16 | 1314.38 | 80.83 | 1150.91 | 0.88 | Epiphyte | Dense forest  | Non-endemic |
| <i>Dendrobium capillipes</i>                          | Jinghong  | 900  | 20.32 | 1161.08 | 80.46 | 1256.19 | 1.08 | Epiphyte | Dense forest  | Non-endemic |
| <i>Dendrobium cariniferum</i>                         | Zhenkang  | 1100 | 18.24 | 1602.96 | 81.14 | 1089.09 | 0.68 | Epiphyte | Dense forest  | Non-endemic |
| <i>Dendrobium cariniferum</i>                         | Cangyuan  | 1200 | 18.02 | 1733.34 | 81.63 | 1060.82 | 0.61 | Epiphyte | Dense forest  | Non-endemic |

|                                  |          |      |       |         |       |         |      |          |               |             |
|----------------------------------|----------|------|-------|---------|-------|---------|------|----------|---------------|-------------|
| <i>Dendrobium cariniferum</i>    | Zhenkang | 1640 | 15.00 | 1602.96 | 81.14 | 1089.09 | 0.68 | Epiphyte | Dense forest  | Non-endemic |
| <i>Dendrobium chrysanthum</i>    | Mengla   | 700  | 21.00 | 1514.70 | 84.25 | 1146.68 | 0.76 | Epiphyte | Dense forest  | Non-endemic |
| <i>Dendrobium chrysanthum</i>    | Malipo   | 1000 | 18.26 | 1063.54 | 85.83 | 1053.97 | 0.99 | Epiphyte | Sparse forest | Non-endemic |
| <i>Dendrobium chrysanthum</i>    | Yanshan  | 1100 | 18.86 | 1003.57 | 79.42 | 1172.21 | 1.17 | Epiphyte | Dense forest  | Non-endemic |
| <i>Dendrobium chrysanthum</i>    | Fugong   | 1200 | 16.86 | 1441.43 | 79.99 | 906.18  | 0.63 | Epiphyte | Forest edge   | Non-endemic |
| <i>Dendrobium chrysanthum</i>    | Pingbian | 1250 | 17.32 | 1648.57 | 86.34 | 990.16  | 0.60 | Epiphyte | Dense forest  | Non-endemic |
| <i>Dendrobium chrysanthum</i>    | Lincang  | 1300 | 18.72 | 1165.84 | 72.08 | 1167.73 | 1.00 | Epiphyte | Dense forest  | Non-endemic |
| <i>Dendrobium chrysanthum</i>    | Jingdong | 1450 | 16.88 | 1128.40 | 76.80 | 1142.11 | 1.01 | Epiphyte | Dense forest  | Non-endemic |
| <i>Dendrobium chrysanthum</i>    | Xichou   | 1500 | 15.93 | 1267.54 | 82.98 | 985.97  | 0.78 | Epiphyte | Dense forest  | Non-endemic |
| <i>Dendrobium chrysanthum</i>    | Luchun   | 1580 | 17.22 | 2013.54 | 78.64 | 1151.56 | 0.57 | Epiphyte | Dense forest  | Non-endemic |
| <i>Dendrobium chrysanthum</i>    | Fugong   | 1700 | 13.86 | 1441.43 | 79.99 | 906.18  | 0.63 | Epiphyte | Sparse forest | Non-endemic |
| <i>Dendrobium chrysanthum</i>    | Lancang  | 1900 | 14.30 | 1596.50 | 77.88 | 1183.80 | 0.74 | Epiphyte | Dense forest  | Non-endemic |
| <i>Dendrobium chrysanthum</i>    | Fugong   | 2000 | 12.06 | 1441.43 | 79.99 | 906.18  | 0.63 | Epiphyte | Dense forest  | Non-endemic |
| <i>Dendrobium chrysanthum</i>    | Fugong   | 2500 | 9.06  | 1441.43 | 79.99 | 906.18  | 0.63 | Epiphyte | Dense forest  | Non-endemic |
| <i>Dendrobium chrysanthum</i>    | Fugong   | 2500 | 9.06  | 1441.43 | 79.99 | 906.18  | 0.63 | Epiphyte | Dense forest  | Non-endemic |
| <i>Dendrobium chrysotoxum</i>    | Jinghong | 700  | 21.52 | 1161.08 | 80.46 | 1256.19 | 1.08 | Epiphyte | Sparse forest | Non-endemic |
| <i>Dendrobium chrysotoxum</i>    | Jinghong | 1400 | 17.32 | 1161.08 | 80.46 | 1256.19 | 1.08 | Epiphyte | Dense forest  | Non-endemic |
| <i>Dendrobium chrysotoxum</i>    | Cangyuan | 1500 | 16.22 | 1733.34 | 81.63 | 1060.82 | 0.61 | Epiphyte | Dense forest  | Non-endemic |
| <i>Dendrobium chrysotoxum</i>    | Lancang  | 1550 | 16.40 | 1596.50 | 77.88 | 1183.80 | 0.74 | Epiphyte | Dense forest  | Non-endemic |
| <i>Dendrobium compactum</i>      | Jinghong | 800  | 20.92 | 1161.08 | 80.46 | 1256.19 | 1.08 | Epiphyte | Shrubland     | Non-endemic |
| <i>Dendrobium compactum</i>      | Menghai  | 1100 | 18.96 | 1314.38 | 80.83 | 1150.91 | 0.88 | Epiphyte | Dense forest  | Non-endemic |
| <i>Dendrobium compactum</i>      | Mengla   | 1150 | 18.30 | 1514.70 | 84.25 | 1146.68 | 0.76 | Epiphyte | Dense forest  | Non-endemic |
| <i>Dendrobium compactum</i>      | Menghai  | 1530 | 16.38 | 1314.38 | 80.83 | 1150.91 | 0.88 | Epiphyte | Dense forest  | Non-endemic |
| <i>Dendrobium compactum</i>      | Jinghong | 1600 | 16.12 | 1161.08 | 80.46 | 1256.19 | 1.08 | Epiphyte | Shrubland     | Non-endemic |
| <i>Dendrobium compactum</i>      | Jinghong | 1850 | 14.62 | 1161.08 | 80.46 | 1256.19 | 1.08 | Epiphyte | Dense forest  | Non-endemic |
| <i>Dendrobium compactum</i>      | Fengqing | 2000 | 14.20 | 1352.80 | 73.24 | 1172.52 | 0.87 | Epiphyte | Dense forest  | Non-endemic |
| <i>Dendrobium compressicaule</i> | Mengla   | 720  | 20.88 | 1514.70 | 84.25 | 1146.68 | 0.76 | Epiphyte | Dense forest  | Non-endemic |
| <i>Dendrobium crepidatum</i>     | Zhenkang | 1200 | 17.64 | 1602.96 | 81.14 | 1089.09 | 0.68 | Epiphyte | Dense forest  | Non-endemic |
| <i>Dendrobium crystallinum</i>   | Mengla   | 810  | 20.34 | 1514.70 | 84.25 | 1146.68 | 0.76 | Epiphyte | Dense forest  | Non-endemic |
| <i>Dendrobium devonianum</i>     | Jinghong | 750  | 21.22 | 1161.08 | 80.46 | 1256.19 | 1.08 | Epiphyte | Sparse forest | Non-endemic |
| <i>Dendrobium devonianum</i>     | Jinghong | 950  | 20.02 | 1161.08 | 80.46 | 1256.19 | 1.08 | Epiphyte | Sparse forest | Non-endemic |
| <i>Dendrobium devonianum</i>     | Pingbian | 1000 | 18.82 | 1648.57 | 86.34 | 990.16  | 0.60 | Epiphyte | Sparse forest | Non-endemic |
| <i>Dendrobium devonianum</i>     | Ruili    | 1200 | 17.80 | 1436.05 | 78.54 | 1237.71 | 0.86 | Epiphyte | Dense forest  | Non-endemic |
| <i>Dendrobium devonianum</i>     | Jinghong | 1200 | 18.52 | 1161.08 | 80.46 | 1256.19 | 1.08 | Epiphyte | Dense forest  | Non-endemic |
| <i>Dendrobium devonianum</i>     | Hekou    | 1270 | 16.13 | 1768.58 | 84.25 | 1166.26 | 0.66 | Epiphyte | Sparse forest | Non-endemic |
| <i>Dendrobium devonianum</i>     | Pingbian | 1300 | 17.02 | 1648.57 | 86.34 | 990.16  | 0.60 | Epiphyte | Dense forest  | Non-endemic |

|                                  |          |      |       |         |       |         |      |          |               |             |
|----------------------------------|----------|------|-------|---------|-------|---------|------|----------|---------------|-------------|
| <i>Dendrobium devonianum</i>     | Lancang  | 1400 | 17.30 | 1596.50 | 77.88 | 1183.80 | 0.74 | Epiphyte | Dense forest  | Non-endemic |
| <i>Dendrobium devonianum</i>     | Menghai  | 1530 | 16.38 | 1314.38 | 80.83 | 1150.91 | 0.88 | Epiphyte | Shrubland     | Non-endemic |
| <i>Dendrobium devonianum</i>     | Jingdong | 1670 | 15.56 | 1128.40 | 76.80 | 1142.11 | 1.01 | Epiphyte | Dense forest  | Non-endemic |
| <i>Dendrobium devonianum</i>     | Menghai  | 1800 | 14.76 | 1314.38 | 80.83 | 1150.91 | 0.88 | Epiphyte | Dense forest  | Non-endemic |
| <i>Dendrobium devonianum</i>     | Fengqing | 2000 | 14.20 | 1352.80 | 73.24 | 1172.52 | 0.87 | Epiphyte | Dense forest  | Non-endemic |
| <i>Dendrobium dixanthum</i>      | Jinghong | 1200 | 18.52 | 1161.08 | 80.46 | 1256.19 | 1.08 | Epiphyte | Dense forest  | Non-endemic |
| <i>Dendrobium ellipsophyllum</i> | Menghai  | 1100 | 18.96 | 1314.38 | 80.83 | 1150.91 | 0.88 | Epiphyte | Dense forest  | Non-endemic |
| <i>Dendrobium exile</i>          | Mengla   | 500  | 22.20 | 1514.70 | 84.25 | 1146.68 | 0.76 | Epiphyte | Dense forest  | Non-endemic |
| <i>Dendrobium exile</i>          | Mengla   | 650  | 21.30 | 1514.70 | 84.25 | 1146.68 | 0.76 | Epiphyte | Dense forest  | Non-endemic |
| <i>Dendrobium exile</i>          | Mengla   | 710  | 20.94 | 1514.70 | 84.25 | 1146.68 | 0.76 | Epiphyte | Dense forest  | Non-endemic |
| <i>Dendrobium falconeri</i>      | Jingdong | 1540 | 16.34 | 1128.40 | 76.80 | 1142.11 | 1.01 | Epiphyte | Dense forest  | Non-endemic |
| <i>Dendrobium falconeri</i>      | Zhenkang | 1600 | 15.24 | 1602.96 | 81.14 | 1089.09 | 0.68 | Epiphyte | Dense forest  | Non-endemic |
| <i>Dendrobium falconeri</i>      | Jingdong | 1600 | 15.98 | 1128.40 | 76.80 | 1142.11 | 1.01 | Epiphyte | Forest edge   | Non-endemic |
| <i>Dendrobium falconeri</i>      | Luchun   | 1620 | 16.98 | 2013.54 | 78.64 | 1151.56 | 0.57 | Epiphyte | Dense forest  | Non-endemic |
| <i>Dendrobium fimbriatum</i>     | Jinghong | 650  | 21.82 | 1161.08 | 80.46 | 1256.19 | 1.08 | Epiphyte | Sparse forest | Non-endemic |
| <i>Dendrobium fimbriatum</i>     | Xichou   | 870  | 19.71 | 1267.54 | 82.98 | 985.97  | 0.78 | Epiphyte | Dense forest  | Non-endemic |
| <i>Dendrobium fimbriatum</i>     | Hekou    | 900  | 18.35 | 1768.58 | 84.25 | 1166.26 | 0.66 | Epiphyte | Forest edge   | Non-endemic |
| <i>Dendrobium fimbriatum</i>     | Funing   | 1000 | 17.62 | 1161.58 | 79.07 | 1147.17 | 0.99 | Epiphyte | Sparse forest | Non-endemic |
| <i>Dendrobium fimbriatum</i>     | Fugong   | 1050 | 17.76 | 1441.43 | 79.99 | 906.18  | 0.63 | Epiphyte | Forest edge   | Non-endemic |
| <i>Dendrobium fimbriatum</i>     | Jinghong | 1150 | 18.82 | 1161.08 | 80.46 | 1256.19 | 1.08 | Epiphyte | Dense forest  | Non-endemic |
| <i>Dendrobium fimbriatum</i>     | Yanshan  | 1200 | 18.26 | 1003.57 | 79.42 | 1172.21 | 1.17 | Epiphyte | Dense forest  | Non-endemic |
| <i>Dendrobium fimbriatum</i>     | Zhenkang | 1400 | 16.44 | 1602.96 | 81.14 | 1089.09 | 0.68 | Epiphyte | Dense forest  | Non-endemic |
| <i>Dendrobium fimbriatum</i>     | Xichou   | 1500 | 15.93 | 1267.54 | 82.98 | 985.97  | 0.78 | Epiphyte | Open site     | Non-endemic |
| <i>Dendrobium fimbriatum</i>     | Gongshan | 1550 | 14.78 | 1738.42 | 78.47 | 860.43  | 0.50 | Epiphyte | Dense forest  | Non-endemic |
| <i>Dendrobium fimbriatum</i>     | Zhenkang | 1600 | 15.24 | 1602.96 | 81.14 | 1089.09 | 0.68 | Epiphyte | Dense forest  | Non-endemic |
| <i>Dendrobium fimbriatum</i>     | Xichou   | 1600 | 15.33 | 1267.54 | 82.98 | 985.97  | 0.78 | Epiphyte | Dense forest  | Non-endemic |
| <i>Dendrobium fimbriatum</i>     | Zhenkang | 1640 | 15.00 | 1602.96 | 81.14 | 1089.09 | 0.68 | Epiphyte | Dense forest  | Non-endemic |
| <i>Dendrobium fimbriatum</i>     | Fugong   | 3100 | 5.46  | 1441.43 | 79.99 | 906.18  | 0.63 | Epiphyte | Dense forest  | Non-endemic |
| <i>Dendrobium findlayanum</i>    | Mengla   | 1000 | 19.20 | 1514.70 | 84.25 | 1146.68 | 0.76 | Epiphyte | Dense forest  | Non-endemic |
| <i>Dendrobium guangxiense</i>    | Xichou   | 1530 | 15.75 | 1267.54 | 82.98 | 985.97  | 0.78 | Epiphyte | Sparse forest | Non-endemic |
| <i>Dendrobium hancockii</i>      | Funing   | 700  | 19.42 | 1161.58 | 79.07 | 1147.17 | 0.99 | Epiphyte | Dense forest  | Non-endemic |
| <i>Dendrobium harveyanum</i>     | Yongde   | 1600 | 17.53 | 1266.25 | 69.00 | 1283.63 | 1.01 | Epiphyte | Dense forest  | Non-endemic |
| <i>Dendrobium henryi</i>         | Malipo   | 550  | 20.96 | 1063.54 | 85.83 | 1053.97 | 0.99 | Epiphyte | Shrubland     | Non-endemic |
| <i>Dendrobium henryi</i>         | Menglian | 910  | 20.12 | 1357.68 | 80.47 | 1185.94 | 0.87 | Epiphyte | Sparse forest | Non-endemic |
| <i>Dendrobium henryi</i>         | Pingbian | 1100 | 18.22 | 1648.57 | 86.34 | 990.16  | 0.60 | Epiphyte | Dense forest  | Non-endemic |
| <i>Dendrobium henryi</i>         | Pingbian | 1250 | 17.32 | 1648.57 | 86.34 | 990.16  | 0.60 | Epiphyte | Sparse forest | Non-endemic |

|                                |          |      |       |         |       |         |      |          |               |             |
|--------------------------------|----------|------|-------|---------|-------|---------|------|----------|---------------|-------------|
| <i>Dendrobium henryi</i>       | Pingbian | 1360 | 16.66 | 1648.57 | 86.34 | 990.16  | 0.60 | Epiphyte | Dense forest  | Non-endemic |
| <i>Dendrobium henryi</i>       | Hekou    | 1460 | 14.99 | 1768.58 | 84.25 | 1166.26 | 0.66 | Epiphyte | Dense forest  | Non-endemic |
| <i>Dendrobium henryi</i>       | Xichou   | 1500 | 15.93 | 1267.54 | 82.98 | 985.97  | 0.78 | epiphyte | Forest edge   | Non-endemic |
| <i>Dendrobium henryi</i>       | Menglian | 1700 | 15.38 | 1357.68 | 80.47 | 1185.94 | 0.87 | Epiphyte | Dense forest  | Non-endemic |
| <i>Dendrobium hercoglossum</i> | Maguan   | 800  | 20.21 | 1330.52 | 83.25 | 1086.43 | 0.82 | Epiphyte | Dense forest  | Non-endemic |
| <i>Dendrobium hercoglossum</i> | Pingbian | 1200 | 17.62 | 1648.57 | 86.34 | 990.16  | 0.60 | Epiphyte | Dense forest  | Non-endemic |
| <i>Dendrobium hercoglossum</i> | Jinping  | 1260 | 17.93 | 2305.17 | 83.81 | 1030.46 | 0.45 | Epiphyte | Sparse forest | Non-endemic |
| <i>Dendrobium heterocarpum</i> | Zhenkang | 1600 | 15.24 | 1602.96 | 81.14 | 1089.09 | 0.68 | Epiphyte | Sparse forest | Non-endemic |
| <i>Dendrobium heterocarpum</i> | Zhenkang | 1600 | 15.24 | 1602.96 | 81.14 | 1089.09 | 0.68 | Epiphyte | Dense forest  | Non-endemic |
| <i>Dendrobium heterocarpum</i> | Luxi     | 1750 | 14.58 | 1650.33 | 79.33 | 1183.39 | 0.72 | Epiphyte | Dense forest  | Non-endemic |
| <i>Dendrobium hookerianum</i>  | Fugong   | 1100 | 17.46 | 1441.43 | 79.99 | 906.18  | 0.63 | Epiphyte | Dense forest  | Non-endemic |
| <i>Dendrobium hookerianum</i>  | Gongshan | 1300 | 16.28 | 1738.42 | 78.47 | 860.43  | 0.50 | Epiphyte | Dense forest  | Non-endemic |
| <i>Dendrobium hookerianum</i>  | Gongshan | 1400 | 15.68 | 1738.42 | 78.47 | 860.43  | 0.50 | Epiphyte | Dense forest  | Non-endemic |
| <i>Dendrobium hookerianum</i>  | Gongshan | 1570 | 14.66 | 1738.42 | 78.47 | 860.43  | 0.50 | Epiphyte | Forest edge   | Non-endemic |
| <i>Dendrobium hookerianum</i>  | Gongshan | 1600 | 14.48 | 1738.42 | 78.47 | 860.43  | 0.50 | Epiphyte | Forest edge   | Non-endemic |
| <i>Dendrobium hookerianum</i>  | Gongshan | 1600 | 14.48 | 1738.42 | 78.47 | 860.43  | 0.50 | Epiphyte | Forest edge   | Non-endemic |
| <i>Dendrobium hookerianum</i>  | Gongshan | 1700 | 13.88 | 1738.42 | 78.47 | 860.43  | 0.50 | Epiphyte | Dense forest  | Non-endemic |
| <i>Dendrobium hookerianum</i>  | Gongshan | 1800 | 13.28 | 1738.42 | 78.47 | 860.43  | 0.50 | Epiphyte | Dense forest  | Non-endemic |
| <i>Dendrobium hookerianum</i>  | Gongshan | 1800 | 13.28 | 1738.42 | 78.47 | 860.43  | 0.50 | Epiphyte | Dense forest  | Non-endemic |
| <i>Dendrobium hookerianum</i>  | Lushui   | 1900 | 14.65 | 1195.57 | 70.63 | 911.65  | 0.76 | Epiphyte | Dense forest  | Non-endemic |
| <i>Dendrobium hookerianum</i>  | Fugong   | 3300 | 4.26  | 1441.43 | 79.99 | 906.18  | 0.63 | Epiphyte | Dense forest  | Non-endemic |
| <i>Dendrobium infundibulum</i> | Mengla   | 2070 | 12.78 | 1514.70 | 84.25 | 1146.68 | 0.76 | Epiphyte | Dense forest  | Non-endemic |
| <i>Dendrobium jenkinsii</i>    | Jinghong | 1150 | 18.82 | 1161.08 | 80.46 | 1256.19 | 1.08 | Epiphyte | Dense forest  | Non-endemic |
| <i>Dendrobium jenkinsii</i>    | Menghai  | 1180 | 18.48 | 1314.38 | 80.83 | 1150.91 | 0.88 | Epiphyte | Dense forest  | Non-endemic |
| <i>Dendrobium jenkinsii</i>    | Jinghong | 1400 | 17.32 | 1161.08 | 80.46 | 1256.19 | 1.08 | Epiphyte | Shrubland     | Non-endemic |
| <i>Dendrobium jenkinsii</i>    | Jinghong | 1400 | 17.32 | 1161.08 | 80.46 | 1256.19 | 1.08 | Epiphyte | Sparse forest | Non-endemic |
| <i>Dendrobium jenkinsii</i>    | Menghai  | 1500 | 16.56 | 1314.38 | 80.83 | 1150.91 | 0.88 | Epiphyte | Dense forest  | Non-endemic |
| <i>Dendrobium jenkinsii</i>    | Lancang  | 1500 | 16.70 | 1596.50 | 77.88 | 1183.80 | 0.74 | Epiphyte | Dense forest  | Non-endemic |
| <i>Dendrobium jenkinsii</i>    | Menghai  | 1530 | 16.38 | 1314.38 | 80.83 | 1150.91 | 0.88 | Epiphyte | Dense forest  | Non-endemic |
| <i>Dendrobium jenkinsii</i>    | Cangyuan | 1550 | 15.92 | 1733.34 | 81.63 | 1060.82 | 0.61 | Epiphyte | Dense forest  | Non-endemic |
| <i>Dendrobium lindleyi</i>     | Hekou    | 270  | 22.13 | 1768.58 | 84.25 | 1166.26 | 0.66 | Epiphyte | Dense forest  | Non-endemic |
| <i>Dendrobium lindleyi</i>     | Xichou   | 500  | 21.93 | 1267.54 | 82.98 | 985.97  | 0.78 | Epiphyte | Dense forest  | Non-endemic |
| <i>Dendrobium lindleyi</i>     | Menghai  | 1400 | 17.16 | 1314.38 | 80.83 | 1150.91 | 0.88 | Epiphyte | Dense forest  | Non-endemic |
| <i>Dendrobium lituiflorum</i>  | Jinghong | 540  | 22.48 | 1161.08 | 80.46 | 1256.19 | 1.08 | Epiphyte | Dense forest  | Non-endemic |
| <i>Dendrobium lituiflorum</i>  | Lushui   | 900  | 20.65 | 1195.57 | 70.63 | 911.65  | 0.76 | Epiphyte | Dense forest  | Non-endemic |
| <i>Dendrobium lituiflorum</i>  | Jinghong | 1100 | 19.12 | 1161.08 | 80.46 | 1256.19 | 1.08 | Epiphyte | Dense forest  | Non-endemic |

|                                |           |      |       |         |       |         |      |          |               |             |
|--------------------------------|-----------|------|-------|---------|-------|---------|------|----------|---------------|-------------|
| <i>Dendrobium lituiflorum</i>  | Zhenkang  | 1600 | 15.24 | 1602.96 | 81.14 | 1089.09 | 0.68 | Epiphyte | Dense forest  | Non-endemic |
| <i>Dendrobium lituiflorum</i>  | Lancang   | 1700 | 15.50 | 1596.50 | 77.88 | 1183.80 | 0.74 | Epiphyte | Dense forest  | Non-endemic |
| <i>Dendrobium loddigesii</i>   | Funing    | 700  | 19.42 | 1161.58 | 79.07 | 1147.17 | 0.99 | Epiphyte | Dense forest  | Non-endemic |
| <i>Dendrobium loddigesii</i>   | Guangnan  | 1340 | 16.21 | 1044.26 | 78.94 | 1090.35 | 1.04 | Epiphyte | Dense forest  | Non-endemic |
| <i>Dendrobium loddigesii</i>   | Wenshan   | 1500 | 16.66 | 988.87  | 76.70 | 1272.98 | 1.29 | Epiphyte | Dense forest  | Non-endemic |
| <i>Dendrobium lohohense</i>    | Xichou    | 1100 | 18.33 | 1267.54 | 82.98 | 985.97  | 0.78 | Epiphyte | Sparse forest | Non-endemic |
| <i>Dendrobium lohohense</i>    | Xichou    | 1350 | 16.83 | 1267.54 | 82.98 | 985.97  | 0.78 | Epiphyte | Sparse forest | Non-endemic |
| <i>Dendrobium lohohense</i>    | Yongde    | 2700 | 10.93 | 1266.25 | 69.00 | 1283.63 | 1.01 | Epiphyte | Dense forest  | Non-endemic |
| <i>Dendrobium longicornu</i>   | Gongshan  | 1200 | 16.88 | 1738.42 | 78.47 | 860.43  | 0.50 | Epiphyte | Dense forest  | Non-endemic |
| <i>Dendrobium longicornu</i>   | Pingbian  | 1400 | 16.42 | 1648.57 | 86.34 | 990.16  | 0.60 | Epiphyte | Grassy slope  | Non-endemic |
| <i>Dendrobium longicornu</i>   | Xichou    | 1550 | 15.63 | 1267.54 | 82.98 | 985.97  | 0.78 | Epiphyte | Dense forest  | Non-endemic |
| <i>Dendrobium longicornu</i>   | Luchun    | 1900 | 15.30 | 2013.54 | 78.64 | 1151.56 | 0.57 | Epiphyte | Dense forest  | Non-endemic |
| <i>Dendrobium longicornu</i>   | Tengchong | 2100 | 12.40 | 1501.45 | 78.06 | 857.93  | 0.57 | Epiphyte | Forest edge   | Non-endemic |
| <i>Dendrobium longicornu</i>   | Yongde    | 2340 | 13.09 | 1266.25 | 69.00 | 1283.63 | 1.01 | Epiphyte | Dense forest  | Non-endemic |
| <i>Dendrobium longicornu</i>   | Longling  | 2400 | 9.72  | 2098.66 | 84.65 | 973.45  | 0.46 | Epiphyte | Dense forest  | Non-endemic |
| <i>Dendrobium longicornu</i>   | Yongde    | 2400 | 12.73 | 1266.25 | 69.00 | 1283.63 | 1.01 | Epiphyte | Dense forest  | Non-endemic |
| <i>Dendrobium longicornu</i>   | Luchun    | 2500 | 11.70 | 2013.54 | 78.64 | 1151.56 | 0.57 | Epiphyte | Dense forest  | Non-endemic |
| <i>Dendrobium longicornu</i>   | Yongde    | 2560 | 11.77 | 1266.25 | 69.00 | 1283.63 | 1.01 | Epiphyte | Dense forest  | Non-endemic |
| <i>Dendrobium longicornu</i>   | Yongde    | 2600 | 11.53 | 1266.25 | 69.00 | 1283.63 | 1.01 | Epiphyte | Dense forest  | Non-endemic |
| <i>Dendrobium longicornu</i>   | Yunlong   | 2800 | 9.25  | 1195.57 | 70.63 | 911.65  | 0.76 | Epiphyte | Dense forest  | Non-endemic |
| <i>Dendrobium minutiflorum</i> | Hekou     | 1840 | 12.71 | 1768.58 | 84.25 | 1166.26 | 0.66 | Epiphyte | Dense forest  | Non-endemic |
| <i>Dendrobium moniliforme</i>  | Xichou    | 1620 | 15.21 | 1267.54 | 82.98 | 985.97  | 0.78 | Epiphyte | Dense forest  | Non-endemic |
| <i>Dendrobium moniliforme</i>  | Gengma    | 1700 | 15.47 | 1327.70 | 77.28 | 1181.78 | 0.89 | Epiphyte | Dense forest  | Non-endemic |
| <i>Dendrobium moniliforme</i>  | Pingbian  | 1800 | 14.02 | 1648.57 | 86.34 | 990.16  | 0.60 | Epiphyte | Dense forest  | Non-endemic |
| <i>Dendrobium moniliforme</i>  | Wenshan   | 1900 | 14.26 | 988.87  | 76.70 | 1272.98 | 1.29 | Epiphyte | Dense forest  | Non-endemic |
| <i>Dendrobium moniliforme</i>  | Pingbian  | 2000 | 12.82 | 1648.57 | 86.34 | 990.16  | 0.60 | Epiphyte | Dense forest  | Non-endemic |
| <i>Dendrobium moniliforme</i>  | Jingdong  | 2000 | 13.58 | 1128.40 | 76.80 | 1142.11 | 1.01 | Epiphyte | Dense forest  | Non-endemic |
| <i>Dendrobium moniliforme</i>  | Yangbi    | 2510 | 10.93 | 1044.23 | 72.19 | 1161.15 | 1.11 | Epiphyte | Dense forest  | Non-endemic |
| <i>Dendrobium moniliforme</i>  | Gongshan  | 3000 | 6.08  | 1738.42 | 78.47 | 860.43  | 0.50 | Epiphyte | Dense forest  | Non-endemic |
| <i>Dendrobium moschatum</i>    | Jinghong  | 1300 | 17.92 | 1161.08 | 80.46 | 1256.19 | 1.08 | Epiphyte | Dense forest  | Non-endemic |
| <i>Dendrobium nobile</i>       | Xichou    | 850  | 19.83 | 1267.54 | 82.98 | 985.97  | 0.78 | Epiphyte | Open site     | Non-endemic |
| <i>Dendrobium nobile</i>       | Jinghong  | 1000 | 19.72 | 1161.08 | 80.46 | 1256.19 | 1.08 | Epiphyte | Dense forest  | Non-endemic |
| <i>Dendrobium nobile</i>       | Fugong    | 1050 | 17.76 | 1441.43 | 79.99 | 906.18  | 0.63 | Epiphyte | Forest edge   | Non-endemic |
| <i>Dendrobium nobile</i>       | Fugong    | 1100 | 17.46 | 1441.43 | 79.99 | 906.18  | 0.63 | Epiphyte | Sparse forest | Non-endemic |
| <i>Dendrobium nobile</i>       | Menghai   | 1300 | 17.76 | 1314.38 | 80.83 | 1150.91 | 0.88 | Epiphyte | Sparse forest | Non-endemic |
| <i>Dendrobium nobile</i>       | Xichou    | 1350 | 16.83 | 1267.54 | 82.98 | 985.97  | 0.78 | Epiphyte | Sparse forest | Non-endemic |

|                                  |             |      |       |         |       |         |      |          |               |             |
|----------------------------------|-------------|------|-------|---------|-------|---------|------|----------|---------------|-------------|
| <i>Dendrobium nobile</i>         | Cangyuan    | 1500 | 16.22 | 1733.34 | 81.63 | 1060.82 | 0.61 | Epiphyte | Dense forest  | Non-endemic |
| <i>Dendrobium nobile</i>         | Wenshan     | 1500 | 16.66 | 988.87  | 76.70 | 1272.98 | 1.29 | Epiphyte | Sparse forest | Non-endemic |
| <i>Dendrobium nobile</i>         | Gongshan    | 1600 | 14.48 | 1738.42 | 78.47 | 860.43  | 0.50 | Epiphyte | Sparse forest | Non-endemic |
| <i>Dendrobium nobile</i>         | Lijiang     | 1700 | 16.87 | 982.53  | 63.24 | 1077.65 | 1.10 | Epiphyte | Forest edge   | Non-endemic |
| <i>Dendrobium officinale</i>     | Gongshan    | 2200 | 10.88 | 1738.42 | 78.47 | 860.43  | 0.50 | Epiphyte | Forest edge   | Non-endemic |
| <i>Dendrobium officinale</i>     | Gongshan    | 2350 | 9.98  | 1738.42 | 78.47 | 860.43  | 0.50 | Epiphyte | Dense forest  | Non-endemic |
| <i>Dendrobium parviflorum</i>    | Jinghong    | 1500 | 16.72 | 1161.08 | 80.46 | 1256.19 | 1.08 | Epiphyte | Dense forest  | Non-endemic |
| <i>Dendrobium pendulum</i>       | Mengla      | 1200 | 18.00 | 1514.70 | 84.25 | 1146.68 | 0.76 | Epiphyte | Dense forest  | Non-endemic |
| <i>Dendrobium porphyrochilum</i> | Tengchong   | 2700 | 8.80  | 1501.45 | 78.06 | 857.93  | 0.57 | Epiphyte | Dense forest  | Non-endemic |
| <i>Dendrobium primulinum</i>     | Longling    | 1800 | 13.32 | 2098.66 | 84.65 | 973.45  | 0.46 | Epiphyte | Dense forest  | Non-endemic |
| <i>Dendrobium salaccense</i>     | Mengla      | 680  | 21.12 | 1514.70 | 84.25 | 1146.68 | 0.76 | Epiphyte | Dense forest  | Non-endemic |
| <i>Dendrobium sinense</i>        | Mengla      | 520  | 22.08 | 1514.70 | 84.25 | 1146.68 | 0.76 | Epiphyte | Dense forest  | Non-endemic |
| <i>Dendrobium spatella</i>       | Mengla      | 830  | 20.22 | 1514.70 | 84.25 | 1146.68 | 0.76 | Epiphyte | Dense forest  | Non-endemic |
| <i>Dendrobium strongylanthum</i> | Longchuan   | 1000 | 18.55 | 1604.50 | 80.46 | 1149.57 | 0.72 | Epiphyte | Shrubland     | Non-endemic |
| <i>Dendrobium strongylanthum</i> | Hekou       | 1300 | 15.95 | 1768.58 | 84.25 | 1166.26 | 0.66 | Epiphyte | Dense forest  | Non-endemic |
| <i>Dendrobium strongylanthum</i> | Jinghong    | 1800 | 14.92 | 1161.08 | 80.46 | 1256.19 | 1.08 | Epiphyte | Dense forest  | Non-endemic |
| <i>Dendrobium strongylanthum</i> | Luchun      | 1900 | 15.30 | 2013.54 | 78.64 | 1151.56 | 0.57 | Epiphyte | Dense forest  | Non-endemic |
| <i>Dendrobium strongylanthum</i> | Shuangjiang | 2000 | 13.98 | 1006.64 | 75.26 | 1272.13 | 1.26 | Epiphyte | Dense forest  | Non-endemic |
| <i>Dendrobium strongylanthum</i> | Jingdong    | 2100 | 12.98 | 1128.40 | 76.80 | 1142.11 | 1.01 | Epiphyte | Dense forest  | Non-endemic |
| <i>Dendrobium strongylanthum</i> | Jingdong    | 2100 | 12.98 | 1128.40 | 76.80 | 1142.11 | 1.01 | Epiphyte | Dense forest  | Non-endemic |
| <i>Dendrobium strongylanthum</i> | Jingdong    | 2100 | 12.98 | 1128.40 | 76.80 | 1142.11 | 1.01 | Epiphyte | Dense forest  | Non-endemic |
| <i>Dendrobium strongylanthum</i> | Jingdong    | 2100 | 12.98 | 1128.40 | 76.80 | 1142.11 | 1.01 | Epiphyte | Dense forest  | Non-endemic |
| <i>Dendrobium strongylanthum</i> | Luchun      | 2100 | 14.10 | 2013.54 | 78.64 | 1151.56 | 0.57 | Epiphyte | Sparse forest | Non-endemic |
| <i>Dendrobium strongylanthum</i> | Tengchong   | 2300 | 11.20 | 1501.45 | 78.06 | 857.93  | 0.57 | Epiphyte | Dense forest  | Non-endemic |
| <i>Dendrobium stuposum</i>       | Menghai     | 1760 | 15.00 | 1314.38 | 80.83 | 1150.91 | 0.88 | Epiphyte | Dense forest  | Non-endemic |
| <i>Dendrobium sulcatum</i>       | Mengla      | 950  | 19.50 | 1514.70 | 84.25 | 1146.68 | 0.76 | Epiphyte | Dense forest  | Non-endemic |
| <i>Dendrobium terminale</i>      | Mengla      | 1080 | 18.72 | 1514.70 | 84.25 | 1146.68 | 0.76 | Epiphyte | Dense forest  | Non-endemic |
| <i>Dendrobium thyrsiflorum</i>   | Cangyuan    | 800  | 20.42 | 1733.34 | 81.63 | 1060.82 | 0.61 | Epiphyte | Dense forest  | Non-endemic |
| <i>Dendrobium thyrsiflorum</i>   | Maguan      | 800  | 20.21 | 1330.52 | 83.25 | 1086.43 | 0.82 | Epiphyte | Dense forest  | Non-endemic |
| <i>Dendrobium thyrsiflorum</i>   | Malipo      | 900  | 18.86 | 1063.54 | 85.83 | 1053.97 | 0.99 | Epiphyte | Shrubland     | Non-endemic |
| <i>Dendrobium thyrsiflorum</i>   | Jinghong    | 1000 | 19.72 | 1161.08 | 80.46 | 1256.19 | 1.08 | Epiphyte | Dense forest  | Non-endemic |
| <i>Dendrobium thyrsiflorum</i>   | Jinghong    | 1100 | 19.12 | 1161.08 | 80.46 | 1256.19 | 1.08 | Epiphyte | Dense forest  | Non-endemic |
| <i>Dendrobium thyrsiflorum</i>   | Jinghong    | 1200 | 18.52 | 1161.08 | 80.46 | 1256.19 | 1.08 | Epiphyte | Dense forest  | Non-endemic |
| <i>Dendrobium thyrsiflorum</i>   | Pingbian    | 1200 | 17.62 | 1648.57 | 86.34 | 990.16  | 0.60 | Epiphyte | Dense forest  | Non-endemic |
| <i>Dendrobium thyrsiflorum</i>   | Jinghong    | 1400 | 17.32 | 1161.08 | 80.46 | 1256.19 | 1.08 | Epiphyte | Dense forest  | Non-endemic |
| <i>Dendrobium thyrsiflorum</i>   | Cangyuan    | 1500 | 16.22 | 1733.34 | 81.63 | 1060.82 | 0.61 | Epiphyte | Dense forest  | Non-endemic |

|                                |           |      |       |         |       |         |      |             |               |             |
|--------------------------------|-----------|------|-------|---------|-------|---------|------|-------------|---------------|-------------|
| <i>Dendrobium thyrsoflorum</i> | Cangyuan  | 1500 | 16.22 | 1733.34 | 81.63 | 1060.82 | 0.61 | Epiphyte    | Dense forest  | Non-endemic |
| <i>Dendrobium thyrsoflorum</i> | Menghai   | 1550 | 16.26 | 1314.38 | 80.83 | 1150.91 | 0.88 | Epiphyte    | Dense forest  | Non-endemic |
| <i>Dendrobium thyrsoflorum</i> | Gengma    | 1620 | 15.47 | 1327.70 | 77.28 | 1181.78 | 0.89 | Epiphyte    | Dense forest  | Non-endemic |
| <i>Dendrobium thyrsoflorum</i> | Menghai   | 1800 | 14.76 | 1314.38 | 80.83 | 1150.91 | 0.88 | Epiphyte    | Dense forest  | Non-endemic |
| <i>Dendrobium thyrsoflorum</i> | Jingdong  | 2000 | 13.58 | 1128.40 | 76.80 | 1142.11 | 1.01 | Epiphyte    | Dense forest  | Non-endemic |
| <i>Dendrobium thyrsoflorum</i> | Jingdong  | 2400 | 11.18 | 1128.40 | 76.80 | 1142.11 | 1.01 | Epiphyte    | Dense forest  | Non-endemic |
| <i>Dendrobium thyrsoflorum</i> | Jingdong  | 2400 | 11.18 | 1128.40 | 76.80 | 1142.11 | 1.01 | Epiphyte    | Dense forest  | Non-endemic |
| <i>Dendrobium thyrsoflorum</i> | Jinghong  | 900  | 20.32 | 1161.08 | 80.46 | 1256.19 | 1.08 | Epiphyte    | Dense forest  | Non-endemic |
| <i>Dendrobium trigonopus</i>   | Menghai   | 1150 | 18.66 | 1314.38 | 80.83 | 1150.91 | 0.88 | Epiphyte    | Dense forest  | Non-endemic |
| <i>Dendrobium wardianum</i>    | Luchun    | 1500 | 17.70 | 2013.54 | 78.64 | 1151.56 | 0.57 | Epiphyte    | Dense forest  | Non-endemic |
| <i>Dendrobium wardianum</i>    | Jingdong  | 1800 | 14.78 | 1128.40 | 76.80 | 1142.11 | 1.01 | Epiphyte    | Dense forest  | Non-endemic |
| <i>Dendrobium wardianum</i>    | Jingdong  | 1900 | 14.18 | 1128.40 | 76.80 | 1142.11 | 1.01 | Epiphyte    | Dense forest  | Non-endemic |
| <i>Dendrobium wardianum</i>    | Jingdong  | 2200 | 12.38 | 1128.40 | 76.80 | 1142.11 | 1.01 | Epiphyte    | Sparse forest | Non-endemic |
| <i>Dendrobium williamsonii</i> | Yongde    | 2400 | 12.73 | 1266.25 | 69.00 | 1283.63 | 1.01 | Epiphyte    | Shrubland     | Non-endemic |
| <i>Dendrobium wilsonii</i>     | Xichou    | 1620 | 15.21 | 1267.54 | 82.98 | 985.97  | 0.78 | Epiphyte    | Dense forest  | Non-endemic |
| <i>Diglyphosa latifolia</i>    | Pingbian  | 1200 | 17.62 | 1648.57 | 86.34 | 990.16  | 0.60 | Terrestrial | Dense forest  | Non-endemic |
| <i>Diphylax contigua</i>       | Gongshan  | 3000 | 6.08  | 1738.42 | 78.47 | 860.43  | 0.50 | Terrestrial | Shrubland     | Endemic     |
| <i>Diphylax uniformis</i>      | Yongde    | 2500 | 12.13 | 1266.25 | 69.00 | 1283.63 | 1.01 | Terrestrial | Forest edge   | Non-endemic |
| <i>Diphylax uniformis</i>      | Zhongdian | 3930 | 1.86  | 641.73  | 69.05 | 914.89  | 1.43 | Terrestrial | Dense forest  | Non-endemic |
| <i>Diphylax urceolata</i>      | Yiliang   | 1750 | 11.78 | 751.45  | 71.67 | 1097.64 | 1.46 | Terrestrial | Dense forest  | Non-endemic |
| <i>Diphylax urceolata</i>      | Gongshan  | 3100 | 5.48  | 1738.42 | 78.47 | 860.43  | 0.50 | Terrestrial | Grassy slope  | Non-endemic |
| <i>Diplomeris pulchella</i>    | Gongshan  | 1350 | 15.98 | 1738.42 | 78.47 | 860.43  | 0.50 | Terrestrial | Dense forest  | Non-endemic |
| <i>Diplomeris pulchella</i>    | Gongshan  | 1420 | 15.56 | 1738.42 | 78.47 | 860.43  | 0.50 | Terrestrial | Dense forest  | Non-endemic |
| <i>Diploprora championii</i>   | Pingbian  | 760  | 20.26 | 1648.57 | 86.34 | 990.16  | 0.60 | Epiphyte    | Sparse forest | Non-endemic |
| <i>Diploprora championii</i>   | Malipo    | 900  | 18.86 | 1063.54 | 85.83 | 1053.97 | 0.99 | Epiphyte    | Dense forest  | Non-endemic |
| <i>Diploprora championii</i>   | Pingbian  | 1000 | 18.82 | 1648.57 | 86.34 | 990.16  | 0.60 | Epiphyte    | Dense forest  | Non-endemic |
| <i>Diploprora championii</i>   | Malipo    | 1100 | 17.66 | 1063.54 | 85.83 | 1053.97 | 0.99 | Epiphyte    | Shrubland     | Non-endemic |
| <i>Diploprora championii</i>   | Maguan    | 1200 | 17.81 | 1330.52 | 83.25 | 1086.43 | 0.82 | Epiphyte    | Dense forest  | Non-endemic |
| <i>Diploprora championii</i>   | Pingbian  | 1250 | 17.32 | 1648.57 | 86.34 | 990.16  | 0.60 | Epiphyte    | Dense forest  | Non-endemic |
| <i>Diploprora championii</i>   | Pingbian  | 1320 | 16.90 | 1648.57 | 86.34 | 990.16  | 0.60 | Epiphyte    | Dense forest  | Non-endemic |
| <i>Epigeneium amplum</i>       | Malipo    | 1000 | 18.26 | 1063.54 | 85.83 | 1053.97 | 0.99 | Epiphyte    | Dense forest  | Non-endemic |
| <i>Epigeneium amplum</i>       | Xichou    | 1000 | 18.93 | 1267.54 | 82.98 | 985.97  | 0.78 | Epiphyte    | Dense forest  | Non-endemic |
| <i>Epigeneium amplum</i>       | Malipo    | 1080 | 17.78 | 1063.54 | 85.83 | 1053.97 | 0.99 | Epiphyte    | Dense forest  | Non-endemic |
| <i>Epigeneium amplum</i>       | Gongshan  | 1320 | 16.16 | 1738.42 | 78.47 | 860.43  | 0.50 | Epiphyte    | Forest edge   | Non-endemic |
| <i>Epigeneium amplum</i>       | Pingbian  | 1400 | 16.42 | 1648.57 | 86.34 | 990.16  | 0.60 | Epiphyte    | Dense forest  | Non-endemic |
| <i>Epigeneium amplum</i>       | Xichou    | 1500 | 15.93 | 1267.54 | 82.98 | 985.97  | 0.78 | Epiphyte    | Dense forest  | Non-endemic |



|                              |            |      |       |         |       |         |      |             |               |             |
|------------------------------|------------|------|-------|---------|-------|---------|------|-------------|---------------|-------------|
| <i>Epigeneium amplum</i>     | Xichou     | 1500 | 15.93 | 1267.54 | 82.98 | 985.97  | 0.78 | Epiphyte    | Dense forest  | Non-endemic |
| <i>Epigeneium clemensiae</i> | Yongde     | 2360 | 12.97 | 1266.25 | 69.00 | 1283.63 | 1.01 | Epiphyte    | Shrubland     | Non-endemic |
| <i>Epigeneium fargesii</i>   | Pingbian   | 1300 | 17.02 | 1648.57 | 86.34 | 990.16  | 0.60 | Epiphyte    | Dense forest  | Non-endemic |
| <i>Epigeneium fuscescens</i> | Jingdong   | 1350 | 17.48 | 1128.40 | 76.80 | 1142.11 | 1.01 | Epiphyte    | Dense forest  | Non-endemic |
| <i>Epigeneium fuscescens</i> | Jingdong   | 1700 | 15.38 | 1128.40 | 76.80 | 1142.11 | 1.01 | Epiphyte    | Dense forest  | Non-endemic |
| <i>Epigeneium rotundatum</i> | Dali       | 1300 | 19.02 | 1082.70 | 68.61 | 1256.27 | 1.16 | Epiphyte    | Dense forest  | Non-endemic |
| <i>Epigeneium rotundatum</i> | Binchuan   | 1580 | 17.22 | 573.87  | 62.93 | 1418.42 | 2.47 | Epiphyte    | Dense forest  | Non-endemic |
| <i>Epigeneium rotundatum</i> | Pingbian   | 1650 | 14.92 | 1648.57 | 86.34 | 990.16  | 0.60 | Epiphyte    | Dense forest  | Non-endemic |
| <i>Epigeneium rotundatum</i> | Gongshan   | 1900 | 12.68 | 1738.42 | 78.47 | 860.43  | 0.50 | Epiphyte    | Dense forest  | Non-endemic |
| <i>Epigeneium rotundatum</i> | Weixi      | 1900 | 14.03 | 970.70  | 69.95 | 1021.03 | 1.05 | Epiphyte    | Dense forest  | Non-endemic |
| <i>Epigeneium rotundatum</i> | Fugong     | 2000 | 12.06 | 1441.43 | 79.99 | 906.18  | 0.63 | Epiphyte    | Dense forest  | Non-endemic |
| <i>Epigeneium rotundatum</i> | Gongshan   | 2300 | 10.28 | 1738.42 | 78.47 | 860.43  | 0.50 | Epiphyte    | Dense forest  | Non-endemic |
| <i>Epigeneium rotundatum</i> | Jingdong   | 2300 | 11.78 | 1128.40 | 76.80 | 1142.11 | 1.01 | Epiphyte    | Shrubland     | Non-endemic |
| <i>Epigeneium rotundatum</i> | Lushui     | 2650 | 10.15 | 1195.57 | 70.63 | 911.65  | 0.76 | Epiphyte    | Dense forest  | Non-endemic |
| <i>Epigeneium yunnanense</i> | Gongshan   | 1380 | 15.80 | 1738.42 | 78.47 | 860.43  | 0.50 | Epiphyte    | Dense forest  | Endemic     |
| <i>Epigeneium yunnanense</i> | Gongshan   | 2200 | 10.88 | 1738.42 | 78.47 | 860.43  | 0.50 | Epiphyte    | Dense forest  | Endemic     |
| <i>Epigeneium yunnanense</i> | Lijiang    | 2300 | 13.27 | 982.53  | 63.24 | 1077.65 | 1.10 | Epiphyte    | Dense forest  | Endemic     |
| <i>Epigeneium yunnanense</i> | Gongshan   | 2400 | 9.68  | 1738.42 | 78.47 | 860.43  | 0.50 | Epiphyte    | Dense forest  | Endemic     |
| <i>Epigeneium yunnanense</i> | Luchun     | 2500 | 11.70 | 2013.54 | 78.64 | 1151.56 | 0.57 | Epiphyte    | Dense forest  | Endemic     |
| <i>Epipactis helleborine</i> | Gongshan   | 1000 | 18.08 | 1738.42 | 78.47 | 860.43  | 0.50 | Terrestrial | Open site     | Non-endemic |
| <i>Epipactis helleborine</i> | Jiangchuan | 1700 | 15.80 | 872.74  | 74.72 | 1181.99 | 1.35 | Terrestrial | Dense forest  | Non-endemic |
| <i>Epipactis helleborine</i> | Yiliang    | 1900 | 10.88 | 751.45  | 71.67 | 1097.64 | 1.46 | Terrestrial | Dense forest  | Non-endemic |
| <i>Epipactis helleborine</i> | Gongshan   | 2000 | 12.08 | 1738.42 | 78.47 | 860.43  | 0.50 | Terrestrial | Forest edge   | Non-endemic |
| <i>Epipactis helleborine</i> | Yuliang    | 2020 | 13.40 | 905.45  | 75.03 | 1218.48 | 1.35 | Terrestrial | Dense forest  | Non-endemic |
| <i>Epipactis helleborine</i> | Jingdong   | 2080 | 13.10 | 1128.40 | 76.80 | 1142.11 | 1.01 | Terrestrial | Dense forest  | Non-endemic |
| <i>Epipactis helleborine</i> | Hekou      | 2080 | 11.27 | 1768.58 | 84.25 | 1166.26 | 0.66 | Terrestrial | Open site     | Non-endemic |
| <i>Epipactis helleborine</i> | Jingdong   | 2100 | 12.98 | 1128.40 | 76.80 | 1142.11 | 1.01 | Terrestrial | Dense forest  | Non-endemic |
| <i>Epipactis helleborine</i> | Kunming    | 2100 | 13.68 | 1019.14 | 72.30 | 1197.62 | 1.18 | Terrestrial | Dense forest  | Non-endemic |
| <i>Epipactis helleborine</i> | Yangbi     | 2300 | 12.19 | 1044.23 | 72.19 | 1161.15 | 1.11 | Terrestrial | Dense forest  | Non-endemic |
| <i>Epipactis helleborine</i> | Songming   | 2300 | 11.79 | 1010.18 | 74.14 | 1134.24 | 1.12 | Terrestrial | Dense forest  | Non-endemic |
| <i>Epipactis helleborine</i> | Gongshan   | 2300 | 10.28 | 1738.42 | 78.47 | 860.43  | 0.50 | Terrestrial | Grassy slope  | Non-endemic |
| <i>Epipactis helleborine</i> | Kunming    | 2350 | 12.18 | 1019.14 | 72.30 | 1197.62 | 1.18 | Terrestrial | Grassy slope  | Non-endemic |
| <i>Epipactis helleborine</i> | Yangbi     | 2400 | 11.59 | 1044.23 | 72.19 | 1161.15 | 1.11 | Terrestrial | Dense forest  | Non-endemic |
| <i>Epipactis helleborine</i> | Lushui     | 2500 | 11.05 | 1195.57 | 70.63 | 911.65  | 0.76 | Terrestrial | Forest edge   | Non-endemic |
| <i>Epipactis helleborine</i> | Luquan     | 2500 | 10.72 | 965.09  | 73.60 | 1160.89 | 1.20 | Terrestrial | Sparse forest | Non-endemic |
| <i>Epipactis helleborine</i> | Yongde     | 2560 | 11.77 | 1266.25 | 69.00 | 1283.63 | 1.01 | Terrestrial | Forest edge   | Non-endemic |

|                              |           |      |       |         |       |         |      |             |               |             |
|------------------------------|-----------|------|-------|---------|-------|---------|------|-------------|---------------|-------------|
| <i>Epipactis helleborine</i> | Zhongdian | 2690 | 9.30  | 641.73  | 69.05 | 914.89  | 1.43 | Terrestrial | Dense forest  | Non-endemic |
| <i>Epipactis helleborine</i> | Deqin     | 2700 | 8.97  | 639.48  | 70.85 | 896.66  | 1.40 | Terrestrial | Dense forest  | Non-endemic |
| <i>Epipactis helleborine</i> | Deqin     | 2700 | 8.97  | 639.48  | 70.85 | 896.66  | 1.40 | Terrestrial | Grassy slope  | Non-endemic |
| <i>Epipactis helleborine</i> | Zhongdian | 2780 | 8.76  | 641.73  | 69.05 | 914.89  | 1.43 | Terrestrial | Grassy slope  | Non-endemic |
| <i>Epipactis helleborine</i> | Dongchuan | 2800 | 9.03  | 1021.73 | 71.65 | 1186.61 | 1.16 | Terrestrial | Shrubland     | Non-endemic |
| <i>Epipactis helleborine</i> | Zhongdian | 2800 | 8.64  | 641.73  | 69.05 | 914.89  | 1.43 | Terrestrial | Sparse forest | Non-endemic |
| <i>Epipactis helleborine</i> | Lijiang   | 2900 | 9.67  | 982.53  | 63.24 | 1077.65 | 1.10 | Terrestrial | Dense forest  | Non-endemic |
| <i>Epipactis helleborine</i> | Lijiang   | 2900 | 9.67  | 982.53  | 63.24 | 1077.65 | 1.10 | Terrestrial | Open site     | Non-endemic |
| <i>Epipactis helleborine</i> | Yongde    | 2990 | 9.19  | 1266.25 | 69.00 | 1283.63 | 1.01 | Terrestrial | Dense forest  | Non-endemic |
| <i>Epipactis helleborine</i> | Weixi     | 3000 | 7.43  | 970.70  | 69.95 | 1021.03 | 1.05 | Terrestrial | Forest edge   | Non-endemic |
| <i>Epipactis helleborine</i> | Gongshan  | 3000 | 6.08  | 1738.42 | 78.47 | 860.43  | 0.50 | Terrestrial | Grassy slope  | Non-endemic |
| <i>Epipactis helleborine</i> | Deqin     | 3000 | 7.17  | 639.48  | 70.85 | 896.66  | 1.40 | Terrestrial | Grassy slope  | Non-endemic |
| <i>Epipactis helleborine</i> | Eryuan    | 3000 | 8.53  | 745.16  | 68.27 | 1210.94 | 1.63 | Terrestrial | Meadow        | Non-endemic |
| <i>Epipactis helleborine</i> | Dali      | 3100 | 8.22  | 1082.70 | 68.61 | 1256.27 | 1.16 | Terrestrial | Grassy slope  | Non-endemic |
| <i>Epipactis helleborine</i> | Dali      | 3100 | 8.22  | 1082.70 | 68.61 | 1256.27 | 1.16 | Terrestrial | Open site     | Non-endemic |
| <i>Epipactis helleborine</i> | Zhongdian | 3190 | 6.30  | 641.73  | 69.05 | 914.89  | 1.43 | Terrestrial | Dense forest  | Non-endemic |
| <i>Epipactis helleborine</i> | Luquan    | 3190 | 6.58  | 965.09  | 73.60 | 1160.89 | 1.20 | Terrestrial | Shrubland     | Non-endemic |
| <i>Epipactis helleborine</i> | Zhongdian | 3200 | 6.24  | 641.73  | 69.05 | 914.89  | 1.43 | Terrestrial | Grassy slope  | Non-endemic |
| <i>Epipactis helleborine</i> | Zhongdian | 3280 | 5.76  | 641.73  | 69.05 | 914.89  | 1.43 | Terrestrial | Dense forest  | Non-endemic |
| <i>Epipactis helleborine</i> | Zhongdian | 3300 | 5.64  | 641.73  | 69.05 | 914.89  | 1.43 | Terrestrial | Grassy slope  | Non-endemic |
| <i>Epipactis helleborine</i> | Deqin     | 3500 | 4.17  | 639.48  | 70.85 | 896.66  | 1.40 | Terrestrial | Dense forest  | Non-endemic |
| <i>Epipactis helleborine</i> | Zhongdian | 3800 | 2.64  | 641.73  | 69.05 | 914.89  | 1.43 | Terrestrial | Dense forest  | Non-endemic |
| <i>Epipactis mairei</i>      | Zhenxiong | 1500 | 12.44 | 899.34  | 83.70 | 852.28  | 0.95 | Terrestrial | Dense forest  | Non-endemic |
| <i>Epipactis mairei</i>      | Luoping   | 2100 | 11.44 | 1686.24 | 82.51 | 1040.03 | 0.62 | Terrestrial | Shrubland     | Non-endemic |
| <i>Epipactis mairei</i>      | Eryuan    | 2400 | 12.13 | 745.16  | 68.27 | 1210.94 | 1.63 | Terrestrial | Sparse forest | Non-endemic |
| <i>Epipactis mairei</i>      | Lushui    | 2500 | 11.05 | 1195.57 | 70.63 | 911.65  | 0.76 | Terrestrial | Grassy slope  | Non-endemic |
| <i>Epipactis mairei</i>      | Heqing    | 2550 | 11.49 | 977.00  | 65.16 | 1211.84 | 1.24 | Terrestrial | Open site     | Non-endemic |
| <i>Epipactis mairei</i>      | Yongde    | 2560 | 11.77 | 1266.25 | 69.00 | 1283.63 | 1.01 | Terrestrial | Grassy slope  | Non-endemic |
| <i>Epipactis mairei</i>      | Zhenkang  | 2580 | 9.36  | 1602.96 | 81.14 | 1089.09 | 0.68 | Terrestrial | Grassy slope  | Non-endemic |
| <i>Epipactis mairei</i>      | Lijiang   | 2600 | 11.47 | 982.53  | 63.24 | 1077.65 | 1.10 | Terrestrial | Grassy slope  | Non-endemic |
| <i>Epipactis mairei</i>      | Dali      | 2600 | 11.22 | 1082.70 | 68.61 | 1256.27 | 1.16 | Terrestrial | Grassy slope  | Non-endemic |
| <i>Epipactis mairei</i>      | Eryuan    | 2740 | 10.09 | 745.16  | 68.27 | 1210.94 | 1.63 | Terrestrial | Grassy slope  | Non-endemic |
| <i>Epipactis mairei</i>      | Lijiang   | 2800 | 10.27 | 982.53  | 63.24 | 1077.65 | 1.10 | Terrestrial | Dense forest  | Non-endemic |
| <i>Epipactis mairei</i>      | Lijiang   | 2900 | 9.67  | 982.53  | 63.24 | 1077.65 | 1.10 | Terrestrial | Forest edge   | Non-endemic |
| <i>Epipactis mairei</i>      | Zhenkang  | 2900 | 7.44  | 1602.96 | 81.14 | 1089.09 | 0.68 | Terrestrial | Grassy slope  | Non-endemic |
| <i>Epipactis mairei</i>      | Weixi     | 3000 | 7.43  | 970.70  | 69.95 | 1021.03 | 1.05 | Terrestrial | Dense forest  | Non-endemic |

|                              |             |      |       |         |       |         |      |             |               |             |
|------------------------------|-------------|------|-------|---------|-------|---------|------|-------------|---------------|-------------|
| <i>Epipactis mairei</i>      | Lijiang     | 3000 | 9.07  | 982.53  | 63.24 | 1077.65 | 1.10 | Terrestrial | Grassy slope  | Non-endemic |
| <i>Epipactis mairei</i>      | Deqin       | 3000 | 7.17  | 639.48  | 70.85 | 896.66  | 1.40 | Terrestrial | Grassy slope  | Non-endemic |
| <i>Epipactis mairei</i>      | Dongchuan   | 3000 | 7.83  | 1021.73 | 71.65 | 1186.61 | 1.16 | Terrestrial | Grassy slope  | Non-endemic |
| <i>Epipactis mairei</i>      | Dongchuan   | 3000 | 7.83  | 1021.73 | 71.65 | 1186.61 | 1.16 | Terrestrial | Open site     | Non-endemic |
| <i>Epipactis mairei</i>      | Weixi       | 3200 | 6.23  | 970.70  | 69.95 | 1021.03 | 1.05 | Terrestrial | Dense forest  | Non-endemic |
| <i>Epipactis mairei</i>      | Zhongdian   | 3400 | 5.04  | 641.73  | 69.05 | 914.89  | 1.43 | Terrestrial | Open site     | Non-endemic |
| <i>Epipactis yunnanensis</i> | Lijiang     | 3300 | 7.27  | 982.53  | 63.24 | 1077.65 | 1.10 | Terrestrial | Meadow        | Non-endemic |
| <i>Epipogium aphyllum</i>    | Gongshan    | 2350 | 9.98  | 1738.42 | 78.47 | 860.43  | 0.50 | Saprophyte  | Dense forest  | Non-endemic |
| <i>Epipogium aphyllum</i>    | Gongshan    | 3400 | 3.68  | 1738.42 | 78.47 | 860.43  | 0.50 | Saprophyte  | Dense forest  | Non-endemic |
| <i>Epipogium roseum</i>      | Jinping     | 500  | 22.49 | 2305.17 | 83.81 | 1030.46 | 0.45 | Saprophyte  | Dense forest  | Non-endemic |
| <i>Epipogium roseum</i>      | Funing      | 700  | 19.42 | 1161.58 | 79.07 | 1147.17 | 0.99 | Saprophyte  | Dense forest  | Non-endemic |
| <i>Epipogium roseum</i>      | Pingbian    | 1250 | 17.32 | 1648.57 | 86.34 | 990.16  | 0.60 | Saprophyte  | Dense forest  | Non-endemic |
| <i>Epipogium roseum</i>      | Lancang     | 1300 | 17.90 | 1596.50 | 77.88 | 1183.80 | 0.74 | Saprophyte  | Dense forest  | Non-endemic |
| <i>Epipogium roseum</i>      | Xichou      | 1420 | 16.41 | 1267.54 | 82.98 | 985.97  | 0.78 | Saprophyte  | Dense forest  | Non-endemic |
| <i>Eria acervata</i>         | Jinghong    | 1100 | 19.12 | 1161.08 | 80.46 | 1256.19 | 1.08 | Epiphyte    | Shrubland     | Non-endemic |
| <i>Eria amica</i>            | Cangyuan    | 1250 | 17.72 | 1733.34 | 81.63 | 1060.82 | 0.61 | Epiphyte    | Dense forest  | Non-endemic |
| <i>Eria amica</i>            | Menghai     | 1300 | 17.76 | 1314.38 | 80.83 | 1150.91 | 0.88 | Epiphyte    | Forest edge   | Non-endemic |
| <i>Eria amica</i>            | Menghai     | 1300 | 17.76 | 1314.38 | 80.83 | 1150.91 | 0.88 | Epiphyte    | Sparse forest | Non-endemic |
| <i>Eria amica</i>            | Menghai     | 1540 | 16.32 | 1314.38 | 80.83 | 1150.91 | 0.88 | Epiphyte    | Shrubland     | Non-endemic |
| <i>Eria bambusifolia</i>     | Luchun      | 600  | 23.10 | 2013.54 | 78.64 | 1151.56 | 0.57 | Epiphyte    | Dense forest  | Non-endemic |
| <i>Eria bambusifolia</i>     | Luchun      | 780  | 22.02 | 2013.54 | 78.64 | 1151.56 | 0.57 | Epiphyte    | Dense forest  | Non-endemic |
| <i>Eria bambusifolia</i>     | Longling    | 1510 | 15.06 | 2098.66 | 84.65 | 973.45  | 0.46 | Epiphyte    | Dense forest  | Non-endemic |
| <i>Eria bambusifolia</i>     | Luchun      | 1580 | 17.22 | 2013.54 | 78.64 | 1151.56 | 0.57 | Epiphyte    | Dense forest  | Non-endemic |
| <i>Eria clausa</i>           | Jinghong    | 1100 | 19.12 | 1161.08 | 80.46 | 1256.19 | 1.08 | Epiphyte    | Shrubland     | Non-endemic |
| <i>Eria clausa</i>           | Malipo      | 1200 | 17.06 | 1063.54 | 85.83 | 1053.97 | 0.99 | Epiphyte    | Dense forest  | Non-endemic |
| <i>Eria clausa</i>           | Cangyuan    | 1200 | 18.02 | 1733.34 | 81.63 | 1060.82 | 0.61 | Epiphyte    | Dense forest  | Non-endemic |
| <i>Eria clausa</i>           | Menghai     | 1300 | 17.76 | 1314.38 | 80.83 | 1150.91 | 0.88 | Epiphyte    | Dense forest  | Non-endemic |
| <i>Eria clausa</i>           | Maguan      | 1400 | 16.61 | 1330.52 | 83.25 | 1086.43 | 0.82 | Epiphyte    | Sparse forest | Non-endemic |
| <i>Eria clausa</i>           | Shuangjiang | 1480 | 17.10 | 1006.64 | 75.26 | 1272.13 | 1.26 | Epiphyte    | Dense forest  | Non-endemic |
| <i>Eria clausa</i>           | Zhenkang    | 1640 | 15.00 | 1602.96 | 81.14 | 1089.09 | 0.68 | Epiphyte    | Dense forest  | Non-endemic |
| <i>Eria clausa</i>           | Lancang     | 1700 | 15.50 | 1596.50 | 77.88 | 1183.80 | 0.74 | Epiphyte    | Dense forest  | Non-endemic |
| <i>Eria clausa</i>           | Lancang     | 1700 | 15.50 | 1596.50 | 77.88 | 1183.80 | 0.74 | Epiphyte    | Dense forest  | Non-endemic |
| <i>Eria corneri</i>          | Mengla      | 680  | 21.12 | 1514.70 | 84.25 | 1146.68 | 0.76 | Epiphyte    | Dense forest  | Non-endemic |
| <i>Eria corneri</i>          | Funing      | 700  | 19.42 | 1161.58 | 79.07 | 1147.17 | 0.99 | Epiphyte    | Open site     | Non-endemic |
| <i>Eria corneri</i>          | Luchun      | 800  | 21.90 | 2013.54 | 78.64 | 1151.56 | 0.57 | Epiphyte    | Dense forest  | Non-endemic |
| <i>Eria corneri</i>          | Mengla      | 800  | 20.40 | 1514.70 | 84.25 | 1146.68 | 0.76 | Epiphyte    | Dense forest  | Non-endemic |

|                          |          |      |       |         |       |         |      |          |               |             |
|--------------------------|----------|------|-------|---------|-------|---------|------|----------|---------------|-------------|
| <i>Eria corneri</i>      | Xichou   | 1000 | 18.93 | 1267.54 | 82.98 | 985.97  | 0.78 | Epiphyte | Dense forest  | Non-endemic |
| <i>Eria corneri</i>      | Pingbian | 1100 | 18.22 | 1648.57 | 86.34 | 990.16  | 0.60 | Epiphyte | Dense forest  | Non-endemic |
| <i>Eria corneri</i>      | Jinghong | 1100 | 19.12 | 1161.08 | 80.46 | 1256.19 | 1.08 | Epiphyte | Dense forest  | Non-endemic |
| <i>Eria corneri</i>      | Malipo   | 1200 | 17.06 | 1063.54 | 85.83 | 1053.97 | 0.99 | Epiphyte | Shrubland     | Non-endemic |
| <i>Eria corneri</i>      | Hekou    | 1209 | 16.50 | 1768.58 | 84.25 | 1166.26 | 0.66 | Epiphyte | Dense forest  | Non-endemic |
| <i>Eria corneri</i>      | Xichou   | 1300 | 17.13 | 1267.54 | 82.98 | 985.97  | 0.78 | Epiphyte | Dense forest  | Non-endemic |
| <i>Eria corneri</i>      | Xichou   | 1500 | 15.93 | 1267.54 | 82.98 | 985.97  | 0.78 | Epiphyte | Dense forest  | Non-endemic |
| <i>Eria corneri</i>      | Hekou    | 1300 | 15.95 | 1768.58 | 84.25 | 1166.26 | 0.66 | Epiphyte | Dense forest  | Non-endemic |
| <i>Eria coronaria</i>    | Hekou    | 900  | 18.35 | 1768.58 | 84.25 | 1166.26 | 0.66 | Epiphyte | Dense forest  | Non-endemic |
| <i>Eria coronaria</i>    | Yanshan  | 1100 | 18.86 | 1003.57 | 79.42 | 1172.21 | 1.17 | Epiphyte | Dense forest  | Non-endemic |
| <i>Eria coronaria</i>    | Yanshan  | 1200 | 18.26 | 1003.57 | 79.42 | 1172.21 | 1.17 | Epiphyte | Dense forest  | Non-endemic |
| <i>Eria coronaria</i>    | Malipo   | 1200 | 17.06 | 1063.54 | 85.83 | 1053.97 | 0.99 | Epiphyte | Shrubland     | Non-endemic |
| <i>Eria coronaria</i>    | Gongshan | 1320 | 16.16 | 1738.42 | 78.47 | 860.43  | 0.50 | Epiphyte | Dense forest  | Non-endemic |
| <i>Eria coronaria</i>    | Gongshan | 1400 | 15.68 | 1738.42 | 78.47 | 860.43  | 0.50 | Epiphyte | Dense forest  | Non-endemic |
| <i>Eria coronaria</i>    | Xichou   | 1400 | 16.53 | 1267.54 | 82.98 | 985.97  | 0.78 | Epiphyte | Dense forest  | Non-endemic |
| <i>Eria coronaria</i>    | Gongshan | 1400 | 15.68 | 1738.42 | 78.47 | 860.43  | 0.50 | Epiphyte | Dense forest  | Non-endemic |
| <i>Eria coronaria</i>    | Gongshan | 1400 | 15.68 | 1738.42 | 78.47 | 860.43  | 0.50 | Epiphyte | Shrubland     | Non-endemic |
| <i>Eria coronaria</i>    | Xichou   | 1450 | 16.23 | 1267.54 | 82.98 | 985.97  | 0.78 | Epiphyte | Dense forest  | Non-endemic |
| <i>Eria coronaria</i>    | Xichou   | 1450 | 16.23 | 1267.54 | 82.98 | 985.97  | 0.78 | Epiphyte | Open site     | Non-endemic |
| <i>Eria coronaria</i>    | Xichou   | 1500 | 15.93 | 1267.54 | 82.98 | 985.97  | 0.78 | Epiphyte | Dense forest  | Non-endemic |
| <i>Eria coronaria</i>    | Xichou   | 1500 | 15.93 | 1267.54 | 82.98 | 985.97  | 0.78 | Epiphyte | Sparse forest | Non-endemic |
| <i>Eria coronaria</i>    | Gongshan | 1580 | 14.60 | 1738.42 | 78.47 | 860.43  | 0.50 | Epiphyte | Dense forest  | Non-endemic |
| <i>Eria coronaria</i>    | Pingbian | 1800 | 14.02 | 1648.57 | 86.34 | 990.16  | 0.60 | Epiphyte | Dense forest  | Non-endemic |
| <i>Eria coronaria</i>    | Jingdong | 1950 | 13.88 | 1128.40 | 76.80 | 1142.11 | 1.01 | Epiphyte | Dense forest  | Non-endemic |
| <i>Eria coronaria</i>    | Fugong   | 2000 | 12.06 | 1441.43 | 79.99 | 906.18  | 0.63 | Epiphyte | Dense forest  | Non-endemic |
| <i>Eria coronaria</i>    | Hekou    | 2020 | 11.63 | 1768.58 | 84.25 | 1166.26 | 0.66 | Epiphyte | Dense forest  | Non-endemic |
| <i>Eria coronaria</i>    | Malipo   | 2100 | 11.66 | 1063.54 | 85.83 | 1053.97 | 0.99 | Epiphyte | Shrubland     | Non-endemic |
| <i>Eria coronaria</i>    | Pingbian | 2200 | 11.62 | 1648.57 | 86.34 | 990.16  | 0.60 | Epiphyte | Dense forest  | Non-endemic |
| <i>Eria coronaria</i>    | Jingdong | 2500 | 10.58 | 1128.40 | 76.80 | 1142.11 | 1.01 | Epiphyte | Shrubland     | Non-endemic |
| <i>Eria coronaria</i>    | Zhenkang | 2700 | 8.64  | 1602.96 | 81.14 | 1089.09 | 0.68 | Epiphyte | Dense forest  | Non-endemic |
| <i>Eria dasyphylla</i>   | Menghai  | 1350 | 17.46 | 1314.38 | 80.83 | 1150.91 | 0.88 | Epiphyte | Dense forest  | Non-endemic |
| <i>Eria dasyphylla</i>   | Zhenkang | 1600 | 15.24 | 1602.96 | 81.14 | 1089.09 | 0.68 | Epiphyte | Dense forest  | Non-endemic |
| <i>Eria dasyphylla</i>   | Jinghong | 1950 | 14.02 | 1161.08 | 80.46 | 1256.19 | 1.08 | Epiphyte | Dense forest  | Non-endemic |
| <i>Eria donnaiensis</i>  | Maguan   | 1000 | 19.01 | 1330.52 | 83.25 | 1086.43 | 0.82 | Epiphyte | Shrubland     | Non-endemic |
| <i>Eria donnaiensis</i>  | Menghai  | 1500 | 16.56 | 1314.38 | 80.83 | 1150.91 | 0.88 | Epiphyte | Shrubland     | Non-endemic |
| <i>Eria graminifolia</i> | Gongshan | 1500 | 15.08 | 1738.42 | 78.47 | 860.43  | 0.50 | Epiphyte | Dense forest  | Non-endemic |

|                          |          |      |       |         |       |         |      |          |               |             |
|--------------------------|----------|------|-------|---------|-------|---------|------|----------|---------------|-------------|
| <i>Eria graminifolia</i> | Gongshan | 1700 | 13.88 | 1738.42 | 78.47 | 860.43  | 0.50 | Epiphyte | Dense forest  | Non-endemic |
| <i>Eria graminifolia</i> | Gongshan | 1800 | 13.28 | 1738.42 | 78.47 | 860.43  | 0.50 | Epiphyte | Dense forest  | Non-endemic |
| <i>Eria graminifolia</i> | Lushui   | 1900 | 14.65 | 1195.57 | 70.63 | 911.65  | 0.76 | Epiphyte | Dense forest  | Non-endemic |
| <i>Eria graminifolia</i> | Gongshan | 2000 | 12.08 | 1738.42 | 78.47 | 860.43  | 0.50 | Epiphyte | Sparse forest | Non-endemic |
| <i>Eria graminifolia</i> | Lushui   | 2270 | 12.43 | 1195.57 | 70.63 | 911.65  | 0.76 | Epiphyte | Dense forest  | Non-endemic |
| <i>Eria graminifolia</i> | Baoshan  | 2400 | 11.36 | 992.38  | 73.87 | 1160.15 | 1.17 | Epiphyte | Dense forest  | Non-endemic |
| <i>Eria graminifolia</i> | Fugong   | 2400 | 9.66  | 1441.43 | 79.99 | 906.18  | 0.63 | Epiphyte | Dense forest  | Non-endemic |
| <i>Eria graminifolia</i> | Lushui   | 2500 | 11.05 | 1195.57 | 70.63 | 911.65  | 0.76 | Epiphyte | Dense forest  | Non-endemic |
| <i>Eria graminifolia</i> | Gongshan | 2600 | 8.48  | 1738.42 | 78.47 | 860.43  | 0.50 | Epiphyte | Dense forest  | Non-endemic |
| <i>Eria graminifolia</i> | Gongshan | 2700 | 7.88  | 1738.42 | 78.47 | 860.43  | 0.50 | Epiphyte | Dense forest  | Non-endemic |
| <i>Eria graminifolia</i> | Gongshan | 3500 | 3.08  | 1738.42 | 78.47 | 860.43  | 0.50 | Epiphyte | Dense forest  | Non-endemic |
| <i>Eria hainanensis</i>  | Menghai  | 1350 | 17.46 | 1314.38 | 80.83 | 1150.91 | 0.88 | Epiphyte | Sparse forest | Non-endemic |
| <i>Eria javanica</i>     | Jinghong | 1000 | 19.72 | 1161.08 | 80.46 | 1256.19 | 1.08 | Epiphyte | Dense forest  | Non-endemic |
| <i>Eria javanica</i>     | Jinghong | 1150 | 18.82 | 1161.08 | 80.46 | 1256.19 | 1.08 | Epiphyte | Dense forest  | Non-endemic |
| <i>Eria marginata</i>    | Gongshan | 1300 | 16.28 | 1738.42 | 78.47 | 860.43  | 0.50 | Epiphyte | Dense forest  | Non-endemic |
| <i>Eria marginata</i>    | Gongshan | 1400 | 15.68 | 1738.42 | 78.47 | 860.43  | 0.50 | Epiphyte | Dense forest  | Non-endemic |
| <i>Eria marginata</i>    | Menghai  | 1530 | 16.38 | 1314.38 | 80.83 | 1150.91 | 0.88 | Epiphyte | Dense forest  | Non-endemic |
| <i>Eria marginata</i>    | Luxi     | 1750 | 14.58 | 1650.33 | 79.33 | 1183.39 | 0.72 | Epiphyte | Dense forest  | Non-endemic |
| <i>Eria marginata</i>    | Zhenkang | 2000 | 12.84 | 1602.96 | 81.14 | 1089.09 | 0.68 | Epiphyte | Dense forest  | Non-endemic |
| <i>Eria marginata</i>    | Luxi     | 2000 | 13.08 | 1650.33 | 79.33 | 1183.39 | 0.72 | Epiphyte | Dense forest  | Non-endemic |
| <i>Eria muscicola</i>    | Menghai  | 1750 | 15.06 | 1314.38 | 80.83 | 1150.91 | 0.88 | Epiphyte | Dense forest  | Non-endemic |
| <i>Eria muscicola</i>    | Jinghong | 1800 | 14.92 | 1161.08 | 80.46 | 1256.19 | 1.08 | Epiphyte | Dense forest  | Non-endemic |
| <i>Eria muscicola</i>    | Menghai  | 1800 | 14.76 | 1314.38 | 80.83 | 1150.91 | 0.88 | Epiphyte | Dense forest  | Non-endemic |
| <i>Eria muscicola</i>    | Lincang  | 2500 | 11.52 | 1165.84 | 72.08 | 1167.73 | 1.00 | Epiphyte | Dense forest  | Non-endemic |
| <i>Eria obvia</i>        | Menglian | 1050 | 19.28 | 1357.68 | 80.47 | 1185.94 | 0.87 | Epiphyte | Dense forest  | Non-endemic |
| <i>Eria obvia</i>        | Menghai  | 1340 | 17.52 | 1314.38 | 80.83 | 1150.91 | 0.88 | Epiphyte | Shrubland     | Non-endemic |
| <i>Eria obvia</i>        | Menghai  | 1500 | 16.56 | 1314.38 | 80.83 | 1150.91 | 0.88 | Epiphyte | Shrubland     | Non-endemic |
| <i>Eria pannea</i>       | Menghai  | 640  | 21.72 | 1314.38 | 80.83 | 1150.91 | 0.88 | Epiphyte | Dense forest  | Non-endemic |
| <i>Eria pannea</i>       | Mengla   | 900  | 19.80 | 1514.70 | 84.25 | 1146.68 | 0.76 | Epiphyte | Sparse forest | Non-endemic |
| <i>Eria pannea</i>       | Jinghong | 1100 | 19.12 | 1161.08 | 80.46 | 1256.19 | 1.08 | Epiphyte | Sparse forest | Non-endemic |
| <i>Eria pannea</i>       | Menghai  | 1150 | 18.66 | 1314.38 | 80.83 | 1150.91 | 0.88 | Epiphyte | Dense forest  | Non-endemic |
| <i>Eria pannea</i>       | Menghai  | 1300 | 17.76 | 1314.38 | 80.83 | 1150.91 | 0.88 | Epiphyte | Sparse forest | Non-endemic |
| <i>Eria pannea</i>       | Menghai  | 1300 | 17.76 | 1314.38 | 80.83 | 1150.91 | 0.88 | Epiphyte | Sparse forest | Non-endemic |
| <i>Eria pannea</i>       | Jinghong | 1349 | 17.63 | 1161.08 | 80.46 | 1256.19 | 1.08 | Epiphyte | Dense forest  | Non-endemic |
| <i>Eria pannea</i>       | Jinghong | 1400 | 17.32 | 1161.08 | 80.46 | 1256.19 | 1.08 | Epiphyte | Dense forest  | Non-endemic |
| <i>Eria pannea</i>       | Jinping  | 1450 | 16.79 | 2305.17 | 83.81 | 1030.46 | 0.45 | Epiphyte | Sparse forest | Non-endemic |

|                          |             |      |       |         |       |         |      |          |               |             |
|--------------------------|-------------|------|-------|---------|-------|---------|------|----------|---------------|-------------|
| <i>Eria pannea</i>       | Menghai     | 1530 | 16.38 | 1314.38 | 80.83 | 1150.91 | 0.88 | Epiphyte | Dense forest  | Non-endemic |
| <i>Eria pannea</i>       | Zhenkang    | 1600 | 15.24 | 1602.96 | 81.14 | 1089.09 | 0.68 | Epiphyte | Dense forest  | Non-endemic |
| <i>Eria pannea</i>       | Yongde      | 1700 | 16.93 | 1266.25 | 69.00 | 1283.63 | 1.01 | Epiphyte | Dense forest  | Non-endemic |
| <i>Eria pannea</i>       | Shuangjiang | 2200 | 12.78 | 1006.64 | 75.26 | 1272.13 | 1.26 | Epiphyte | Dense forest  | Non-endemic |
| <i>Eria pudica</i>       | Jinghong    | 1530 | 16.54 | 1161.08 | 80.46 | 1256.19 | 1.08 | Epiphyte | Shrubland     | Non-endemic |
| <i>Eria pulchella</i>    | Menghai     | 1100 | 18.96 | 1314.38 | 80.83 | 1150.91 | 0.88 | Epiphyte | Dense forest  | Non-endemic |
| <i>Eria pulchella</i>    | Menghai     | 1600 | 15.96 | 1314.38 | 80.83 | 1150.91 | 0.88 | Epiphyte | Shrubland     | Non-endemic |
| <i>Eria pulchella</i>    | Lancang     | 1700 | 15.50 | 1596.50 | 77.88 | 1183.80 | 0.74 | Epiphyte | Dense forest  | Non-endemic |
| <i>Eria pusilla</i>      | Malipo      | 1500 | 15.26 | 1063.54 | 85.83 | 1053.97 | 0.99 | Epiphyte | Sparse forest | Non-endemic |
| <i>Eria rhomboidalia</i> | Funing      | 700  | 19.42 | 1161.58 | 79.07 | 1147.17 | 0.99 | Epiphyte | Dense forest  | Non-endemic |
| <i>Eria rhomboidalia</i> | Xichou      | 870  | 19.71 | 1267.54 | 82.98 | 985.97  | 0.78 | Epiphyte | Open site     | Non-endemic |
| <i>Eria rhomboidalia</i> | Funing      | 1100 | 17.02 | 1161.58 | 79.07 | 1147.17 | 0.99 | Epiphyte | Sparse forest | Non-endemic |
| <i>Eria rhomboidalia</i> | Xichou      | 1650 | 15.03 | 1267.54 | 82.98 | 985.97  | 0.78 | Epiphyte | Sparse forest | Non-endemic |
| <i>Eria spicata</i>      | Xichou      | 1200 | 17.73 | 1267.54 | 82.98 | 985.97  | 0.78 | Epiphyte | Dense forest  | Non-endemic |
| <i>Eria spicata</i>      | Yanshan     | 1200 | 18.26 | 1003.57 | 79.42 | 1172.21 | 1.17 | Epiphyte | Dense forest  | Non-endemic |
| <i>Eria spicata</i>      | Xichou      | 1300 | 17.13 | 1267.54 | 82.98 | 985.97  | 0.78 | Epiphyte | Dense forest  | Non-endemic |
| <i>Eria spicata</i>      | Jinping     | 1690 | 15.35 | 2305.17 | 83.81 | 1030.46 | 0.45 | Epiphyte | Dense forest  | Non-endemic |
| <i>Eria spicata</i>      | Jinghong    | 1800 | 14.92 | 1161.08 | 80.46 | 1256.19 | 1.08 | Epiphyte | Dense forest  | Non-endemic |
| <i>Eria spicata</i>      | Yongde      | 1800 | 16.33 | 1266.25 | 69.00 | 1283.63 | 1.01 | Epiphyte | Grassy slope  | Non-endemic |
| <i>Eria spicata</i>      | Jingdong    | 2100 | 12.98 | 1128.40 | 76.80 | 1142.11 | 1.01 | Epiphyte | Dense forest  | Non-endemic |
| <i>Eria spicata</i>      | Jingdong    | 2400 | 11.18 | 1128.40 | 76.80 | 1142.11 | 1.01 | Epiphyte | Dense forest  | Non-endemic |
| <i>Eria spicata</i>      | Luchun      | 2500 | 11.70 | 2013.54 | 78.64 | 1151.56 | 0.57 | Epiphyte | Dense forest  | Non-endemic |
| <i>Eria spicata</i>      | Gongshan    | 2500 | 9.08  | 1738.42 | 78.47 | 860.43  | 0.50 | Epiphyte | Dense forest  | Non-endemic |
| <i>Eria spicata</i>      | Yongde      | 2500 | 12.13 | 1266.25 | 69.00 | 1283.63 | 1.01 | Epiphyte | Dense forest  | Non-endemic |
| <i>Eria spicata</i>      | Yongde      | 2500 | 12.13 | 1266.25 | 69.00 | 1283.63 | 1.01 | Epiphyte | Dense forest  | Non-endemic |
| <i>Eria spicata</i>      | Lincang     | 2800 | 9.72  | 1165.84 | 72.08 | 1167.73 | 1.00 | Epiphyte | Dense forest  | Non-endemic |
| <i>Eria stricta</i>      | Zhenkang    | 1100 | 18.24 | 1602.96 | 81.14 | 1089.09 | 0.68 | Epiphyte | Dense forest  | Non-endemic |
| <i>Eria stricta</i>      | Xichou      | 1300 | 17.13 | 1267.54 | 82.98 | 985.97  | 0.78 | Epiphyte | Dense forest  | Non-endemic |
| <i>Eria stricta</i>      | Malipo      | 1500 | 15.26 | 1063.54 | 85.83 | 1053.97 | 0.99 | Epiphyte | Dense forest  | Non-endemic |
| <i>Eria stricta</i>      | Luchun      | 1500 | 17.70 | 2013.54 | 78.64 | 1151.56 | 0.57 | Epiphyte | Dense forest  | Non-endemic |
| <i>Eria stricta</i>      | Longling    | 1600 | 14.52 | 2098.66 | 84.65 | 973.45  | 0.46 | Epiphyte | Dense forest  | Non-endemic |
| <i>Eria stricta</i>      | Luxi        | 1750 | 14.58 | 1650.33 | 79.33 | 1183.39 | 0.72 | Epiphyte | Dense forest  | Non-endemic |
| <i>Eria stricta</i>      | Luxi        | 1750 | 14.58 | 1650.33 | 79.33 | 1183.39 | 0.72 | Epiphyte | Dense forest  | Non-endemic |
| <i>Eria stricta</i>      | Luxi        | 1750 | 14.58 | 1650.33 | 79.33 | 1183.39 | 0.72 | Epiphyte | Dense forest  | Non-endemic |
| <i>Eria stricta</i>      | Luxi        | 1750 | 14.58 | 1650.33 | 79.33 | 1183.39 | 0.72 | Epiphyte | Dense forest  | Non-endemic |
| <i>Eria stricta</i>      | Longling    | 1800 | 13.32 | 2098.66 | 84.65 | 973.45  | 0.46 | Epiphyte | Dense forest  | Non-endemic |

|                                  |          |      |       |         |       |         |      |             |               |             |
|----------------------------------|----------|------|-------|---------|-------|---------|------|-------------|---------------|-------------|
| <i>Eria stricta</i>              | Luxi     | 2000 | 13.08 | 1650.33 | 79.33 | 1183.39 | 0.72 | Epiphyte    | Dense forest  | Non-endemic |
| <i>Eria szetschuanica</i>        | Weixi    | 2300 | 11.63 | 970.70  | 69.95 | 1021.03 | 1.05 | Epiphyte    | Forest edge   | Non-endemic |
| <i>Eria tomentosa</i>            | Luchun   | 600  | 23.10 | 2013.54 | 78.64 | 1151.56 | 0.57 | Epiphyte    | Forest edge   | Non-endemic |
| <i>Eria tomentosa</i>            | Mengla   | 650  | 21.30 | 1514.70 | 84.25 | 1146.68 | 0.76 | Epiphyte    | Dense forest  | Non-endemic |
| <i>Eria tomentosa</i>            | Jinghong | 700  | 21.52 | 1161.08 | 80.46 | 1256.19 | 1.08 | Epiphyte    | Sparse forest | Non-endemic |
| <i>Eria tomentosa</i>            | Cangyuan | 800  | 20.42 | 1733.34 | 81.63 | 1060.82 | 0.61 | Epiphyte    | Dense forest  | Non-endemic |
| <i>Eria tomentosa</i>            | Mengla   | 800  | 20.40 | 1514.70 | 84.25 | 1146.68 | 0.76 | Epiphyte    | Forest edge   | Non-endemic |
| <i>Eria tomentosa</i>            | Jinghong | 900  | 20.32 | 1161.08 | 80.46 | 1256.19 | 1.08 | Epiphyte    | Dense forest  | Non-endemic |
| <i>Eria tomentosa</i>            | Mengla   | 900  | 19.80 | 1514.70 | 84.25 | 1146.68 | 0.76 | Epiphyte    | Forest edge   | Non-endemic |
| <i>Eria tomentosa</i>            | Jinghong | 1050 | 19.42 | 1161.08 | 80.46 | 1256.19 | 1.08 | Epiphyte    | Dense forest  | Non-endemic |
| <i>Eria tomentosa</i>            | Menghai  | 1100 | 18.96 | 1314.38 | 80.83 | 1150.91 | 0.88 | Epiphyte    | Dense forest  | Non-endemic |
| <i>Eria tomentosa</i>            | Menghai  | 1180 | 18.48 | 1314.38 | 80.83 | 1150.91 | 0.88 | Epiphyte    | Dense forest  | Non-endemic |
| <i>Eria tomentosa</i>            | Menghai  | 1500 | 16.56 | 1314.38 | 80.83 | 1150.91 | 0.88 | Epiphyte    | Dense forest  | Non-endemic |
| <i>Eria tomentosa</i>            | Menghai  | 1250 | 18.06 | 1314.38 | 80.83 | 1150.91 | 0.88 | Epiphyte    | Sparse forest | Non-endemic |
| <i>Eria yanshanensis</i>         | Yanshan  | 1100 | 18.86 | 1003.57 | 79.42 | 1172.21 | 1.17 | Epiphyte    | Dense forest  | Endemic     |
| <i>Eria yunnanensis</i>          | Jinghong | 1500 | 16.72 | 1161.08 | 80.46 | 1256.19 | 1.08 | Epiphyte    | Dense forest  | Endemic     |
| <i>Erythrodendron chinensis</i>  | Mengla   | 1750 | 14.70 | 1514.70 | 84.25 | 1146.68 | 0.76 | Terrestrial | Dense forest  | Non-endemic |
| <i>Esmeralda clarkei</i>         | Jingdong | 1700 | 15.38 | 1128.40 | 76.80 | 1142.11 | 1.01 | Epiphyte    | Dense forest  | Non-endemic |
| <i>Esmeralda clarkei</i>         | Jingdong | 2100 | 12.98 | 1128.40 | 76.80 | 1142.11 | 1.01 | Epiphyte    | Forest edge   | Non-endemic |
| <i>Eulophia bracteosa</i>        | Pingbian | 1300 | 17.02 | 1648.57 | 86.34 | 990.16  | 0.60 | Terrestrial | Shrubland     | Non-endemic |
| <i>Eulophia spectabilis</i>      | Hekou    | 200  | 22.55 | 1768.58 | 84.25 | 1166.26 | 0.66 | Terrestrial | Dense forest  | Non-endemic |
| <i>Eulophia spectabilis</i>      | Jianshui | 1430 | 17.97 | 793.10  | 71.73 | 1413.81 | 1.78 | Terrestrial | Forest edge   | Non-endemic |
| <i>Eulophia spectabilis</i>      | Lancang  | 1500 | 16.70 | 1596.50 | 77.88 | 1183.80 | 0.74 | Terrestrial | Dense forest  | Non-endemic |
| <i>Eulophia spectabilis</i>      | Lancang  | 1550 | 16.40 | 1596.50 | 77.88 | 1183.80 | 0.74 | Terrestrial | Grassy slope  | Non-endemic |
| <i>Flickingeria albopurpurea</i> | Gongshan | 1600 | 14.48 | 1738.42 | 78.47 | 860.43  | 0.50 | Epiphyte    | Dense forest  | Non-endemic |
| <i>Flickingeria bicolor</i>      | Mengla   | 900  | 19.80 | 1514.70 | 84.25 | 1146.68 | 0.76 | Epiphyte    | Dense forest  | Endemic     |
| <i>Flickingeria concolor</i>     | Jinghong | 670  | 21.70 | 1161.08 | 80.46 | 1256.19 | 1.08 | Epiphyte    | Dense forest  | Endemic     |
| <i>Flickingeria fimbriata</i>    | Hekou    | 200  | 22.55 | 1768.58 | 84.25 | 1166.26 | 0.66 | Epiphyte    | Dense forest  | Non-endemic |
| <i>Flickingeria fimbriata</i>    | Maguan   | 1050 | 18.71 | 1330.52 | 83.25 | 1086.43 | 0.82 | Epiphyte    | Sparse forest | Non-endemic |
| <i>Flickingeria fimbriata</i>    | Malipo   | 1200 | 17.06 | 1063.54 | 85.83 | 1053.97 | 0.99 | Epiphyte    | Dense forest  | Non-endemic |
| <i>Flickingeria tricarinata</i>  | Mengla   | 800  | 20.40 | 1514.70 | 84.25 | 1146.68 | 0.76 | Epiphyte    | Dense forest  | Endemic     |
| <i>Galeola faberi</i>            | Jinping  | 1880 | 14.21 | 2305.17 | 83.81 | 1030.46 | 0.45 | Saprophyte  | Dense forest  | Non-endemic |
| <i>Galeola faberi</i>            | Gongshan | 2100 | 11.48 | 1738.42 | 78.47 | 860.43  | 0.50 | Saprophyte  | Dense forest  | Non-endemic |
| <i>Galeola faberi</i>            | Pingbian | 2200 | 11.62 | 1648.57 | 86.34 | 990.16  | 0.60 | Saprophyte  | Dense forest  | Non-endemic |
| <i>Galeola faberi</i>            | Weixi    | 2300 | 11.63 | 970.70  | 69.95 | 1021.03 | 1.05 | Saprophyte  | Dense forest  | Non-endemic |
| <i>Galeola faberi</i>            | Weixi    | 2500 | 10.43 | 970.70  | 69.95 | 1021.03 | 1.05 | Saprophyte  | Dense forest  | Non-endemic |

|                           |           |      |       |         |       |         |      |            |               |             |
|---------------------------|-----------|------|-------|---------|-------|---------|------|------------|---------------|-------------|
| <i>Galeola faberi</i>     | Fugong    | 3100 | 5.46  | 1441.43 | 79.99 | 906.18  | 0.63 | Saprophyte | Dense forest  | Non-endemic |
| <i>Galeola lindleyana</i> | Gongshan  | 1250 | 16.58 | 1738.42 | 78.47 | 860.43  | 0.50 | Saprophyte | Dense forest  | Non-endemic |
| <i>Galeola lindleyana</i> | Hekou     | 1250 | 16.25 | 1768.58 | 84.25 | 1166.26 | 0.66 | Saprophyte | Dense forest  | Non-endemic |
| <i>Galeola lindleyana</i> | Gongshan  | 1250 | 16.58 | 1738.42 | 78.47 | 860.43  | 0.50 | Saprophyte | Dense forest  | Non-endemic |
| <i>Galeola lindleyana</i> | Malipo    | 1300 | 16.46 | 1063.54 | 85.83 | 1053.97 | 0.99 | Saprophyte | Dense forest  | Non-endemic |
| <i>Galeola lindleyana</i> | Pingbian  | 1300 | 17.02 | 1648.57 | 86.34 | 990.16  | 0.60 | Saprophyte | Dense forest  | Non-endemic |
| <i>Galeola lindleyana</i> | Fugong    | 1300 | 16.26 | 1441.43 | 79.99 | 906.18  | 0.63 | Saprophyte | Dense forest  | Non-endemic |
| <i>Galeola lindleyana</i> | Xichou    | 1300 | 17.13 | 1267.54 | 82.98 | 985.97  | 0.78 | Saprophyte | Sparse forest | Non-endemic |
| <i>Galeola lindleyana</i> | Gongshan  | 1350 | 15.98 | 1738.42 | 78.47 | 860.43  | 0.50 | Saprophyte | Dense forest  | Non-endemic |
| <i>Galeola lindleyana</i> | Gongshan  | 1400 | 15.68 | 1738.42 | 78.47 | 860.43  | 0.50 | Saprophyte | Dense forest  | Non-endemic |
| <i>Galeola lindleyana</i> | Gongshan  | 1450 | 15.38 | 1738.42 | 78.47 | 860.43  | 0.50 | Saprophyte | Dense forest  | Non-endemic |
| <i>Galeola lindleyana</i> | Hekou     | 1480 | 14.87 | 1768.58 | 84.25 | 1166.26 | 0.66 | Saprophyte | Dense forest  | Non-endemic |
| <i>Galeola lindleyana</i> | Gongshan  | 1500 | 15.08 | 1738.42 | 78.47 | 860.43  | 0.50 | Saprophyte | Dense forest  | Non-endemic |
| <i>Galeola lindleyana</i> | Gongshan  | 1500 | 15.08 | 1738.42 | 78.47 | 860.43  | 0.50 | Saprophyte | Dense forest  | Non-endemic |
| <i>Galeola lindleyana</i> | Pingbian  | 1500 | 15.82 | 1648.57 | 86.34 | 990.16  | 0.60 | Saprophyte | Dense forest  | Non-endemic |
| <i>Galeola lindleyana</i> | Gongshan  | 1550 | 14.78 | 1738.42 | 78.47 | 860.43  | 0.50 | Saprophyte | Sparse forest | Non-endemic |
| <i>Galeola lindleyana</i> | Malipo    | 1600 | 14.66 | 1063.54 | 85.83 | 1053.97 | 0.99 | Saprophyte | Dense forest  | Non-endemic |
| <i>Galeola lindleyana</i> | Pingbian  | 1700 | 14.62 | 1648.57 | 86.34 | 990.16  | 0.60 | Saprophyte | Dense forest  | Non-endemic |
| <i>Galeola lindleyana</i> | Gongshan  | 1700 | 13.88 | 1738.42 | 78.47 | 860.43  | 0.50 | Saprophyte | Dense forest  | Non-endemic |
| <i>Galeola lindleyana</i> | Maguan    | 1700 | 14.81 | 1330.52 | 83.25 | 1086.43 | 0.82 | Saprophyte | Dense forest  | Non-endemic |
| <i>Galeola lindleyana</i> | Pingbian  | 1700 | 14.62 | 1648.57 | 86.34 | 990.16  | 0.60 | Saprophyte | Dense forest  | Non-endemic |
| <i>Galeola lindleyana</i> | Zhenxiong | 1780 | 10.76 | 899.34  | 83.70 | 852.28  | 0.95 | Saprophyte | Dense forest  | Non-endemic |
| <i>Galeola lindleyana</i> | Daguan    | 1800 | 11.02 | 987.00  | 80.05 | 896.37  | 0.91 | Saprophyte | Dense forest  | Non-endemic |
| <i>Galeola lindleyana</i> | Pingbian  | 1840 | 13.78 | 1648.57 | 86.34 | 990.16  | 0.60 | Saprophyte | Shrubland     | Non-endemic |
| <i>Galeola lindleyana</i> | Jingdong  | 1900 | 14.18 | 1128.40 | 76.80 | 1142.11 | 1.01 | Saprophyte | Dense forest  | Non-endemic |
| <i>Galeola lindleyana</i> | Gongshan  | 1900 | 12.68 | 1738.42 | 78.47 | 860.43  | 0.50 | Saprophyte | Dense forest  | Non-endemic |
| <i>Galeola lindleyana</i> | Luchun    | 1900 | 15.30 | 2013.54 | 78.64 | 1151.56 | 0.57 | Saprophyte | Dense forest  | Non-endemic |
| <i>Galeola lindleyana</i> | Gongshan  | 1900 | 12.68 | 1738.42 | 78.47 | 860.43  | 0.50 | Saprophyte | Forest edge   | Non-endemic |
| <i>Galeola lindleyana</i> | Gongshan  | 1900 | 12.68 | 1738.42 | 78.47 | 860.43  | 0.50 | Saprophyte | Shrubland     | Non-endemic |
| <i>Galeola lindleyana</i> | Gongshan  | 1900 | 12.68 | 1738.42 | 78.47 | 860.43  | 0.50 | Saprophyte | Shrubland     | Non-endemic |
| <i>Galeola lindleyana</i> | Jingdong  | 1950 | 13.88 | 1128.40 | 76.80 | 1142.11 | 1.01 | Saprophyte | Dense forest  | Non-endemic |
| <i>Galeola lindleyana</i> | Fugong    | 2000 | 12.06 | 1441.43 | 79.99 | 906.18  | 0.63 | Saprophyte | Dense forest  | Non-endemic |
| <i>Galeola lindleyana</i> | Gongshan  | 2000 | 12.08 | 1738.42 | 78.47 | 860.43  | 0.50 | Saprophyte | Dense forest  | Non-endemic |
| <i>Galeola lindleyana</i> | Gongshan  | 2000 | 12.08 | 1738.42 | 78.47 | 860.43  | 0.50 | Saprophyte | Dense forest  | Non-endemic |
| <i>Galeola lindleyana</i> | Tengchong | 2070 | 12.58 | 1501.45 | 78.06 | 857.93  | 0.57 | Saprophyte | Dense forest  | Non-endemic |
| <i>Galeola lindleyana</i> | Jingdong  | 2100 | 12.98 | 1128.40 | 76.80 | 1142.11 | 1.01 | Saprophyte | Dense forest  | Non-endemic |



|                                 |             |      |       |         |       |         |      |            |              |             |
|---------------------------------|-------------|------|-------|---------|-------|---------|------|------------|--------------|-------------|
| <i>Galeola lindleyana</i>       | Jingdong    | 2100 | 12.98 | 1128.40 | 76.80 | 1142.11 | 1.01 | Saprophyte | Dense forest | Non-endemic |
| <i>Galeola lindleyana</i>       | Fugong      | 2100 | 11.46 | 1441.43 | 79.99 | 906.18  | 0.63 | Saprophyte | Dense forest | Non-endemic |
| <i>Galeola lindleyana</i>       | Lushui      | 2500 | 11.05 | 1195.57 | 70.63 | 911.65  | 0.76 | Saprophyte | Dense forest | Non-endemic |
| <i>Galeola lindleyana</i>       | Lijiang     | 2500 | 12.07 | 982.53  | 63.24 | 1077.65 | 1.10 | Saprophyte | Dense forest | Non-endemic |
| <i>Galeola lindleyana</i>       | Gongshan    | 2500 | 9.08  | 1738.42 | 78.47 | 860.43  | 0.50 | Saprophyte | Dense forest | Non-endemic |
| <i>Galeola lindleyana</i>       | Tengchong   | 2700 | 8.80  | 1501.45 | 78.06 | 857.93  | 0.57 | Saprophyte | Forest edge  | Non-endemic |
| <i>Galeola lindleyana</i>       | Lijiang     | 3000 | 9.07  | 982.53  | 63.24 | 1077.65 | 1.10 | Saprophyte | Dense forest | Non-endemic |
| <i>Gastrochilus calceolaris</i> | Jinghong    | 860  | 20.56 | 1161.08 | 80.46 | 1256.19 | 1.08 | Epiphyte   | Dense forest | Non-endemic |
| <i>Gastrochilus calceolaris</i> | Lushui      | 1040 | 19.81 | 1195.57 | 70.63 | 911.65  | 0.76 | Epiphyte   | Dense forest | Non-endemic |
| <i>Gastrochilus calceolaris</i> | Maguan      | 1200 | 17.81 | 1330.52 | 83.25 | 1086.43 | 0.82 | Epiphyte   | Dense forest | Non-endemic |
| <i>Gastrochilus calceolaris</i> | Gongshan    | 1300 | 16.28 | 1738.42 | 78.47 | 860.43  | 0.50 | Epiphyte   | Dense forest | Non-endemic |
| <i>Gastrochilus calceolaris</i> | Menghai     | 1300 | 17.76 | 1314.38 | 80.83 | 1150.91 | 0.88 | Epiphyte   | Forest edge  | Non-endemic |
| <i>Gastrochilus calceolaris</i> | Gongshan    | 1320 | 16.16 | 1738.42 | 78.47 | 860.43  | 0.50 | Epiphyte   | Dense forest | Non-endemic |
| <i>Gastrochilus calceolaris</i> | Gongshan    | 1350 | 15.98 | 1738.42 | 78.47 | 860.43  | 0.50 | Epiphyte   | Dense forest | Non-endemic |
| <i>Gastrochilus calceolaris</i> | Gongshan    | 1350 | 15.98 | 1738.42 | 78.47 | 860.43  | 0.50 | Epiphyte   | Dense forest | Non-endemic |
| <i>Gastrochilus calceolaris</i> | Gongshan    | 1500 | 15.08 | 1738.42 | 78.47 | 860.43  | 0.50 | Epiphyte   | Dense forest | Non-endemic |
| <i>Gastrochilus calceolaris</i> | Jinghong    | 1500 | 16.72 | 1161.08 | 80.46 | 1256.19 | 1.08 | Epiphyte   | Dense forest | Non-endemic |
| <i>Gastrochilus calceolaris</i> | Jingdong    | 1600 | 15.98 | 1128.40 | 76.80 | 1142.11 | 1.01 | Epiphyte   | Dense forest | Non-endemic |
| <i>Gastrochilus calceolaris</i> | Fengqing    | 1700 | 16.00 | 1352.80 | 73.24 | 1172.52 | 0.87 | Epiphyte   | Dense forest | Non-endemic |
| <i>Gastrochilus calceolaris</i> | Gengma      | 1700 | 15.95 | 1327.70 | 77.28 | 1181.78 | 0.89 | Epiphyte   | Dense forest | Non-endemic |
| <i>Gastrochilus calceolaris</i> | Longling    | 1800 | 13.32 | 2098.66 | 84.65 | 973.45  | 0.46 | Epiphyte   | Dense forest | Non-endemic |
| <i>Gastrochilus calceolaris</i> | Longling    | 1800 | 13.32 | 2098.66 | 84.65 | 973.45  | 0.46 | Epiphyte   | Dense forest | Non-endemic |
| <i>Gastrochilus calceolaris</i> | Longling    | 1800 | 13.32 | 2098.66 | 84.65 | 973.45  | 0.46 | Epiphyte   | Dense forest | Non-endemic |
| <i>Gastrochilus calceolaris</i> | Longling    | 1800 | 13.32 | 2098.66 | 84.65 | 973.45  | 0.46 | Epiphyte   | Dense forest | Non-endemic |
| <i>Gastrochilus calceolaris</i> | Jingdong    | 1850 | 14.48 | 1128.40 | 76.80 | 1142.11 | 1.01 | Epiphyte   | Dense forest | Non-endemic |
| <i>Gastrochilus calceolaris</i> | Jingdong    | 1900 | 14.18 | 1128.40 | 76.80 | 1142.11 | 1.01 | Epiphyte   | Dense forest | Non-endemic |
| <i>Gastrochilus calceolaris</i> | Shuangjiang | 1920 | 14.46 | 1006.64 | 75.26 | 1272.13 | 1.26 | Epiphyte   | Dense forest | Non-endemic |
| <i>Gastrochilus calceolaris</i> | Zhenkang    | 2000 | 12.84 | 1602.96 | 81.14 | 1089.09 | 0.68 | Epiphyte   | Dense forest | Non-endemic |
| <i>Gastrochilus calceolaris</i> | Luchun      | 2000 | 14.70 | 2013.54 | 78.64 | 1151.56 | 0.57 | Epiphyte   | Forest edge  | Non-endemic |
| <i>Gastrochilus calceolaris</i> | Jingdong    | 2100 | 12.98 | 1128.40 | 76.80 | 1142.11 | 1.01 | Epiphyte   | Dense forest | Non-endemic |
| <i>Gastrochilus calceolaris</i> | Gongshan    | 2100 | 11.48 | 1738.42 | 78.47 | 860.43  | 0.50 | Epiphyte   | Dense forest | Non-endemic |
| <i>Gastrochilus calceolaris</i> | Lushui      | 2100 | 13.45 | 1195.57 | 70.63 | 911.65  | 0.76 | Epiphyte   | Dense forest | Non-endemic |
| <i>Gastrochilus calceolaris</i> | Jingdong    | 2100 | 12.98 | 1128.40 | 76.80 | 1142.11 | 1.01 | Epiphyte   | Forest edge  | Non-endemic |
| <i>Gastrochilus calceolaris</i> | Zhongdian   | 2200 | 12.24 | 641.73  | 69.05 | 914.89  | 1.43 | Epiphyte   | Dense forest | Non-endemic |
| <i>Gastrochilus calceolaris</i> | Jingdong    | 2400 | 11.18 | 1128.40 | 76.80 | 1142.11 | 1.01 | Epiphyte   | Dense forest | Non-endemic |
| <i>Gastrochilus calceolaris</i> | Lincang     | 2700 | 10.32 | 1165.84 | 72.08 | 1167.73 | 1.00 | Epiphyte   | Dense forest | Non-endemic |

|                                     |          |      |       |         |       |         |      |            |               |             |
|-------------------------------------|----------|------|-------|---------|-------|---------|------|------------|---------------|-------------|
| <i>Gastrochilus dasypogon</i>       | Jinghong | 950  | 20.02 | 1161.08 | 80.46 | 1256.19 | 1.08 | Epiphyte   | Shrubland     | Non-endemic |
| <i>Gastrochilus diannanensis</i>    | Mengla   | 750  | 20.70 | 1514.70 | 84.25 | 1146.68 | 0.76 | Epiphyte   | Dense forest  | Non-endemic |
| <i>Gastrochilus distichus</i>       | Jingdong | 2000 | 13.58 | 1128.40 | 76.80 | 1142.11 | 1.01 | Epiphyte   | Dense forest  | Non-endemic |
| <i>Gastrochilus distichus</i>       | Hekou    | 2000 | 11.75 | 1768.58 | 84.25 | 1166.26 | 0.66 | Epiphyte   | Dense forest  | Non-endemic |
| <i>Gastrochilus distichus</i>       | Eryuan   | 2100 | 13.93 | 745.16  | 68.27 | 1210.94 | 1.63 | Epiphyte   | Dense forest  | Non-endemic |
| <i>Gastrochilus distichus</i>       | Dali     | 2200 | 13.62 | 1082.70 | 68.61 | 1256.27 | 1.16 | Epiphyte   | Dense forest  | Non-endemic |
| <i>Gastrochilus distichus</i>       | Yongde   | 2326 | 13.17 | 1266.25 | 69.00 | 1283.63 | 1.01 | Epiphyte   | Dense forest  | Non-endemic |
| <i>Gastrochilus distichus</i>       | Dali     | 2350 | 12.72 | 1082.70 | 68.61 | 1256.27 | 1.16 | Epiphyte   | Dense forest  | Non-endemic |
| <i>Gastrochilus distichus</i>       | Longling | 2400 | 9.72  | 2098.66 | 84.65 | 973.45  | 0.46 | Epiphyte   | Dense forest  | Non-endemic |
| <i>Gastrochilus distichus</i>       | Jingdong | 2500 | 10.58 | 1128.40 | 76.80 | 1142.11 | 1.01 | Epiphyte   | Dense forest  | Non-endemic |
| <i>Gastrochilus distichus</i>       | Yongde   | 2600 | 11.53 | 1266.25 | 69.00 | 1283.63 | 1.01 | Epiphyte   | Dense forest  | Non-endemic |
| <i>Gastrochilus distichus</i>       | Zhenkang | 2700 | 8.64  | 1602.96 | 81.14 | 1089.09 | 0.68 | Epiphyte   | Dense forest  | Non-endemic |
| <i>Gastrochilus distichus</i>       | Dali     | 2700 | 10.62 | 1082.70 | 68.61 | 1256.27 | 1.16 | Epiphyte   | Dense forest  | Non-endemic |
| <i>Gastrochilus distichus</i>       | Yangbi   | 2800 | 9.19  | 1044.23 | 72.19 | 1161.15 | 1.11 | Epiphyte   | Dense forest  | Non-endemic |
| <i>Gastrochilus distichus</i>       | Dali     | 1500 | 17.82 | 1082.70 | 68.61 | 1256.27 | 1.16 | Epiphyte   | Sparse forest | Non-endemic |
| <i>Gastrochilus intermedius</i>     | Lancang  | 1500 | 16.70 | 1596.50 | 77.88 | 1183.80 | 0.74 | Epiphyte   | Dense forest  | Non-endemic |
| <i>Gastrochilus obliquus</i>        | Mengla   | 500  | 22.20 | 1514.70 | 84.25 | 1146.68 | 0.76 | Epiphyte   | Dense forest  | Non-endemic |
| <i>Gastrochilus obliquus</i>        | Mengla   | 600  | 21.60 | 1514.70 | 84.25 | 1146.68 | 0.76 | Epiphyte   | Dense forest  | Non-endemic |
| <i>Gastrochilus obliquus</i>        | Mengla   | 850  | 20.10 | 1514.70 | 84.25 | 1146.68 | 0.76 | Epiphyte   | Sparse forest | Non-endemic |
| <i>Gastrochilus obliquus</i>        | Jinghong | 860  | 20.56 | 1161.08 | 80.46 | 1256.19 | 1.08 | Epiphyte   | Dense forest  | Non-endemic |
| <i>Gastrochilus obliquus</i>        | Jinghong | 860  | 20.56 | 1161.08 | 80.46 | 1256.19 | 1.08 | Epiphyte   | Dense forest  | Non-endemic |
| <i>Gastrochilus obliquus</i>        | Jinghong | 950  | 20.02 | 1161.08 | 80.46 | 1256.19 | 1.08 | Epiphyte   | Shrubland     | Non-endemic |
| <i>Gastrochilus pseudodistichus</i> | Xichou   | 1000 | 18.93 | 1267.54 | 82.98 | 985.97  | 0.78 | Epiphyte   | Dense forest  | Non-endemic |
| <i>Gastrochilus pseudodistichus</i> | Malipo   | 1100 | 17.66 | 1063.54 | 85.83 | 1053.97 | 0.99 | Epiphyte   | Sparse forest | Non-endemic |
| <i>Gastrochilus pseudodistichus</i> | Xichou   | 1350 | 16.83 | 1267.54 | 82.98 | 985.97  | 0.78 | Epiphyte   | Dense forest  | Non-endemic |
| <i>Gastrochilus pseudodistichus</i> | Xichou   | 1500 | 15.93 | 1267.54 | 82.98 | 985.97  | 0.78 | Epiphyte   | Dense forest  | Non-endemic |
| <i>Gastrochilus pseudodistichus</i> | Malipo   | 1500 | 15.26 | 1063.54 | 85.83 | 1053.97 | 0.99 | Epiphyte   | Shrubland     | Non-endemic |
| <i>Gastrochilus pseudodistichus</i> | Malipo   | 1600 | 14.66 | 1063.54 | 85.83 | 1053.97 | 0.99 | Epiphyte   | Dense forest  | Non-endemic |
| <i>Gastrochilus pseudodistichus</i> | Pingbian | 1800 | 14.02 | 1648.57 | 86.34 | 990.16  | 0.60 | Epiphyte   | Dense forest  | Non-endemic |
| <i>Gastrochilus pseudodistichus</i> | Lancang  | 2200 | 12.50 | 1596.50 | 77.88 | 1183.80 | 0.74 | Epiphyte   | Dense forest  | Non-endemic |
| <i>Gastrochilus pseudodistichus</i> | Pingbian | 2200 | 11.62 | 1648.57 | 86.34 | 990.16  | 0.60 | Epiphyte   | Dense forest  | Non-endemic |
| <i>Gastrochilus pseudodistichus</i> | Gongshan | 2500 | 9.08  | 1738.42 | 78.47 | 860.43  | 0.50 | Epiphyte   | Dense forest  | Non-endemic |
| <i>Gastrochilus subpapillosus</i>   | Menghai  | 1180 | 18.48 | 1314.38 | 80.83 | 1150.91 | 0.88 | Epiphyte   | Dense forest  | Endemic     |
| <i>Gastrochilus subpapillosus</i>   | Jinghong | 1400 | 17.32 | 1161.08 | 80.46 | 1256.19 | 1.08 | Epiphyte   | Dense forest  | Endemic     |
| <i>Gastrodia albiflora</i>          | Songming | 1900 | 14.19 | 1010.18 | 74.14 | 1134.24 | 1.12 | saprophyte | Dense forest  | Non-endemic |
| <i>Gastrodia elata</i>              | Shiping  | 1700 | 16.36 | 919.48  | 75.04 | 1244.05 | 1.35 | saprophyte | Shrubland     | Non-endemic |

|                               |           |      |       |         |       |         |      |             |              |             |
|-------------------------------|-----------|------|-------|---------|-------|---------|------|-------------|--------------|-------------|
| <i>Gastrodia elata</i>        | Daguan    | 1950 | 10.12 | 987.00  | 80.05 | 896.37  | 0.91 | saprophyte  | Dense forest | Non-endemic |
| <i>Gastrodia elata</i>        | Yiliang   | 1950 | 10.58 | 751.45  | 71.67 | 1097.64 | 1.46 | saprophyte  | Shrubland    | Non-endemic |
| <i>Gastrodia elata</i>        | Weixi     | 2020 | 13.31 | 970.70  | 69.95 | 1021.03 | 1.05 | saprophyte  | Dense forest | Non-endemic |
| <i>Gastrodia elata</i>        | Yiliang   | 2100 | 9.68  | 751.45  | 71.67 | 1097.64 | 1.46 | saprophyte  | Dense forest | Non-endemic |
| <i>Gastrodia elata</i>        | Dali      | 2300 | 13.02 | 1082.70 | 68.61 | 1256.27 | 1.16 | saprophyte  | Dense forest | Non-endemic |
| <i>Gastrodia elata</i>        | Lijiang   | 2400 | 12.67 | 982.53  | 63.24 | 1077.65 | 1.10 | saprophyte  | Dense forest | Non-endemic |
| <i>Gastrodia elata</i>        | Zhongdian | 2900 | 8.04  | 641.73  | 69.05 | 914.89  | 1.43 | saprophyte  | Grassy slope | Non-endemic |
| <i>Gastrodia elata</i>        | Lijiang   | 3000 | 9.07  | 982.53  | 63.24 | 1077.65 | 1.10 | saprophyte  | Open site    | Non-endemic |
| <i>Gastrodia elata</i>        | Zhongdian | 3100 | 6.84  | 641.73  | 69.05 | 914.89  | 1.43 | saprophyte  | Dense forest | Non-endemic |
| <i>Gastrodia menghaiensis</i> | Menghai   | 1200 | 18.36 | 1314.38 | 80.83 | 1150.91 | 0.88 | saprophyte  | Dense forest | Endemic     |
| <i>Gastrodia tuberculata</i>  | Kunming   | 1900 | 14.88 | 1019.14 | 72.30 | 1197.62 | 1.18 | saprophyte  | Shrubland    | Endemic     |
| <i>Geodorum attenuatum</i>    | Menghai   | 1350 | 17.46 | 1314.38 | 80.83 | 1150.91 | 0.88 | Terrestrial | Dense forest | Non-endemic |
| <i>Geodorum densiflorum</i>   | Yuanyang  | 400  | 23.91 | 1100.28 | 77.18 | 1242.17 | 1.13 | Terrestrial | Dense forest | Non-endemic |
| <i>Geodorum densiflorum</i>   | Yuanjiang | 650  | 22.28 | 805.59  | 69.08 | 1652.32 | 2.05 | Terrestrial | Grassy slope | Non-endemic |
| <i>Geodorum densiflorum</i>   | Heqing    | 2000 | 14.79 | 977.00  | 65.16 | 1211.84 | 1.24 | Terrestrial | Grassy slope | Non-endemic |
| <i>Geodorum pulchellum</i>    | Pingbian  | 400  | 22.42 | 1648.57 | 86.34 | 990.16  | 0.60 | Terrestrial | Grassy slope | Non-endemic |
| <i>Geodorum recurvum</i>      | Shiping   | 1300 | 18.76 | 919.48  | 75.04 | 1244.05 | 1.35 | Terrestrial | Shrubland    | Non-endemic |
| <i>Goodyera biflora</i>       | Wenshan   | 1500 | 16.66 | 988.87  | 76.70 | 1272.98 | 1.29 | Epiphyte    | Dense forest | Non-endemic |
| <i>Goodyera biflora</i>       | Wenshan   | 2100 | 13.06 | 988.87  | 76.70 | 1272.98 | 1.29 | Epiphyte    | Dense forest | Non-endemic |
| <i>Goodyera brachystegia</i>  | Wenshan   | 1469 | 16.85 | 988.87  | 76.70 | 1272.98 | 1.29 | Terrestrial | Dense forest | Non-endemic |
| <i>Goodyera foliosa</i>       | Gongshan  | 1300 | 16.28 | 1738.42 | 78.47 | 860.43  | 0.50 | Terrestrial | Dense forest | Non-endemic |
| <i>Goodyera foliosa</i>       | Gongshan  | 1720 | 13.76 | 1738.42 | 78.47 | 860.43  | 0.50 | Terrestrial | Dense forest | Non-endemic |
| <i>Goodyera foliosa</i>       | Malipo    | 1800 | 13.46 | 1063.54 | 85.83 | 1053.97 | 0.99 | Terrestrial | Dense forest | Non-endemic |
| <i>Goodyera foliosa</i>       | Fugong    | 2000 | 12.06 | 1441.43 | 79.99 | 906.18  | 0.63 | Terrestrial | Dense forest | Non-endemic |
| <i>Goodyera foliosa</i>       | Jingdong  | 2100 | 12.98 | 1128.40 | 76.80 | 1142.11 | 1.01 | Terrestrial | Dense forest | Non-endemic |
| <i>Goodyera foliosa</i>       | Fugong    | 2500 | 9.06  | 1441.43 | 79.99 | 906.18  | 0.63 | Terrestrial | Dense forest | Non-endemic |
| <i>Goodyera foliosa</i>       | Luchun    | 2600 | 11.10 | 2013.54 | 78.64 | 1151.56 | 0.57 | Terrestrial | Dense forest | Non-endemic |
| <i>Goodyera foliosa</i>       | Wuding    | 2600 | 9.79  | 988.68  | 74.74 | 1188.19 | 1.20 | Terrestrial | Dense forest | Non-endemic |
| <i>Goodyera foliosa</i>       | Fugong    | 2800 | 7.26  | 1441.43 | 79.99 | 906.18  | 0.63 | Terrestrial | Dense forest | Non-endemic |
| <i>Goodyera foliosa</i>       | Fugong    | 2800 | 7.26  | 1441.43 | 79.99 | 906.18  | 0.63 | Terrestrial | Dense forest | Non-endemic |
| <i>Goodyera foliosa</i>       | Yongde    | 2820 | 10.21 | 1266.25 | 69.00 | 1283.63 | 1.01 | Terrestrial | Grassy slope | Non-endemic |
| <i>Goodyera foliosa</i>       | Yongde    | 2900 | 9.73  | 1266.25 | 69.00 | 1283.63 | 1.01 | Terrestrial | Dense forest | Non-endemic |
| <i>Goodyera foliosa</i>       | Yongde    | 3100 | 8.53  | 1266.25 | 69.00 | 1283.63 | 1.01 | Terrestrial | Meadow       | Non-endemic |
| <i>Goodyera foliosa</i>       | Yongde    | 3200 | 7.93  | 1266.25 | 69.00 | 1283.63 | 1.01 | Terrestrial | Meadow       | Non-endemic |
| <i>Goodyera fumata</i>        | Jinghong  | 750  | 21.22 | 1161.08 | 80.46 | 1256.19 | 1.08 | Terrestrial | Shrubland    | Non-endemic |
| <i>Goodyera fumata</i>        | Jinghong  | 900  | 20.32 | 1161.08 | 80.46 | 1256.19 | 1.08 | Terrestrial | Dense forest | Non-endemic |

|                         |           |      |       |         |       |         |      |             |               |             |
|-------------------------|-----------|------|-------|---------|-------|---------|------|-------------|---------------|-------------|
| <i>Goodyera fusca</i>   | Eryuan    | 3780 | 3.85  | 745.16  | 68.27 | 1210.94 | 1.63 | Terrestrial | Shrubland     | Non-endemic |
| <i>Goodyera fusca</i>   | Deqin     | 4500 | -1.83 | 639.48  | 70.85 | 896.66  | 1.40 | Terrestrial | Shrubland     | Non-endemic |
| <i>Goodyera henryi</i>  | Guangnan  | 1550 | 14.95 | 1044.26 | 78.94 | 1090.35 | 1.04 | Terrestrial | Grassy slope  | Non-endemic |
| <i>Goodyera henryi</i>  | Xichou    | 1800 | 14.13 | 1267.54 | 82.98 | 985.97  | 0.78 | Terrestrial | Dense forest  | Non-endemic |
| <i>Goodyera henryi</i>  | Jinghong  | 1800 | 14.92 | 1161.08 | 80.46 | 1256.19 | 1.08 | Terrestrial | Forest edge   | Non-endemic |
| <i>Goodyera henryi</i>  | Yongshan  | 1850 | 10.60 | 665.40  | 74.22 | 968.77  | 1.46 | Terrestrial | Dense forest  | Non-endemic |
| <i>Goodyera henryi</i>  | Yongde    | 2000 | 15.13 | 1266.25 | 69.00 | 1283.63 | 1.01 | Terrestrial | Dense forest  | Non-endemic |
| <i>Goodyera henryi</i>  | Wenshan   | 2300 | 11.86 | 988.87  | 76.70 | 1272.98 | 1.29 | Terrestrial | Dense forest  | Non-endemic |
| <i>Goodyera henryi</i>  | Fugong    | 2400 | 9.66  | 1441.43 | 79.99 | 906.18  | 0.63 | Terrestrial | Dense forest  | Non-endemic |
| <i>Goodyera henryi</i>  | Lushui    | 2500 | 11.05 | 1195.57 | 70.63 | 911.65  | 0.76 | Terrestrial | Dense forest  | Non-endemic |
| <i>Goodyera procera</i> | Funing    | 500  | 20.62 | 1161.58 | 79.07 | 1147.17 | 0.99 | Terrestrial | Dense forest  | Non-endemic |
| <i>Goodyera procera</i> | Funing    | 550  | 20.32 | 1161.58 | 79.07 | 1147.17 | 0.99 | Terrestrial | Forest edge   | Non-endemic |
| <i>Goodyera procera</i> | Pingbian  | 680  | 20.74 | 1648.57 | 86.34 | 990.16  | 0.60 | Terrestrial | Dense forest  | Non-endemic |
| <i>Goodyera procera</i> | Jinping   | 800  | 20.69 | 2305.17 | 83.81 | 1030.46 | 0.45 | Terrestrial | Dense forest  | Non-endemic |
| <i>Goodyera procera</i> | Lushui    | 900  | 20.65 | 1195.57 | 70.63 | 911.65  | 0.76 | Terrestrial | Dense forest  | Non-endemic |
| <i>Goodyera procera</i> | Jinghong  | 1100 | 19.12 | 1161.08 | 80.46 | 1256.19 | 1.08 | Terrestrial | Dense forest  | Non-endemic |
| <i>Goodyera procera</i> | Wenshan   | 1350 | 17.56 | 988.87  | 76.70 | 1272.98 | 1.29 | Terrestrial | Grassy slope  | Non-endemic |
| <i>Goodyera procera</i> | Pingbian  | 1460 | 16.06 | 1648.57 | 86.34 | 990.16  | 0.60 | Terrestrial | Grassy slope  | Non-endemic |
| <i>Goodyera procera</i> | Lancang   | 1550 | 16.40 | 1596.50 | 77.88 | 1183.80 | 0.74 | Terrestrial | Grassy slope  | Non-endemic |
| <i>Goodyera procera</i> | Pingbian  | 1730 | 14.44 | 1648.57 | 86.34 | 990.16  | 0.60 | Terrestrial | Dense forest  | Non-endemic |
| <i>Goodyera procera</i> | Yongde    | 2000 | 15.13 | 1266.25 | 69.00 | 1283.63 | 1.01 | Terrestrial | Dense forest  | Non-endemic |
| <i>Goodyera repens</i>  | Deqin     | 3000 | 7.17  | 639.48  | 70.85 | 896.66  | 1.40 | Epiphyte    | Sparse forest | Non-endemic |
| <i>Goodyera repens</i>  | Dongchuan | 2850 | 8.73  | 1021.73 | 71.65 | 1186.61 | 1.16 | Epiphyte    | Dense forest  | Non-endemic |
| <i>Goodyera repens</i>  | Yongde    | 2900 | 9.73  | 1266.25 | 69.00 | 1283.63 | 1.01 | Epiphyte    | Shrubland     | Non-endemic |
| <i>Goodyera repens</i>  | Dongchuan | 3200 | 6.63  | 1021.73 | 71.65 | 1186.61 | 1.16 | Epiphyte    | Dense forest  | Non-endemic |
| <i>Goodyera repens</i>  | Dongchuan | 3300 | 6.03  | 1021.73 | 71.65 | 1186.61 | 1.16 | Epiphyte    | Shrubland     | Non-endemic |
| <i>Goodyera repens</i>  | Jingdong  | 2160 | 12.62 | 1128.40 | 76.80 | 1142.11 | 1.01 | Terrestrial | Dense forest  | Non-endemic |
| <i>Goodyera repens</i>  | Gongshan  | 2500 | 9.08  | 1738.42 | 78.47 | 860.43  | 0.50 | Terrestrial | Dense forest  | Non-endemic |
| <i>Goodyera repens</i>  | Dali      | 2700 | 10.62 | 1082.70 | 68.61 | 1256.27 | 1.16 | Terrestrial | Dense forest  | Non-endemic |
| <i>Goodyera repens</i>  | Fugong    | 2900 | 6.66  | 1441.43 | 79.99 | 906.18  | 0.63 | Terrestrial | Dense forest  | Non-endemic |
| <i>Goodyera repens</i>  | Yangbi    | 2900 | 8.59  | 1044.23 | 72.19 | 1161.15 | 1.11 | Terrestrial | Dense forest  | Non-endemic |
| <i>Goodyera repens</i>  | Dongchuan | 2940 | 8.19  | 1021.73 | 71.65 | 1186.61 | 1.16 | Terrestrial | Dense forest  | Non-endemic |
| <i>Goodyera repens</i>  | Yongde    | 2950 | 9.43  | 1266.25 | 69.00 | 1283.63 | 1.01 | Terrestrial | Dense forest  | Non-endemic |
| <i>Goodyera repens</i>  | Yunlong   | 2980 | 8.17  | 1195.57 | 70.63 | 911.65  | 0.76 | Terrestrial | Dense forest  | Non-endemic |
| <i>Goodyera repens</i>  | Yunlong   | 3000 | 8.05  | 1195.57 | 70.63 | 911.65  | 0.76 | Terrestrial | Dense forest  | Non-endemic |
| <i>Goodyera repens</i>  | Zhongdian | 3100 | 6.84  | 641.73  | 69.05 | 914.89  | 1.43 | Terrestrial | Dense forest  | Non-endemic |

|                                    |           |      |       |         |       |         |      |             |               |             |
|------------------------------------|-----------|------|-------|---------|-------|---------|------|-------------|---------------|-------------|
| <i>Goodyera repens</i>             | Luquan    | 3190 | 6.58  | 965.09  | 73.60 | 1160.89 | 1.20 | Terrestrial | Shrubland     | Non-endemic |
| <i>Goodyera repens</i>             | Weixi     | 3300 | 5.63  | 970.70  | 69.95 | 1021.03 | 1.05 | Terrestrial | Dense forest  | Non-endemic |
| <i>Goodyera repens</i>             | Zhongdian | 3500 | 4.44  | 641.73  | 69.05 | 914.89  | 1.43 | Terrestrial | Dense forest  | Non-endemic |
| <i>Goodyera repens</i>             | Deqin     | 3800 | 2.37  | 639.48  | 70.85 | 896.66  | 1.40 | Terrestrial | Dense forest  | Non-endemic |
| <i>Goodyera revutina</i>           | Wenshan   | 1870 | 14.44 | 988.87  | 76.70 | 1272.98 | 1.29 | Terrestrial | Dense forest  | Non-endemic |
| <i>Goodyera robusta</i>            | Luchun    | 2100 | 14.10 | 2013.54 | 78.64 | 1151.56 | 0.57 | Terrestrial | Dense forest  | Non-endemic |
| <i>Goodyera schlechtendaliansa</i> | Xichou    | 1450 | 16.23 | 1267.54 | 82.98 | 985.97  | 0.78 | Terrestrial | Dense forest  | Non-endemic |
| <i>Goodyera schlechtendaliansa</i> | Zhenxiong | 1850 | 10.34 | 899.34  | 83.70 | 852.28  | 0.95 | Terrestrial | Dense forest  | Non-endemic |
| <i>Goodyera schlechtendaliansa</i> | Gongshan  | 2000 | 12.08 | 1738.42 | 78.47 | 860.43  | 0.50 | Terrestrial | Forest edge   | Non-endemic |
| <i>Goodyera schlechtendaliansa</i> | Pingbian  | 2100 | 12.22 | 1648.57 | 86.34 | 990.16  | 0.60 | Terrestrial | Sparse forest | Non-endemic |
| <i>Goodyera schlechtendaliansa</i> | Deqin     | 2300 | 11.37 | 639.48  | 70.85 | 896.66  | 1.40 | Terrestrial | Shrubland     | Non-endemic |
| <i>Goodyera schlechtendaliansa</i> | Lijiang   | 2700 | 10.87 | 982.53  | 63.24 | 1077.65 | 1.10 | Terrestrial | Dense forest  | Non-endemic |
| <i>Goodyera schlechtendaliansa</i> | Jingdong  | 2700 | 9.38  | 1128.40 | 76.80 | 1142.11 | 1.01 | Terrestrial | Grassy slope  | Non-endemic |
| <i>Goodyera schlechtendaliansa</i> | Yangbi    | 2800 | 9.19  | 1044.23 | 72.19 | 1161.15 | 1.11 | Terrestrial | Dense forest  | Non-endemic |
| <i>Goodyera schlechtendaliansa</i> | Jingdong  | 2830 | 8.60  | 1128.40 | 76.80 | 1142.11 | 1.01 | Terrestrial | Dense forest  | Non-endemic |
| <i>Goodyera velutina</i>           | Yiliang   | 1850 | 11.18 | 751.45  | 71.67 | 1097.64 | 1.46 | Terrestrial | Dense forest  | Non-endemic |
| <i>Goodyera viridiflora</i>        | Yanshan   | 1100 | 18.86 | 1003.57 | 79.42 | 1172.21 | 1.17 | Terrestrial | Dense forest  | Non-endemic |
| <i>Goodyera viridiflora</i>        | Yongde    | 1600 | 17.53 | 1266.25 | 69.00 | 1283.63 | 1.01 | Terrestrial | Dense forest  | Non-endemic |
| <i>Goodyera viridiflora</i>        | Yongde    | 1600 | 17.53 | 1266.25 | 69.00 | 1283.63 | 1.01 | Terrestrial | Forest edge   | Non-endemic |
| <i>Goodyera viridiflora</i>        | Yongde    | 3200 | 7.93  | 1266.25 | 69.00 | 1283.63 | 1.01 | Terrestrial | Meadow        | Non-endemic |
| <i>Goodyera yunnanensis</i>        | Deqin     | 3800 | 2.37  | 639.48  | 70.85 | 896.66  | 1.40 | Terrestrial | Dense forest  | Non-endemic |
| <i>Gymnadenia conopsea</i>         | Zhongdian | 3400 | 5.04  | 641.73  | 69.05 | 914.89  | 1.43 | Terrestrial | Dense forest  | Non-endemic |
| <i>Gymnadenia conopsea</i>         | Zhongdian | 3930 | 1.86  | 641.73  | 69.05 | 914.89  | 1.43 | Terrestrial | Dense forest  | Non-endemic |
| <i>Gymnadenia crassinervis</i>     | Gongshan  | 2000 | 12.08 | 1738.42 | 78.47 | 860.43  | 0.50 | Terrestrial | Grassy slope  | Non-endemic |
| <i>Gymnadenia crassinervis</i>     | Weixi     | 3600 | 3.83  | 970.70  | 69.95 | 1021.03 | 1.05 | Terrestrial | Grassy slope  | Non-endemic |
| <i>Gymnadenia orchidis</i>         | Heqing    | 2270 | 13.17 | 977.00  | 65.16 | 1211.84 | 1.24 | Terrestrial | Meadow        | Non-endemic |
| <i>Gymnadenia orchidis</i>         | Lijiang   | 2650 | 11.17 | 982.53  | 63.24 | 1077.65 | 1.10 | Terrestrial | Meadow        | Non-endemic |
| <i>Gymnadenia orchidis</i>         | Deqin     | 2700 | 8.97  | 639.48  | 70.85 | 896.66  | 1.40 | Terrestrial | Grassy slope  | Non-endemic |
| <i>Gymnadenia orchidis</i>         | Lijiang   | 2700 | 10.87 | 982.53  | 63.24 | 1077.65 | 1.10 | Terrestrial | Meadow        | Non-endemic |
| <i>Gymnadenia orchidis</i>         | Lijiang   | 2800 | 10.27 | 982.53  | 63.24 | 1077.65 | 1.10 | Terrestrial | Dense forest  | Non-endemic |
| <i>Gymnadenia orchidis</i>         | Zhongdian | 2800 | 8.64  | 641.73  | 69.05 | 914.89  | 1.43 | Terrestrial | Grassy slope  | Non-endemic |
| <i>Gymnadenia orchidis</i>         | Deqin     | 3000 | 7.17  | 639.48  | 70.85 | 896.66  | 1.40 | Terrestrial | Dense forest  | Non-endemic |
| <i>Gymnadenia orchidis</i>         | Zhongdian | 3000 | 7.44  | 641.73  | 69.05 | 914.89  | 1.43 | Terrestrial | Grassy slope  | Non-endemic |
| <i>Gymnadenia orchidis</i>         | Lijiang   | 3000 | 9.07  | 982.53  | 63.24 | 1077.65 | 1.10 | Terrestrial | Grassy slope  | Non-endemic |
| <i>Gymnadenia orchidis</i>         | Zhongdian | 3100 | 6.84  | 641.73  | 69.05 | 914.89  | 1.43 | Terrestrial | Grassy slope  | Non-endemic |
| <i>Gymnadenia orchidis</i>         | Lijiang   | 3140 | 8.23  | 982.53  | 63.24 | 1077.65 | 1.10 | Terrestrial | Shrubland     | Non-endemic |

|                            |           |      |       |         |       |         |      |             |              |             |
|----------------------------|-----------|------|-------|---------|-------|---------|------|-------------|--------------|-------------|
| <i>Gymnadenia orchidis</i> | Deqin     | 3170 | 6.15  | 639.48  | 70.85 | 896.66  | 1.40 | Terrestrial | Grassy slope | Non-endemic |
| <i>Gymnadenia orchidis</i> | Zhongdian | 3200 | 6.24  | 641.73  | 69.05 | 914.89  | 1.43 | Terrestrial | Dense forest | Non-endemic |
| <i>Gymnadenia orchidis</i> | Weixi     | 3200 | 6.23  | 970.70  | 69.95 | 1021.03 | 1.05 | Terrestrial | Grassy slope | Non-endemic |
| <i>Gymnadenia orchidis</i> | Dali      | 3200 | 7.62  | 1082.70 | 68.61 | 1256.27 | 1.16 | Terrestrial | Meadow       | Non-endemic |
| <i>Gymnadenia orchidis</i> | Lijiang   | 3300 | 7.27  | 982.53  | 63.24 | 1077.65 | 1.10 | Terrestrial | Dense forest | Non-endemic |
| <i>Gymnadenia orchidis</i> | Zhongdian | 3400 | 5.04  | 641.73  | 69.05 | 914.89  | 1.43 | Terrestrial | Dense forest | Non-endemic |
| <i>Gymnadenia orchidis</i> | Lijiang   | 3400 | 6.67  | 982.53  | 63.24 | 1077.65 | 1.10 | Terrestrial | Meadow       | Non-endemic |
| <i>Gymnadenia orchidis</i> | Weixi     | 3500 | 4.43  | 970.70  | 69.95 | 1021.03 | 1.05 | Terrestrial | Forest edge  | Non-endemic |
| <i>Gymnadenia orchidis</i> | Weixi     | 3500 | 4.43  | 970.70  | 69.95 | 1021.03 | 1.05 | Terrestrial | Grassy slope | Non-endemic |
| <i>Gymnadenia orchidis</i> | Zhongdian | 3500 | 4.44  | 641.73  | 69.05 | 914.89  | 1.43 | Terrestrial | Meadow       | Non-endemic |
| <i>Gymnadenia orchidis</i> | Fugong    | 3500 | 3.06  | 1441.43 | 79.99 | 906.18  | 0.63 | Terrestrial | Meadow       | Non-endemic |
| <i>Gymnadenia orchidis</i> | Gongshan  | 3600 | 2.48  | 1738.42 | 78.47 | 860.43  | 0.50 | Terrestrial | Forest edge  | Non-endemic |
| <i>Gymnadenia orchidis</i> | Weixi     | 3600 | 3.83  | 970.70  | 69.95 | 1021.03 | 1.05 | Terrestrial | Grassy slope | Non-endemic |
| <i>Gymnadenia orchidis</i> | Lijiang   | 3650 | 5.17  | 982.53  | 63.24 | 1077.65 | 1.10 | Terrestrial | Grassy slope | Non-endemic |
| <i>Gymnadenia orchidis</i> | Zhongdian | 3700 | 3.24  | 641.73  | 69.05 | 914.89  | 1.43 | Terrestrial | Meadow       | Non-endemic |
| <i>Gymnadenia orchidis</i> | Zhongdian | 3700 | 3.24  | 641.73  | 69.05 | 914.89  | 1.43 | Terrestrial | Shrubland    | Non-endemic |
| <i>Gymnadenia orchidis</i> | Zhongdian | 3700 | 3.24  | 641.73  | 69.05 | 914.89  | 1.43 | Terrestrial | Shrubland    | Non-endemic |
| <i>Gymnadenia orchidis</i> | Deqin     | 3800 | 2.37  | 639.48  | 70.85 | 896.66  | 1.40 | Terrestrial | Grassy slope | Non-endemic |
| <i>Gymnadenia orchidis</i> | Zhongdian | 3800 | 2.64  | 641.73  | 69.05 | 914.89  | 1.43 | Terrestrial | Meadow       | Non-endemic |
| <i>Gymnadenia orchidis</i> | Deqin     | 3800 | 2.37  | 639.48  | 70.85 | 896.66  | 1.40 | Terrestrial | Meadow       | Non-endemic |
| <i>Gymnadenia orchidis</i> | Lijiang   | 3800 | 4.27  | 982.53  | 63.24 | 1077.65 | 1.10 | Terrestrial | Open site    | Non-endemic |
| <i>Gymnadenia orchidis</i> | Zhongdian | 3800 | 2.64  | 641.73  | 69.05 | 914.89  | 1.43 | Terrestrial | Shrubland    | Non-endemic |
| <i>Gymnadenia orchidis</i> | Zhongdian | 3800 | 2.64  | 641.73  | 69.05 | 914.89  | 1.43 | Terrestrial | Shrubland    | Non-endemic |
| <i>Gymnadenia orchidis</i> | Zhongdian | 3850 | 2.34  | 641.73  | 69.05 | 914.89  | 1.43 | Terrestrial | Meadow       | Non-endemic |
| <i>Gymnadenia orchidis</i> | Weixi     | 3900 | 2.03  | 970.70  | 69.95 | 1021.03 | 1.05 | Terrestrial | Dense forest | Non-endemic |
| <i>Gymnadenia orchidis</i> | Deqin     | 3900 | 1.77  | 639.48  | 70.85 | 896.66  | 1.40 | Terrestrial | Grassy slope | Non-endemic |
| <i>Gymnadenia orchidis</i> | Lijiang   | 3900 | 3.67  | 982.53  | 63.24 | 1077.65 | 1.10 | Terrestrial | Meadow       | Non-endemic |
| <i>Gymnadenia orchidis</i> | Lijiang   | 3900 | 3.67  | 982.53  | 63.24 | 1077.65 | 1.10 | Terrestrial | Open site    | Non-endemic |
| <i>Gymnadenia orchidis</i> | Fugong    | 4000 | 0.06  | 1441.43 | 79.99 | 906.18  | 0.63 | Terrestrial | Dense forest | Non-endemic |
| <i>Gymnadenia orchidis</i> | Weixi     | 4000 | 1.43  | 970.70  | 69.95 | 1021.03 | 1.05 | Terrestrial | Grassy slope | Non-endemic |
| <i>Gymnadenia orchidis</i> | Zhongdian | 4000 | 1.44  | 641.73  | 69.05 | 914.89  | 1.43 | Terrestrial | Grassy slope | Non-endemic |
| <i>Gymnadenia orchidis</i> | Lijiang   | 4000 | 3.07  | 982.53  | 63.24 | 1077.65 | 1.10 | Terrestrial | Meadow       | Non-endemic |
| <i>Gymnadenia orchidis</i> | Fugong    | 4000 | 0.06  | 1441.43 | 79.99 | 906.18  | 0.63 | Terrestrial | Shrubland    | Non-endemic |
| <i>Gymnadenia orchidis</i> | Weixi     | 4000 | 1.43  | 970.70  | 69.95 | 1021.03 | 1.05 | Terrestrial | Shrubland    | Non-endemic |
| <i>Gymnadenia orchidis</i> | Gongshan  | 4100 | -0.52 | 1738.42 | 78.47 | 860.43  | 0.50 | Terrestrial | Dense forest | Non-endemic |
| <i>Gymnadenia orchidis</i> | Dongchuan | 4150 | 0.93  | 1021.73 | 71.65 | 1186.61 | 1.16 | Terrestrial | Meadow       | Non-endemic |

|                              |           |      |       |         |       |         |      |             |              |             |
|------------------------------|-----------|------|-------|---------|-------|---------|------|-------------|--------------|-------------|
| <i>Habenaria acuifera</i>    | Yuanmou   | 1700 | 18.08 | 657.16  | 56.45 | 1629.23 | 2.48 | Terrestrial | Shrubland    | Non-endemic |
| <i>Habenaria acuifera</i>    | Fengqing  | 1750 | 15.70 | 1352.80 | 73.24 | 1172.52 | 0.87 | Terrestrial | Shrubland    | Non-endemic |
| <i>Habenaria acuifera</i>    | Yangbi    | 2000 | 13.99 | 1044.23 | 72.19 | 1161.15 | 1.11 | Terrestrial | Shrubland    | Non-endemic |
| <i>Habenaria aitchisonii</i> | Heqing    | 1550 | 17.49 | 977.00  | 65.16 | 1211.84 | 1.24 | Terrestrial | Grassy slope | Non-endemic |
| <i>Habenaria aitchisonii</i> | Anning    | 2100 | 13.43 | 896.67  | 71.23 | 1167.91 | 1.30 | Terrestrial | Shrubland    | Non-endemic |
| <i>Habenaria aitchisonii</i> | Anning    | 2200 | 12.83 | 896.67  | 71.23 | 1167.91 | 1.30 | Terrestrial | Dense forest | Non-endemic |
| <i>Habenaria aitchisonii</i> | Kunming   | 2400 | 11.88 | 1019.14 | 72.30 | 1197.62 | 1.18 | Terrestrial | Open site    | Non-endemic |
| <i>Habenaria aitchisonii</i> | Yangbi    | 2500 | 10.99 | 1044.23 | 72.19 | 1161.15 | 1.11 | Terrestrial | Dense forest | Non-endemic |
| <i>Habenaria aitchisonii</i> | Zhongdian | 2500 | 10.44 | 641.73  | 69.05 | 914.89  | 1.43 | Terrestrial | Shrubland    | Non-endemic |
| <i>Habenaria aitchisonii</i> | Heqing    | 2650 | 10.89 | 977.00  | 65.16 | 1211.84 | 1.24 | Terrestrial | Dense forest | Non-endemic |
| <i>Habenaria aitchisonii</i> | Lijiang   | 2650 | 11.17 | 982.53  | 63.24 | 1077.65 | 1.10 | Terrestrial | Dense forest | Non-endemic |
| <i>Habenaria aitchisonii</i> | Yongde    | 2660 | 11.17 | 1266.25 | 69.00 | 1283.63 | 1.01 | Terrestrial | Shrubland    | Non-endemic |
| <i>Habenaria aitchisonii</i> | Deqin     | 2800 | 8.37  | 639.48  | 70.85 | 896.66  | 1.40 | Terrestrial | Dense forest | Non-endemic |
| <i>Habenaria aitchisonii</i> | Zhongdian | 2800 | 8.64  | 641.73  | 69.05 | 914.89  | 1.43 | Terrestrial | Grassy slope | Non-endemic |
| <i>Habenaria aitchisonii</i> | Dongchuan | 3000 | 7.83  | 1021.73 | 71.65 | 1186.61 | 1.16 | Terrestrial | Grassy slope | Non-endemic |
| <i>Habenaria aitchisonii</i> | Deqin     | 3000 | 7.17  | 639.48  | 70.85 | 896.66  | 1.40 | Terrestrial | Shrubland    | Non-endemic |
| <i>Habenaria aitchisonii</i> | Zhongdian | 3050 | 7.14  | 641.73  | 69.05 | 914.89  | 1.43 | Terrestrial | Dense forest | Non-endemic |
| <i>Habenaria aitchisonii</i> | Zhongdian | 3200 | 6.24  | 641.73  | 69.05 | 914.89  | 1.43 | Terrestrial | Shrubland    | Non-endemic |
| <i>Habenaria aitchisonii</i> | Deqin     | 3300 | 5.37  | 639.48  | 70.85 | 896.66  | 1.40 | Terrestrial | Dense forest | Non-endemic |
| <i>Habenaria aitchisonii</i> | Luquan    | 3358 | 5.57  | 965.09  | 73.60 | 1160.89 | 1.20 | Terrestrial | Shrubland    | Non-endemic |
| <i>Habenaria aitchisonii</i> | Lijiang   | 3400 | 6.67  | 982.53  | 63.24 | 1077.65 | 1.10 | Terrestrial | Shrubland    | Non-endemic |
| <i>Habenaria aitchisonii</i> | Lijiang   | 3550 | 5.77  | 982.53  | 63.24 | 1077.65 | 1.10 | Terrestrial | Dense forest | Non-endemic |
| <i>Habenaria aitchisonii</i> | Lijiang   | 3700 | 4.87  | 982.53  | 63.24 | 1077.65 | 1.10 | Terrestrial | Shrubland    | Non-endemic |
| <i>Habenaria aitchisonii</i> | Heqing    | 3800 | 3.99  | 977.00  | 65.16 | 1211.84 | 1.24 | Terrestrial | Grassy slope | Non-endemic |
| <i>Habenaria aitchisonii</i> | Heqing    | 3800 | 3.99  | 977.00  | 65.16 | 1211.84 | 1.24 | Terrestrial | Grassy slope | Non-endemic |
| <i>Habenaria aitchisonii</i> | Heqing    | 3800 | 3.99  | 977.00  | 65.16 | 1211.84 | 1.24 | Terrestrial | Grassy slope | Non-endemic |
| <i>Habenaria aitchisonii</i> | Dongchuan | 4000 | 1.83  | 1021.73 | 71.65 | 1186.61 | 1.16 | Terrestrial | Meadow       | Non-endemic |
| <i>Habenaria aitchisonii</i> | Dongchuan | 4000 | 1.83  | 1021.73 | 71.65 | 1186.61 | 1.16 | Terrestrial | Meadow       | Non-endemic |
| <i>Habenaria balfouriana</i> | Lijiang   | 3000 | 9.07  | 982.53  | 63.24 | 1077.65 | 1.10 | Terrestrial | Grassy slope | Non-endemic |
| <i>Habenaria balfouriana</i> | Zhongdian | 3000 | 7.44  | 641.73  | 69.05 | 914.89  | 1.43 | Terrestrial | Meadow       | Non-endemic |
| <i>Habenaria balfouriana</i> | Heqing    | 3100 | 8.19  | 977.00  | 65.16 | 1211.84 | 1.24 | Terrestrial | Meadow       | Non-endemic |
| <i>Habenaria balfouriana</i> | Zhongdian | 3300 | 5.64  | 641.73  | 69.05 | 914.89  | 1.43 | Terrestrial | Meadow       | Non-endemic |
| <i>Habenaria balfouriana</i> | Lijiang   | 3400 | 6.67  | 982.53  | 63.24 | 1077.65 | 1.10 | Terrestrial | Meadow       | Non-endemic |
| <i>Habenaria balfouriana</i> | Lijiang   | 3500 | 6.07  | 982.53  | 63.24 | 1077.65 | 1.10 | Terrestrial | Grassy slope | Non-endemic |
| <i>Habenaria balfouriana</i> | Weixi     | 3600 | 3.83  | 970.70  | 69.95 | 1021.03 | 1.05 | Terrestrial | Grassy slope | Non-endemic |
| <i>Habenaria balfouriana</i> | Zhongdian | 3700 | 3.24  | 641.73  | 69.05 | 914.89  | 1.43 | Terrestrial | Dense forest | Non-endemic |

|                             |            |      |       |         |       |         |      |             |               |             |
|-----------------------------|------------|------|-------|---------|-------|---------|------|-------------|---------------|-------------|
| <i>Habenaria ciliolaris</i> | Mengla     | 550  | 21.90 | 1514.70 | 84.25 | 1146.68 | 0.76 | Terrestrial | Dense forest  | Non-endemic |
| <i>Habenaria ciliolaris</i> | Jinghong   | 650  | 21.82 | 1161.08 | 80.46 | 1256.19 | 1.08 | Terrestrial | Forest edge   | Non-endemic |
| <i>Habenaria ciliolaris</i> | Mengla     | 700  | 21.00 | 1514.70 | 84.25 | 1146.68 | 0.76 | Terrestrial | Sparse forest | Non-endemic |
| <i>Habenaria ciliolaris</i> | Mengla     | 720  | 20.88 | 1514.70 | 84.25 | 1146.68 | 0.76 | Terrestrial | Dense forest  | Non-endemic |
| <i>Habenaria ciliolaris</i> | Mengla     | 920  | 19.68 | 1514.70 | 84.25 | 1146.68 | 0.76 | Terrestrial | Dense forest  | Non-endemic |
| <i>Habenaria ciliolaris</i> | Jinghong   | 920  | 20.20 | 1161.08 | 80.46 | 1256.19 | 1.08 | Terrestrial | Dense forest  | Non-endemic |
| <i>Habenaria ciliolaris</i> | Jinghong   | 920  | 20.20 | 1161.08 | 80.46 | 1256.19 | 1.08 | Terrestrial | Forest edge   | Non-endemic |
| <i>Habenaria ciliolaris</i> | Jinghong   | 1000 | 19.72 | 1161.08 | 80.46 | 1256.19 | 1.08 | Terrestrial | Dense forest  | Non-endemic |
| <i>Habenaria ciliolaris</i> | Luquan     | 2025 | 13.57 | 965.09  | 73.60 | 1160.89 | 1.20 | Terrestrial | Dense forest  | Non-endemic |
| <i>Habenaria davidii</i>    | Eryuan     | 1840 | 15.49 | 745.16  | 68.27 | 1210.94 | 1.63 | Terrestrial | Grassy slope  | Non-endemic |
| <i>Habenaria davidii</i>    | Jiangchuan | 1950 | 14.30 | 872.74  | 74.72 | 1181.99 | 1.35 | Terrestrial | Shrubland     | Non-endemic |
| <i>Habenaria davidii</i>    | Kunming    | 1970 | 14.46 | 1019.14 | 72.30 | 1197.62 | 1.18 | Terrestrial | Grassy slope  | Non-endemic |
| <i>Habenaria davidii</i>    | Tonghai    | 2000 | 14.61 | 891.56  | 72.93 | 1238.30 | 1.39 | Terrestrial | Meadow        | Non-endemic |
| <i>Habenaria davidii</i>    | Kunming    | 2030 | 14.10 | 1019.14 | 72.30 | 1197.62 | 1.18 | Terrestrial | Dense forest  | Non-endemic |
| <i>Habenaria davidii</i>    | Luoping    | 2100 | 11.44 | 1686.24 | 82.51 | 1040.03 | 0.62 | Terrestrial | Grassy slope  | Non-endemic |
| <i>Habenaria davidii</i>    | Kunming    | 2100 | 13.68 | 1019.14 | 72.30 | 1197.62 | 1.18 | Terrestrial | Meadow        | Non-endemic |
| <i>Habenaria davidii</i>    | Yongde     | 2250 | 13.63 | 1266.25 | 69.00 | 1283.63 | 1.01 | Terrestrial | Grassy slope  | Non-endemic |
| <i>Habenaria davidii</i>    | Fengqing   | 2300 | 12.40 | 1352.80 | 73.24 | 1172.52 | 0.87 | Terrestrial | Grassy slope  | Non-endemic |
| <i>Habenaria davidii</i>    | Yongde     | 2300 | 13.33 | 1266.25 | 69.00 | 1283.63 | 1.01 | Terrestrial | Grassy slope  | Non-endemic |
| <i>Habenaria davidii</i>    | Yongde     | 2400 | 12.73 | 1266.25 | 69.00 | 1283.63 | 1.01 | Terrestrial | Grassy slope  | Non-endemic |
| <i>Habenaria davidii</i>    | Zhongdian  | 2470 | 10.62 | 641.73  | 69.05 | 914.89  | 1.43 | Terrestrial | Grassy slope  | Non-endemic |
| <i>Habenaria davidii</i>    | Lijiang    | 2500 | 12.07 | 982.53  | 63.24 | 1077.65 | 1.10 | Terrestrial | Shrubland     | Non-endemic |
| <i>Habenaria davidii</i>    | Eryuan     | 2560 | 11.17 | 745.16  | 68.27 | 1210.94 | 1.63 | Terrestrial | Grassy slope  | Non-endemic |
| <i>Habenaria davidii</i>    | Lijiang    | 2700 | 10.87 | 982.53  | 63.24 | 1077.65 | 1.10 | Terrestrial | Grassy slope  | Non-endemic |
| <i>Habenaria davidii</i>    | Lijiang    | 2800 | 10.27 | 982.53  | 63.24 | 1077.65 | 1.10 | Terrestrial | Grassy slope  | Non-endemic |
| <i>Habenaria davidii</i>    | Zhongdian  | 2900 | 8.04  | 641.73  | 69.05 | 914.89  | 1.43 | Terrestrial | Meadow        | Non-endemic |
| <i>Habenaria davidii</i>    | Lijiang    | 3020 | 8.95  | 982.53  | 63.24 | 1077.65 | 1.10 | Terrestrial | Open site     | Non-endemic |
| <i>Habenaria davidii</i>    | Luquan     | 3190 | 6.58  | 965.09  | 73.60 | 1160.89 | 1.20 | Terrestrial | Shrubland     | Non-endemic |
| <i>Habenaria davidii</i>    | Weixi      | 3200 | 6.23  | 970.70  | 69.95 | 1021.03 | 1.05 | Terrestrial | Grassy slope  | Non-endemic |
| <i>Habenaria davidii</i>    | Dongchuan  | 3250 | 6.33  | 1021.73 | 71.65 | 1186.61 | 1.16 | Terrestrial | Shrubland     | Non-endemic |
| <i>Habenaria delavayi</i>   | Mengzi     | 1720 | 16.14 | 855.35  | 71.82 | 1434.56 | 1.68 | Terrestrial | Meadow        | Non-endemic |
| <i>Habenaria delavayi</i>   | Dali       | 2010 | 14.76 | 1082.70 | 68.61 | 1256.27 | 1.16 | Terrestrial | Grassy slope  | Non-endemic |
| <i>Habenaria delavayi</i>   | Binchuan   | 2100 | 14.10 | 573.87  | 62.93 | 1418.42 | 2.47 | Terrestrial | Meadow        | Non-endemic |
| <i>Habenaria delavayi</i>   | Kunming    | 2200 | 13.08 | 1019.14 | 72.30 | 1197.62 | 1.18 | Terrestrial | Dense forest  | Non-endemic |
| <i>Habenaria delavayi</i>   | Anning     | 2250 | 12.53 | 896.67  | 71.23 | 1167.91 | 1.30 | Terrestrial | Shrubland     | Non-endemic |
| <i>Habenaria delavayi</i>   | Eryuan     | 2280 | 12.85 | 745.16  | 68.27 | 1210.94 | 1.63 | Terrestrial | Sparse forest | Non-endemic |



|                           |           |      |       |         |       |         |      |             |               |             |
|---------------------------|-----------|------|-------|---------|-------|---------|------|-------------|---------------|-------------|
| <i>Habenaria delavayi</i> | Kunming   | 2300 | 12.48 | 1019.14 | 72.30 | 1197.62 | 1.18 | Terrestrial | Grassy slope  | Non-endemic |
| <i>Habenaria delavayi</i> | Eryuan    | 2360 | 12.37 | 745.16  | 68.27 | 1210.94 | 1.63 | Terrestrial | Dense forest  | Non-endemic |
| <i>Habenaria delavayi</i> | Kunming   | 2400 | 11.88 | 1019.14 | 72.30 | 1197.62 | 1.18 | Terrestrial | Grassy slope  | Non-endemic |
| <i>Habenaria delavayi</i> | Lijiang   | 2420 | 12.55 | 982.53  | 63.24 | 1077.65 | 1.10 | Terrestrial | Meadow        | Non-endemic |
| <i>Habenaria delavayi</i> | Lijiang   | 2500 | 12.07 | 982.53  | 63.24 | 1077.65 | 1.10 | Terrestrial | Shrubland     | Non-endemic |
| <i>Habenaria delavayi</i> | Lijiang   | 2600 | 11.47 | 982.53  | 63.24 | 1077.65 | 1.10 | Terrestrial | Meadow        | Non-endemic |
| <i>Habenaria delavayi</i> | Lijiang   | 2690 | 10.93 | 982.53  | 63.24 | 1077.65 | 1.10 | Terrestrial | Meadow        | Non-endemic |
| <i>Habenaria delavayi</i> | Zhongdian | 2800 | 8.64  | 641.73  | 69.05 | 914.89  | 1.43 | Terrestrial | Dense forest  | Non-endemic |
| <i>Habenaria delavayi</i> | Lijiang   | 2800 | 10.27 | 982.53  | 63.24 | 1077.65 | 1.10 | Terrestrial | Grassy slope  | Non-endemic |
| <i>Habenaria delavayi</i> | Eryuan    | 2900 | 9.13  | 745.16  | 68.27 | 1210.94 | 1.63 | Terrestrial | Dense forest  | Non-endemic |
| <i>Habenaria delavayi</i> | Lijiang   | 3080 | 8.59  | 982.53  | 63.24 | 1077.65 | 1.10 | Terrestrial | Meadow        | Non-endemic |
| <i>Habenaria delavayi</i> | Lijiang   | 3100 | 8.47  | 982.53  | 63.24 | 1077.65 | 1.10 | Terrestrial | Grassy slope  | Non-endemic |
| <i>Habenaria dentata</i>  | Funing    | 250  | 22.12 | 1161.58 | 79.07 | 1147.17 | 0.99 | Terrestrial | Grassy slope  | Non-endemic |
| <i>Habenaria dentata</i>  | Yuanjiang | 800  | 21.38 | 805.59  | 69.08 | 1652.32 | 2.05 | Terrestrial | Shrubland     | Non-endemic |
| <i>Habenaria dentata</i>  | Menghai   | 900  | 20.16 | 1314.38 | 80.83 | 1150.91 | 0.88 | Terrestrial | Dense forest  | Non-endemic |
| <i>Habenaria dentata</i>  | Cangyuan  | 1200 | 18.02 | 1733.34 | 81.63 | 1060.82 | 0.61 | Terrestrial | Dense forest  | Non-endemic |
| <i>Habenaria dentata</i>  | Yanshan   | 1200 | 18.26 | 1003.57 | 79.42 | 1172.21 | 1.17 | Terrestrial | Dense forest  | Non-endemic |
| <i>Habenaria dentata</i>  | Gongshan  | 1200 | 16.88 | 1738.42 | 78.47 | 860.43  | 0.50 | Terrestrial | Grassy slope  | Non-endemic |
| <i>Habenaria dentata</i>  | Pingbian  | 1250 | 17.32 | 1648.57 | 86.34 | 990.16  | 0.60 | Terrestrial | Grassy slope  | Non-endemic |
| <i>Habenaria dentata</i>  | Luchun    | 1300 | 18.90 | 2013.54 | 78.64 | 1151.56 | 0.57 | Terrestrial | Dense forest  | Non-endemic |
| <i>Habenaria dentata</i>  | Mengzi    | 1300 | 18.66 | 855.35  | 71.82 | 1434.56 | 1.68 | Terrestrial | Grassy slope  | Non-endemic |
| <i>Habenaria dentata</i>  | Mengzi    | 1300 | 18.66 | 855.35  | 71.82 | 1434.56 | 1.68 | Terrestrial | Shrubland     | Non-endemic |
| <i>Habenaria dentata</i>  | Mengla    | 1350 | 17.10 | 1514.70 | 84.25 | 1146.68 | 0.76 | Terrestrial | Dense forest  | Non-endemic |
| <i>Habenaria dentata</i>  | Jingdong  | 1460 | 16.82 | 1128.40 | 76.80 | 1142.11 | 1.01 | Terrestrial | Shrubland     | Non-endemic |
| <i>Habenaria dentata</i>  | Fugong    | 1500 | 15.06 | 1441.43 | 79.99 | 906.18  | 0.63 | Terrestrial | Open site     | Non-endemic |
| <i>Habenaria dentata</i>  | Jingdong  | 1520 | 16.46 | 1128.40 | 76.80 | 1142.11 | 1.01 | Terrestrial | Dense forest  | Non-endemic |
| <i>Habenaria dentata</i>  | Jingdong  | 1550 | 16.28 | 1128.40 | 76.80 | 1142.11 | 1.01 | Terrestrial | Sparse forest | Non-endemic |
| <i>Habenaria dentata</i>  | Fengqing  | 1600 | 16.60 | 1352.80 | 73.24 | 1172.52 | 0.87 | Terrestrial | Grassy slope  | Non-endemic |
| <i>Habenaria dentata</i>  | Shuangbai | 1660 | 16.92 | 942.53  | 72.21 | 1300.52 | 1.38 | Terrestrial | Dense forest  | Non-endemic |
| <i>Habenaria dentata</i>  | Gongshan  | 1700 | 13.88 | 1738.42 | 78.47 | 860.43  | 0.50 | Terrestrial | Dense forest  | Non-endemic |
| <i>Habenaria dentata</i>  | Jingdong  | 1700 | 15.38 | 1128.40 | 76.80 | 1142.11 | 1.01 | Terrestrial | Grassy slope  | Non-endemic |
| <i>Habenaria dentata</i>  | Gongshan  | 1700 | 13.88 | 1738.42 | 78.47 | 860.43  | 0.50 | Terrestrial | Grassy slope  | Non-endemic |
| <i>Habenaria dentata</i>  | Fugong    | 1700 | 13.86 | 1441.43 | 79.99 | 906.18  | 0.63 | Terrestrial | Open site     | Non-endemic |
| <i>Habenaria dentata</i>  | Longchuan | 1700 | 14.35 | 1604.50 | 80.46 | 1149.57 | 0.72 | Terrestrial | Open site     | Non-endemic |
| <i>Habenaria dentata</i>  | Tengchong | 1740 | 14.56 | 1501.45 | 78.06 | 857.93  | 0.57 | Terrestrial | Grassy slope  | Non-endemic |
| <i>Habenaria dentata</i>  | Eshan     | 1890 | 13.87 | 938.39  | 78.62 | 1123.48 | 1.20 | Terrestrial | Grassy slope  | Non-endemic |

|                              |           |      |       |         |       |         |      |             |               |             |
|------------------------------|-----------|------|-------|---------|-------|---------|------|-------------|---------------|-------------|
| <i>Habenaria dentata</i>     | Kunming   | 1900 | 14.88 | 1019.14 | 72.30 | 1197.62 | 1.18 | Terrestrial | Shrubland     | Non-endemic |
| <i>Habenaria dentata</i>     | Eryuan    | 2100 | 13.93 | 745.16  | 68.27 | 1210.94 | 1.63 | Terrestrial | Grassy slope  | Non-endemic |
| <i>Habenaria dentata</i>     | Kunming   | 2130 | 13.50 | 1019.14 | 72.30 | 1197.62 | 1.18 | Terrestrial | Grassy slope  | Non-endemic |
| <i>Habenaria dentata</i>     | Kunming   | 2200 | 13.08 | 1019.14 | 72.30 | 1197.62 | 1.18 | Terrestrial | Open site     | Non-endemic |
| <i>Habenaria dentata</i>     | Gongshan  | 2300 | 10.28 | 1738.42 | 78.47 | 860.43  | 0.50 | Terrestrial | Grassy slope  | Non-endemic |
| <i>Habenaria diceras</i>     | Deqin     | 3310 | 5.31  | 639.48  | 70.85 | 896.66  | 1.40 | Terrestrial | Shrubland     | Non-endemic |
| <i>Habenaria diphylla</i>    | Menghai   | 1300 | 17.76 | 1314.38 | 80.83 | 1150.91 | 0.88 | Terrestrial | Dense forest  | Non-endemic |
| <i>Habenaria diplonema</i>   | Lijiang   | 2800 | 10.27 | 982.53  | 63.24 | 1077.65 | 1.10 | Terrestrial | Dense forest  | Endemic     |
| <i>Habenaria finetiana</i>   | Kunming   | 1900 | 14.88 | 1019.14 | 72.30 | 1197.62 | 1.18 | Terrestrial | Shrubland     | Non-endemic |
| <i>Habenaria finetiana</i>   | Lincang   | 2000 | 14.52 | 1165.84 | 72.08 | 1167.73 | 1.00 | Terrestrial | Dense forest  | Non-endemic |
| <i>Habenaria finetiana</i>   | Eryuan    | 2100 | 13.93 | 745.16  | 68.27 | 1210.94 | 1.63 | Terrestrial | Grassy slope  | Non-endemic |
| <i>Habenaria finetiana</i>   | Heqing    | 2200 | 13.59 | 977.00  | 65.16 | 1211.84 | 1.24 | Terrestrial | Grassy slope  | Non-endemic |
| <i>Habenaria finetiana</i>   | Anning    | 2200 | 12.83 | 896.67  | 71.23 | 1167.91 | 1.30 | Terrestrial | Shrubland     | Non-endemic |
| <i>Habenaria finetiana</i>   | Lijiang   | 2400 | 12.67 | 982.53  | 63.24 | 1077.65 | 1.10 | Terrestrial | Open site     | Non-endemic |
| <i>Habenaria finetiana</i>   | Zhongdian | 2500 | 10.44 | 641.73  | 69.05 | 914.89  | 1.43 | Terrestrial | Grassy slope  | Non-endemic |
| <i>Habenaria finetiana</i>   | Zhongdian | 2500 | 10.44 | 641.73  | 69.05 | 914.89  | 1.43 | Terrestrial | Grassy slope  | Non-endemic |
| <i>Habenaria fordii</i>      | Mengla    | 900  | 19.80 | 1514.70 | 84.25 | 1146.68 | 0.76 | Terrestrial | Dense forest  | Non-endemic |
| <i>Habenaria fordii</i>      | Yongde    | 1300 | 19.33 | 1266.25 | 69.00 | 1283.63 | 1.01 | Terrestrial | Dense forest  | Non-endemic |
| <i>Habenaria furcifera</i>   | Yongde    | 1000 | 21.13 | 1266.25 | 69.00 | 1283.63 | 1.01 | Terrestrial | Grassy slope  | Non-endemic |
| <i>Habenaria glaucifolia</i> | Lijiang   | 2600 | 11.47 | 982.53  | 63.24 | 1077.65 | 1.10 | Terrestrial | Meadow        | Non-endemic |
| <i>Habenaria glaucifolia</i> | Zhongdian | 2800 | 8.64  | 641.73  | 69.05 | 914.89  | 1.43 | Terrestrial | Grassy slope  | Non-endemic |
| <i>Habenaria glaucifolia</i> | Lijiang   | 2800 | 10.27 | 982.53  | 63.24 | 1077.65 | 1.10 | Terrestrial | Meadow        | Non-endemic |
| <i>Habenaria glaucifolia</i> | Eryuan    | 2900 | 9.13  | 745.16  | 68.27 | 1210.94 | 1.63 | Terrestrial | Sparse forest | Non-endemic |
| <i>Habenaria glaucifolia</i> | Lijiang   | 2950 | 9.37  | 982.53  | 63.24 | 1077.65 | 1.10 | Terrestrial | Shrubland     | Non-endemic |
| <i>Habenaria glaucifolia</i> | Weixi     | 3000 | 7.43  | 970.70  | 69.95 | 1021.03 | 1.05 | Terrestrial | Dense forest  | Non-endemic |
| <i>Habenaria glaucifolia</i> | Eryuan    | 3000 | 8.53  | 745.16  | 68.27 | 1210.94 | 1.63 | Terrestrial | Forest edge   | Non-endemic |
| <i>Habenaria glaucifolia</i> | Zhongdian | 3050 | 7.14  | 641.73  | 69.05 | 914.89  | 1.43 | Terrestrial | Grassy slope  | Non-endemic |
| <i>Habenaria glaucifolia</i> | Lijiang   | 3070 | 8.65  | 982.53  | 63.24 | 1077.65 | 1.10 | Terrestrial | Meadow        | Non-endemic |
| <i>Habenaria glaucifolia</i> | Zhongdian | 3100 | 6.84  | 641.73  | 69.05 | 914.89  | 1.43 | Terrestrial | Meadow        | Non-endemic |
| <i>Habenaria glaucifolia</i> | Lijiang   | 3100 | 8.47  | 982.53  | 63.24 | 1077.65 | 1.10 | Terrestrial | Meadow        | Non-endemic |
| <i>Habenaria glaucifolia</i> | Zhongdian | 3100 | 6.84  | 641.73  | 69.05 | 914.89  | 1.43 | Terrestrial | Shrubland     | Non-endemic |
| <i>Habenaria glaucifolia</i> | Weixi     | 3200 | 6.23  | 970.70  | 69.95 | 1021.03 | 1.05 | Terrestrial | Grassy slope  | Non-endemic |
| <i>Habenaria glaucifolia</i> | Zhongdian | 3260 | 5.88  | 641.73  | 69.05 | 914.89  | 1.43 | Terrestrial | Meadow        | Non-endemic |
| <i>Habenaria glaucifolia</i> | Zhongdian | 3300 | 5.64  | 641.73  | 69.05 | 914.89  | 1.43 | Terrestrial | Meadow        | Non-endemic |
| <i>Habenaria glaucifolia</i> | Zhongdian | 3300 | 5.64  | 641.73  | 69.05 | 914.89  | 1.43 | Terrestrial | Shrubland     | Non-endemic |
| <i>Habenaria glaucifolia</i> | Deqin     | 3320 | 5.25  | 639.48  | 70.85 | 896.66  | 1.40 | Terrestrial | Meadow        | Non-endemic |

|                              |            |      |       |         |       |         |      |             |               |             |
|------------------------------|------------|------|-------|---------|-------|---------|------|-------------|---------------|-------------|
| <i>Habenaria glaucifolia</i> | Zhongdian  | 3600 | 3.84  | 641.73  | 69.05 | 914.89  | 1.43 | Terrestrial | Meadow        | Non-endemic |
| <i>Habenaria glaucifolia</i> | Zhongdian  | 3900 | 2.04  | 641.73  | 69.05 | 914.89  | 1.43 | Terrestrial | Dense forest  | Non-endemic |
| <i>Habenaria intermedia</i>  | Zhongdian  | 3000 | 7.44  | 641.73  | 69.05 | 914.89  | 1.43 | Terrestrial | Sparse forest | Non-endemic |
| <i>Habenaria limprichtii</i> | Heqing     | 1700 | 16.59 | 977.00  | 65.16 | 1211.84 | 1.24 | Terrestrial | Grassy slope  | Non-endemic |
| <i>Habenaria limprichtii</i> | Kunming    | 1900 | 14.88 | 1019.14 | 72.30 | 1197.62 | 1.18 | Terrestrial | Shrubland     | Non-endemic |
| <i>Habenaria limprichtii</i> | Kunming    | 1900 | 14.88 | 1019.14 | 72.30 | 1197.62 | 1.18 | Terrestrial | Shrubland     | Non-endemic |
| <i>Habenaria limprichtii</i> | Zhaotong   | 1920 | 11.80 | 708.66  | 74.85 | 1046.05 | 1.48 | Terrestrial | Grassy slope  | Non-endemic |
| <i>Habenaria limprichtii</i> | Jiangchuan | 1950 | 14.30 | 872.74  | 74.72 | 1181.99 | 1.35 | Terrestrial | Dense forest  | Non-endemic |
| <i>Habenaria limprichtii</i> | Jingdong   | 2100 | 12.98 | 1128.40 | 76.80 | 1142.11 | 1.01 | Terrestrial | Dense forest  | Non-endemic |
| <i>Habenaria limprichtii</i> | Kunming    | 2100 | 13.68 | 1019.14 | 72.30 | 1197.62 | 1.18 | Terrestrial | Grassy slope  | Non-endemic |
| <i>Habenaria limprichtii</i> | Kunming    | 2300 | 12.48 | 1019.14 | 72.30 | 1197.62 | 1.18 | Terrestrial | Grassy slope  | Non-endemic |
| <i>Habenaria limprichtii</i> | Kunming    | 2310 | 12.42 | 1019.14 | 72.30 | 1197.62 | 1.18 | Terrestrial | Grassy slope  | Non-endemic |
| <i>Habenaria limprichtii</i> | Dali       | 2350 | 12.72 | 1082.70 | 68.61 | 1256.27 | 1.16 | Terrestrial | Shrubland     | Non-endemic |
| <i>Habenaria limprichtii</i> | Songming   | 2350 | 11.49 | 1010.18 | 74.14 | 1134.24 | 1.12 | Terrestrial | Shrubland     | Non-endemic |
| <i>Habenaria limprichtii</i> | Kunming    | 2380 | 12.00 | 1019.14 | 72.30 | 1197.62 | 1.18 | Terrestrial | Grassy slope  | Non-endemic |
| <i>Habenaria limprichtii</i> | Dali       | 2420 | 12.30 | 1082.70 | 68.61 | 1256.27 | 1.16 | Terrestrial | Dense forest  | Non-endemic |
| <i>Habenaria limprichtii</i> | Dali       | 2500 | 11.82 | 1082.70 | 68.61 | 1256.27 | 1.16 | Terrestrial | Meadow        | Non-endemic |
| <i>Habenaria limprichtii</i> | Wuding     | 2600 | 9.79  | 988.68  | 74.74 | 1188.19 | 1.20 | Terrestrial | Grassy slope  | Non-endemic |
| <i>Habenaria limprichtii</i> | Lijiang    | 2650 | 11.17 | 982.53  | 63.24 | 1077.65 | 1.10 | Terrestrial | Grassy slope  | Non-endemic |
| <i>Habenaria limprichtii</i> | Lijiang    | 2650 | 11.17 | 982.53  | 63.24 | 1077.65 | 1.10 | Terrestrial | Meadow        | Non-endemic |
| <i>Habenaria limprichtii</i> | Lijiang    | 2730 | 10.69 | 982.53  | 63.24 | 1077.65 | 1.10 | Terrestrial | Meadow        | Non-endemic |
| <i>Habenaria limprichtii</i> | Lijiang    | 2750 | 10.57 | 982.53  | 63.24 | 1077.65 | 1.10 | Terrestrial | Meadow        | Non-endemic |
| <i>Habenaria limprichtii</i> | Zhongdian  | 2900 | 8.04  | 641.73  | 69.05 | 914.89  | 1.43 | Terrestrial | Meadow        | Non-endemic |
| <i>Habenaria limprichtii</i> | Yangbi     | 3000 | 7.99  | 1044.23 | 72.19 | 1161.15 | 1.11 | Terrestrial | Grassy slope  | Non-endemic |
| <i>Habenaria limprichtii</i> | Lijiang    | 3000 | 9.07  | 982.53  | 63.24 | 1077.65 | 1.10 | Terrestrial | Grassy slope  | Non-endemic |
| <i>Habenaria limprichtii</i> | Lijiang    | 3000 | 9.07  | 982.53  | 63.24 | 1077.65 | 1.10 | Terrestrial | Shrubland     | Non-endemic |
| <i>Habenaria limprichtii</i> | Lijiang    | 3020 | 8.95  | 982.53  | 63.24 | 1077.65 | 1.10 | Terrestrial | Open site     | Non-endemic |
| <i>Habenaria limprichtii</i> | Lijiang    | 3200 | 7.87  | 982.53  | 63.24 | 1077.65 | 1.10 | Terrestrial | Grassy slope  | Non-endemic |
| <i>Habenaria limprichtii</i> | Lijiang    | 3430 | 6.49  | 982.53  | 63.24 | 1077.65 | 1.10 | Terrestrial | Shrubland     | Non-endemic |
| <i>Habenaria linguella</i>   | Tonghai    | 1400 | 18.21 | 891.56  | 72.93 | 1238.30 | 1.39 | Terrestrial | Open site     | Non-endemic |
| <i>Habenaria linguella</i>   | Menghai    | 1450 | 16.86 | 1314.38 | 80.83 | 1150.91 | 0.88 | Terrestrial | Dense forest  | Non-endemic |
| <i>Habenaria linguella</i>   | Menglian   | 1600 | 15.98 | 1357.68 | 80.47 | 1185.94 | 0.87 | Terrestrial | Meadow        | Non-endemic |
| <i>Habenaria linguella</i>   | Menghai    | 1800 | 14.76 | 1314.38 | 80.83 | 1150.91 | 0.88 | Terrestrial | Meadow        | Non-endemic |
| <i>Habenaria linguella</i>   | Heqing     | 2590 | 11.25 | 977.00  | 65.16 | 1211.84 | 1.24 | Terrestrial | Meadow        | Non-endemic |
| <i>Habenaria lucida</i>      | Jinghong   | 150  | 24.82 | 1161.08 | 80.46 | 1256.19 | 1.08 | Terrestrial | Dense forest  | Non-endemic |
| <i>Habenaria lucida</i>      | Mengla     | 850  | 20.10 | 1514.70 | 84.25 | 1146.68 | 0.76 | Terrestrial | Dense forest  | Non-endemic |

|                               |           |      |       |         |       |         |      |             |              |             |
|-------------------------------|-----------|------|-------|---------|-------|---------|------|-------------|--------------|-------------|
| <i>Habenaria lucida</i>       | Jinghong  | 900  | 20.32 | 1161.08 | 80.46 | 1256.19 | 1.08 | Terrestrial | Shrubland    | Non-endemic |
| <i>Habenaria lucida</i>       | Jinghong  | 1000 | 19.72 | 1161.08 | 80.46 | 1256.19 | 1.08 | Terrestrial | Dense forest | Non-endemic |
| <i>Habenaria lucida</i>       | Jinghong  | 1000 | 19.72 | 1161.08 | 80.46 | 1256.19 | 1.08 | Terrestrial | Dense forest | Non-endemic |
| <i>Habenaria lucida</i>       | Jinghong  | 1100 | 19.12 | 1161.08 | 80.46 | 1256.19 | 1.08 | Terrestrial | Dense forest | Non-endemic |
| <i>Habenaria mairei</i>       | Zhongdian | 3100 | 6.84  | 641.73  | 69.05 | 914.89  | 1.43 | Terrestrial | Meadow       | Non-endemic |
| <i>Habenaria mairei</i>       | Zhongdian | 3350 | 5.34  | 641.73  | 69.05 | 914.89  | 1.43 | Terrestrial | Meadow       | Non-endemic |
| <i>Habenaria mairei</i>       | Zhongdian | 3500 | 4.44  | 641.73  | 69.05 | 914.89  | 1.43 | Terrestrial | Grassy slope | Non-endemic |
| <i>Habenaria malintana</i>    | Mengla    | 560  | 21.84 | 1514.70 | 84.25 | 1146.68 | 0.76 | Terrestrial | Open site    | Non-endemic |
| <i>Habenaria malintana</i>    | Mengla    | 800  | 20.40 | 1514.70 | 84.25 | 1146.68 | 0.76 | Terrestrial | Shrubland    | Non-endemic |
| <i>Habenaria malintana</i>    | Mengla    | 850  | 20.10 | 1514.70 | 84.25 | 1146.68 | 0.76 | Terrestrial | Dense forest | Non-endemic |
| <i>Habenaria malintana</i>    | Mengla    | 900  | 19.80 | 1514.70 | 84.25 | 1146.68 | 0.76 | Terrestrial | Dense forest | Non-endemic |
| <i>Habenaria malintana</i>    | Mengla    | 1040 | 18.96 | 1514.70 | 84.25 | 1146.68 | 0.76 | Terrestrial | Grassy slope | Non-endemic |
| <i>Habenaria malintana</i>    | Tengchong | 1320 | 17.08 | 1501.45 | 78.06 | 857.93  | 0.57 | Terrestrial | Dense forest | Non-endemic |
| <i>Habenaria malintana</i>    | Tengchong | 1320 | 17.08 | 1501.45 | 78.06 | 857.93  | 0.57 | Terrestrial | Dense forest | Non-endemic |
| <i>Habenaria marginata</i>    | Mengla    | 500  | 22.20 | 1514.70 | 84.25 | 1146.68 | 0.76 | Terrestrial | Grassy slope | Non-endemic |
| <i>Habenaria marginata</i>    | Jinghong  | 800  | 20.92 | 1161.08 | 80.46 | 1256.19 | 1.08 | Terrestrial | Meadow       | Non-endemic |
| <i>Habenaria marginata</i>    | Jinghong  | 950  | 20.02 | 1161.08 | 80.46 | 1256.19 | 1.08 | Terrestrial | Dense forest | Non-endemic |
| <i>Habenaria marginata</i>    | Jinghong  | 1000 | 19.72 | 1161.08 | 80.46 | 1256.19 | 1.08 | Terrestrial | Open site    | Non-endemic |
| <i>Habenaria marginata</i>    | Mengla    | 1040 | 18.96 | 1514.70 | 84.25 | 1146.68 | 0.76 | Terrestrial | Grassy slope | Non-endemic |
| <i>Habenaria marginata</i>    | Mengla    | 1200 | 18.00 | 1514.70 | 84.25 | 1146.68 | 0.76 | Terrestrial | Open site    | Non-endemic |
| <i>Habenaria medioflexa</i>   | Mengla    | 700  | 21.00 | 1514.70 | 84.25 | 1146.68 | 0.76 | Terrestrial | Dense forest | Non-endemic |
| <i>Habenaria medioflexa</i>   | Mengla    | 800  | 20.40 | 1514.70 | 84.25 | 1146.68 | 0.76 | Terrestrial | Dense forest | Non-endemic |
| <i>Habenaria nematocera</i>   | Mengla    | 1000 | 19.20 | 1514.70 | 84.25 | 1146.68 | 0.76 | Terrestrial | Dense forest | Endemic     |
| <i>Habenaria petelotii</i>    | Xichou    | 1500 | 15.93 | 1267.54 | 82.98 | 985.97  | 0.78 | Terrestrial | Dense forest | Non-endemic |
| <i>Habenaria petelotii</i>    | Malipo    | 1600 | 14.66 | 1063.54 | 85.83 | 1053.97 | 0.99 | Terrestrial | Dense forest | Non-endemic |
| <i>Habenaria plurifoliata</i> | Jinghong  | 800  | 20.92 | 1161.08 | 80.46 | 1256.19 | 1.08 | Terrestrial | Dense forest | Non-endemic |
| <i>Habenaria remiformis</i>   | Yuliang   | 1960 | 13.76 | 905.45  | 75.03 | 1218.48 | 1.35 | Terrestrial | Dense forest | Non-endemic |
| <i>Habenaria rostellifera</i> | Yuliang   | 1800 | 14.72 | 905.45  | 75.03 | 1218.48 | 1.35 | Terrestrial | Grassy slope | Non-endemic |
| <i>Habenaria rostellifera</i> | Kunming   | 1900 | 14.88 | 1019.14 | 72.30 | 1197.62 | 1.18 | Terrestrial | Grassy slope | Non-endemic |
| <i>Habenaria rostellifera</i> | Kunming   | 2000 | 14.28 | 1019.14 | 72.30 | 1197.62 | 1.18 | Terrestrial | Open site    | Non-endemic |
| <i>Habenaria rostellifera</i> | Kunming   | 2050 | 13.98 | 1019.14 | 72.30 | 1197.62 | 1.18 | Terrestrial | Grassy slope | Non-endemic |
| <i>Habenaria rostellifera</i> | Kunming   | 2100 | 13.68 | 1019.14 | 72.30 | 1197.62 | 1.18 | Terrestrial | Grassy slope | Non-endemic |
| <i>Habenaria rostellifera</i> | Dali      | 2170 | 13.80 | 1082.70 | 68.61 | 1256.27 | 1.16 | Terrestrial | Grassy slope | Non-endemic |
| <i>Habenaria rostellifera</i> | Songming  | 2200 | 12.39 | 1010.18 | 74.14 | 1134.24 | 1.12 | Terrestrial | Dense forest | Non-endemic |
| <i>Habenaria rostellifera</i> | Kunming   | 2200 | 13.08 | 1019.14 | 72.30 | 1197.62 | 1.18 | Terrestrial | Open site    | Non-endemic |
| <i>Habenaria rostellifera</i> | Kunming   | 2300 | 12.48 | 1019.14 | 72.30 | 1197.62 | 1.18 | Terrestrial | Dense forest | Non-endemic |

|                               |            |      |       |         |       |         |      |             |               |             |
|-------------------------------|------------|------|-------|---------|-------|---------|------|-------------|---------------|-------------|
| <i>Habenaria rostellifera</i> | Kunming    | 2380 | 12.00 | 1019.14 | 72.30 | 1197.62 | 1.18 | Terrestrial | Grassy slope  | Non-endemic |
| <i>Habenaria schindleri</i>   | Jingdong   | 2120 | 12.86 | 1128.40 | 76.80 | 1142.11 | 1.01 | Terrestrial | Dense forest  | Non-endemic |
| <i>Habenaria szechuanica</i>  | Lijiang    | 2900 | 9.67  | 982.53  | 63.24 | 1077.65 | 1.10 | Terrestrial | Dense forest  | Non-endemic |
| <i>Habenaria tonkinensis</i>  | Jinghong   | 840  | 20.68 | 1161.08 | 80.46 | 1256.19 | 1.08 | Terrestrial | Dense forest  | Non-endemic |
| <i>Habenaria yuana</i>        | Jinghong   | 1800 | 14.92 | 1161.08 | 80.46 | 1256.19 | 1.08 | Terrestrial | Grassy slope  | Non-endemic |
| <i>Hancockia uniflora</i>     | Xichou     | 1300 | 17.13 | 1267.54 | 82.98 | 985.97  | 0.78 | Terrestrial | Dense forest  | Non-endemic |
| <i>Hancockia uniflora</i>     | Pingbian   | 1560 | 15.46 | 1648.57 | 86.34 | 990.16  | 0.60 | Terrestrial | Sparse forest | Non-endemic |
| <i>Hancockia uniflora</i>     | Pingbian   | 1650 | 14.92 | 1648.57 | 86.34 | 990.16  | 0.60 | Terrestrial | Dense forest  | Non-endemic |
| <i>Hemipilia cruciata</i>     | Jianchuan  | 2200 | 12.35 | 753.13  | 70.16 | 1154.48 | 1.53 | Terrestrial | Grassy slope  | Non-endemic |
| <i>Hemipilia cruciata</i>     | Yaoan      | 2400 | 12.14 | 784.85  | 68.90 | 1295.94 | 1.65 | Terrestrial | Shrubland     | Non-endemic |
| <i>Hemipilia cruciata</i>     | Lijiang    | 2700 | 10.87 | 982.53  | 63.24 | 1077.65 | 1.10 | Terrestrial | Grassy slope  | Non-endemic |
| <i>Hemipilia flabellata</i>   | Jiangchuan | 1760 | 15.44 | 872.74  | 74.72 | 1181.99 | 1.35 | Terrestrial | Dense forest  | Non-endemic |
| <i>Hemipilia flabellata</i>   | Jiangchuan | 1780 | 15.32 | 872.74  | 74.72 | 1181.99 | 1.35 | Terrestrial | Dense forest  | Non-endemic |
| <i>Hemipilia flabellata</i>   | Tonghai    | 1850 | 15.51 | 891.56  | 72.93 | 1238.30 | 1.39 | Terrestrial | Dense forest  | Non-endemic |
| <i>Hemipilia flabellata</i>   | Anning     | 1860 | 14.87 | 896.67  | 71.23 | 1167.91 | 1.30 | Terrestrial | Dense forest  | Non-endemic |
| <i>Hemipilia flabellata</i>   | Dali       | 2040 | 14.58 | 1082.70 | 68.61 | 1256.27 | 1.16 | Terrestrial | Shrubland     | Non-endemic |
| <i>Hemipilia flabellata</i>   | Yangbi     | 2100 | 13.39 | 1044.23 | 72.19 | 1161.15 | 1.11 | Terrestrial | Grassy slope  | Non-endemic |
| <i>Hemipilia flabellata</i>   | Eryuan     | 2120 | 13.81 | 745.16  | 68.27 | 1210.94 | 1.63 | Terrestrial | Shrubland     | Non-endemic |
| <i>Hemipilia flabellata</i>   | Lijiang    | 2200 | 13.87 | 982.53  | 63.24 | 1077.65 | 1.10 | Terrestrial | Dense forest  | Non-endemic |
| <i>Hemipilia flabellata</i>   | Zhongdian  | 2200 | 12.24 | 641.73  | 69.05 | 914.89  | 1.43 | Terrestrial | Dense forest  | Non-endemic |
| <i>Hemipilia flabellata</i>   | Kunming    | 2200 | 13.08 | 1019.14 | 72.30 | 1197.62 | 1.18 | Terrestrial | Open site     | Non-endemic |
| <i>Hemipilia flabellata</i>   | Dali       | 2230 | 13.44 | 1082.70 | 68.61 | 1256.27 | 1.16 | Terrestrial | Shrubland     | Non-endemic |
| <i>Hemipilia flabellata</i>   | Binchuan   | 2300 | 12.90 | 573.87  | 62.93 | 1418.42 | 2.47 | Terrestrial | Dense forest  | Non-endemic |
| <i>Hemipilia flabellata</i>   | Longling   | 2400 | 9.72  | 2098.66 | 84.65 | 973.45  | 0.46 | Terrestrial | Dense forest  | Non-endemic |
| <i>Hemipilia flabellata</i>   | Wuding     | 2400 | 10.99 | 988.68  | 74.74 | 1188.19 | 1.20 | Terrestrial | Dense forest  | Non-endemic |
| <i>Hemipilia flabellata</i>   | Lijiang    | 2400 | 12.67 | 982.53  | 63.24 | 1077.65 | 1.10 | Terrestrial | Dense forest  | Non-endemic |
| <i>Hemipilia flabellata</i>   | Heqing     | 2480 | 11.91 | 977.00  | 65.16 | 1211.84 | 1.24 | Terrestrial | Shrubland     | Non-endemic |
| <i>Hemipilia flabellata</i>   | Weixi      | 2500 | 10.43 | 970.70  | 69.95 | 1021.03 | 1.05 | Terrestrial | Dense forest  | Non-endemic |
| <i>Hemipilia flabellata</i>   | Heqing     | 2500 | 11.79 | 977.00  | 65.16 | 1211.84 | 1.24 | Terrestrial | Dense forest  | Non-endemic |
| <i>Hemipilia flabellata</i>   | Lijiang    | 2500 | 12.07 | 982.53  | 63.24 | 1077.65 | 1.10 | Terrestrial | Shrubland     | Non-endemic |
| <i>Hemipilia flabellata</i>   | Gongshan   | 2700 | 7.88  | 1738.42 | 78.47 | 860.43  | 0.50 | Terrestrial | Dense forest  | Non-endemic |
| <i>Hemipilia flabellata</i>   | Zhongdian  | 2700 | 9.24  | 641.73  | 69.05 | 914.89  | 1.43 | Terrestrial | Shrubland     | Non-endemic |
| <i>Hemipilia flabellata</i>   | Zhongdian  | 2800 | 8.64  | 641.73  | 69.05 | 914.89  | 1.43 | Terrestrial | Dense forest  | Non-endemic |
| <i>Hemipilia flabellata</i>   | Zhongdian  | 2900 | 8.04  | 641.73  | 69.05 | 914.89  | 1.43 | Terrestrial | Dense forest  | Non-endemic |
| <i>Hemipilia flabellata</i>   | Zhongdian  | 3900 | 2.04  | 641.73  | 69.05 | 914.89  | 1.43 | Terrestrial | Dense forest  | Non-endemic |
| <i>Hemipilia forrestii</i>    | Lijiang    | 2250 | 13.57 | 982.53  | 63.24 | 1077.65 | 1.10 | Terrestrial | Dense forest  | Non-endemic |

|                                  |           |      |       |         |       |         |      |             |              |             |
|----------------------------------|-----------|------|-------|---------|-------|---------|------|-------------|--------------|-------------|
| <i>Hemipilia kwangsiensis</i>    | Yongde    | 2300 | 13.33 | 1266.25 | 69.00 | 1283.63 | 1.01 | Terrestrial | Dense forest | Non-endemic |
| <i>Hemipilia limprichtii</i>     | Chuxiong  | 1500 | 17.57 | 874.28  | 69.99 | 1192.36 | 1.36 | Terrestrial | Shrubland    | Non-endemic |
| <i>Hemipilia limprichtii</i>     | Dali      | 2050 | 14.52 | 1082.70 | 68.61 | 1256.27 | 1.16 | Terrestrial | Shrubland    | Non-endemic |
| <i>Hemipilia limprichtii</i>     | Fuyuan    | 2500 | 9.87  | 1084.02 | 74.80 | 1096.10 | 1.01 | Terrestrial | Shrubland    | Non-endemic |
| <i>Hemipilia quinquangularis</i> | Weixi     | 1600 | 15.83 | 970.70  | 69.95 | 1021.03 | 1.05 | Terrestrial | Dense forest | Non-endemic |
| <i>Hemipilia quinquangularis</i> | Deqin     | 1950 | 13.47 | 639.48  | 70.85 | 896.66  | 1.40 | Terrestrial | Grassy slope | Non-endemic |
| <i>Hemipilia quinquangularis</i> | Weixi     | 2300 | 11.63 | 970.70  | 69.95 | 1021.03 | 1.05 | Terrestrial | Dense forest | Non-endemic |
| <i>Hemipilia quinquangularis</i> | Gongshan  | 2500 | 9.08  | 1738.42 | 78.47 | 860.43  | 0.50 | Terrestrial | Shrubland    | Non-endemic |
| <i>Hemipilia quinquangularis</i> | Lijiang   | 2650 | 11.17 | 982.53  | 63.24 | 1077.65 | 1.10 | Terrestrial | Dense forest | Non-endemic |
| <i>Hemipilia quinquangularis</i> | Deqin     | 2900 | 7.77  | 639.48  | 70.85 | 896.66  | 1.40 | Terrestrial | Dense forest | Non-endemic |
| <i>Herminium alaschanicum</i>    | Lijiang   | 2800 | 10.27 | 982.53  | 63.24 | 1077.65 | 1.10 | Terrestrial | Grassy slope | Non-endemic |
| <i>Herminium alaschanicum</i>    | Yongde    | 1700 | 16.93 | 1266.25 | 69.00 | 1283.63 | 1.01 | Terrestrial | Dense forest | Non-endemic |
| <i>Herminium alaschanicum</i>    | Deqin     | 2700 | 8.97  | 639.48  | 70.85 | 896.66  | 1.40 | Terrestrial | Grassy slope | Non-endemic |
| <i>Herminium alaschanicum</i>    | Zhongdian | 2900 | 8.04  | 641.73  | 69.05 | 914.89  | 1.43 | Terrestrial | Grassy slope | Non-endemic |
| <i>Herminium alaschanicum</i>    | Zhongdian | 3300 | 5.64  | 641.73  | 69.05 | 914.89  | 1.43 | Terrestrial | Meadow       | Non-endemic |
| <i>Herminium alaschanicum</i>    | Zhongdian | 3380 | 5.16  | 641.73  | 69.05 | 914.89  | 1.43 | Terrestrial | Meadow       | Non-endemic |
| <i>Herminium angustilabre</i>    | Gongshan  | 3500 | 3.08  | 1738.42 | 78.47 | 860.43  | 0.50 | Terrestrial | Shrubland    | Non-endemic |
| <i>Herminium carnosilabre</i>    | Gongshan  | 3200 | 4.88  | 1738.42 | 78.47 | 860.43  | 0.50 | Terrestrial | Shrubland    | Endemic     |
| <i>Herminium chloranthum</i>     | Lijiang   | 2500 | 12.07 | 982.53  | 63.24 | 1077.65 | 1.10 | Terrestrial | Grassy slope | Non-endemic |
| <i>Herminium chloranthum</i>     | Lijiang   | 2800 | 10.27 | 982.53  | 63.24 | 1077.65 | 1.10 | Terrestrial | Grassy slope | Non-endemic |
| <i>Herminium chloranthum</i>     | Deqin     | 3400 | 4.77  | 639.48  | 70.85 | 896.66  | 1.40 | Terrestrial | Grassy slope | Non-endemic |
| <i>Herminium chloranthum</i>     | Lijiang   | 3550 | 5.77  | 982.53  | 63.24 | 1077.65 | 1.10 | Terrestrial | Dense forest | Non-endemic |
| <i>Herminium chloranthum</i>     | Weixi     | 3600 | 3.83  | 970.70  | 69.95 | 1021.03 | 1.05 | Terrestrial | Grassy slope | Non-endemic |
| <i>Herminium chloranthum</i>     | Zhongdian | 3800 | 2.64  | 641.73  | 69.05 | 914.89  | 1.43 | Terrestrial | Grassy slope | Non-endemic |
| <i>Herminium chloranthum</i>     | Deqin     | 4020 | 1.05  | 639.48  | 70.85 | 896.66  | 1.40 | Terrestrial | Grassy slope | Non-endemic |
| <i>Herminium chloranthum</i>     | Deqin     | 4100 | 0.57  | 639.48  | 70.85 | 896.66  | 1.40 | Terrestrial | Shrubland    | Non-endemic |
| <i>Herminium coiloglossum</i>    | Jingdong  | 1660 | 15.62 | 1128.40 | 76.80 | 1142.11 | 1.01 | Terrestrial | Dense forest | Non-endemic |
| <i>Herminium coiloglossum</i>    | Kunming   | 2300 | 12.48 | 1019.14 | 72.30 | 1197.62 | 1.18 | Terrestrial | Dense forest | Non-endemic |
| <i>Herminium coiloglossum</i>    | Yangbi    | 2900 | 8.59  | 1044.23 | 72.19 | 1161.15 | 1.11 | Terrestrial | Dense forest | Non-endemic |
| <i>Herminium coiloglossum</i>    | Zhaotong  | 3040 | 5.08  | 708.66  | 74.85 | 1046.05 | 1.48 | Terrestrial | Meadow       | Non-endemic |
| <i>Herminium ecalcaratum</i>     | Chuxiong  | 2200 | 13.37 | 874.28  | 69.99 | 1192.36 | 1.36 | Terrestrial | Dense forest | Non-endemic |
| <i>Herminium ecalcaratum</i>     | Yangbi    | 2500 | 10.99 | 1044.23 | 72.19 | 1161.15 | 1.11 | Terrestrial | Dense forest | Non-endemic |
| <i>Herminium ecalcaratum</i>     | Heqing    | 2600 | 11.19 | 977.00  | 65.16 | 1211.84 | 1.24 | Terrestrial | Grassy slope | Non-endemic |
| <i>Herminium glossophyllum</i>   | Lijiang   | 2760 | 10.51 | 982.53  | 63.24 | 1077.65 | 1.10 | Terrestrial | Grassy slope | Non-endemic |
| <i>Herminium glossophyllum</i>   | Zhongdian | 3000 | 7.44  | 641.73  | 69.05 | 914.89  | 1.43 | Terrestrial | Grassy slope | Non-endemic |
| <i>Herminium glossophyllum</i>   | Zhongdian | 3430 | 4.86  | 641.73  | 69.05 | 914.89  | 1.43 | Terrestrial | Dense forest | Non-endemic |

|                          |            |      |       |         |       |         |      |             |              |             |
|--------------------------|------------|------|-------|---------|-------|---------|------|-------------|--------------|-------------|
| <i>Herminium josephi</i> | Zhongdian  | 2800 | 8.64  | 641.73  | 69.05 | 914.89  | 1.43 | Terrestrial | Grassy slope | Non-endemic |
| <i>Herminium josephi</i> | Dongchuan  | 3000 | 7.83  | 1021.73 | 71.65 | 1186.61 | 1.16 | Terrestrial | Shrubland    | Non-endemic |
| <i>Herminium josephi</i> | Dongchuan  | 3100 | 7.23  | 1021.73 | 71.65 | 1186.61 | 1.16 | Terrestrial | Shrubland    | Non-endemic |
| <i>Herminium josephi</i> | Dayao      | 3120 | 8.21  | 810.80  | 65.01 | 1427.38 | 1.76 | Terrestrial | Meadow       | Non-endemic |
| <i>Herminium josephi</i> | Huize      | 3400 | 4.97  | 799.98  | 71.46 | 1179.17 | 1.47 | Terrestrial | Meadow       | Non-endemic |
| <i>Herminium josephi</i> | Lijiang    | 3700 | 4.87  | 982.53  | 63.24 | 1077.65 | 1.10 | Terrestrial | Meadow       | Non-endemic |
| <i>Herminium josephi</i> | Fugong     | 4000 | 0.06  | 1441.43 | 79.99 | 906.18  | 0.63 | Terrestrial | Meadow       | Non-endemic |
| <i>Herminium josephi</i> | Fugong     | 4000 | 0.06  | 1441.43 | 79.99 | 906.18  | 0.63 | Terrestrial | Meadow       | Non-endemic |
| <i>Herminium lanceum</i> | Yongde     | 1300 | 19.33 | 1266.25 | 69.00 | 1283.63 | 1.01 | Terrestrial | Dense forest | Non-endemic |
| <i>Herminium lanceum</i> | Gongshan   | 1600 | 14.48 | 1738.42 | 78.47 | 860.43  | 0.50 | Terrestrial | Dense forest | Non-endemic |
| <i>Herminium lanceum</i> | Jiangchuan | 1700 | 15.80 | 872.74  | 74.72 | 1181.99 | 1.35 | Terrestrial | Dense forest | Non-endemic |
| <i>Herminium lanceum</i> | Jiangchuan | 1750 | 15.50 | 872.74  | 74.72 | 1181.99 | 1.35 | Terrestrial | Dense forest | Non-endemic |
| <i>Herminium lanceum</i> | Lushui     | 1790 | 15.31 | 1195.57 | 70.63 | 911.65  | 0.76 | Terrestrial | Forest edge  | Non-endemic |
| <i>Herminium lanceum</i> | Fugong     | 1800 | 13.26 | 1441.43 | 79.99 | 906.18  | 0.63 | Terrestrial | Dense forest | Non-endemic |
| <i>Herminium lanceum</i> | Jinghong   | 1800 | 14.92 | 1161.08 | 80.46 | 1256.19 | 1.08 | Terrestrial | Grassy slope | Non-endemic |
| <i>Herminium lanceum</i> | Yuliang    | 1800 | 14.72 | 905.45  | 75.03 | 1218.48 | 1.35 | Terrestrial | Grassy slope | Non-endemic |
| <i>Herminium lanceum</i> | Deqin      | 1900 | 13.77 | 639.48  | 70.85 | 896.66  | 1.40 | Terrestrial | Grassy slope | Non-endemic |
| <i>Herminium lanceum</i> | Yangbi     | 1980 | 14.11 | 1044.23 | 72.19 | 1161.15 | 1.11 | Terrestrial | Grassy slope | Non-endemic |
| <i>Herminium lanceum</i> | Jingdong   | 2000 | 13.58 | 1128.40 | 76.80 | 1142.11 | 1.01 | Terrestrial | Forest edge  | Non-endemic |
| <i>Herminium lanceum</i> | Dayao      | 2000 | 14.93 | 810.80  | 65.01 | 1427.38 | 1.76 | Terrestrial | Shrubland    | Non-endemic |
| <i>Herminium lanceum</i> | Kunming    | 2030 | 14.10 | 1019.14 | 72.30 | 1197.62 | 1.18 | Terrestrial | Grassy slope | Non-endemic |
| <i>Herminium lanceum</i> | Songming   | 2100 | 12.99 | 1010.18 | 74.14 | 1134.24 | 1.12 | Terrestrial | Grassy slope | Non-endemic |
| <i>Herminium lanceum</i> | Jingdong   | 2120 | 12.86 | 1128.40 | 76.80 | 1142.11 | 1.01 | Terrestrial | Dense forest | Non-endemic |
| <i>Herminium lanceum</i> | Jingdong   | 2120 | 12.86 | 1128.40 | 76.80 | 1142.11 | 1.01 | Terrestrial | Dense forest | Non-endemic |
| <i>Herminium lanceum</i> | Kunming    | 2120 | 13.56 | 1019.14 | 72.30 | 1197.62 | 1.18 | Terrestrial | Grassy slope | Non-endemic |
| <i>Herminium lanceum</i> | Kunming    | 2200 | 13.08 | 1019.14 | 72.30 | 1197.62 | 1.18 | Terrestrial | Dense forest | Non-endemic |
| <i>Herminium lanceum</i> | Anning     | 2200 | 12.83 | 896.67  | 71.23 | 1167.91 | 1.30 | Terrestrial | Shrubland    | Non-endemic |
| <i>Herminium lanceum</i> | Songming   | 2200 | 12.39 | 1010.18 | 74.14 | 1134.24 | 1.12 | Terrestrial | Shrubland    | Non-endemic |
| <i>Herminium lanceum</i> | Eryuan     | 2230 | 13.15 | 745.16  | 68.27 | 1210.94 | 1.63 | Terrestrial | Dense forest | Non-endemic |
| <i>Herminium lanceum</i> | Zhenkang   | 2250 | 11.34 | 1602.96 | 81.14 | 1089.09 | 0.68 | Terrestrial | Grassy slope | Non-endemic |
| <i>Herminium lanceum</i> | Zhenkang   | 2250 | 11.34 | 1602.96 | 81.14 | 1089.09 | 0.68 | Terrestrial | Grassy slope | Non-endemic |
| <i>Herminium lanceum</i> | Gongshan   | 2300 | 10.28 | 1738.42 | 78.47 | 860.43  | 0.50 | Terrestrial | Grassy slope | Non-endemic |
| <i>Herminium lanceum</i> | Eryuan     | 2350 | 12.43 | 745.16  | 68.27 | 1210.94 | 1.63 | Terrestrial | Dense forest | Non-endemic |
| <i>Herminium lanceum</i> | Eryuan     | 2350 | 12.43 | 745.16  | 68.27 | 1210.94 | 1.63 | Terrestrial | Grassy slope | Non-endemic |
| <i>Herminium lanceum</i> | Songming   | 2380 | 11.31 | 1010.18 | 74.14 | 1134.24 | 1.12 | Terrestrial | Grassy slope | Non-endemic |
| <i>Herminium lanceum</i> | Dali       | 2400 | 12.42 | 1082.70 | 68.61 | 1256.27 | 1.16 | Terrestrial | Dense forest | Non-endemic |

|                          |           |      |       |         |       |         |      |             |              |             |
|--------------------------|-----------|------|-------|---------|-------|---------|------|-------------|--------------|-------------|
| <i>Herminium lanceum</i> | Fengqing  | 2400 | 11.80 | 1352.80 | 73.24 | 1172.52 | 0.87 | Terrestrial | Grassy slope | Non-endemic |
| <i>Herminium lanceum</i> | Kunming   | 2400 | 11.88 | 1019.14 | 72.30 | 1197.62 | 1.18 | Terrestrial | Grassy slope | Non-endemic |
| <i>Herminium lanceum</i> | Jingdong  | 2400 | 11.18 | 1128.40 | 76.80 | 1142.11 | 1.01 | Terrestrial | Grassy slope | Non-endemic |
| <i>Herminium lanceum</i> | Dali      | 2470 | 12.00 | 1082.70 | 68.61 | 1256.27 | 1.16 | Terrestrial | Grassy slope | Non-endemic |
| <i>Herminium lanceum</i> | Gongshan  | 2500 | 9.08  | 1738.42 | 78.47 | 860.43  | 0.50 | Terrestrial | Dense forest | Non-endemic |
| <i>Herminium lanceum</i> | Lijiang   | 2500 | 12.07 | 982.53  | 63.24 | 1077.65 | 1.10 | Terrestrial | Grassy slope | Non-endemic |
| <i>Herminium lanceum</i> | Dali      | 2600 | 11.22 | 1082.70 | 68.61 | 1256.27 | 1.16 | Terrestrial | Grassy slope | Non-endemic |
| <i>Herminium lanceum</i> | Yongde    | 2660 | 11.17 | 1266.25 | 69.00 | 1283.63 | 1.01 | Terrestrial | Grassy slope | Non-endemic |
| <i>Herminium lanceum</i> | Lijiang   | 2700 | 10.87 | 982.53  | 63.24 | 1077.65 | 1.10 | Terrestrial | Dense forest | Non-endemic |
| <i>Herminium lanceum</i> | Gongshan  | 2700 | 7.88  | 1738.42 | 78.47 | 860.43  | 0.50 | Terrestrial | Grassy slope | Non-endemic |
| <i>Herminium lanceum</i> | Yongde    | 2700 | 10.93 | 1266.25 | 69.00 | 1283.63 | 1.01 | Terrestrial | Grassy slope | Non-endemic |
| <i>Herminium lanceum</i> | Gongshan  | 2700 | 7.88  | 1738.42 | 78.47 | 860.43  | 0.50 | Terrestrial | Meadow       | Non-endemic |
| <i>Herminium lanceum</i> | Lijiang   | 2770 | 10.45 | 982.53  | 63.24 | 1077.65 | 1.10 | Terrestrial | Grassy slope | Non-endemic |
| <i>Herminium lanceum</i> | Longling  | 2800 | 7.32  | 2098.66 | 84.65 | 973.45  | 0.46 | Terrestrial | Meadow       | Non-endemic |
| <i>Herminium lanceum</i> | Wenshan   | 2800 | 8.86  | 988.87  | 76.70 | 1272.98 | 1.29 | Terrestrial | Shrubland    | Non-endemic |
| <i>Herminium lanceum</i> | Yongde    | 2810 | 10.27 | 1266.25 | 69.00 | 1283.63 | 1.01 | Terrestrial | Meadow       | Non-endemic |
| <i>Herminium lanceum</i> | Lijiang   | 2850 | 9.97  | 982.53  | 63.24 | 1077.65 | 1.10 | Terrestrial | Dense forest | Non-endemic |
| <i>Herminium lanceum</i> | Jingdong  | 2850 | 8.48  | 1128.40 | 76.80 | 1142.11 | 1.01 | Terrestrial | Grassy slope | Non-endemic |
| <i>Herminium lanceum</i> | Dali      | 2900 | 9.42  | 1082.70 | 68.61 | 1256.27 | 1.16 | Terrestrial | Meadow       | Non-endemic |
| <i>Herminium lanceum</i> | Zhongdian | 2900 | 8.04  | 641.73  | 69.05 | 914.89  | 1.43 | Terrestrial | Meadow       | Non-endemic |
| <i>Herminium lanceum</i> | Lijiang   | 2950 | 9.37  | 982.53  | 63.24 | 1077.65 | 1.10 | Terrestrial | Shrubland    | Non-endemic |
| <i>Herminium lanceum</i> | Heqing    | 3000 | 8.79  | 977.00  | 65.16 | 1211.84 | 1.24 | Terrestrial | Dense forest | Non-endemic |
| <i>Herminium lanceum</i> | Weixi     | 3000 | 7.43  | 970.70  | 69.95 | 1021.03 | 1.05 | Terrestrial | Dense forest | Non-endemic |
| <i>Herminium lanceum</i> | Zhongdian | 3000 | 7.44  | 641.73  | 69.05 | 914.89  | 1.43 | Terrestrial | Grassy slope | Non-endemic |
| <i>Herminium lanceum</i> | Dongchuan | 3000 | 7.83  | 1021.73 | 71.65 | 1186.61 | 1.16 | Terrestrial | Grassy slope | Non-endemic |
| <i>Herminium lanceum</i> | Huaping   | 3050 | 8.85  | 1092.50 | 61.93 | 1424.09 | 1.30 | Terrestrial | Grassy slope | Non-endemic |
| <i>Herminium lanceum</i> | Dali      | 3100 | 8.22  | 1082.70 | 68.61 | 1256.27 | 1.16 | Terrestrial | Meadow       | Non-endemic |
| <i>Herminium lanceum</i> | Weixi     | 3200 | 6.23  | 970.70  | 69.95 | 1021.03 | 1.05 | Terrestrial | Dense forest | Non-endemic |
| <i>Herminium lanceum</i> | Weixi     | 3300 | 5.63  | 970.70  | 69.95 | 1021.03 | 1.05 | Terrestrial | Grassy slope | Non-endemic |
| <i>Herminium lanceum</i> | Weixi     | 3300 | 5.63  | 970.70  | 69.95 | 1021.03 | 1.05 | Terrestrial | Grassy slope | Non-endemic |
| <i>Herminium lanceum</i> | Zhongdian | 3300 | 5.64  | 641.73  | 69.05 | 914.89  | 1.43 | Terrestrial | Grassy slope | Non-endemic |
| <i>Herminium lanceum</i> | Zhongdian | 3300 | 5.64  | 641.73  | 69.05 | 914.89  | 1.43 | Terrestrial | Meadow       | Non-endemic |
| <i>Herminium lanceum</i> | Zhongdian | 3440 | 4.80  | 641.73  | 69.05 | 914.89  | 1.43 | Terrestrial | Dense forest | Non-endemic |
| <i>Herminium lanceum</i> | Deqin     | 3500 | 4.17  | 639.48  | 70.85 | 896.66  | 1.40 | Terrestrial | Grassy slope | Non-endemic |
| <i>Herminium lanceum</i> | Dongchuan | 3500 | 4.83  | 1021.73 | 71.65 | 1186.61 | 1.16 | Terrestrial | Meadow       | Non-endemic |
| <i>Herminium lanceum</i> | Zhongdian | 3520 | 4.32  | 641.73  | 69.05 | 914.89  | 1.43 | Terrestrial | Dense forest | Non-endemic |



|                                  |           |      |       |         |       |         |      |             |              |             |
|----------------------------------|-----------|------|-------|---------|-------|---------|------|-------------|--------------|-------------|
| <i>Herminium lanceum</i>         | Lijiang   | 3610 | 5.41  | 982.53  | 63.24 | 1077.65 | 1.10 | Terrestrial | Meadow       | Non-endemic |
| <i>Herminium monorchis</i>       | Zhongdian | 3000 | 7.44  | 641.73  | 69.05 | 914.89  | 1.43 | Terrestrial | Dense forest | Non-endemic |
| <i>Herminium monorchis</i>       | Zhongdian | 4300 | -0.36 | 641.73  | 69.05 | 914.89  | 1.43 | Terrestrial | Shrubland    | Non-endemic |
| <i>Herminium ophioglossoides</i> | Zhongdian | 2300 | 11.64 | 641.73  | 69.05 | 914.89  | 1.43 | Terrestrial | Shrubland    | Non-endemic |
| <i>Herminium ophioglossoides</i> | Dali      | 2400 | 12.42 | 1082.70 | 68.61 | 1256.27 | 1.16 | Terrestrial | Grassy slope | Non-endemic |
| <i>Herminium ophioglossoides</i> | Yaoan     | 2400 | 12.14 | 784.85  | 68.90 | 1295.94 | 1.65 | Terrestrial | Shrubland    | Non-endemic |
| <i>Herminium ophioglossoides</i> | Lijiang   | 2420 | 12.55 | 982.53  | 63.24 | 1077.65 | 1.10 | Terrestrial | Grassy slope | Non-endemic |
| <i>Herminium ophioglossoides</i> | Lijiang   | 2600 | 11.47 | 982.53  | 63.24 | 1077.65 | 1.10 | Terrestrial | Grassy slope | Non-endemic |
| <i>Herminium ophioglossoides</i> | Lijiang   | 2700 | 10.87 | 982.53  | 63.24 | 1077.65 | 1.10 | Terrestrial | Shrubland    | Non-endemic |
| <i>Herminium ophioglossoides</i> | Lijiang   | 2800 | 10.27 | 982.53  | 63.24 | 1077.65 | 1.10 | Terrestrial | Meadow       | Non-endemic |
| <i>Herminium ophioglossoides</i> | Lijiang   | 2870 | 9.85  | 982.53  | 63.24 | 1077.65 | 1.10 | Terrestrial | Dense forest | Non-endemic |
| <i>Herminium ophioglossoides</i> | Zhongdian | 3100 | 6.84  | 641.73  | 69.05 | 914.89  | 1.43 | Terrestrial | Dense forest | Non-endemic |
| <i>Herminium ophioglossoides</i> | Zhongdian | 3100 | 6.84  | 641.73  | 69.05 | 914.89  | 1.43 | Terrestrial | Grassy slope | Non-endemic |
| <i>Herminium ophioglossoides</i> | Zhongdian | 3200 | 6.24  | 641.73  | 69.05 | 914.89  | 1.43 | Terrestrial | Meadow       | Non-endemic |
| <i>Herminium ophioglossoides</i> | Lijiang   | 3200 | 7.87  | 982.53  | 63.24 | 1077.65 | 1.10 | Terrestrial | Meadow       | Non-endemic |
| <i>Herminium ophioglossoides</i> | Lijiang   | 3200 | 7.87  | 982.53  | 63.24 | 1077.65 | 1.10 | Terrestrial | Meadow       | Non-endemic |
| <i>Herminium ophioglossoides</i> | Zhongdian | 3230 | 6.06  | 641.73  | 69.05 | 914.89  | 1.43 | Terrestrial | Dense forest | Non-endemic |
| <i>Herminium ophioglossoides</i> | Zhongdian | 3420 | 4.92  | 641.73  | 69.05 | 914.89  | 1.43 | Terrestrial | Grassy slope | Non-endemic |
| <i>Herminium ophioglossoides</i> | Zhongdian | 3500 | 4.44  | 641.73  | 69.05 | 914.89  | 1.43 | Terrestrial | Open site    | Non-endemic |
| <i>Herminium quinquelobum</i>    | Gongshan  | 2200 | 10.88 | 1738.42 | 78.47 | 860.43  | 0.50 | Terrestrial | Dense forest | Non-endemic |
| <i>Herminium singulum</i>        | Fugong    | 2700 | 7.86  | 1441.43 | 79.99 | 906.18  | 0.63 | Terrestrial | Dense forest | Non-endemic |
| <i>Herminium souliei</i>         | Qiaojia   | 1400 | 15.22 | 878.15  | 76.01 | 1034.97 | 1.18 | Terrestrial | Grassy slope | Non-endemic |
| <i>Herminium souliei</i>         | Binchuan  | 1890 | 15.36 | 573.87  | 62.93 | 1418.42 | 2.47 | Terrestrial | Dense forest | Non-endemic |
| <i>Herminium souliei</i>         | Eryuan    | 2140 | 13.69 | 745.16  | 68.27 | 1210.94 | 1.63 | Terrestrial | Grassy slope | Non-endemic |
| <i>Herminium souliei</i>         | Lijiang   | 2800 | 10.27 | 982.53  | 63.24 | 1077.65 | 1.10 | Terrestrial | Grassy slope | Non-endemic |
| <i>Herminium souliei</i>         | Zhongdian | 2900 | 8.04  | 641.73  | 69.05 | 914.89  | 1.43 | Terrestrial | Dense forest | Non-endemic |
| <i>Herminium souliei</i>         | Menglian  | 2900 | 8.18  | 1357.68 | 80.47 | 1185.94 | 0.87 | Terrestrial | Meadow       | Non-endemic |
| <i>Herminium souliei</i>         | Lijiang   | 3000 | 9.07  | 982.53  | 63.24 | 1077.65 | 1.10 | Terrestrial | Meadow       | Non-endemic |
| <i>Herminium souliei</i>         | Dongchuan | 3050 | 7.53  | 1021.73 | 71.65 | 1186.61 | 1.16 | Terrestrial | Grassy slope | Non-endemic |
| <i>Herminium souliei</i>         | Zhongdian | 3100 | 6.84  | 641.73  | 69.05 | 914.89  | 1.43 | Terrestrial | Meadow       | Non-endemic |
| <i>Herminium souliei</i>         | Dali      | 3100 | 8.22  | 1082.70 | 68.61 | 1256.27 | 1.16 | Terrestrial | Open site    | Non-endemic |
| <i>Herminium souliei</i>         | Lushui    | 3150 | 7.15  | 1195.57 | 70.63 | 911.65  | 0.76 | Terrestrial | Meadow       | Non-endemic |
| <i>Herminium souliei</i>         | Zhongdian | 3240 | 6.00  | 641.73  | 69.05 | 914.89  | 1.43 | Terrestrial | Meadow       | Non-endemic |
| <i>Herminium souliei</i>         | Luquan    | 3250 | 6.22  | 965.09  | 73.60 | 1160.89 | 1.20 | Terrestrial | Meadow       | Non-endemic |
| <i>Herminium souliei</i>         | Luquan    | 3250 | 6.22  | 965.09  | 73.60 | 1160.89 | 1.20 | Terrestrial | Meadow       | Non-endemic |
| <i>Herminium souliei</i>         | Zhongdian | 3300 | 5.64  | 641.73  | 69.05 | 914.89  | 1.43 | Terrestrial | Meadow       | Non-endemic |

|                                  |           |      |       |         |       |         |      |             |               |             |
|----------------------------------|-----------|------|-------|---------|-------|---------|------|-------------|---------------|-------------|
| <i>Herminium souliei</i>         | Zhongdian | 3400 | 5.04  | 641.73  | 69.05 | 914.89  | 1.43 | Terrestrial | Meadow        | Non-endemic |
| <i>Herminium souliei</i>         | Lijiang   | 3550 | 5.77  | 982.53  | 63.24 | 1077.65 | 1.10 | Terrestrial | Grassy slope  | Non-endemic |
| <i>Herminium souliei</i>         | Lijiang   | 3550 | 5.77  | 982.53  | 63.24 | 1077.65 | 1.10 | Terrestrial | Meadow        | Non-endemic |
| <i>Herminium souliei</i>         | Dali      | 3900 | 3.42  | 1082.70 | 68.61 | 1256.27 | 1.16 | Terrestrial | Grassy slope  | Non-endemic |
| <i>Herminium souliei</i>         | Luquan    | 4000 | 1.72  | 965.09  | 73.60 | 1160.89 | 1.20 | Terrestrial | Grassy slope  | Non-endemic |
| <i>Herminium souliei</i>         | Luquan    | 4200 | 0.52  | 965.09  | 73.60 | 1160.89 | 1.20 | Terrestrial | Shrubland     | Non-endemic |
| <i>Herminium yunnanense</i>      | Yangbi    | 1730 | 15.61 | 1044.23 | 72.19 | 1161.15 | 1.11 | Terrestrial | Grassy slope  | Endemic     |
| <i>Herminium yunnanense</i>      | Chuxiong  | 2200 | 13.37 | 874.28  | 69.99 | 1192.36 | 1.36 | Terrestrial | Dense forest  | Endemic     |
| <i>Hetaeria rubens</i>           | Mengla    | 570  | 21.78 | 1514.70 | 84.25 | 1146.68 | 0.76 | Terrestrial | Dense forest  | Non-endemic |
| <i>Hetaeria rubens</i>           | Jinghong  | 640  | 21.88 | 1161.08 | 80.46 | 1256.19 | 1.08 | Terrestrial | Dense forest  | Non-endemic |
| <i>Hetaeria rubens</i>           | Jinghong  | 750  | 21.22 | 1161.08 | 80.46 | 1256.19 | 1.08 | Terrestrial | Dense forest  | Non-endemic |
| <i>Hetaeria rubens</i>           | Jinghong  | 820  | 20.80 | 1161.08 | 80.46 | 1256.19 | 1.08 | Terrestrial | Dense forest  | Non-endemic |
| <i>Hetaeria rubens</i>           | Malipo    | 1000 | 18.26 | 1063.54 | 85.83 | 1053.97 | 0.99 | Terrestrial | Dense forest  | Non-endemic |
| <i>Holcoglossum amesianum</i>    | Cangyuan  | 1250 | 17.72 | 1733.34 | 81.63 | 1060.82 | 0.61 | Epiphyte    | Dense forest  | Non-endemic |
| <i>Holcoglossum amesianum</i>    | Menghai   | 1350 | 17.46 | 1314.38 | 80.83 | 1150.91 | 0.88 | Epiphyte    | Sparse forest | Non-endemic |
| <i>Holcoglossum amesianum</i>    | Zhenkang  | 1640 | 15.00 | 1602.96 | 81.14 | 1089.09 | 0.68 | Epiphyte    | Dense forest  | Non-endemic |
| <i>Holcoglossum amesianum</i>    | Jingdong  | 1800 | 14.78 | 1128.40 | 76.80 | 1142.11 | 1.01 | Epiphyte    | Dense forest  | Non-endemic |
| <i>Holcoglossum flavescens</i>   | Yongde    | 2500 | 12.13 | 1266.25 | 69.00 | 1283.63 | 1.01 | Epiphyte    | Dense forest  | Non-endemic |
| <i>Holcoglossum kimballianum</i> | Xichou    | 1000 | 18.93 | 1267.54 | 82.98 | 985.97  | 0.78 | Epiphyte    | Dense forest  | Non-endemic |
| <i>Holcoglossum kimballianum</i> | Zhenyuan  | 1150 | 19.34 | 1254.48 | 77.40 | 1138.06 | 0.91 | Epiphyte    | Dense forest  | Non-endemic |
| <i>Holcoglossum kimballianum</i> | Jianchuan | 1430 | 16.97 | 753.13  | 70.16 | 1154.48 | 1.53 | Epiphyte    | Dense forest  | Non-endemic |
| <i>Holcoglossum kimballianum</i> | Menghai   | 1630 | 15.78 | 1314.38 | 80.83 | 1150.91 | 0.88 | Epiphyte    | Sparse forest | Non-endemic |
| <i>Holcoglossum kimballianum</i> | Yongde    | 2500 | 12.13 | 1266.25 | 69.00 | 1283.63 | 1.01 | Epiphyte    | Dense forest  | Non-endemic |
| <i>Holcoglossum lingulatum</i>   | Malipo    | 1000 | 18.26 | 1063.54 | 85.83 | 1053.97 | 0.99 | Epiphyte    | Sparse forest | Non-endemic |
| <i>Holcoglossum rupestre</i>     | Zhongdian | 2200 | 12.24 | 641.73  | 69.05 | 914.89  | 1.43 | Epiphyte    | Dense forest  | Endemic     |
| <i>Holcoglossum rupestre</i>     | Fugong    | 2400 | 9.66  | 1441.43 | 79.99 | 906.18  | 0.63 | Epiphyte    | Dense forest  | Endemic     |
| <i>Holcoglossum rupestre</i>     | Yangbi    | 2570 | 10.57 | 1044.23 | 72.19 | 1161.15 | 1.11 | Epiphyte    | Dense forest  | Endemic     |
| <i>Holcoglossum sinicum</i>      | Yangbi    | 1740 | 15.55 | 1044.23 | 72.19 | 1161.15 | 1.11 | Epiphyte    | Dense forest  | Non-endemic |
| <i>Holcoglossum sinicum</i>      | Yangbi    | 2710 | 9.73  | 1044.23 | 72.19 | 1161.15 | 1.11 | Epiphyte    | Dense forest  | Non-endemic |
| <i>Holcoglossum sinicum</i>      | Yangbi    | 3200 | 6.79  | 1044.23 | 72.19 | 1161.15 | 1.11 | Epiphyte    | Dense forest  | Non-endemic |
| <i>Holcoglossum wangii</i>       | Hekou     | 800  | 18.95 | 1768.58 | 84.25 | 1166.26 | 0.66 | Epiphyte    | Dense forest  | Non-endemic |
| <i>Hygrochilus parlshii</i>      | Menghai   | 1030 | 19.38 | 1314.38 | 80.83 | 1150.91 | 0.88 | Epiphyte    | Dense forest  | Non-endemic |
| <i>Hygrochilus parlshii</i>      | Menghai   | 1100 | 18.96 | 1314.38 | 80.83 | 1150.91 | 0.88 | Epiphyte    | Forest edge   | Non-endemic |
| <i>Ischnogyne mandarinanum</i>   | Jingdong  | 2600 | 9.98  | 1128.40 | 76.80 | 1142.11 | 1.01 | Epiphyte    | Dense forest  | Non-endemic |
| <i>Kingidium braceanum</i>       | Menghai   | 1500 | 16.56 | 1314.38 | 80.83 | 1150.91 | 0.88 | Epiphyte    | Dense forest  | Non-endemic |
| <i>Kingidium deliciosum</i>      | Pingbian  | 330  | 22.84 | 1648.57 | 86.34 | 990.16  | 0.60 | Epiphyte    | Dense forest  | Non-endemic |

|                             |           |      |       |         |       |         |      |            |               |             |
|-----------------------------|-----------|------|-------|---------|-------|---------|------|------------|---------------|-------------|
| <i>Kingidium deliciosum</i> | Menghai   | 1550 | 16.26 | 1314.38 | 80.83 | 1150.91 | 0.88 | Epiphyte   | Dense forest  | Non-endemic |
| <i>Kingidium taenialis</i>  | Jingdong  | 1100 | 18.98 | 1128.40 | 76.80 | 1142.11 | 1.01 | Epiphyte   | Dense forest  | Non-endemic |
| <i>Kingidium taenialis</i>  | Menghai   | 1280 | 17.88 | 1314.38 | 80.83 | 1150.91 | 0.88 | Epiphyte   | Shrubland     | Non-endemic |
| <i>Kingidium taenialis</i>  | Menghai   | 1350 | 17.46 | 1314.38 | 80.83 | 1150.91 | 0.88 | Epiphyte   | Dense forest  | Non-endemic |
| <i>Kingidium taenialis</i>  | Pingbian  | 1400 | 16.42 | 1648.57 | 86.34 | 990.16  | 0.60 | Epiphyte   | Dense forest  | Non-endemic |
| <i>Kingidium taenialis</i>  | Jingdong  | 1500 | 16.58 | 1128.40 | 76.80 | 1142.11 | 1.01 | Epiphyte   | Dense forest  | Non-endemic |
| <i>Kingidium taenialis</i>  | Menghai   | 1500 | 16.56 | 1314.38 | 80.83 | 1150.91 | 0.88 | Epiphyte   | Dense forest  | Non-endemic |
| <i>Kingidium taenialis</i>  | Fengqing  | 2100 | 13.60 | 1352.80 | 73.24 | 1172.52 | 0.87 | Epiphyte   | Dense forest  | Non-endemic |
| <i>Kingidium taenialis</i>  | Zhongdian | 2200 | 12.24 | 641.73  | 69.05 | 914.89  | 1.43 | Epiphyte   | Dense forest  | Non-endemic |
| <i>Lecanorchis japonica</i> | Luchun    | 2500 | 11.70 | 2013.54 | 78.64 | 1151.56 | 0.57 | Saprophyte | Dense forest  | Non-endemic |
| <i>Liparis assamica</i>     | Jinghong  | 800  | 20.92 | 1161.08 | 80.46 | 1256.19 | 1.08 | Epiphyte   | Dense forest  | Non-endemic |
| <i>Liparis assamica</i>     | Gongshan  | 1300 | 16.28 | 1738.42 | 78.47 | 860.43  | 0.50 | Epiphyte   | Dense forest  | Non-endemic |
| <i>Liparis assamica</i>     | Tengchong | 1800 | 14.20 | 1501.45 | 78.06 | 857.93  | 0.57 | Epiphyte   | Dense forest  | Non-endemic |
| <i>Liparis assamica</i>     | Luchun    | 2100 | 14.10 | 2013.54 | 78.64 | 1151.56 | 0.57 | Epiphyte   | Dense forest  | Non-endemic |
| <i>Liparis balansae</i>     | Pingbian  | 1400 | 16.42 | 1648.57 | 86.34 | 990.16  | 0.60 | Epiphyte   | Dense forest  | Non-endemic |
| <i>Liparis balansae</i>     | Xichou    | 1550 | 15.63 | 1267.54 | 82.98 | 985.97  | 0.78 | Epiphyte   | Dense forest  | Non-endemic |
| <i>Liparis balansae</i>     | Xichou    | 1600 | 15.33 | 1267.54 | 82.98 | 985.97  | 0.78 | Epiphyte   | Dense forest  | Non-endemic |
| <i>Liparis balansae</i>     | Malipo    | 1800 | 13.46 | 1063.54 | 85.83 | 1053.97 | 0.99 | Epiphyte   | Dense forest  | Non-endemic |
| <i>Liparis balansae</i>     | Lincang   | 2000 | 14.52 | 1165.84 | 72.08 | 1167.73 | 1.00 | Epiphyte   | Dense forest  | Non-endemic |
| <i>Liparis balansae</i>     | Luchun    | 2100 | 14.10 | 2013.54 | 78.64 | 1151.56 | 0.57 | Epiphyte   | Dense forest  | Non-endemic |
| <i>Liparis balansae</i>     | Luchun    | 2200 | 13.50 | 2013.54 | 78.64 | 1151.56 | 0.57 | Epiphyte   | Dense forest  | Non-endemic |
| <i>Liparis bautingensis</i> | Malipo    | 1200 | 17.06 | 1063.54 | 85.83 | 1053.97 | 0.99 | Epiphyte   | Sparse forest | Non-endemic |
| <i>Liparis bistrinata</i>   | Wenshan   | 1020 | 19.54 | 988.87  | 76.70 | 1272.98 | 1.29 | Epiphyte   | Dense forest  | Non-endemic |
| <i>Liparis bootanensis</i>  | Malipo    | 1300 | 16.46 | 1063.54 | 85.83 | 1053.97 | 0.99 | Epiphyte   | Dense forest  | Non-endemic |
| <i>Liparis bootanensis</i>  | Malipo    | 1400 | 15.86 | 1063.54 | 85.83 | 1053.97 | 0.99 | Epiphyte   | Dense forest  | Non-endemic |
| <i>Liparis bootanensis</i>  | Gongshan  | 1400 | 15.68 | 1738.42 | 78.47 | 860.43  | 0.50 | Epiphyte   | Dense forest  | Non-endemic |
| <i>Liparis bootanensis</i>  | Gongshan  | 1400 | 15.68 | 1738.42 | 78.47 | 860.43  | 0.50 | Epiphyte   | Dense forest  | Non-endemic |
| <i>Liparis bootanensis</i>  | Gongshan  | 1400 | 15.68 | 1738.42 | 78.47 | 860.43  | 0.50 | Epiphyte   | Dense forest  | Non-endemic |
| <i>Liparis bootanensis</i>  | Gongshan  | 1420 | 15.56 | 1738.42 | 78.47 | 860.43  | 0.50 | Epiphyte   | Dense forest  | Non-endemic |
| <i>Liparis bootanensis</i>  | Gongshan  | 1450 | 15.38 | 1738.42 | 78.47 | 860.43  | 0.50 | Epiphyte   | Dense forest  | Non-endemic |
| <i>Liparis bootanensis</i>  | Gongshan  | 1500 | 15.08 | 1738.42 | 78.47 | 860.43  | 0.50 | Epiphyte   | Dense forest  | Non-endemic |
| <i>Liparis bootanensis</i>  | Pingbian  | 1600 | 15.22 | 1648.57 | 86.34 | 990.16  | 0.60 | Epiphyte   | Dense forest  | Non-endemic |
| <i>Liparis bootanensis</i>  | Pingbian  | 1600 | 15.22 | 1648.57 | 86.34 | 990.16  | 0.60 | Epiphyte   | Dense forest  | Non-endemic |
| <i>Liparis bootanensis</i>  | Gongshan  | 1600 | 14.48 | 1738.42 | 78.47 | 860.43  | 0.50 | Epiphyte   | Dense forest  | Non-endemic |
| <i>Liparis bootanensis</i>  | Xichou    | 1700 | 14.73 | 1267.54 | 82.98 | 985.97  | 0.78 | Epiphyte   | Dense forest  | Non-endemic |
| <i>Liparis caespitosa</i>   | Menglian  | 1000 | 19.58 | 1357.68 | 80.47 | 1185.94 | 0.87 | Epiphyte   | Dense forest  | Non-endemic |

|                              |          |      |       |         |       |         |      |          |               |             |
|------------------------------|----------|------|-------|---------|-------|---------|------|----------|---------------|-------------|
| <i>Liparis caespitosa</i>    | Menghai  | 1100 | 18.96 | 1314.38 | 80.83 | 1150.91 | 0.88 | Epiphyte | Dense forest  | Non-endemic |
| <i>Liparis caespitosa</i>    | Gongshan | 1380 | 15.80 | 1738.42 | 78.47 | 860.43  | 0.50 | Epiphyte | Dense forest  | Non-endemic |
| <i>Liparis caespitosa</i>    | Gongshan | 1400 | 15.68 | 1738.42 | 78.47 | 860.43  | 0.50 | Epiphyte | Dense forest  | Non-endemic |
| <i>Liparis caespitosa</i>    | Menghai  | 1400 | 17.16 | 1314.38 | 80.83 | 1150.91 | 0.88 | Epiphyte | Dense forest  | Non-endemic |
| <i>Liparis caespitosa</i>    | Gongshan | 1680 | 14.00 | 1738.42 | 78.47 | 860.43  | 0.50 | Epiphyte | Dense forest  | Non-endemic |
| <i>Liparis caespitosa</i>    | Gongshan | 1700 | 13.88 | 1738.42 | 78.47 | 860.43  | 0.50 | Epiphyte | Dense forest  | Non-endemic |
| <i>Liparis caespitosa</i>    | Jinghong | 1700 | 15.52 | 1161.08 | 80.46 | 1256.19 | 1.08 | Epiphyte | Dense forest  | Non-endemic |
| <i>Liparis caespitosa</i>    | Gongshan | 1800 | 13.28 | 1738.42 | 78.47 | 860.43  | 0.50 | Epiphyte | Dense forest  | Non-endemic |
| <i>Liparis caespitosa</i>    | Gongshan | 1950 | 12.38 | 1738.42 | 78.47 | 860.43  | 0.50 | Epiphyte | Dense forest  | Non-endemic |
| <i>Liparis caespitosa</i>    | Gongshan | 2000 | 12.08 | 1738.42 | 78.47 | 860.43  | 0.50 | Epiphyte | Dense forest  | Non-endemic |
| <i>Liparis caespitosa</i>    | Gongshan | 2000 | 12.08 | 1738.42 | 78.47 | 860.43  | 0.50 | Epiphyte | Dense forest  | Non-endemic |
| <i>Liparis caespitosa</i>    | Gongshan | 2000 | 12.08 | 1738.42 | 78.47 | 860.43  | 0.50 | Epiphyte | Dense forest  | Non-endemic |
| <i>Liparis caespitosa</i>    | Yongde   | 2400 | 12.73 | 1266.25 | 69.00 | 1283.63 | 1.01 | Epiphyte | Shrubland     | Non-endemic |
| <i>Liparis campylostalix</i> | Fengqing | 2650 | 10.30 | 1352.80 | 73.24 | 1172.52 | 0.87 | Epiphyte | Dense forest  | Non-endemic |
| <i>Liparis cathcartii</i>    | Kunming  | 2200 | 13.08 | 1019.14 | 72.30 | 1197.62 | 1.18 | Epiphyte | Dense forest  | Non-endemic |
| <i>Liparis caespitosa</i>    | Jinghong | 800  | 20.92 | 1161.08 | 80.46 | 1256.19 | 1.08 | Epiphyte | Dense forest  | Non-endemic |
| <i>Liparis chapaensis</i>    | Gongshan | 1400 | 15.68 | 1738.42 | 78.47 | 860.43  | 0.50 | Epiphyte | Dense forest  | Non-endemic |
| <i>Liparis chapaensis</i>    | Gongshan | 1400 | 15.68 | 1738.42 | 78.47 | 860.43  | 0.50 | Epiphyte | Dense forest  | Non-endemic |
| <i>Liparis chapaensis</i>    | Gongshan | 2500 | 9.08  | 1738.42 | 78.47 | 860.43  | 0.50 | Epiphyte | Dense forest  | Non-endemic |
| <i>Liparis cordifolia</i>    | Pingbian | 1300 | 17.02 | 1648.57 | 86.34 | 990.16  | 0.60 | Epiphyte | Dense forest  | Non-endemic |
| <i>Liparis delicatula</i>    | Jinghong | 900  | 20.32 | 1161.08 | 80.46 | 1256.19 | 1.08 | Epiphyte | Dense forest  | Non-endemic |
| <i>Liparis delicatula</i>    | Menghai  | 1030 | 19.38 | 1314.38 | 80.83 | 1150.91 | 0.88 | Epiphyte | Dense forest  | Non-endemic |
| <i>Liparis delicatula</i>    | Menghai  | 1250 | 18.06 | 1314.38 | 80.83 | 1150.91 | 0.88 | Epiphyte | Dense forest  | Non-endemic |
| <i>Liparis delicatula</i>    | Menghai  | 1300 | 17.76 | 1314.38 | 80.83 | 1150.91 | 0.88 | Epiphyte | Dense forest  | Non-endemic |
| <i>Liparis distans</i>       | Funing   | 1000 | 17.62 | 1161.58 | 79.07 | 1147.17 | 0.99 | Epiphyte | Dense forest  | Non-endemic |
| <i>Liparis distans</i>       | Malipo   | 1000 | 18.26 | 1063.54 | 85.83 | 1053.97 | 0.99 | Epiphyte | Dense forest  | Non-endemic |
| <i>Liparis distans</i>       | Malipo   | 1100 | 17.66 | 1063.54 | 85.83 | 1053.97 | 0.99 | Epiphyte | Dense forest  | Non-endemic |
| <i>Liparis distans</i>       | Yanshan  | 1200 | 18.26 | 1003.57 | 79.42 | 1172.21 | 1.17 | Epiphyte | Dense forest  | Non-endemic |
| <i>Liparis distans</i>       | Yanshan  | 1200 | 18.26 | 1003.57 | 79.42 | 1172.21 | 1.17 | Epiphyte | Dense forest  | Non-endemic |
| <i>Liparis distans</i>       | Pingbian | 1200 | 17.62 | 1648.57 | 86.34 | 990.16  | 0.60 | Epiphyte | Sparse forest | Non-endemic |
| <i>Liparis distans</i>       | Malipo   | 1250 | 16.76 | 1063.54 | 85.83 | 1053.97 | 0.99 | Epiphyte | Sparse forest | Non-endemic |
| <i>Liparis distans</i>       | Jinghong | 1270 | 18.10 | 1161.08 | 80.46 | 1256.19 | 1.08 | Epiphyte | Dense forest  | Non-endemic |
| <i>Liparis distans</i>       | Gongshan | 1300 | 16.28 | 1738.42 | 78.47 | 860.43  | 0.50 | Epiphyte | Dense forest  | Non-endemic |
| <i>Liparis distans</i>       | Malipo   | 1300 | 16.46 | 1063.54 | 85.83 | 1053.97 | 0.99 | Epiphyte | Dense forest  | Non-endemic |
| <i>Liparis distans</i>       | Xichou   | 1300 | 17.13 | 1267.54 | 82.98 | 985.97  | 0.78 | Epiphyte | Dense forest  | Non-endemic |
| <i>Liparis distans</i>       | Xichou   | 1300 | 17.13 | 1267.54 | 82.98 | 985.97  | 0.78 | Epiphyte | Dense forest  | Non-endemic |

|                          |          |      |       |         |       |         |      |             |               |             |
|--------------------------|----------|------|-------|---------|-------|---------|------|-------------|---------------|-------------|
| <i>Liparis distans</i>   | Xichou   | 1300 | 17.13 | 1267.54 | 82.98 | 985.97  | 0.78 | Epiphyte    | Dense forest  | Non-endemic |
| <i>Liparis distans</i>   | Xichou   | 1300 | 17.13 | 1267.54 | 82.98 | 985.97  | 0.78 | Epiphyte    | Dense forest  | Non-endemic |
| <i>Liparis distans</i>   | Xichou   | 1350 | 16.83 | 1267.54 | 82.98 | 985.97  | 0.78 | Epiphyte    | Sparse forest | Non-endemic |
| <i>Liparis distans</i>   | Pingbian | 1400 | 16.42 | 1648.57 | 86.34 | 990.16  | 0.60 | Epiphyte    | Dense forest  | Non-endemic |
| <i>Liparis distans</i>   | Pingbian | 1400 | 16.42 | 1648.57 | 86.34 | 990.16  | 0.60 | Epiphyte    | Dense forest  | Non-endemic |
| <i>Liparis distans</i>   | Gongshan | 1470 | 15.26 | 1738.42 | 78.47 | 860.43  | 0.50 | Epiphyte    | Dense forest  | Non-endemic |
| <i>Liparis distans</i>   | Xichou   | 1480 | 16.05 | 1267.54 | 82.98 | 985.97  | 0.78 | Epiphyte    | Dense forest  | Non-endemic |
| <i>Liparis distans</i>   | Malipo   | 1500 | 15.26 | 1063.54 | 85.83 | 1053.97 | 0.99 | Epiphyte    | Dense forest  | Non-endemic |
| <i>Liparis distans</i>   | Pingbian | 1500 | 15.82 | 1648.57 | 86.34 | 990.16  | 0.60 | Epiphyte    | Dense forest  | Non-endemic |
| <i>Liparis distans</i>   | Xichou   | 1500 | 15.93 | 1267.54 | 82.98 | 985.97  | 0.78 | Epiphyte    | Shrubland     | Non-endemic |
| <i>Liparis distans</i>   | Malipo   | 1600 | 14.66 | 1063.54 | 85.83 | 1053.97 | 0.99 | Epiphyte    | Dense forest  | Non-endemic |
| <i>Liparis distans</i>   | Xichou   | 1600 | 15.33 | 1267.54 | 82.98 | 985.97  | 0.78 | Epiphyte    | Dense forest  | Non-endemic |
| <i>Liparis distans</i>   | Malipo   | 1600 | 14.66 | 1063.54 | 85.83 | 1053.97 | 0.99 | Epiphyte    | Dense forest  | Non-endemic |
| <i>Liparis distans</i>   | Pingbian | 1700 | 14.62 | 1648.57 | 86.34 | 990.16  | 0.60 | Epiphyte    | Shrubland     | Non-endemic |
| <i>Liparis distans</i>   | Fugong   | 1800 | 13.26 | 1441.43 | 79.99 | 906.18  | 0.63 | Epiphyte    | Dense forest  | Non-endemic |
| <i>Liparis distans</i>   | Gongshan | 1800 | 13.28 | 1738.42 | 78.47 | 860.43  | 0.50 | Epiphyte    | Dense forest  | Non-endemic |
| <i>Liparis distans</i>   | Gongshan | 1800 | 13.28 | 1738.42 | 78.47 | 860.43  | 0.50 | Epiphyte    | Dense forest  | Non-endemic |
| <i>Liparis distans</i>   | Gongshan | 1850 | 12.98 | 1738.42 | 78.47 | 860.43  | 0.50 | Epiphyte    | Sparse forest | Non-endemic |
| <i>Liparis distans</i>   | Fugong   | 1900 | 12.66 | 1441.43 | 79.99 | 906.18  | 0.63 | Epiphyte    | Dense forest  | Non-endemic |
| <i>Liparis distans</i>   | Luchun   | 1900 | 15.30 | 2013.54 | 78.64 | 1151.56 | 0.57 | Epiphyte    | Dense forest  | Non-endemic |
| <i>Liparis distans</i>   | Gongshan | 2000 | 12.08 | 1738.42 | 78.47 | 860.43  | 0.50 | Epiphyte    | Dense forest  | Non-endemic |
| <i>Liparis distans</i>   | Fugong   | 2000 | 12.06 | 1441.43 | 79.99 | 906.18  | 0.63 | Epiphyte    | Dense forest  | Non-endemic |
| <i>Liparis distans</i>   | Gongshan | 2100 | 11.48 | 1738.42 | 78.47 | 860.43  | 0.50 | Epiphyte    | Dense forest  | Non-endemic |
| <i>Liparis distans</i>   | Gongshan | 2300 | 10.28 | 1738.42 | 78.47 | 860.43  | 0.50 | Epiphyte    | Dense forest  | Non-endemic |
| <i>Liparis distans</i>   | Weixi    | 2400 | 11.03 | 970.70  | 69.95 | 1021.03 | 1.05 | Epiphyte    | Dense forest  | Non-endemic |
| <i>Liparis distans</i>   | Luchun   | 2400 | 12.30 | 2013.54 | 78.64 | 1151.56 | 0.57 | Epiphyte    | Dense forest  | Non-endemic |
| <i>Liparis distans</i>   | Fugong   | 2800 | 7.26  | 1441.43 | 79.99 | 906.18  | 0.63 | Epiphyte    | Dense forest  | Non-endemic |
| <i>Liparis elliptica</i> | Mengla   | 700  | 21.00 | 1514.70 | 84.25 | 1146.68 | 0.76 | Epiphyte    | Dense forest  | Non-endemic |
| <i>Liparis elliptica</i> | Menghai  | 1300 | 17.76 | 1314.38 | 80.83 | 1150.91 | 0.88 | Epiphyte    | Dense forest  | Non-endemic |
| <i>Liparis elliptica</i> | Gongshan | 1300 | 16.28 | 1738.42 | 78.47 | 860.43  | 0.50 | Epiphyte    | Dense forest  | Non-endemic |
| <i>Liparis elliptica</i> | Jinping  | 1500 | 16.49 | 2305.17 | 83.81 | 1030.46 | 0.45 | Epiphyte    | Dense forest  | Non-endemic |
| <i>Liparis elliptica</i> | Menghai  | 1520 | 16.44 | 1314.38 | 80.83 | 1150.91 | 0.88 | Epiphyte    | Shrubland     | Non-endemic |
| <i>Liparis elliptica</i> | Menghai  | 1530 | 16.38 | 1314.38 | 80.83 | 1150.91 | 0.88 | Epiphyte    | Dense forest  | Non-endemic |
| <i>Liparis elliptica</i> | Menghai  | 1630 | 15.78 | 1314.38 | 80.83 | 1150.91 | 0.88 | Terrestrial | Sparse forest | Non-endemic |
| <i>Liparis glossula</i>  | Wenshan  | 2200 | 12.46 | 988.87  | 76.70 | 1272.98 | 1.29 | Terrestrial | Dense forest  | Non-endemic |
| <i>Liparis japonica</i>  | Jingdong | 1670 | 15.56 | 1128.40 | 76.80 | 1142.11 | 1.01 | Terrestrial | Grassy slope  | Non-endemic |

|                           |           |      |       |         |       |         |      |             |               |             |
|---------------------------|-----------|------|-------|---------|-------|---------|------|-------------|---------------|-------------|
| <i>Liparis japonica</i>   | Yangbi    | 1770 | 15.37 | 1044.23 | 72.19 | 1161.15 | 1.11 | Terrestrial | Dense forest  | Non-endemic |
| <i>Liparis japonica</i>   | Yiliang   | 1900 | 10.88 | 751.45  | 71.67 | 1097.64 | 1.46 | Terrestrial | Dense forest  | Non-endemic |
| <i>Liparis japonica</i>   | Lincang   | 1900 | 15.12 | 1165.84 | 72.08 | 1167.73 | 1.00 | Terrestrial | Grassy slope  | Non-endemic |
| <i>Liparis japonica</i>   | Zhenxiong | 1900 | 10.04 | 899.34  | 83.70 | 852.28  | 0.95 | Terrestrial | Shrubland     | Non-endemic |
| <i>Liparis japonica</i>   | Gongshan  | 2070 | 11.66 | 1738.42 | 78.47 | 860.43  | 0.50 | Terrestrial | Dense forest  | Non-endemic |
| <i>Liparis japonica</i>   | Yongde    | 2350 | 13.03 | 1266.25 | 69.00 | 1283.63 | 1.01 | Terrestrial | Grassy slope  | Non-endemic |
| <i>Liparis japonica</i>   | Songming  | 2400 | 11.19 | 1010.18 | 74.14 | 1134.24 | 1.12 | Terrestrial | Dense forest  | Non-endemic |
| <i>Liparis japonica</i>   | Yongde    | 2400 | 12.73 | 1266.25 | 69.00 | 1283.63 | 1.01 | Terrestrial | Grassy slope  | Non-endemic |
| <i>Liparis japonica</i>   | Yongde    | 2400 | 12.73 | 1266.25 | 69.00 | 1283.63 | 1.01 | Terrestrial | Grassy slope  | Non-endemic |
| <i>Liparis japonica</i>   | Dongchuan | 3000 | 7.83  | 1021.73 | 71.65 | 1186.61 | 1.16 | Terrestrial | Grassy slope  | Non-endemic |
| <i>Liparis latilabris</i> | Maguan    | 1400 | 16.61 | 1330.52 | 83.25 | 1086.43 | 0.82 | Epiphyte    | Dense forest  | Non-endemic |
| <i>Liparis latilabris</i> | Maguan    | 1400 | 16.61 | 1330.52 | 83.25 | 1086.43 | 0.82 | Epiphyte    | Dense forest  | Non-endemic |
| <i>Liparis latilabris</i> | Anning    | 2100 | 13.43 | 896.67  | 71.23 | 1167.91 | 1.30 | Epiphyte    | Dense forest  | Non-endemic |
| <i>Liparis mannii</i>     | Mengla    | 820  | 20.28 | 1514.70 | 84.25 | 1146.68 | 0.76 | Epiphyte    | Dense forest  | Non-endemic |
| <i>Liparis nervosa</i>    | Hekou     | 320  | 21.83 | 1768.58 | 84.25 | 1166.26 | 0.66 | Terrestrial | Dense forest  | Non-endemic |
| <i>Liparis nervosa</i>    | Hekou     | 480  | 20.87 | 1768.58 | 84.25 | 1166.26 | 0.66 | Terrestrial | Dense forest  | Non-endemic |
| <i>Liparis nervosa</i>    | Mengla    | 500  | 22.20 | 1514.70 | 84.25 | 1146.68 | 0.76 | Terrestrial | Open site     | Non-endemic |
| <i>Liparis nervosa</i>    | Mengla    | 800  | 20.40 | 1514.70 | 84.25 | 1146.68 | 0.76 | Terrestrial | Dense forest  | Non-endemic |
| <i>Liparis nervosa</i>    | Shizong   | 850  | 19.95 | 1204.89 | 79.59 | 1053.84 | 0.88 | Terrestrial | Grassy slope  | Non-endemic |
| <i>Liparis nervosa</i>    | Shizong   | 900  | 19.65 | 1204.89 | 79.59 | 1053.84 | 0.88 | Terrestrial | Grassy slope  | Non-endemic |
| <i>Liparis nervosa</i>    | Yanshan   | 1200 | 18.26 | 1003.57 | 79.42 | 1172.21 | 1.17 | Terrestrial | Dense forest  | Non-endemic |
| <i>Liparis nervosa</i>    | Gongshan  | 1200 | 16.88 | 1738.42 | 78.47 | 860.43  | 0.50 | Terrestrial | Dense forest  | Non-endemic |
| <i>Liparis nervosa</i>    | Malipo    | 1200 | 17.06 | 1063.54 | 85.83 | 1053.97 | 0.99 | Terrestrial | Sparse forest | Non-endemic |
| <i>Liparis nervosa</i>    | Gongshan  | 1380 | 15.80 | 1738.42 | 78.47 | 860.43  | 0.50 | Terrestrial | Dense forest  | Non-endemic |
| <i>Liparis nervosa</i>    | Xichou    | 1500 | 15.93 | 1267.54 | 82.98 | 985.97  | 0.78 | Terrestrial | Dense forest  | Non-endemic |
| <i>Liparis nervosa</i>    | Eshan     | 1500 | 16.21 | 938.39  | 78.62 | 1123.48 | 1.20 | Terrestrial | Dense forest  | Non-endemic |
| <i>Liparis nervosa</i>    | Pingbian  | 1600 | 15.22 | 1648.57 | 86.34 | 990.16  | 0.60 | Terrestrial | Dense forest  | Non-endemic |
| <i>Liparis nervosa</i>    | Yongde    | 1600 | 17.53 | 1266.25 | 69.00 | 1283.63 | 1.01 | Terrestrial | Dense forest  | Non-endemic |
| <i>Liparis nervosa</i>    | Lincang   | 1700 | 16.32 | 1165.84 | 72.08 | 1167.73 | 1.00 | Terrestrial | Dense forest  | Non-endemic |
| <i>Liparis nervosa</i>    | Yangbi    | 1730 | 15.61 | 1044.23 | 72.19 | 1161.15 | 1.11 | Terrestrial | Dense forest  | Non-endemic |
| <i>Liparis nervosa</i>    | Malipo    | 2000 | 12.26 | 1063.54 | 85.83 | 1053.97 | 0.99 | Terrestrial | Dense forest  | Non-endemic |
| <i>Liparis nervosa</i>    | Tengchong | 2020 | 12.88 | 1501.45 | 78.06 | 857.93  | 0.57 | Terrestrial | Dense forest  | Non-endemic |
| <i>Liparis nervosa</i>    | Fengqing  | 2100 | 13.60 | 1352.80 | 73.24 | 1172.52 | 0.87 | Terrestrial | Dense forest  | Non-endemic |
| <i>Liparis nervosa</i>    | Jingdong  | 2200 | 12.38 | 1128.40 | 76.80 | 1142.11 | 1.01 | Terrestrial | Shrubland     | Non-endemic |
| <i>Liparis nigra</i>      | Yongde    | 1400 | 18.73 | 1266.25 | 69.00 | 1283.63 | 1.01 | Terrestrial | Grassy slope  | Non-endemic |
| <i>Liparis odorata</i>    | Jinghong  | 550  | 22.42 | 1161.08 | 80.46 | 1256.19 | 1.08 | Terrestrial | Sparse forest | Non-endemic |

|                            |          |      |       |         |       |         |      |             |               |             |
|----------------------------|----------|------|-------|---------|-------|---------|------|-------------|---------------|-------------|
| <i>Liparis odorata</i>     | Jinghong | 900  | 20.32 | 1161.08 | 80.46 | 1256.19 | 1.08 | Terrestrial | Dense forest  | Non-endemic |
| <i>Liparis odorata</i>     | Pingbian | 1400 | 16.42 | 1648.57 | 86.34 | 990.16  | 0.60 | Terrestrial | Dense forest  | Non-endemic |
| <i>Liparis odorata</i>     | Yongren  | 1630 | 16.97 | 865.52  | 65.40 | 1457.77 | 1.68 | Terrestrial | Forest edge   | Non-endemic |
| <i>Liparis odorata</i>     | Anning   | 1820 | 15.11 | 896.67  | 71.23 | 1167.91 | 1.30 | Terrestrial | Dense forest  | Non-endemic |
| <i>Liparis odorata</i>     | Kunming  | 1900 | 14.88 | 1019.14 | 72.30 | 1197.62 | 1.18 | Terrestrial | Dense forest  | Non-endemic |
| <i>Liparis odorata</i>     | Jingdong | 2100 | 12.98 | 1128.40 | 76.80 | 1142.11 | 1.01 | Terrestrial | Dense forest  | Non-endemic |
| <i>Liparis odorata</i>     | Anning   | 2100 | 13.43 | 896.67  | 71.23 | 1167.91 | 1.30 | Terrestrial | Sparse forest | Non-endemic |
| <i>Liparis odorata</i>     | Heqing   | 2200 | 13.59 | 977.00  | 65.16 | 1211.84 | 1.24 | Terrestrial | Grassy slope  | Non-endemic |
| <i>Liparis pauliana</i>    | Jingdong | 1900 | 14.18 | 1128.40 | 76.80 | 1142.11 | 1.01 | Terrestrial | Dense forest  | Non-endemic |
| <i>Liparis pauliana</i>    | Kunming  | 1950 | 14.58 | 1019.14 | 72.30 | 1197.62 | 1.18 | Terrestrial | Dense forest  | Non-endemic |
| <i>Liparis pauliana</i>    | Kunming  | 2100 | 13.68 | 1019.14 | 72.30 | 1197.62 | 1.18 | Terrestrial | Dense forest  | Non-endemic |
| <i>Liparis pauliana</i>    | Kunming  | 2200 | 13.08 | 1019.14 | 72.30 | 1197.62 | 1.18 | Terrestrial | Dense forest  | Non-endemic |
| <i>Liparis pauliana</i>    | Kunming  | 2300 | 12.48 | 1019.14 | 72.30 | 1197.62 | 1.18 | Terrestrial | Grassy slope  | Non-endemic |
| <i>Liparis petiolata</i>   | Mengla   | 1000 | 19.20 | 1514.70 | 84.25 | 1146.68 | 0.76 | Terrestrial | Dense forest  | Non-endemic |
| <i>Liparis petiolata</i>   | Menglian | 2400 | 11.18 | 1357.68 | 80.47 | 1185.94 | 0.87 | Terrestrial | Shrubland     | Non-endemic |
| <i>Liparis petiolata</i>   | Lincang  | 2900 | 9.12  | 1165.84 | 72.08 | 1167.73 | 1.00 | Terrestrial | Dense forest  | Non-endemic |
| <i>Liparis platyrachis</i> | Dali     | 1500 | 17.82 | 1082.70 | 68.61 | 1256.27 | 1.16 | Epiphyte    | Dense forest  | Non-endemic |
| <i>Liparis regnieri</i>    | Jingdong | 980  | 19.70 | 1128.40 | 76.80 | 1142.11 | 1.01 | Terrestrial | Dense forest  | Non-endemic |
| <i>Liparis resupinata</i>  | Gongshan | 1320 | 16.16 | 1738.42 | 78.47 | 860.43  | 0.50 | Epiphyte    | Dense forest  | Non-endemic |
| <i>Liparis resupinata</i>  | Gongshan | 1400 | 15.68 | 1738.42 | 78.47 | 860.43  | 0.50 | Epiphyte    | Dense forest  | Non-endemic |
| <i>Liparis resupinata</i>  | Gongshan | 1450 | 15.38 | 1738.42 | 78.47 | 860.43  | 0.50 | Epiphyte    | Dense forest  | Non-endemic |
| <i>Liparis resupinata</i>  | Gongshan | 1450 | 15.38 | 1738.42 | 78.47 | 860.43  | 0.50 | Epiphyte    | Dense forest  | Non-endemic |
| <i>Liparis resupinata</i>  | Malipo   | 1500 | 15.26 | 1063.54 | 85.83 | 1053.97 | 0.99 | Epiphyte    | Dense forest  | Non-endemic |
| <i>Liparis resupinata</i>  | Gongshan | 1500 | 15.08 | 1738.42 | 78.47 | 860.43  | 0.50 | Epiphyte    | Dense forest  | Non-endemic |
| <i>Liparis resupinata</i>  | Gongshan | 1500 | 15.08 | 1738.42 | 78.47 | 860.43  | 0.50 | Epiphyte    | Dense forest  | Non-endemic |
| <i>Liparis resupinata</i>  | Malipo   | 1560 | 14.90 | 1063.54 | 85.83 | 1053.97 | 0.99 | Epiphyte    | Dense forest  | Non-endemic |
| <i>Liparis resupinata</i>  | Gongshan | 1600 | 14.48 | 1738.42 | 78.47 | 860.43  | 0.50 | Epiphyte    | Dense forest  | Non-endemic |
| <i>Liparis resupinata</i>  | Gongshan | 1600 | 14.48 | 1738.42 | 78.47 | 860.43  | 0.50 | Epiphyte    | Dense forest  | Non-endemic |
| <i>Liparis resupinata</i>  | Gongshan | 1600 | 14.48 | 1738.42 | 78.47 | 860.43  | 0.50 | Epiphyte    | Dense forest  | Non-endemic |
| <i>Liparis resupinata</i>  | Gongshan | 1600 | 14.48 | 1738.42 | 78.47 | 860.43  | 0.50 | Epiphyte    | Dense forest  | Non-endemic |
| <i>Liparis resupinata</i>  | Gongshan | 1750 | 13.58 | 1738.42 | 78.47 | 860.43  | 0.50 | Epiphyte    | Dense forest  | Non-endemic |
| <i>Liparis resupinata</i>  | Gongshan | 1800 | 13.28 | 1738.42 | 78.47 | 860.43  | 0.50 | Epiphyte    | Dense forest  | Non-endemic |
| <i>Liparis resupinata</i>  | Gongshan | 1800 | 13.28 | 1738.42 | 78.47 | 860.43  | 0.50 | Epiphyte    | Shrubland     | Non-endemic |
| <i>Liparis resupinata</i>  | Jingdong | 2100 | 12.98 | 1128.40 | 76.80 | 1142.11 | 1.01 | Epiphyte    | Dense forest  | Non-endemic |
| <i>Liparis resupinata</i>  | Jingdong | 2100 | 12.98 | 1128.40 | 76.80 | 1142.11 | 1.01 | Epiphyte    | Dense forest  | Non-endemic |
| <i>Liparis resupinata</i>  | Luchun   | 2200 | 13.50 | 2013.54 | 78.64 | 1151.56 | 0.57 | Epiphyte    | Dense forest  | Non-endemic |
| <i>Liparis resupinata</i>  | Jingdong | 2400 | 11.18 | 1128.40 | 76.80 | 1142.11 | 1.01 | Epiphyte    | Dense forest  | Non-endemic |

|                               |          |      |       |         |       |         |      |             |              |             |
|-------------------------------|----------|------|-------|---------|-------|---------|------|-------------|--------------|-------------|
| <i>Liparis resupinata</i>     | Lincang  | 2500 | 11.52 | 1165.84 | 72.08 | 1167.73 | 1.00 | Epiphyte    | Dense forest | Non-endemic |
| <i>Liparis siamensis</i>      | Jinghong | 700  | 21.52 | 1161.08 | 80.46 | 1256.19 | 1.08 | Epiphyte    | Dense forest | Non-endemic |
| <i>Liparis stricklandiana</i> | Malipo   | 1350 | 16.16 | 1063.54 | 85.83 | 1053.97 | 0.99 | Epiphyte    | Forest edge  | Non-endemic |
| <i>Liparis stricklandiana</i> | Gongshan | 1400 | 15.68 | 1738.42 | 78.47 | 860.43  | 0.50 | Epiphyte    | Dense forest | Non-endemic |
| <i>Liparis stricklandiana</i> | Gongshan | 1480 | 15.20 | 1738.42 | 78.47 | 860.43  | 0.50 | Epiphyte    | Dense forest | Non-endemic |
| <i>Liparis stricklandiana</i> | Malipo   | 1500 | 15.26 | 1063.54 | 85.83 | 1053.97 | 0.99 | Epiphyte    | Dense forest | Non-endemic |
| <i>Liparis stricklandiana</i> | Gongshan | 1580 | 14.60 | 1738.42 | 78.47 | 860.43  | 0.50 | Epiphyte    | Dense forest | Non-endemic |
| <i>Liparis stricklandiana</i> | Gongshan | 1620 | 14.36 | 1738.42 | 78.47 | 860.43  | 0.50 | Epiphyte    | Dense forest | Non-endemic |
| <i>Liparis stricklandiana</i> | Gongshan | 1720 | 13.76 | 1738.42 | 78.47 | 860.43  | 0.50 | Epiphyte    | Dense forest | Non-endemic |
| <i>Liparis stricklandiana</i> | Gongshan | 1800 | 13.28 | 1738.42 | 78.47 | 860.43  | 0.50 | Epiphyte    | Dense forest | Non-endemic |
| <i>Liparis stricklandiana</i> | Gongshan | 1800 | 13.28 | 1738.42 | 78.47 | 860.43  | 0.50 | Epiphyte    | Dense forest | Non-endemic |
| <i>Liparis stricklandiana</i> | Gongshan | 2000 | 12.08 | 1738.42 | 78.47 | 860.43  | 0.50 | Epiphyte    | Dense forest | Non-endemic |
| <i>Liparis tschangii</i>      | Jinghong | 1100 | 19.12 | 1161.08 | 80.46 | 1256.19 | 1.08 | Terrestrial | Dense forest | Non-endemic |
| <i>Liparis viridiflora</i>    | Mengla   | 550  | 21.90 | 1514.70 | 84.25 | 1146.68 | 0.76 | Epiphyte    | Dense forest | Non-endemic |
| <i>Liparis viridiflora</i>    | Mengla   | 700  | 21.00 | 1514.70 | 84.25 | 1146.68 | 0.76 | Epiphyte    | Dense forest | Non-endemic |
| <i>Liparis viridiflora</i>    | Mengla   | 720  | 20.88 | 1514.70 | 84.25 | 1146.68 | 0.76 | Epiphyte    | Dense forest | Non-endemic |
| <i>Liparis viridiflora</i>    | Menghai  | 720  | 21.24 | 1314.38 | 80.83 | 1150.91 | 0.88 | Epiphyte    | Dense forest | Non-endemic |
| <i>Liparis viridiflora</i>    | Mengla   | 720  | 20.88 | 1514.70 | 84.25 | 1146.68 | 0.76 | Epiphyte    | Dense forest | Non-endemic |
| <i>Liparis viridiflora</i>    | Mengla   | 750  | 20.70 | 1514.70 | 84.25 | 1146.68 | 0.76 | Epiphyte    | Dense forest | Non-endemic |
| <i>Liparis viridiflora</i>    | Mengla   | 800  | 20.40 | 1514.70 | 84.25 | 1146.68 | 0.76 | Epiphyte    | Forest edge  | Non-endemic |
| <i>Liparis viridiflora</i>    | Jinghong | 800  | 20.92 | 1161.08 | 80.46 | 1256.19 | 1.08 | Epiphyte    | Shrubland    | Non-endemic |
| <i>Liparis viridiflora</i>    | Jinghong | 840  | 20.68 | 1161.08 | 80.46 | 1256.19 | 1.08 | Epiphyte    | Dense forest | Non-endemic |
| <i>Liparis viridiflora</i>    | Jinghong | 840  | 20.68 | 1161.08 | 80.46 | 1256.19 | 1.08 | Epiphyte    | Shrubland    | Non-endemic |
| <i>Liparis viridiflora</i>    | Mengla   | 850  | 20.10 | 1514.70 | 84.25 | 1146.68 | 0.76 | Epiphyte    | Dense forest | Non-endemic |
| <i>Liparis viridiflora</i>    | Mengla   | 850  | 20.10 | 1514.70 | 84.25 | 1146.68 | 0.76 | Epiphyte    | Forest edge  | Non-endemic |
| <i>Liparis viridiflora</i>    | Mengla   | 880  | 19.92 | 1514.70 | 84.25 | 1146.68 | 0.76 | Epiphyte    | Dense forest | Non-endemic |
| <i>Liparis viridiflora</i>    | Xichou   | 1000 | 18.93 | 1267.54 | 82.98 | 985.97  | 0.78 | Epiphyte    | Dense forest | Non-endemic |
| <i>Liparis viridiflora</i>    | Xichou   | 1000 | 18.93 | 1267.54 | 82.98 | 985.97  | 0.78 | Epiphyte    | Dense forest | Non-endemic |
| <i>Liparis viridiflora</i>    | Malipo   | 1000 | 18.26 | 1063.54 | 85.83 | 1053.97 | 0.99 | Epiphyte    | Dense forest | Non-endemic |
| <i>Liparis viridiflora</i>    | Lushui   | 1000 | 20.05 | 1195.57 | 70.63 | 911.65  | 0.76 | Epiphyte    | Dense forest | Non-endemic |
| <i>Liparis viridiflora</i>    | Mengla   | 1000 | 19.20 | 1514.70 | 84.25 | 1146.68 | 0.76 | Epiphyte    | Dense forest | Non-endemic |
| <i>Liparis viridiflora</i>    | Mengla   | 1000 | 19.20 | 1514.70 | 84.25 | 1146.68 | 0.76 | Epiphyte    | Dense forest | Non-endemic |
| <i>Liparis viridiflora</i>    | Mengla   | 1080 | 18.72 | 1514.70 | 84.25 | 1146.68 | 0.76 | Epiphyte    | Dense forest | Non-endemic |
| <i>Liparis viridiflora</i>    | Malipo   | 1100 | 17.66 | 1063.54 | 85.83 | 1053.97 | 0.99 | Epiphyte    | Shrubland    | Non-endemic |
| <i>Liparis viridiflora</i>    | Zhenyuan | 1150 | 19.34 | 1254.48 | 77.40 | 1138.06 | 0.91 | Epiphyte    | Dense forest | Non-endemic |
| <i>Liparis viridiflora</i>    | Menghai  | 1150 | 18.66 | 1314.38 | 80.83 | 1150.91 | 0.88 | Epiphyte    | Dense forest | Non-endemic |



|                             |           |      |       |         |       |         |      |             |               |             |
|-----------------------------|-----------|------|-------|---------|-------|---------|------|-------------|---------------|-------------|
| <i>Liparis viridiflora</i>  | Mengla    | 1200 | 18.00 | 1514.70 | 84.25 | 1146.68 | 0.76 | Epiphyte    | Dense forest  | Non-endemic |
| <i>Liparis viridiflora</i>  | Mengla    | 1200 | 18.00 | 1514.70 | 84.25 | 1146.68 | 0.76 | Epiphyte    | Dense forest  | Non-endemic |
| <i>Liparis viridiflora</i>  | Menghai   | 1200 | 18.36 | 1314.38 | 80.83 | 1150.91 | 0.88 | Epiphyte    | Dense forest  | Non-endemic |
| <i>Liparis viridiflora</i>  | Xichou    | 1300 | 17.13 | 1267.54 | 82.98 | 985.97  | 0.78 | Epiphyte    | Dense forest  | Non-endemic |
| <i>Liparis viridiflora</i>  | Xichou    | 1300 | 17.13 | 1267.54 | 82.98 | 985.97  | 0.78 | Epiphyte    | Dense forest  | Non-endemic |
| <i>Liparis viridiflora</i>  | Menghai   | 1300 | 17.76 | 1314.38 | 80.83 | 1150.91 | 0.88 | Epiphyte    | Sparse forest | Non-endemic |
| <i>Liparis viridiflora</i>  | Yuxi      | 1370 | 17.55 | 928.04  | 74.41 | 1159.15 | 1.25 | Epiphyte    | Dense forest  | Non-endemic |
| <i>Liparis viridiflora</i>  | Jingdong  | 1400 | 17.18 | 1128.40 | 76.80 | 1142.11 | 1.01 | Epiphyte    | Dense forest  | Non-endemic |
| <i>Liparis viridiflora</i>  | Lincang   | 1400 | 18.12 | 1165.84 | 72.08 | 1167.73 | 1.00 | Epiphyte    | Dense forest  | Non-endemic |
| <i>Liparis viridiflora</i>  | Jinghong  | 1400 | 17.32 | 1161.08 | 80.46 | 1256.19 | 1.08 | Epiphyte    | Shrubland     | Non-endemic |
| <i>Liparis viridiflora</i>  | Xichou    | 1500 | 15.93 | 1267.54 | 82.98 | 985.97  | 0.78 | Epiphyte    | Dense forest  | Non-endemic |
| <i>Liparis viridiflora</i>  | Menghai   | 1540 | 16.32 | 1314.38 | 80.83 | 1150.91 | 0.88 | Epiphyte    | Dense forest  | Non-endemic |
| <i>Liparis viridiflora</i>  | Luxi      | 1550 | 15.78 | 1650.33 | 79.33 | 1183.39 | 0.72 | Epiphyte    | Dense forest  | Non-endemic |
| <i>Liparis viridiflora</i>  | Malipo    | 1800 | 13.46 | 1063.54 | 85.83 | 1053.97 | 0.99 | Epiphyte    | Dense forest  | Non-endemic |
| <i>Liparis viridiflora</i>  | Malipo    | 2000 | 12.26 | 1063.54 | 85.83 | 1053.97 | 0.99 | Epiphyte    | Shrubland     | Non-endemic |
| <i>Liparis viridiflora</i>  | Luchun    | 2200 | 13.50 | 2013.54 | 78.64 | 1151.56 | 0.57 | Epiphyte    | Dense forest  | Non-endemic |
| <i>Liparis viridiflora</i>  | Weixi     | 2300 | 11.63 | 970.70  | 69.95 | 1021.03 | 1.05 | Epiphyte    | Dense forest  | Non-endemic |
| <i>Listera grandiflora</i>  | Gongshan  | 2800 | 7.28  | 1738.42 | 78.47 | 860.43  | 0.50 | Terrestrial | Dense forest  | Non-endemic |
| <i>Listera grandiflora</i>  | Yongde    | 2950 | 9.43  | 1266.25 | 69.00 | 1283.63 | 1.01 | Terrestrial | Dense forest  | Non-endemic |
| <i>Listera grandiflora</i>  | Weixi     | 3000 | 7.43  | 970.70  | 69.95 | 1021.03 | 1.05 | Terrestrial | Dense forest  | Non-endemic |
| <i>Listera grandiflora</i>  | Weixi     | 3000 | 7.43  | 970.70  | 69.95 | 1021.03 | 1.05 | Terrestrial | sparse forest | Non-endemic |
| <i>Listera grandiflora</i>  | Zhongdian | 3200 | 6.24  | 641.73  | 69.05 | 914.89  | 1.43 | Terrestrial | Dense forest  | Non-endemic |
| <i>Listera grandiflora</i>  | Weixi     | 3500 | 4.43  | 970.70  | 69.95 | 1021.03 | 1.05 | Terrestrial | Dense forest  | Non-endemic |
| <i>Listera mucronata</i>    | Tengchong | 2400 | 10.60 | 1501.45 | 78.06 | 857.93  | 0.57 | Terrestrial | Meadow        | Non-endemic |
| <i>Listera nanchuanica</i>  | Daguan    | 2150 | 8.92  | 987.00  | 80.05 | 896.37  | 0.91 | Terrestrial | Sparse forest | Non-endemic |
| <i>Listera pinetorum</i>    | Gongshan  | 2300 | 10.28 | 1738.42 | 78.47 | 860.43  | 0.50 | Terrestrial | Dense forest  | Non-endemic |
| <i>Listera pinetorum</i>    | Gongshan  | 2300 | 10.28 | 1738.42 | 78.47 | 860.43  | 0.50 | Terrestrial | Dense forest  | Non-endemic |
| <i>Listera pinetorum</i>    | Gongshan  | 2500 | 9.08  | 1738.42 | 78.47 | 860.43  | 0.50 | Terrestrial | Dense forest  | Non-endemic |
| <i>Listera pinetorum</i>    | Gongshan  | 2500 | 9.08  | 1738.42 | 78.47 | 860.43  | 0.50 | Terrestrial | Grassy slope  | Non-endemic |
| <i>Listera yunnanensis</i>  | Wenshan   | 2300 | 11.86 | 988.87  | 76.70 | 1272.98 | 1.29 | Terrestrial | Dense forest  | Endemic     |
| <i>Luisia brachystachys</i> | Menghai   | 1180 | 18.48 | 1314.38 | 80.83 | 1150.91 | 0.88 | Epiphyte    | Dense forest  | Non-endemic |
| <i>Luisia filiformis</i>    | Jinping   | 350  | 23.39 | 2305.17 | 83.81 | 1030.46 | 0.45 | Epiphyte    | Dense forest  | Non-endemic |
| <i>Luisia filiformis</i>    | Jinping   | 800  | 20.69 | 2305.17 | 83.81 | 1030.46 | 0.45 | Epiphyte    | Dense forest  | Non-endemic |
| <i>Luisia filiformis</i>    | Menghai   | 1100 | 18.96 | 1314.38 | 80.83 | 1150.91 | 0.88 | Epiphyte    | Dense forest  | Non-endemic |
| <i>Luisia filiformis</i>    | Jinping   | 1750 | 14.99 | 2305.17 | 83.81 | 1030.46 | 0.45 | Epiphyte    | Dense forest  | Non-endemic |
| <i>Luisia longispica</i>    | Mengla    | 800  | 20.40 | 1514.70 | 84.25 | 1146.68 | 0.76 | Epiphyte    | Dense forest  | Endemic     |

|                            |          |      |       |         |       |         |      |             |               |             |
|----------------------------|----------|------|-------|---------|-------|---------|------|-------------|---------------|-------------|
| <i>Luisia magniflora</i>   | Menghai  | 1900 | 14.16 | 1314.38 | 80.83 | 1150.91 | 0.88 | Epiphyte    | Dense forest  | Endemic     |
| <i>Luisia morsei</i>       | Mengla   | 590  | 21.66 | 1514.70 | 84.25 | 1146.68 | 0.76 | Epiphyte    | Dense forest  | Non-endemic |
| <i>Luisia morsei</i>       | Maguan   | 800  | 20.21 | 1330.52 | 83.25 | 1086.43 | 0.82 | Epiphyte    | Dense forest  | Non-endemic |
| <i>Luisia morsei</i>       | Shizong  | 850  | 19.95 | 1204.89 | 79.59 | 1053.84 | 0.88 | Epiphyte    | Dense forest  | Non-endemic |
| <i>Luisia morsei</i>       | Cangyuan | 1200 | 18.02 | 1733.34 | 81.63 | 1060.82 | 0.61 | Epiphyte    | Dense forest  | Non-endemic |
| <i>Luisia morsei</i>       | Yongde   | 1300 | 19.33 | 1266.25 | 69.00 | 1283.63 | 1.01 | Epiphyte    | Shrubland     | Non-endemic |
| <i>Luisia terelibalia</i>  | Mengla   | 1000 | 19.20 | 1514.70 | 84.25 | 1146.68 | 0.76 | Epiphyte    | Dense forest  | Non-endemic |
| <i>Luisia teres</i>        | Yanshan  | 1200 | 18.26 | 1003.57 | 79.42 | 1172.21 | 1.17 | Epiphyte    | Dense forest  | Non-endemic |
| <i>Luisia zollingeri</i>   | Mengla   | 950  | 19.50 | 1514.70 | 84.25 | 1146.68 | 0.76 | Epiphyte    | Dense forest  | Non-endemic |
| <i>Malaxis acuminata</i>   | Jinghong | 550  | 22.42 | 1161.08 | 80.46 | 1256.19 | 1.08 | Terrestrial | Sparse forest | Non-endemic |
| <i>Malaxis acuminata</i>   | Funing   | 600  | 20.02 | 1161.58 | 79.07 | 1147.17 | 0.99 | Terrestrial | Open site     | Non-endemic |
| <i>Malaxis acuminata</i>   | Menghai  | 1600 | 15.96 | 1314.38 | 80.83 | 1150.91 | 0.88 | Terrestrial | Dense forest  | Non-endemic |
| <i>Malaxis acuminata</i>   | Menghai  | 1600 | 15.96 | 1314.38 | 80.83 | 1150.91 | 0.88 | Terrestrial | Dense forest  | Non-endemic |
| <i>Malaxis acuminata</i>   | Lushui   | 1600 | 16.45 | 1195.57 | 70.63 | 911.65  | 0.76 | Terrestrial | Grassy slope  | Non-endemic |
| <i>Malaxis acuminata</i>   | Lushui   | 1800 | 15.25 | 1195.57 | 70.63 | 911.65  | 0.76 | Terrestrial | Sparse forest | Non-endemic |
| <i>Malaxis acuminata</i>   | Fengqing | 2100 | 13.60 | 1352.80 | 73.24 | 1172.52 | 0.87 | Terrestrial | Dense forest  | Non-endemic |
| <i>Malaxis bahanensis</i>  | Eryuan   | 1870 | 15.31 | 745.16  | 68.27 | 1210.94 | 1.63 | Terrestrial | Grassy slope  | Endemic     |
| <i>Malaxis bahanensis</i>  | Lijiang  | 2250 | 13.57 | 982.53  | 63.24 | 1077.65 | 1.10 | Terrestrial | Grassy slope  | Endemic     |
| <i>Malaxis baurita</i>     | Menghai  | 1350 | 17.46 | 1314.38 | 80.83 | 1150.91 | 0.88 | Terrestrial | Dense forest  | Non-endemic |
| <i>Malaxis baurita</i>     | Gongshan | 2500 | 9.08  | 1738.42 | 78.47 | 860.43  | 0.50 | Terrestrial | Dense forest  | Non-endemic |
| <i>Malaxis calophylla</i>  | Cangyuan | 1200 | 18.02 | 1733.34 | 81.63 | 1060.82 | 0.61 | Terrestrial | Dense forest  | Non-endemic |
| <i>Malaxis khasiana</i>    | Gongshan | 1500 | 15.08 | 1738.42 | 78.47 | 860.43  | 0.50 | Terrestrial | Dense forest  | Non-endemic |
| <i>Malaxis latifolia</i>   | Pingbian | 600  | 21.22 | 1648.57 | 86.34 | 990.16  | 0.60 | Terrestrial | Dense forest  | Non-endemic |
| <i>Malaxis latifolia</i>   | Jingdong | 980  | 19.70 | 1128.40 | 76.80 | 1142.11 | 1.01 | Terrestrial | Dense forest  | Non-endemic |
| <i>Malaxis latifolia</i>   | Jinghong | 1100 | 19.12 | 1161.08 | 80.46 | 1256.19 | 1.08 | Terrestrial | Dense forest  | Non-endemic |
| <i>Malaxis latifolia</i>   | Menghai  | 1150 | 18.66 | 1314.38 | 80.83 | 1150.91 | 0.88 | Terrestrial | Open site     | Non-endemic |
| <i>Malaxis latifolia</i>   | Lincang  | 1300 | 18.72 | 1165.84 | 72.08 | 1167.73 | 1.00 | Terrestrial | Dense forest  | Non-endemic |
| <i>Malaxis latifolia</i>   | Menghai  | 1460 | 16.80 | 1314.38 | 80.83 | 1150.91 | 0.88 | Terrestrial | Dense forest  | Non-endemic |
| <i>Malaxis latifolia</i>   | Eshan    | 1500 | 16.21 | 938.39  | 78.62 | 1123.48 | 1.20 | Terrestrial | Dense forest  | Non-endemic |
| <i>Malaxis latifolia</i>   | Yongde   | 1500 | 18.13 | 1266.25 | 69.00 | 1283.63 | 1.01 | Terrestrial | Forest edge   | Non-endemic |
| <i>Malaxis latifolia</i>   | Eshan    | 1600 | 15.61 | 938.39  | 78.62 | 1123.48 | 1.20 | Terrestrial | Shrubland     | Non-endemic |
| <i>Malaxis latifolia</i>   | Yongde   | 1800 | 16.33 | 1266.25 | 69.00 | 1283.63 | 1.01 | Terrestrial | Forest edge   | Non-endemic |
| <i>Malaxis monophyllos</i> | Gongshan | 2250 | 10.58 | 1738.42 | 78.47 | 860.43  | 0.50 | Terrestrial | Dense forest  | Non-endemic |
| <i>Malaxis monophyllos</i> | Qiaojia  | 2300 | 9.82  | 878.15  | 76.01 | 1034.97 | 1.18 | Terrestrial | Grassy slope  | Non-endemic |
| <i>Malaxis monophyllos</i> | Yongde   | 2360 | 12.97 | 1266.25 | 69.00 | 1283.63 | 1.01 | Terrestrial | Grassy slope  | Non-endemic |
| <i>Malaxis monophyllos</i> | Lijiang  | 2500 | 12.07 | 982.53  | 63.24 | 1077.65 | 1.10 | Terrestrial | Dense forest  | Non-endemic |

|                            |           |      |       |         |       |         |      |             |              |             |
|----------------------------|-----------|------|-------|---------|-------|---------|------|-------------|--------------|-------------|
| <i>Malaxis monophyllos</i> | Yongde    | 2700 | 10.93 | 1266.25 | 69.00 | 1283.63 | 1.01 | Terrestrial | Grassy slope | Non-endemic |
| <i>Malaxis monophyllos</i> | Lijiang   | 2800 | 10.27 | 982.53  | 63.24 | 1077.65 | 1.10 | Terrestrial | Dense forest | Non-endemic |
| <i>Malaxis monophyllos</i> | Weixi     | 2800 | 8.63  | 970.70  | 69.95 | 1021.03 | 1.05 | Terrestrial | Dense forest | Non-endemic |
| <i>Malaxis monophyllos</i> | Lijiang   | 2800 | 10.27 | 982.53  | 63.24 | 1077.65 | 1.10 | Terrestrial | Dense forest | Non-endemic |
| <i>Malaxis monophyllos</i> | Longling  | 2800 | 7.32  | 2098.66 | 84.65 | 973.45  | 0.46 | Terrestrial | Forest edge  | Non-endemic |
| <i>Malaxis monophyllos</i> | Qiaojia   | 2800 | 6.82  | 878.15  | 76.01 | 1034.97 | 1.18 | Terrestrial | Grassy slope | Non-endemic |
| <i>Malaxis monophyllos</i> | Qiaojia   | 2830 | 6.64  | 878.15  | 76.01 | 1034.97 | 1.18 | Terrestrial | Grassy slope | Non-endemic |
| <i>Malaxis monophyllos</i> | Lijiang   | 2850 | 9.97  | 982.53  | 63.24 | 1077.65 | 1.10 | Terrestrial | Dense forest | Non-endemic |
| <i>Malaxis monophyllos</i> | Yongde    | 2980 | 9.25  | 1266.25 | 69.00 | 1283.63 | 1.01 | Terrestrial | Dense forest | Non-endemic |
| <i>Malaxis monophyllos</i> | Deqin     | 3000 | 7.17  | 639.48  | 70.85 | 896.66  | 1.40 | Terrestrial | Dense forest | Non-endemic |
| <i>Malaxis monophyllos</i> | Zhenkang  | 3000 | 6.84  | 1602.96 | 81.14 | 1089.09 | 0.68 | Terrestrial | Shrubland    | Non-endemic |
| <i>Malaxis monophyllos</i> | Zhongdian | 3100 | 6.84  | 641.73  | 69.05 | 914.89  | 1.43 | Terrestrial | Grassy slope | Non-endemic |
| <i>Malaxis monophyllos</i> | Yongde    | 3100 | 8.53  | 1266.25 | 69.00 | 1283.63 | 1.01 | Terrestrial | Meadow       | Non-endemic |
| <i>Malaxis monophyllos</i> | Zhongdian | 3100 | 6.84  | 641.73  | 69.05 | 914.89  | 1.43 | Terrestrial | Meadow       | Non-endemic |
| <i>Malaxis monophyllos</i> | Dali      | 3150 | 7.92  | 1082.70 | 68.61 | 1256.27 | 1.16 | Terrestrial | Grassy slope | Non-endemic |
| <i>Malaxis monophyllos</i> | Zhongdian | 3200 | 6.24  | 641.73  | 69.05 | 914.89  | 1.43 | Terrestrial | Dense forest | Non-endemic |
| <i>Malaxis monophyllos</i> | Deqin     | 3400 | 4.77  | 639.48  | 70.85 | 896.66  | 1.40 | Terrestrial | Grassy slope | Non-endemic |
| <i>Malaxis monophyllos</i> | Yongde    | 3410 | 6.67  | 1266.25 | 69.00 | 1283.63 | 1.01 | Terrestrial | Dense forest | Non-endemic |
| <i>Malaxis monophyllos</i> | Zhongdian | 3450 | 4.74  | 641.73  | 69.05 | 914.89  | 1.43 | Terrestrial | Grassy slope | Non-endemic |
| <i>Malaxis monophyllos</i> | Deqin     | 3450 | 4.47  | 639.48  | 70.85 | 896.66  | 1.40 | Terrestrial | Shrubland    | Non-endemic |
| <i>Malaxis monophyllos</i> | Zhenkang  | 3500 | 3.84  | 1602.96 | 81.14 | 1089.09 | 0.68 | Terrestrial | Grassy slope | Non-endemic |
| <i>Malaxis monophyllos</i> | Weixi     | 3500 | 4.43  | 970.70  | 69.95 | 1021.03 | 1.05 | Terrestrial | Grassy slope | Non-endemic |
| <i>Malaxis monophyllos</i> | Zhenkang  | 3500 | 3.84  | 1602.96 | 81.14 | 1089.09 | 0.68 | Terrestrial | Grassy slope | Non-endemic |
| <i>Malaxis monophyllos</i> | Weixi     | 3500 | 4.43  | 970.70  | 69.95 | 1021.03 | 1.05 | Terrestrial | Meadow       | Non-endemic |
| <i>Malaxis monophyllos</i> | Deqin     | 3510 | 4.11  | 639.48  | 70.85 | 896.66  | 1.40 | Terrestrial | Shrubland    | Non-endemic |
| <i>Malaxis monophyllos</i> | Weixi     | 3600 | 3.83  | 970.70  | 69.95 | 1021.03 | 1.05 | Terrestrial | Grassy slope | Non-endemic |
| <i>Malaxis monophyllos</i> | Eryuan    | 3780 | 3.85  | 745.16  | 68.27 | 1210.94 | 1.63 | Terrestrial | Grassy slope | Non-endemic |
| <i>Malaxis monophyllos</i> | Deqin     | 3800 | 2.37  | 639.48  | 70.85 | 896.66  | 1.40 | Terrestrial | Grassy slope | Non-endemic |
| <i>Malaxis monophyllos</i> | Gongshan  | 3800 | 1.28  | 1738.42 | 78.47 | 860.43  | 0.50 | Terrestrial | Grassy slope | Non-endemic |
| <i>Malaxis monophyllos</i> | Lijiang   | 3800 | 4.27  | 982.53  | 63.24 | 1077.65 | 1.10 | Terrestrial | Shrubland    | Non-endemic |
| <i>Malaxis monophyllos</i> | Zhongdian | 3950 | 1.74  | 641.73  | 69.05 | 914.89  | 1.43 | Terrestrial | Meadow       | Non-endemic |
| <i>Malaxis orbicularis</i> | Jinghong  | 1700 | 15.52 | 1161.08 | 80.46 | 1256.19 | 1.08 | Terrestrial | Dense forest | Endemic     |
| <i>Malaxis ovalisepala</i> | Mengla    | 850  | 20.10 | 1514.70 | 84.25 | 1146.68 | 0.76 | Terrestrial | Dense forest | Non-endemic |
| <i>Malaxis purpurea</i>    | Menghai   | 1300 | 17.76 | 1314.38 | 80.83 | 1150.91 | 0.88 | Terrestrial | Dense forest | Non-endemic |
| <i>Malaxis purpurea</i>    | Menghai   | 1800 | 14.76 | 1314.38 | 80.83 | 1150.91 | 0.88 | Terrestrial | Dense forest | Non-endemic |
| <i>Monomeria barbata</i>   | Malipo    | 1000 | 18.26 | 1063.54 | 85.83 | 1053.97 | 0.99 | Epiphyte    | Dense forest | Non-endemic |

|                            |           |      |       |         |       |         |      |             |              |             |
|----------------------------|-----------|------|-------|---------|-------|---------|------|-------------|--------------|-------------|
| <i>Monomeria barbata</i>   | Gongshan  | 1300 | 16.28 | 1738.42 | 78.47 | 860.43  | 0.50 | Epiphyte    | Dense forest | Non-endemic |
| <i>Monomeria barbata</i>   | Malipo    | 1500 | 15.26 | 1063.54 | 85.83 | 1053.97 | 0.99 | Epiphyte    | Dense forest | Non-endemic |
| <i>Monomeria barbata</i>   | Malipo    | 1500 | 15.26 | 1063.54 | 85.83 | 1053.97 | 0.99 | Epiphyte    | Dense forest | Non-endemic |
| <i>Myrmechis gracilis</i>  | Jingdong  | 2400 | 11.18 | 1128.40 | 76.80 | 1142.11 | 1.01 | Terrestrial | Dense forest | Non-endemic |
| <i>Myrmechis japonica</i>  | Gongshan  | 2600 | 8.48  | 1738.42 | 78.47 | 860.43  | 0.50 | Epiphyte    | Dense forest | Non-endemic |
| <i>Myrmechis japonica</i>  | Yongde    | 2900 | 9.73  | 1266.25 | 69.00 | 1283.63 | 1.01 | Epiphyte    | Dense forest | Non-endemic |
| <i>Myrmechis japonica</i>  | Yongde    | 2950 | 9.43  | 1266.25 | 69.00 | 1283.63 | 1.01 | Epiphyte    | Dense forest | Non-endemic |
| <i>Myrmechis pumila</i>    | Jingdong  | 2430 | 11.00 | 1128.40 | 76.80 | 1142.11 | 1.01 | Terrestrial | Dense forest | Non-endemic |
| <i>Myrmechis urceolata</i> | Pingbian  | 2200 | 11.62 | 1648.57 | 86.34 | 990.16  | 0.60 | Terrestrial | Dense forest | Non-endemic |
| <i>Myrmechis urceolata</i> | Qiaojia   | 2300 | 9.82  | 878.15  | 76.01 | 1034.97 | 1.18 | Terrestrial | Dense forest | Non-endemic |
| <i>Myrmechis urceolata</i> | Yongde    | 3060 | 8.77  | 1266.25 | 69.00 | 1283.63 | 1.01 | Terrestrial | Grassy slope | Non-endemic |
| <i>Myrmechis urceolata</i> | Zhongdian | 3200 | 6.24  | 641.73  | 69.05 | 914.89  | 1.43 | Terrestrial | Grassy slope | Non-endemic |
| <i>Neogyna gardneriana</i> | Malipo    | 1600 | 14.66 | 1063.54 | 85.83 | 1053.97 | 0.99 | Epiphyte    | Dense forest | Non-endemic |
| <i>Neogyna gardneriana</i> | Luchun    | 1600 | 17.10 | 2013.54 | 78.64 | 1151.56 | 0.57 | Epiphyte    | Dense forest | Non-endemic |
| <i>Neogyna gardneriana</i> | Lincang   | 1700 | 16.32 | 1165.84 | 72.08 | 1167.73 | 1.00 | Epiphyte    | Dense forest | Non-endemic |
| <i>Neogyna gardneriana</i> | Longling  | 1700 | 13.92 | 2098.66 | 84.65 | 973.45  | 0.46 | Epiphyte    | Dense forest | Non-endemic |
| <i>Neogyna gardneriana</i> | Jingdong  | 1700 | 15.38 | 1128.40 | 76.80 | 1142.11 | 1.01 | Epiphyte    | Dense forest | Non-endemic |
| <i>Neogyna gardneriana</i> | Hekou     | 1900 | 12.35 | 1768.58 | 84.25 | 1166.26 | 0.66 | Epiphyte    | Dense forest | Non-endemic |
| <i>Neogyna gardneriana</i> | Jingdong  | 2000 | 13.58 | 1128.40 | 76.80 | 1142.11 | 1.01 | Epiphyte    | Dense forest | Non-endemic |
| <i>Neogyna gardneriana</i> | Jingdong  | 2200 | 12.38 | 1128.40 | 76.80 | 1142.11 | 1.01 | Epiphyte    | Open site    | Non-endemic |
| <i>Neottia acuminata</i>   | Gongshan  | 2350 | 9.98  | 1738.42 | 78.47 | 860.43  | 0.50 | Saprophyte  | Dense forest | Non-endemic |
| <i>Neottia acuminata</i>   | Gongshan  | 2800 | 7.28  | 1738.42 | 78.47 | 860.43  | 0.50 | Saprophyte  | Dense forest | Non-endemic |
| <i>Neottia acuminata</i>   | Heqing    | 3000 | 8.79  | 977.00  | 65.16 | 1211.84 | 1.24 | Saprophyte  | Dense forest | Non-endemic |
| <i>Neottia acuminata</i>   | Lijiang   | 3000 | 9.07  | 982.53  | 63.24 | 1077.65 | 1.10 | Saprophyte  | Grassy slope | Non-endemic |
| <i>Neottia acuminata</i>   | Zhongdian | 3440 | 4.80  | 641.73  | 69.05 | 914.89  | 1.43 | Saprophyte  | Dense forest | Non-endemic |
| <i>Neottia acuminata</i>   | Zhongdian | 3850 | 2.34  | 641.73  | 69.05 | 914.89  | 1.43 | Saprophyte  | Dense forest | Non-endemic |
| <i>Neottia acuminata</i>   | Zhongdian | 3960 | 1.68  | 641.73  | 69.05 | 914.89  | 1.43 | Saprophyte  | Dense forest | Non-endemic |
| <i>Neottia acuminata</i>   | Zhongdian | 4000 | 1.44  | 641.73  | 69.05 | 914.89  | 1.43 | Saprophyte  | Dense forest | Non-endemic |
| <i>Neottia acuminata</i>   | Zhongdian | 4100 | 0.84  | 641.73  | 69.05 | 914.89  | 1.43 | Saprophyte  | Dense forest | Non-endemic |
| <i>Neottia listeroides</i> | Zhongdian | 2800 | 8.64  | 641.73  | 69.05 | 914.89  | 1.43 | Saprophyte  | Dense forest | Non-endemic |
| <i>Neottia listeroides</i> | Gongshan  | 3500 | 3.08  | 1738.42 | 78.47 | 860.43  | 0.50 | Saprophyte  | Dense forest | Non-endemic |
| <i>Neottia megalochila</i> | Lijiang   | 3250 | 7.57  | 982.53  | 63.24 | 1077.65 | 1.10 | Saprophyte  | Grassy slope | Non-endemic |
| <i>Neottia megalochila</i> | Lijiang   | 3300 | 7.27  | 982.53  | 63.24 | 1077.65 | 1.10 | Saprophyte  | Dense forest | Non-endemic |
| <i>Neottia megalochila</i> | Zhongdian | 3400 | 5.04  | 641.73  | 69.05 | 914.89  | 1.43 | Saprophyte  | Dense forest | Non-endemic |
| <i>Neottia megalochila</i> | Gongshan  | 3500 | 3.08  | 1738.42 | 78.47 | 860.43  | 0.50 | Saprophyte  | Dense forest | Non-endemic |
| <i>Neottia megalochila</i> | Lijiang   | 3800 | 4.27  | 982.53  | 63.24 | 1077.65 | 1.10 | Saprophyte  | Meadow       | Non-endemic |

|                                                 |           |      |       |         |       |         |      |             |               |             |
|-------------------------------------------------|-----------|------|-------|---------|-------|---------|------|-------------|---------------|-------------|
| <i>Neottia megalochila</i>                      | Zhongdian | 3900 | 2.04  | 641.73  | 69.05 | 914.89  | 1.43 | Saprophyte  | Open site     | Non-endemic |
| <i>Neottianthe calcicola</i>                    | Deqin     | 3000 | 7.17  | 639.48  | 70.85 | 896.66  | 1.40 | Terrestrial | Dense forest  | Non-endemic |
| <i>Neottianthe calcicola</i>                    | Zhongdian | 3100 | 6.84  | 641.73  | 69.05 | 914.89  | 1.43 | Terrestrial | Forest edge   | Non-endemic |
| <i>Neottianthe calcicola</i>                    | Lijiang   | 3170 | 8.05  | 982.53  | 63.24 | 1077.65 | 1.10 | Terrestrial | Open site     | Non-endemic |
| <i>Neottianthe calcicola</i>                    | Heqing    | 3300 | 6.99  | 977.00  | 65.16 | 1211.84 | 1.24 | Terrestrial | Sparse forest | Non-endemic |
| <i>Neottianthe calcicola</i>                    | Heqing    | 3400 | 6.39  | 977.00  | 65.16 | 1211.84 | 1.24 | Terrestrial | Sparse forest | Non-endemic |
| <i>Neottianthe calcicola</i>                    | Zhongdian | 3470 | 4.62  | 641.73  | 69.05 | 914.89  | 1.43 | Terrestrial | Grassy slope  | Non-endemic |
| <i>Neottianthe calcicola</i>                    | Zhongdian | 3500 | 4.44  | 641.73  | 69.05 | 914.89  | 1.43 | Terrestrial | Grassy slope  | Non-endemic |
| <i>Neottianthe calcicola</i>                    | Zhongdian | 3600 | 3.84  | 641.73  | 69.05 | 914.89  | 1.43 | Terrestrial | Meadow        | Non-endemic |
| <i>Neottianthe calcicola</i>                    | Zhongdian | 3700 | 3.24  | 641.73  | 69.05 | 914.89  | 1.43 | Terrestrial | Forest edge   | Non-endemic |
| <i>Neottianthe calcicola</i>                    | Heqing    | 3800 | 3.99  | 977.00  | 65.16 | 1211.84 | 1.24 | Terrestrial | Grassy slope  | Non-endemic |
| <i>Neottianthe calcicola</i>                    | Zhongdian | 3800 | 2.64  | 641.73  | 69.05 | 914.89  | 1.43 | Terrestrial | Meadow        | Non-endemic |
| <i>Neottianthe camptoceras</i>                  | Baoshan   | 3100 | 7.16  | 992.38  | 73.87 | 1160.15 | 1.17 | Terrestrial | Dense forest  | Non-endemic |
| <i>Neottianthe cucullata</i>                    | Deqin     | 3400 | 4.77  | 639.48  | 70.85 | 896.66  | 1.40 | Terrestrial | Shrubland     | Non-endemic |
| <i>Neottianthe gymnadeninoides</i>              | Deqin     | 3000 | 7.17  | 639.48  | 70.85 | 896.66  | 1.40 | Terrestrial | Dense forest  | Non-endemic |
| <i>Neottianthe luteola</i>                      | Gongshan  | 3000 | 6.08  | 1738.42 | 78.47 | 860.43  | 0.50 | Terrestrial | Grassy slope  | Endemic     |
| <i>Neottianthe monophylla</i>                   | Lijiang   | 2600 | 11.47 | 982.53  | 63.24 | 1077.65 | 1.10 | Terrestrial | Dense forest  | Non-endemic |
| <i>Neottianthe oblonga</i>                      | Zhongdian | 3100 | 6.84  | 641.73  | 69.05 | 914.89  | 1.43 | Terrestrial | Forest edge   | Non-endemic |
| <i>Neottianthe secundiflora</i>                 | Heqing    | 3400 | 6.39  | 977.00  | 65.16 | 1211.84 | 1.24 | Terrestrial | Grassy slope  | Non-endemic |
| <i>Nervilia aragoana</i>                        | Luquan    | 1960 | 13.96 | 965.09  | 73.60 | 1160.89 | 1.20 | Terrestrial | Shrubland     | Non-endemic |
| <i>Nervilia aragoana</i>                        | Luquan    | 2300 | 11.92 | 965.09  | 73.60 | 1160.89 | 1.20 | Terrestrial | Shrubland     | Non-endemic |
| <i>Nervilia fordii</i>                          | Hekou     | 1950 | 12.05 | 1768.58 | 84.25 | 1166.26 | 0.66 | Terrestrial | Forest edge   | Non-endemic |
| <i>Nervilia mackinnonii</i>                     | Luoping   | 1350 | 15.94 | 1686.24 | 82.51 | 1040.03 | 0.62 | Terrestrial | Dense forest  | Non-endemic |
| <i>Nervilia mackinnonii</i>                     | Xichou    | 1650 | 15.03 | 1267.54 | 82.98 | 985.97  | 0.78 | Terrestrial | Dense forest  | Non-endemic |
| <i>Nervilia plicata</i>                         | Jinghong  | 650  | 21.82 | 1161.08 | 80.46 | 1256.19 | 1.08 | Terrestrial | Dense forest  | Non-endemic |
| <i>Nervilia plicata</i>                         | Jinghong  | 650  | 21.82 | 1161.08 | 80.46 | 1256.19 | 1.08 | Terrestrial | Dense forest  | Non-endemic |
| <i>Nervilia plicata</i>                         | Menghai   | 1000 | 19.56 | 1314.38 | 80.83 | 1150.91 | 0.88 | Terrestrial | Shrubland     | Non-endemic |
| <i>Nervilia plicata</i>                         | Jingdong  | 1100 | 18.98 | 1128.40 | 76.80 | 1142.11 | 1.01 | Terrestrial | Dense forest  | Non-endemic |
| <i>Nervilia aragoana</i> Gaud.                  | Luquan    | 1960 | 13.96 | 965.09  | 73.60 | 1160.89 | 1.20 | Terrestrial | Grassy slope  | Non-endemic |
| <i>Oberonia acaulis</i>                         | Luchun    | 1580 | 17.22 | 2013.54 | 78.64 | 1151.56 | 0.57 | Epiphyte    | Dense forest  | Non-endemic |
| <i>Oberonia acaulis</i> var. <i>luchunensis</i> | Dali      | 2100 | 14.22 | 1082.70 | 68.61 | 1256.27 | 1.16 | Epiphyte    | Dense forest  | Endemic     |
| <i>Oberonia acaulis</i> var. <i>luchunensis</i> | Luchun    | 2400 | 12.30 | 2013.54 | 78.64 | 1151.56 | 0.57 | Epiphyte    | Forest edge   | Endemic     |
| <i>Oberonia caulescens</i>                      | Xichou    | 1200 | 17.73 | 1267.54 | 82.98 | 985.97  | 0.78 | Epiphyte    | Dense forest  | Non-endemic |
| <i>Oberonia caulescens</i>                      | Yanshan   | 1200 | 18.26 | 1003.57 | 79.42 | 1172.21 | 1.17 | Epiphyte    | Dense forest  | Non-endemic |
| <i>Oberonia caulescens</i>                      | Pingbian  | 1600 | 15.22 | 1648.57 | 86.34 | 990.16  | 0.60 | Epiphyte    | Dense forest  | Non-endemic |
| <i>Oberonia caulescens</i>                      | Luxi      | 1750 | 14.58 | 1650.33 | 79.33 | 1183.39 | 0.72 | Epiphyte    | Dense forest  | Non-endemic |

|                            |          |      |       |         |       |         |      |          |               |             |
|----------------------------|----------|------|-------|---------|-------|---------|------|----------|---------------|-------------|
| <i>Oberonia caulescens</i> | Wenshan  | 1750 | 15.16 | 988.87  | 76.70 | 1272.98 | 1.29 | Epiphyte | Dense forest  | Non-endemic |
| <i>Oberonia caulescens</i> | Menghai  | 1800 | 14.76 | 1314.38 | 80.83 | 1150.91 | 0.88 | Epiphyte | Dense forest  | Non-endemic |
| <i>Oberonia caulescens</i> | Mengzi   | 1800 | 15.66 | 855.35  | 71.82 | 1434.56 | 1.68 | Epiphyte | Shrubland     | Non-endemic |
| <i>Oberonia caulescens</i> | Gongshan | 1900 | 12.68 | 1738.42 | 78.47 | 860.43  | 0.50 | Epiphyte | Dense forest  | Non-endemic |
| <i>Oberonia caulescens</i> | Gongshan | 2000 | 12.08 | 1738.42 | 78.47 | 860.43  | 0.50 | Epiphyte | Dense forest  | Non-endemic |
| <i>Oberonia caulescens</i> | Eshan    | 2000 | 13.21 | 938.39  | 78.62 | 1123.48 | 1.20 | Epiphyte | Shrubland     | Non-endemic |
| <i>Oberonia caulescens</i> | Jingdong | 2100 | 12.98 | 1128.40 | 76.80 | 1142.11 | 1.01 | Epiphyte | Dense forest  | Non-endemic |
| <i>Oberonia caulescens</i> | Jingdong | 2200 | 12.38 | 1128.40 | 76.80 | 1142.11 | 1.01 | Epiphyte | Dense forest  | Non-endemic |
| <i>Oberonia caulescens</i> | Fengqing | 2400 | 11.80 | 1352.80 | 73.24 | 1172.52 | 0.87 | Epiphyte | Dense forest  | Non-endemic |
| <i>Oberonia caulescens</i> | Lushui   | 2500 | 11.05 | 1195.57 | 70.63 | 911.65  | 0.76 | Epiphyte | Dense forest  | Non-endemic |
| <i>Oberonia caulescens</i> | Jingdong | 2600 | 9.98  | 1128.40 | 76.80 | 1142.11 | 1.01 | Epiphyte | Dense forest  | Non-endemic |
| <i>Oberonia caulescens</i> | Deqin    | 2700 | 8.97  | 639.48  | 70.85 | 896.66  | 1.40 | Epiphyte | Shrubland     | Non-endemic |
| <i>Oberonia ensiformis</i> | Mengla   | 720  | 20.88 | 1514.70 | 84.25 | 1146.68 | 0.76 | Epiphyte | Dense forest  | Non-endemic |
| <i>Oberonia ensiformis</i> | Mengla   | 750  | 20.70 | 1514.70 | 84.25 | 1146.68 | 0.76 | Epiphyte | Dense forest  | Non-endemic |
| <i>Oberonia ensiformis</i> | Jinping  | 800  | 20.69 | 2305.17 | 83.81 | 1030.46 | 0.45 | Epiphyte | Dense forest  | Non-endemic |
| <i>Oberonia ensiformis</i> | Jinghong | 950  | 20.02 | 1161.08 | 80.46 | 1256.19 | 1.08 | Epiphyte | Dense forest  | Non-endemic |
| <i>Oberonia ensiformis</i> | Jinghong | 1000 | 19.72 | 1161.08 | 80.46 | 1256.19 | 1.08 | Epiphyte | Shrubland     | Non-endemic |
| <i>Oberonia ensiformis</i> | Mengla   | 1100 | 18.60 | 1514.70 | 84.25 | 1146.68 | 0.76 | Epiphyte | Dense forest  | Non-endemic |
| <i>Oberonia ensiformis</i> | Mengla   | 1100 | 18.60 | 1514.70 | 84.25 | 1146.68 | 0.76 | Epiphyte | Dense forest  | Non-endemic |
| <i>Oberonia ensiformis</i> | Jinghong | 1150 | 18.82 | 1161.08 | 80.46 | 1256.19 | 1.08 | Epiphyte | Dense forest  | Non-endemic |
| <i>Oberonia ensiformis</i> | Jinghong | 1150 | 18.82 | 1161.08 | 80.46 | 1256.19 | 1.08 | Epiphyte | Dense forest  | Non-endemic |
| <i>Oberonia ensiformis</i> | Malipo   | 1150 | 17.36 | 1063.54 | 85.83 | 1053.97 | 0.99 | Epiphyte | Dense forest  | Non-endemic |
| <i>Oberonia ensiformis</i> | Jinghong | 1200 | 18.52 | 1161.08 | 80.46 | 1256.19 | 1.08 | Epiphyte | Dense forest  | Non-endemic |
| <i>Oberonia ensiformis</i> | Jinghong | 1200 | 18.52 | 1161.08 | 80.46 | 1256.19 | 1.08 | Epiphyte | Dense forest  | Non-endemic |
| <i>Oberonia ensiformis</i> | Menghai  | 1500 | 16.56 | 1314.38 | 80.83 | 1150.91 | 0.88 | Epiphyte | Dense forest  | Non-endemic |
| <i>Oberonia falconeri</i>  | Jinghong | 670  | 21.70 | 1161.08 | 80.46 | 1256.19 | 1.08 | Epiphyte | Sparse forest | Non-endemic |
| <i>Oberonia falconeri</i>  | Xichou   | 700  | 20.73 | 1267.54 | 82.98 | 985.97  | 0.78 | Epiphyte | Dense forest  | Non-endemic |
| <i>Oberonia falconeri</i>  | Jinghong | 860  | 20.56 | 1161.08 | 80.46 | 1256.19 | 1.08 | Epiphyte | Dense forest  | Non-endemic |
| <i>Oberonia falconeri</i>  | Mengla   | 860  | 20.04 | 1514.70 | 84.25 | 1146.68 | 0.76 | Epiphyte | Sparse forest | Non-endemic |
| <i>Oberonia falconeri</i>  | Jinghong | 910  | 20.26 | 1161.08 | 80.46 | 1256.19 | 1.08 | Epiphyte | Dense forest  | Non-endemic |
| <i>Oberonia falconeri</i>  | Jinghong | 950  | 20.02 | 1161.08 | 80.46 | 1256.19 | 1.08 | Epiphyte | Shrubland     | Non-endemic |
| <i>Oberonia falconeri</i>  | Jinghong | 1020 | 19.60 | 1161.08 | 80.46 | 1256.19 | 1.08 | Epiphyte | Dense forest  | Non-endemic |
| <i>Oberonia falconeri</i>  | Jinghong | 1150 | 18.82 | 1161.08 | 80.46 | 1256.19 | 1.08 | Epiphyte | Dense forest  | Non-endemic |
| <i>Oberonia falconeri</i>  | Mengla   | 1500 | 16.20 | 1514.70 | 84.25 | 1146.68 | 0.76 | Epiphyte | Dense forest  | Non-endemic |
| <i>Oberonia falconeri</i>  | Longling | 2500 | 9.12  | 2098.66 | 84.65 | 973.45  | 0.46 | Epiphyte | Dense forest  | Non-endemic |
| <i>Oberonia gammiei</i>    | Jinghong | 860  | 20.56 | 1161.08 | 80.46 | 1256.19 | 1.08 | Epiphyte | Dense forest  | Non-endemic |

|                               |           |      |       |         |       |         |      |             |               |             |
|-------------------------------|-----------|------|-------|---------|-------|---------|------|-------------|---------------|-------------|
| <i>Oberonia integerrima</i>   | Yongde    | 1600 | 17.53 | 1266.25 | 69.00 | 1283.63 | 1.01 | Epiphyte    | Dense forest  | Non-endemic |
| <i>Oberonia iridifolia</i>    | Yingjiang | 1300 | 16.59 | 1505.33 | 79.98 | 1158.19 | 0.77 | Epiphyte    | Dense forest  | Non-endemic |
| <i>Oberonia jenkinsiana</i>   | Menghai   | 1100 | 18.96 | 1314.38 | 80.83 | 1150.91 | 0.88 | Epiphyte    | Sparse forest | Non-endemic |
| <i>Oberonia jenkinsiana</i>   | Gongshan  | 1300 | 16.28 | 1738.42 | 78.47 | 860.43  | 0.50 | Epiphyte    | Dense forest  | Non-endemic |
| <i>Oberonia jenkinsiana</i>   | Menghai   | 1300 | 17.76 | 1314.38 | 80.83 | 1150.91 | 0.88 | Epiphyte    | Sparse forest | Non-endemic |
| <i>Oberonia jenkinsiana</i>   | Jinghong  | 1500 | 16.72 | 1161.08 | 80.46 | 1256.19 | 1.08 | Epiphyte    | Dense forest  | Non-endemic |
| <i>Oberonia jenkinsiana</i>   | Pingbian  | 1500 | 15.82 | 1648.57 | 86.34 | 990.16  | 0.60 | Epiphyte    | Dense forest  | Non-endemic |
| <i>Oberonia jenkinsiana</i>   | Menghai   | 1520 | 16.44 | 1314.38 | 80.83 | 1150.91 | 0.88 | Epiphyte    | Dense forest  | Non-endemic |
| <i>Oberonia jenkinsiana</i>   | Menghai   | 1530 | 16.38 | 1314.38 | 80.83 | 1150.91 | 0.88 | Epiphyte    | Dense forest  | Non-endemic |
| <i>Oberonia jenkinsiana</i>   | Yongde    | 1600 | 17.53 | 1266.25 | 69.00 | 1283.63 | 1.01 | Epiphyte    | Dense forest  | Non-endemic |
| <i>Oberonia jenkinsiana</i>   | Jingdong  | 1700 | 15.38 | 1128.40 | 76.80 | 1142.11 | 1.01 | Epiphyte    | Dense forest  | Non-endemic |
| <i>Oberonia jenkinsiana</i>   | Luchun    | 1760 | 16.14 | 2013.54 | 78.64 | 1151.56 | 0.57 | Epiphyte    | Dense forest  | Non-endemic |
| <i>Oberonia jenkinsiana</i>   | Gongshan  | 2100 | 11.48 | 1738.42 | 78.47 | 860.43  | 0.50 | Epiphyte    | Dense forest  | Non-endemic |
| <i>Oberonia jenkinsiana</i>   | Tengchong | 2300 | 11.20 | 1501.45 | 78.06 | 857.93  | 0.57 | Epiphyte    | Dense forest  | Non-endemic |
| <i>Oberonia jenkinsiana</i>   | Zhenkang  | 2700 | 8.64  | 1602.96 | 81.14 | 1089.09 | 0.68 | Epiphyte    | Dense forest  | Non-endemic |
| <i>Oberonia kwangsiensis</i>  | Malipo    | 1150 | 17.36 | 1063.54 | 85.83 | 1053.97 | 0.99 | Epiphyte    | Dense forest  | Non-endemic |
| <i>Oberonia latipetala</i>    | Lancang   | 1500 | 16.70 | 1596.50 | 77.88 | 1183.80 | 0.74 | Epiphyte    | Dense forest  | Endemic     |
| <i>Oberonia latipetala</i>    | Jingdong  | 1800 | 14.78 | 1128.40 | 76.80 | 1142.11 | 1.01 | Epiphyte    | Dense forest  | Endemic     |
| <i>Oberonia latipetala</i>    | Jingdong  | 1800 | 14.78 | 1128.40 | 76.80 | 1142.11 | 1.01 | Epiphyte    | Dense forest  | Endemic     |
| <i>Oberonia latipetala</i>    | Gongshan  | 1900 | 12.68 | 1738.42 | 78.47 | 860.43  | 0.50 | Epiphyte    | Dense forest  | Endemic     |
| <i>Oberonia latipetala</i>    | Jingdong  | 1950 | 13.88 | 1128.40 | 76.80 | 1142.11 | 1.01 | Epiphyte    | Dense forest  | Endemic     |
| <i>Oberonia latipetala</i>    | Jingdong  | 2100 | 12.98 | 1128.40 | 76.80 | 1142.11 | 1.01 | Epiphyte    | Dense forest  | Endemic     |
| <i>Oberonia latipetala</i>    | Jingdong  | 2400 | 11.18 | 1128.40 | 76.80 | 1142.11 | 1.01 | Epiphyte    | Dense forest  | Endemic     |
| <i>Oberonia mannii</i>        | Pingbian  | 1600 | 15.22 | 1648.57 | 86.34 | 990.16  | 0.60 | Epiphyte    | Dense forest  | Non-endemic |
| <i>Oberonia menghaiensis</i>  | Menghai   | 1800 | 14.76 | 1314.38 | 80.83 | 1150.91 | 0.88 | Epiphyte    | Dense forest  | Endemic     |
| <i>Oberonia menglaensis</i>   | Mengla    | 750  | 20.70 | 1514.70 | 84.25 | 1146.68 | 0.76 | Epiphyte    | Dense forest  | Endemic     |
| <i>Oberonia myosurus</i>      | Yanshan   | 1200 | 18.26 | 1003.57 | 79.42 | 1172.21 | 1.17 | Epiphyte    | Dense forest  | Non-endemic |
| <i>Oberonia myosurus</i>      | Menghai   | 1500 | 16.56 | 1314.38 | 80.83 | 1150.91 | 0.88 | Epiphyte    | Shrubland     | Non-endemic |
| <i>Oberonia myosurus</i>      | Xichou    | 1540 | 15.69 | 1267.54 | 82.98 | 985.97  | 0.78 | Epiphyte    | Dense forest  | Non-endemic |
| <i>Oberonia pachyrachis</i>   | Yongde    | 1900 | 15.73 | 1266.25 | 69.00 | 1283.63 | 1.01 | Epiphyte    | Sparse forest | Non-endemic |
| <i>Oberonia pachyrachis</i>   | Lancang   | 2100 | 13.10 | 1596.50 | 77.88 | 1183.80 | 0.74 | Epiphyte    | Dense forest  | Non-endemic |
| <i>Oberonia pyrulifera</i>    | Fengqing  | 1700 | 16.00 | 1352.80 | 73.24 | 1172.52 | 0.87 | Epiphyte    | Dense forest  | Non-endemic |
| <i>Oberonia pyrulifera</i>    | Fengqing  | 2100 | 13.60 | 1352.80 | 73.24 | 1172.52 | 0.87 | Epiphyte    | Dense forest  | Non-endemic |
| <i>Oberonia pyrulifera</i>    | Zhenkang  | 2300 | 11.04 | 1602.96 | 81.14 | 1089.09 | 0.68 | Epiphyte    | Dense forest  | Non-endemic |
| <i>Orchis brevicealcarata</i> | Dali      | 2700 | 10.62 | 1082.70 | 68.61 | 1256.27 | 1.16 | Epiphyte    | Dense forest  | Non-endemic |
| <i>Orchis brevicealcarata</i> | Dali      | 1500 | 17.82 | 1082.70 | 68.61 | 1256.27 | 1.16 | Terrestrial | Grassy slope  | Non-endemic |

|                               |           |      |       |         |       |         |      |             |               |             |
|-------------------------------|-----------|------|-------|---------|-------|---------|------|-------------|---------------|-------------|
| <i>Orchis brevicealcarata</i> | Dali      | 2350 | 12.72 | 1082.70 | 68.61 | 1256.27 | 1.16 | Terrestrial | Grassy slope  | Non-endemic |
| <i>Orchis brevicealcarata</i> | Lijiang   | 2500 | 12.07 | 982.53  | 63.24 | 1077.65 | 1.10 | Terrestrial | Dense forest  | Non-endemic |
| <i>Orchis brevicealcarata</i> | Yangbi    | 2500 | 10.99 | 1044.23 | 72.19 | 1161.15 | 1.11 | Terrestrial | Dense forest  | Non-endemic |
| <i>Orchis brevicealcarata</i> | Dali      | 2600 | 11.22 | 1082.70 | 68.61 | 1256.27 | 1.16 | Terrestrial | Grassy slope  | Non-endemic |
| <i>Orchis brevicealcarata</i> | Lijiang   | 2700 | 10.87 | 982.53  | 63.24 | 1077.65 | 1.10 | Terrestrial | Grassy slope  | Non-endemic |
| <i>Orchis brevicealcarata</i> | Binchuan  | 2900 | 9.30  | 573.87  | 62.93 | 1418.42 | 2.47 | Terrestrial | Meadow        | Non-endemic |
| <i>Orchis brevicealcarata</i> | Lijiang   | 3100 | 8.47  | 982.53  | 63.24 | 1077.65 | 1.10 | Terrestrial | Dense forest  | Non-endemic |
| <i>Orchis brevicealcarata</i> | Dayao     | 3200 | 7.73  | 810.80  | 65.01 | 1427.38 | 1.76 | Terrestrial | Dense forest  | Non-endemic |
| <i>Orchis brevicealcarata</i> | Lijiang   | 3200 | 7.87  | 982.53  | 63.24 | 1077.65 | 1.10 | Terrestrial | Grassy slope  | Non-endemic |
| <i>Orchis brevicealcarata</i> | Lijiang   | 3300 | 7.27  | 982.53  | 63.24 | 1077.65 | 1.10 | Terrestrial | Sparse forest | Non-endemic |
| <i>Orchis brevicealcarata</i> | Zhongdian | 3500 | 4.44  | 641.73  | 69.05 | 914.89  | 1.43 | Terrestrial | Grassy slope  | Non-endemic |
| <i>Orchis chrysea</i>         | Gongshan  | 3400 | 3.68  | 1738.42 | 78.47 | 860.43  | 0.50 | Epiphyte    | Forest edge   | Non-endemic |
| <i>Orchis chrysea</i>         | Gongshan  | 3800 | 1.28  | 1738.42 | 78.47 | 860.43  | 0.50 | Terrestrial | Meadow        | Non-endemic |
| <i>Orchis chusua</i>          | Luchun    | 850  | 21.60 | 2013.54 | 78.64 | 1151.56 | 0.57 | Terrestrial | Dense forest  | Non-endemic |
| <i>Orchis chusua</i>          | Daguan    | 1200 | 14.62 | 987.00  | 80.05 | 896.37  | 0.91 | Terrestrial | Dense forest  | Non-endemic |
| <i>Orchis chusua</i>          | Weixi     | 1850 | 14.33 | 970.70  | 69.95 | 1021.03 | 1.05 | Terrestrial | Grassy slope  | Non-endemic |
| <i>Orchis chusua</i>          | Kunming   | 1900 | 14.88 | 1019.14 | 72.30 | 1197.62 | 1.18 | Terrestrial | Grassy slope  | Non-endemic |
| <i>Orchis chusua</i>          | Lijiang   | 2000 | 15.07 | 982.53  | 63.24 | 1077.65 | 1.10 | Terrestrial | Meadow        | Non-endemic |
| <i>Orchis chusua</i>          | Yongde    | 2010 | 15.07 | 1266.25 | 69.00 | 1283.63 | 1.01 | Terrestrial | Dense forest  | Non-endemic |
| <i>Orchis chusua</i>          | Kunming   | 2100 | 13.68 | 1019.14 | 72.30 | 1197.62 | 1.18 | Terrestrial | Grassy slope  | Non-endemic |
| <i>Orchis chusua</i>          | Dali      | 2230 | 13.44 | 1082.70 | 68.61 | 1256.27 | 1.16 | Terrestrial | Dense forest  | Non-endemic |
| <i>Orchis chusua</i>          | Eryuan    | 2230 | 13.15 | 745.16  | 68.27 | 1210.94 | 1.63 | Terrestrial | Grassy slope  | Non-endemic |
| <i>Orchis chusua</i>          | Eryuan    | 2300 | 12.73 | 745.16  | 68.27 | 1210.94 | 1.63 | Terrestrial | Sparse forest | Non-endemic |
| <i>Orchis chusua</i>          | Yunlong   | 2450 | 11.35 | 1195.57 | 70.63 | 911.65  | 0.76 | Terrestrial | Shrubland     | Non-endemic |
| <i>Orchis chusua</i>          | Lijiang   | 2500 | 12.07 | 982.53  | 63.24 | 1077.65 | 1.10 | Terrestrial | Grassy slope  | Non-endemic |
| <i>Orchis chusua</i>          | Lijiang   | 2500 | 12.07 | 982.53  | 63.24 | 1077.65 | 1.10 | Terrestrial | Grassy slope  | Non-endemic |
| <i>Orchis chusua</i>          | Lijiang   | 2500 | 12.07 | 982.53  | 63.24 | 1077.65 | 1.10 | Terrestrial | Meadow        | Non-endemic |
| <i>Orchis chusua</i>          | Gongshan  | 2500 | 9.08  | 1738.42 | 78.47 | 860.43  | 0.50 | Terrestrial | Meadow        | Non-endemic |
| <i>Orchis chusua</i>          | Lijiang   | 2560 | 11.71 | 982.53  | 63.24 | 1077.65 | 1.10 | Terrestrial | Dense forest  | Non-endemic |
| <i>Orchis chusua</i>          | Heqing    | 2600 | 11.19 | 977.00  | 65.16 | 1211.84 | 1.24 | Terrestrial | Dense forest  | Non-endemic |
| <i>Orchis chusua</i>          | Dali      | 2600 | 11.22 | 1082.70 | 68.61 | 1256.27 | 1.16 | Terrestrial | Grassy slope  | Non-endemic |
| <i>Orchis chusua</i>          | Lijiang   | 2600 | 11.47 | 982.53  | 63.24 | 1077.65 | 1.10 | Terrestrial | Meadow        | Non-endemic |
| <i>Orchis chusua</i>          | Zhongdian | 2650 | 9.54  | 641.73  | 69.05 | 914.89  | 1.43 | Terrestrial | Meadow        | Non-endemic |
| <i>Orchis chusua</i>          | Deqin     | 2700 | 8.97  | 639.48  | 70.85 | 896.66  | 1.40 | Terrestrial | Grassy slope  | Non-endemic |
| <i>Orchis chusua</i>          | Lijiang   | 2700 | 10.87 | 982.53  | 63.24 | 1077.65 | 1.10 | Terrestrial | Shrubland     | Non-endemic |
| <i>Orchis chusua</i>          | Gongshan  | 2800 | 7.28  | 1738.42 | 78.47 | 860.43  | 0.50 | Terrestrial | Dense forest  | Non-endemic |



|                      |           |      |       |         |       |         |      |             |               |             |
|----------------------|-----------|------|-------|---------|-------|---------|------|-------------|---------------|-------------|
| <i>Orchis chusua</i> | Lijiang   | 2800 | 10.27 | 982.53  | 63.24 | 1077.65 | 1.10 | Terrestrial | Forest edge   | Non-endemic |
| <i>Orchis chusua</i> | Lijiang   | 2800 | 10.27 | 982.53  | 63.24 | 1077.65 | 1.10 | Terrestrial | Grassy slope  | Non-endemic |
| <i>Orchis chusua</i> | Zhongdian | 2800 | 8.64  | 641.73  | 69.05 | 914.89  | 1.43 | Terrestrial | Grassy slope  | Non-endemic |
| <i>Orchis chusua</i> | Dali      | 2800 | 10.02 | 1082.70 | 68.61 | 1256.27 | 1.16 | Terrestrial | Open site     | Non-endemic |
| <i>Orchis chusua</i> | Zhenkang  | 2850 | 7.74  | 1602.96 | 81.14 | 1089.09 | 0.68 | Terrestrial | Grassy slope  | Non-endemic |
| <i>Orchis chusua</i> | Zhongdian | 2900 | 8.04  | 641.73  | 69.05 | 914.89  | 1.43 | Terrestrial | Dense forest  | Non-endemic |
| <i>Orchis chusua</i> | Zhongdian | 2900 | 8.04  | 641.73  | 69.05 | 914.89  | 1.43 | Terrestrial | Forest edge   | Non-endemic |
| <i>Orchis chusua</i> | Jingdong  | 2900 | 8.18  | 1128.40 | 76.80 | 1142.11 | 1.01 | Terrestrial | Grassy slope  | Non-endemic |
| <i>Orchis chusua</i> | Dongchuan | 2980 | 7.95  | 1021.73 | 71.65 | 1186.61 | 1.16 | Terrestrial | Meadow        | Non-endemic |
| <i>Orchis chusua</i> | Lijiang   | 3000 | 9.07  | 982.53  | 63.24 | 1077.65 | 1.10 | Terrestrial | Forest edge   | Non-endemic |
| <i>Orchis chusua</i> | Lijiang   | 3000 | 9.07  | 982.53  | 63.24 | 1077.65 | 1.10 | Terrestrial | Grassy slope  | Non-endemic |
| <i>Orchis chusua</i> | Deqin     | 3000 | 7.17  | 639.48  | 70.85 | 896.66  | 1.40 | Terrestrial | Grassy slope  | Non-endemic |
| <i>Orchis chusua</i> | Gongshan  | 3000 | 6.08  | 1738.42 | 78.47 | 860.43  | 0.50 | Terrestrial | Grassy slope  | Non-endemic |
| <i>Orchis chusua</i> | Weixi     | 3000 | 7.43  | 970.70  | 69.95 | 1021.03 | 1.05 | Terrestrial | Meadow        | Non-endemic |
| <i>Orchis chusua</i> | Dali      | 3000 | 8.82  | 1082.70 | 68.61 | 1256.27 | 1.16 | Terrestrial | Open site     | Non-endemic |
| <i>Orchis chusua</i> | Dongchuan | 3000 | 7.83  | 1021.73 | 71.65 | 1186.61 | 1.16 | Terrestrial | Shrubland     | Non-endemic |
| <i>Orchis chusua</i> | Lijiang   | 3000 | 9.07  | 982.53  | 63.24 | 1077.65 | 1.10 | Terrestrial | Sparse forest | Non-endemic |
| <i>Orchis chusua</i> | Eryuan    | 3000 | 8.53  | 745.16  | 68.27 | 1210.94 | 1.63 | Terrestrial | Sparse forest | Non-endemic |
| <i>Orchis chusua</i> | Dayao     | 3100 | 8.33  | 810.80  | 65.01 | 1427.38 | 1.76 | Terrestrial | Meadow        | Non-endemic |
| <i>Orchis chusua</i> | Deqin     | 3100 | 6.57  | 639.48  | 70.85 | 896.66  | 1.40 | Terrestrial | Sparse forest | Non-endemic |
| <i>Orchis chusua</i> | Lijiang   | 3140 | 8.23  | 982.53  | 63.24 | 1077.65 | 1.10 | Terrestrial | Grassy slope  | Non-endemic |
| <i>Orchis chusua</i> | Lijiang   | 3145 | 8.20  | 982.53  | 63.24 | 1077.65 | 1.10 | Terrestrial | Shrubland     | Non-endemic |
| <i>Orchis chusua</i> | Lushui    | 3150 | 7.15  | 1195.57 | 70.63 | 911.65  | 0.76 | Terrestrial | Meadow        | Non-endemic |
| <i>Orchis chusua</i> | Lanping   | 3200 | 6.09  | 989.98  | 74.21 | 939.09  | 0.95 | Terrestrial | Grassy slope  | Non-endemic |
| <i>Orchis chusua</i> | Dali      | 3200 | 7.62  | 1082.70 | 68.61 | 1256.27 | 1.16 | Terrestrial | Meadow        | Non-endemic |
| <i>Orchis chusua</i> | Zhongdian | 3200 | 6.24  | 641.73  | 69.05 | 914.89  | 1.43 | Terrestrial | Meadow        | Non-endemic |
| <i>Orchis chusua</i> | Dongchuan | 3200 | 6.63  | 1021.73 | 71.65 | 1186.61 | 1.16 | Terrestrial | Shrubland     | Non-endemic |
| <i>Orchis chusua</i> | Deqin     | 3300 | 5.37  | 639.48  | 70.85 | 896.66  | 1.40 | Terrestrial | Grassy slope  | Non-endemic |
| <i>Orchis chusua</i> | Deqin     | 3300 | 5.37  | 639.48  | 70.85 | 896.66  | 1.40 | Terrestrial | Grassy slope  | Non-endemic |
| <i>Orchis chusua</i> | Weixi     | 3300 | 5.63  | 970.70  | 69.95 | 1021.03 | 1.05 | Terrestrial | Grassy slope  | Non-endemic |
| <i>Orchis chusua</i> | Weixi     | 3400 | 5.03  | 970.70  | 69.95 | 1021.03 | 1.05 | Terrestrial | Grassy slope  | Non-endemic |
| <i>Orchis chusua</i> | Weixi     | 3400 | 5.03  | 970.70  | 69.95 | 1021.03 | 1.05 | Terrestrial | Grassy slope  | Non-endemic |
| <i>Orchis chusua</i> | Zhenkang  | 3400 | 4.44  | 1602.96 | 81.14 | 1089.09 | 0.68 | Terrestrial | Grassy slope  | Non-endemic |
| <i>Orchis chusua</i> | Zhenkang  | 3400 | 4.44  | 1602.96 | 81.14 | 1089.09 | 0.68 | Terrestrial | Grassy slope  | Non-endemic |
| <i>Orchis chusua</i> | Zhongdian | 3400 | 5.04  | 641.73  | 69.05 | 914.89  | 1.43 | Terrestrial | Grassy slope  | Non-endemic |
| <i>Orchis chusua</i> | Zhongdian | 3400 | 5.04  | 641.73  | 69.05 | 914.89  | 1.43 | Terrestrial | Meadow        | Non-endemic |

|                      |           |      |      |         |       |         |      |             |              |             |
|----------------------|-----------|------|------|---------|-------|---------|------|-------------|--------------|-------------|
| <i>Orchis chusua</i> | Yongde    | 3410 | 6.67 | 1266.25 | 69.00 | 1283.63 | 1.01 | Terrestrial | Dense forest | Non-endemic |
| <i>Orchis chusua</i> | Weixi     | 3500 | 4.43 | 970.70  | 69.95 | 1021.03 | 1.05 | Terrestrial | Grassy slope | Non-endemic |
| <i>Orchis chusua</i> | Weixi     | 3500 | 4.43 | 970.70  | 69.95 | 1021.03 | 1.05 | Terrestrial | Grassy slope | Non-endemic |
| <i>Orchis chusua</i> | Deqin     | 3500 | 4.17 | 639.48  | 70.85 | 896.66  | 1.40 | Terrestrial | Grassy slope | Non-endemic |
| <i>Orchis chusua</i> | Lanping   | 3500 | 4.29 | 989.98  | 74.21 | 939.09  | 0.95 | Terrestrial | Grassy slope | Non-endemic |
| <i>Orchis chusua</i> | Lijiang   | 3500 | 6.07 | 982.53  | 63.24 | 1077.65 | 1.10 | Terrestrial | Grassy slope | Non-endemic |
| <i>Orchis chusua</i> | Dali      | 3500 | 5.82 | 1082.70 | 68.61 | 1256.27 | 1.16 | Terrestrial | Grassy slope | Non-endemic |
| <i>Orchis chusua</i> | Lijiang   | 3500 | 6.07 | 982.53  | 63.24 | 1077.65 | 1.10 | Terrestrial | Grassy slope | Non-endemic |
| <i>Orchis chusua</i> | Weixi     | 3500 | 4.43 | 970.70  | 69.95 | 1021.03 | 1.05 | Terrestrial | Meadow       | Non-endemic |
| <i>Orchis chusua</i> | Deqin     | 3500 | 4.17 | 639.48  | 70.85 | 896.66  | 1.40 | Terrestrial | Open site    | Non-endemic |
| <i>Orchis chusua</i> | Eryuan    | 3500 | 5.53 | 745.16  | 68.27 | 1210.94 | 1.63 | Terrestrial | Shrubland    | Non-endemic |
| <i>Orchis chusua</i> | Dongchuan | 3500 | 4.83 | 1021.73 | 71.65 | 1186.61 | 1.16 | Terrestrial | Shrubland    | Non-endemic |
| <i>Orchis chusua</i> | Deqin     | 3540 | 3.93 | 639.48  | 70.85 | 896.66  | 1.40 | Terrestrial | Open site    | Non-endemic |
| <i>Orchis chusua</i> | Lijiang   | 3550 | 5.77 | 982.53  | 63.24 | 1077.65 | 1.10 | Terrestrial | Meadow       | Non-endemic |
| <i>Orchis chusua</i> | Deqin     | 3600 | 3.57 | 639.48  | 70.85 | 896.66  | 1.40 | Terrestrial | Dense forest | Non-endemic |
| <i>Orchis chusua</i> | Weixi     | 3600 | 3.83 | 970.70  | 69.95 | 1021.03 | 1.05 | Terrestrial | Grassy slope | Non-endemic |
| <i>Orchis chusua</i> | Weixi     | 3600 | 3.83 | 970.70  | 69.95 | 1021.03 | 1.05 | Terrestrial | Grassy slope | Non-endemic |
| <i>Orchis chusua</i> | Weixi     | 3600 | 3.83 | 970.70  | 69.95 | 1021.03 | 1.05 | Terrestrial | Grassy slope | Non-endemic |
| <i>Orchis chusua</i> | Zhongdian | 3600 | 3.84 | 641.73  | 69.05 | 914.89  | 1.43 | Terrestrial | Grassy slope | Non-endemic |
| <i>Orchis chusua</i> | Zhongdian | 3600 | 3.84 | 641.73  | 69.05 | 914.89  | 1.43 | Terrestrial | Shrubland    | Non-endemic |
| <i>Orchis chusua</i> | Zhongdian | 3650 | 3.54 | 641.73  | 69.05 | 914.89  | 1.43 | Terrestrial | Grassy slope | Non-endemic |
| <i>Orchis chusua</i> | Lijiang   | 3650 | 5.17 | 982.53  | 63.24 | 1077.65 | 1.10 | Terrestrial | Grassy slope | Non-endemic |
| <i>Orchis chusua</i> | Zhongdian | 3650 | 3.54 | 641.73  | 69.05 | 914.89  | 1.43 | Terrestrial | Grassy slope | Non-endemic |
| <i>Orchis chusua</i> | Lijiang   | 3700 | 4.87 | 982.53  | 63.24 | 1077.65 | 1.10 | Terrestrial | Meadow       | Non-endemic |
| <i>Orchis chusua</i> | Huize     | 3720 | 3.05 | 799.98  | 71.46 | 1179.17 | 1.47 | Terrestrial | Meadow       | Non-endemic |
| <i>Orchis chusua</i> | Zhongdian | 3750 | 2.94 | 641.73  | 69.05 | 914.89  | 1.43 | Terrestrial | Shrubland    | Non-endemic |
| <i>Orchis chusua</i> | Deqin     | 3800 | 2.37 | 639.48  | 70.85 | 896.66  | 1.40 | Terrestrial | Dense forest | Non-endemic |
| <i>Orchis chusua</i> | Zhongdian | 3800 | 2.64 | 641.73  | 69.05 | 914.89  | 1.43 | Terrestrial | Grassy slope | Non-endemic |
| <i>Orchis chusua</i> | Lijiang   | 3800 | 4.27 | 982.53  | 63.24 | 1077.65 | 1.10 | Terrestrial | Grassy slope | Non-endemic |
| <i>Orchis chusua</i> | Zhongdian | 3800 | 2.64 | 641.73  | 69.05 | 914.89  | 1.43 | Terrestrial | Grassy slope | Non-endemic |
| <i>Orchis chusua</i> | Zhongdian | 3850 | 2.34 | 641.73  | 69.05 | 914.89  | 1.43 | Terrestrial | Forest edge  | Non-endemic |
| <i>Orchis chusua</i> | Zhongdian | 3890 | 2.10 | 641.73  | 69.05 | 914.89  | 1.43 | Terrestrial | Grassy slope | Non-endemic |
| <i>Orchis chusua</i> | Deqin     | 3900 | 1.77 | 639.48  | 70.85 | 896.66  | 1.40 | Terrestrial | Grassy slope | Non-endemic |
| <i>Orchis chusua</i> | Dongchuan | 3900 | 2.43 | 1021.73 | 71.65 | 1186.61 | 1.16 | Terrestrial | Meadow       | Non-endemic |
| <i>Orchis chusua</i> | Fugong    | 4000 | 0.06 | 1441.43 | 79.99 | 906.18  | 0.63 | Terrestrial | Dense forest | Non-endemic |
| <i>Orchis chusua</i> | Deqin     | 4000 | 1.17 | 639.48  | 70.85 | 896.66  | 1.40 | Terrestrial | Grassy slope | Non-endemic |

|                                 |           |      |       |         |       |         |      |             |              |             |
|---------------------------------|-----------|------|-------|---------|-------|---------|------|-------------|--------------|-------------|
| <i>Orchis chusua</i>            | Zhongdian | 4000 | 1.44  | 641.73  | 69.05 | 914.89  | 1.43 | Terrestrial | Grassy slope | Non-endemic |
| <i>Orchis chusua var.nana</i>   | Eryuan    | 3650 | 4.63  | 745.16  | 68.27 | 1210.94 | 1.63 | Terrestrial | Shrubland    | Non-endemic |
| <i>Orchis chusua var.nana</i>   | Zhongdian | 4000 | 1.44  | 641.73  | 69.05 | 914.89  | 1.43 | Terrestrial | Shrubland    | Non-endemic |
| <i>Orchis crenulata</i>         | Lijiang   | 3300 | 7.27  | 982.53  | 63.24 | 1077.65 | 1.10 | Terrestrial | Open site    | Endemic     |
| <i>Orchis diantha</i>           | Zhongdian | 2800 | 8.64  | 641.73  | 69.05 | 914.89  | 1.43 | Terrestrial | Grassy slope | Non-endemic |
| <i>Orchis diantha</i>           | Lijiang   | 3000 | 9.07  | 982.53  | 63.24 | 1077.65 | 1.10 | Terrestrial | Grassy slope | Non-endemic |
| <i>Orchis diantha</i>           | Yangbi    | 3100 | 7.39  | 1044.23 | 72.19 | 1161.15 | 1.11 | Terrestrial | Forest edge  | Non-endemic |
| <i>Orchis diantha</i>           | Weixi     | 3100 | 6.83  | 970.70  | 69.95 | 1021.03 | 1.05 | Terrestrial | Grassy slope | Non-endemic |
| <i>Orchis diantha</i>           | Lijiang   | 3300 | 7.27  | 982.53  | 63.24 | 1077.65 | 1.10 | Terrestrial | Meadow       | Non-endemic |
| <i>Orchis diantha</i>           | Zhongdian | 3400 | 5.04  | 641.73  | 69.05 | 914.89  | 1.43 | Terrestrial | Shrubland    | Non-endemic |
| <i>Orchis diantha</i>           | Zhongdian | 3440 | 4.80  | 641.73  | 69.05 | 914.89  | 1.43 | Terrestrial | Grassy slope | Non-endemic |
| <i>Orchis diantha</i>           | Gongshan  | 3500 | 3.08  | 1738.42 | 78.47 | 860.43  | 0.50 | Terrestrial | Forest edge  | Non-endemic |
| <i>Orchis diantha</i>           | Weixi     | 3700 | 3.23  | 970.70  | 69.95 | 1021.03 | 1.05 | Terrestrial | Grassy slope | Non-endemic |
| <i>Orchis diantha</i>           | Weixi     | 3800 | 2.63  | 970.70  | 69.95 | 1021.03 | 1.05 | Terrestrial | Meadow       | Non-endemic |
| <i>Orchis diantha</i>           | Zhongdian | 3850 | 2.34  | 641.73  | 69.05 | 914.89  | 1.43 | Terrestrial | Dense forest | Non-endemic |
| <i>Orchis diantha</i>           | Weixi     | 3900 | 2.03  | 970.70  | 69.95 | 1021.03 | 1.05 | Terrestrial | Grassy slope | Non-endemic |
| <i>Orchis diantha</i>           | Zhongdian | 3900 | 2.04  | 641.73  | 69.05 | 914.89  | 1.43 | Terrestrial | Grassy slope | Non-endemic |
| <i>Orchis diantha</i>           | Gongshan  | 4000 | 0.08  | 1738.42 | 78.47 | 860.43  | 0.50 | Terrestrial | Meadow       | Non-endemic |
| <i>Orchis diantha</i>           | Zhongdian | 4000 | 1.44  | 641.73  | 69.05 | 914.89  | 1.43 | Terrestrial | Meadow       | Non-endemic |
| <i>Orchis diantha</i>           | Deqin     | 4300 | -0.63 | 639.48  | 70.85 | 896.66  | 1.40 | Terrestrial | Grassy slope | Non-endemic |
| <i>Orchis latifolia</i>         | Zhongdian | 3350 | 5.34  | 641.73  | 69.05 | 914.89  | 1.43 | Terrestrial | Meadow       | Non-endemic |
| <i>Orchis limprichtii</i>       | Lijiang   | 4150 | 2.17  | 982.53  | 63.24 | 1077.65 | 1.10 | Terrestrial | Grassy slope | Non-endemic |
| <i>Orchis tschiliensis</i>      | Deqin     | 4100 | 0.57  | 639.48  | 70.85 | 896.66  | 1.40 | Terrestrial | Grassy slope | Non-endemic |
| <i>Orchis wardii</i>            | Zhongdian | 2400 | 11.04 | 641.73  | 69.05 | 914.89  | 1.43 | Terrestrial | Grassy slope | Non-endemic |
| <i>Orchis wardii</i>            | Zhongdian | 3700 | 3.24  | 641.73  | 69.05 | 914.89  | 1.43 | Terrestrial | Meadow       | Non-endemic |
| <i>Orchis wardii</i>            | Zhongdian | 3750 | 2.94  | 641.73  | 69.05 | 914.89  | 1.43 | Terrestrial | Meadow       | Non-endemic |
| <i>Orchis wardii</i>            | Zhongdian | 3800 | 2.64  | 641.73  | 69.05 | 914.89  | 1.43 | Terrestrial | Meadow       | Non-endemic |
| <i>Oreorchis erythrochrysea</i> | Jingdong  | 1900 | 14.18 | 1128.40 | 76.80 | 1142.11 | 1.01 | Terrestrial | Grassy slope | Non-endemic |
| <i>Oreorchis erythrochrysea</i> | Yangbi    | 2120 | 13.27 | 1044.23 | 72.19 | 1161.15 | 1.11 | Terrestrial | Dense forest | Non-endemic |
| <i>Oreorchis erythrochrysea</i> | Yangbi    | 2180 | 12.91 | 1044.23 | 72.19 | 1161.15 | 1.11 | Terrestrial | Dense forest | Non-endemic |
| <i>Oreorchis erythrochrysea</i> | Jingdong  | 2200 | 12.38 | 1128.40 | 76.80 | 1142.11 | 1.01 | Terrestrial | Dense forest | Non-endemic |
| <i>Oreorchis erythrochrysea</i> | Jingdong  | 2200 | 12.38 | 1128.40 | 76.80 | 1142.11 | 1.01 | Terrestrial | Grassy slope | Non-endemic |
| <i>Oreorchis erythrochrysea</i> | Gongshan  | 2300 | 10.28 | 1738.42 | 78.47 | 860.43  | 0.50 | Terrestrial | Dense forest | Non-endemic |
| <i>Oreorchis erythrochrysea</i> | Heqing    | 2400 | 12.39 | 977.00  | 65.16 | 1211.84 | 1.24 | Terrestrial | Forest edge  | Non-endemic |
| <i>Oreorchis erythrochrysea</i> | Lijiang   | 2400 | 12.67 | 982.53  | 63.24 | 1077.65 | 1.10 | Terrestrial | Meadow       | Non-endemic |
| <i>Oreorchis erythrochrysea</i> | Lijiang   | 2440 | 12.43 | 982.53  | 63.24 | 1077.65 | 1.10 | Terrestrial | Meadow       | Non-endemic |

|                                 |           |      |       |         |       |         |      |             |              |             |
|---------------------------------|-----------|------|-------|---------|-------|---------|------|-------------|--------------|-------------|
| <i>Oreorchis erythrochrysea</i> | Lijiang   | 2600 | 11.47 | 982.53  | 63.24 | 1077.65 | 1.10 | Terrestrial | Meadow       | Non-endemic |
| <i>Oreorchis erythrochrysea</i> | Zhongdian | 3000 | 7.44  | 641.73  | 69.05 | 914.89  | 1.43 | Terrestrial | Dense forest | Non-endemic |
| <i>Oreorchis erythrochrysea</i> | Zhongdian | 3000 | 7.44  | 641.73  | 69.05 | 914.89  | 1.43 | Terrestrial | Dense forest | Non-endemic |
| <i>Oreorchis erythrochrysea</i> | Zhongdian | 3000 | 7.44  | 641.73  | 69.05 | 914.89  | 1.43 | Terrestrial | Dense forest | Non-endemic |
| <i>Oreorchis erythrochrysea</i> | Weixi     | 3000 | 7.43  | 970.70  | 69.95 | 1021.03 | 1.05 | Terrestrial | Shrubland    | Non-endemic |
| <i>Oreorchis erythrochrysea</i> | Zhongdian | 3000 | 7.44  | 641.73  | 69.05 | 914.89  | 1.43 | Terrestrial | Shrubland    | Non-endemic |
| <i>Oreorchis erythrochrysea</i> | Lijiang   | 3010 | 9.01  | 982.53  | 63.24 | 1077.65 | 1.10 | Terrestrial | Forest edge  | Non-endemic |
| <i>Oreorchis erythrochrysea</i> | Dali      | 3100 | 8.22  | 1082.70 | 68.61 | 1256.27 | 1.16 | Terrestrial | Shrubland    | Non-endemic |
| <i>Oreorchis erythrochrysea</i> | Weixi     | 3200 | 6.23  | 970.70  | 69.95 | 1021.03 | 1.05 | Terrestrial | Dense forest | Non-endemic |
| <i>Oreorchis erythrochrysea</i> | Weixi     | 3200 | 6.23  | 970.70  | 69.95 | 1021.03 | 1.05 | Terrestrial | Dense forest | Non-endemic |
| <i>Oreorchis erythrochrysea</i> | Weixi     | 3200 | 6.23  | 970.70  | 69.95 | 1021.03 | 1.05 | Terrestrial | Grassy slope | Non-endemic |
| <i>Oreorchis erythrochrysea</i> | Lijiang   | 3200 | 7.87  | 982.53  | 63.24 | 1077.65 | 1.10 | Terrestrial | Meadow       | Non-endemic |
| <i>Oreorchis erythrochrysea</i> | Lijiang   | 3200 | 7.87  | 982.53  | 63.24 | 1077.65 | 1.10 | Terrestrial | Meadow       | Non-endemic |
| <i>Oreorchis erythrochrysea</i> | Lijiang   | 3300 | 7.27  | 982.53  | 63.24 | 1077.65 | 1.10 | Terrestrial | Dense forest | Non-endemic |
| <i>Oreorchis erythrochrysea</i> | Deqin     | 3350 | 5.07  | 639.48  | 70.85 | 896.66  | 1.40 | Terrestrial | Shrubland    | Non-endemic |
| <i>Oreorchis erythrochrysea</i> | Zhongdian | 3450 | 4.74  | 641.73  | 69.05 | 914.89  | 1.43 | Terrestrial | Dense forest | Non-endemic |
| <i>Oreorchis erythrochrysea</i> | Zhongdian | 3500 | 4.44  | 641.73  | 69.05 | 914.89  | 1.43 | Terrestrial | Dense forest | Non-endemic |
| <i>Oreorchis erythrochrysea</i> | Weixi     | 3500 | 4.43  | 970.70  | 69.95 | 1021.03 | 1.05 | Terrestrial | Open site    | Non-endemic |
| <i>Oreorchis erythrochrysea</i> | Deqin     | 3600 | 3.57  | 639.48  | 70.85 | 896.66  | 1.40 | Terrestrial | Open site    | Non-endemic |
| <i>Oreorchis erythrochrysea</i> | Zhongdian | 3700 | 3.24  | 641.73  | 69.05 | 914.89  | 1.43 | Terrestrial | Shrubland    | Non-endemic |
| <i>Oreorchis fargesii</i>       | Fuyuan    | 2500 | 9.87  | 1084.02 | 74.80 | 1096.10 | 1.01 | Terrestrial | Shrubland    | Non-endemic |
| <i>Oreorchis nana</i>           | Zhongdian | 3500 | 4.44  | 641.73  | 69.05 | 914.89  | 1.43 | Epiphyte    | Open site    | Non-endemic |
| <i>Oreorchis nana</i>           | Zhongdian | 3800 | 2.64  | 641.73  | 69.05 | 914.89  | 1.43 | Epiphyte    | Open site    | Non-endemic |
| <i>Oreorchis patens</i>         | Gongshan  | 1800 | 13.28 | 1738.42 | 78.47 | 860.43  | 0.50 | Terrestrial | Shrubland    | Non-endemic |
| <i>Oreorchis patens</i>         | Yangbi    | 2220 | 12.67 | 1044.23 | 72.19 | 1161.15 | 1.11 | Terrestrial | Dense forest | Non-endemic |
| <i>Oreorchis patens</i>         | Weixi     | 2300 | 11.63 | 970.70  | 69.95 | 1021.03 | 1.05 | Terrestrial | Open site    | Non-endemic |
| <i>Oreorchis patens</i>         | Weixi     | 2400 | 11.03 | 970.70  | 69.95 | 1021.03 | 1.05 | Terrestrial | Forest edge  | Non-endemic |
| <i>Oreorchis patens</i>         | Yongde    | 2420 | 12.61 | 1266.25 | 69.00 | 1283.63 | 1.01 | Terrestrial | Forest edge  | Non-endemic |
| <i>Oreorchis patens</i>         | Dali      | 2600 | 11.22 | 1082.70 | 68.61 | 1256.27 | 1.16 | Terrestrial | Dense forest | Non-endemic |
| <i>Oreorchis patens</i>         | Fugong    | 2750 | 7.56  | 1441.43 | 79.99 | 906.18  | 0.63 | Terrestrial | Open site    | Non-endemic |
| <i>Oreorchis patens</i>         | Lijiang   | 3050 | 8.77  | 982.53  | 63.24 | 1077.65 | 1.10 | Terrestrial | Shrubland    | Non-endemic |
| <i>Ornithochilus difformis</i>  | Mengla    | 900  | 19.80 | 1514.70 | 84.25 | 1146.68 | 0.76 | Epiphyte    | Dense forest | Non-endemic |
| <i>Ornithochilus difformis</i>  | Hekou     | 1050 | 17.45 | 1768.58 | 84.25 | 1166.26 | 0.66 | Epiphyte    | Dense forest | Non-endemic |
| <i>Ornithochilus difformis</i>  | Eshan     | 1500 | 16.21 | 938.39  | 78.62 | 1123.48 | 1.20 | Epiphyte    | Dense forest | Non-endemic |
| <i>Ornithochilus difformis</i>  | Menghai   | 1760 | 15.00 | 1314.38 | 80.83 | 1150.91 | 0.88 | Epiphyte    | Dense forest | Non-endemic |
| <i>Ornithochilus difformis</i>  | Menghai   | 1800 | 14.76 | 1314.38 | 80.83 | 1150.91 | 0.88 | Epiphyte    | Dense forest | Non-endemic |

|                                     |           |      |       |         |       |         |      |          |              |             |
|-------------------------------------|-----------|------|-------|---------|-------|---------|------|----------|--------------|-------------|
| <i>Ornithochilus difformis</i>      | Menghai   | 1800 | 14.76 | 1314.38 | 80.83 | 1150.91 | 0.88 | Epiphyte | Dense forest | Non-endemic |
| <i>Ornithochilus difformis</i>      | Shuangbai | 1920 | 15.36 | 942.53  | 72.21 | 1300.52 | 1.38 | Epiphyte | Dense forest | Non-endemic |
| <i>Ornithochilus difformis</i>      | Eryuan    | 2100 | 13.93 | 745.16  | 68.27 | 1210.94 | 1.63 | Epiphyte | Dense forest | Non-endemic |
| <i>Ornithochilus yingjiangensis</i> | Yingjiang | 1350 | 16.29 | 1505.33 | 79.98 | 1158.19 | 0.77 | Epiphyte | Dense forest | Endemic     |
| <i>Otochilus alba</i>               | Luchun    | 1700 | 16.50 | 2013.54 | 78.64 | 1151.56 | 0.57 | Epiphyte | Dense forest | Non-endemic |
| <i>Otochilus alba</i>               | Jingdong  | 2300 | 11.78 | 1128.40 | 76.80 | 1142.11 | 1.01 | Epiphyte | Dense forest | Non-endemic |
| <i>Otochilus fuscus</i>             | Zhenkang  | 1200 | 17.64 | 1602.96 | 81.14 | 1089.09 | 0.68 | Epiphyte | Dense forest | Non-endemic |
| <i>Otochilus fuscus</i>             | Gongshan  | 1320 | 16.16 | 1738.42 | 78.47 | 860.43  | 0.50 | Epiphyte | Dense forest | Non-endemic |
| <i>Otochilus fuscus</i>             | Gongshan  | 1500 | 15.08 | 1738.42 | 78.47 | 860.43  | 0.50 | Epiphyte | Dense forest | Non-endemic |
| <i>Otochilus fuscus</i>             | Gongshan  | 1500 | 15.08 | 1738.42 | 78.47 | 860.43  | 0.50 | Epiphyte | Dense forest | Non-endemic |
| <i>Otochilus fuscus</i>             | Gengma    | 1700 | 15.47 | 1327.70 | 77.28 | 1181.78 | 0.89 | Epiphyte | Dense forest | Non-endemic |
| <i>Otochilus fuscus</i>             | Luxi      | 1750 | 14.58 | 1650.33 | 79.33 | 1183.39 | 0.72 | Epiphyte | Dense forest | Non-endemic |
| <i>Otochilus fuscus</i>             | Longling  | 1800 | 13.32 | 2098.66 | 84.65 | 973.45  | 0.46 | Epiphyte | Dense forest | Non-endemic |
| <i>Otochilus fuscus</i>             | Longling  | 1800 | 13.32 | 2098.66 | 84.65 | 973.45  | 0.46 | Epiphyte | Dense forest | Non-endemic |
| <i>Otochilus fuscus</i>             | Lushui    | 2000 | 14.05 | 1195.57 | 70.63 | 911.65  | 0.76 | Epiphyte | Dense forest | Non-endemic |
| <i>Otochilus fuscus</i>             | Jingdong  | 2100 | 12.98 | 1128.40 | 76.80 | 1142.11 | 1.01 | Epiphyte | Dense forest | Non-endemic |
| <i>Otochilus fuscus</i>             | Tengchong | 2100 | 12.40 | 1501.45 | 78.06 | 857.93  | 0.57 | Epiphyte | Dense forest | Non-endemic |
| <i>Otochilus fuscus</i>             | Gongshan  | 2100 | 11.48 | 1738.42 | 78.47 | 860.43  | 0.50 | Epiphyte | Dense forest | Non-endemic |
| <i>Otochilus lancilabius</i>        | Yongde    | 2600 | 11.53 | 1266.25 | 69.00 | 1283.63 | 1.01 | Epiphyte | Dense forest | Non-endemic |
| <i>Otochilus porrectus</i>          | Malipo    | 1000 | 18.26 | 1063.54 | 85.83 | 1053.97 | 0.99 | Epiphyte | Dense forest | Non-endemic |
| <i>Otochilus porrectus</i>          | Xichou    | 1000 | 18.93 | 1267.54 | 82.98 | 985.97  | 0.78 | Epiphyte | Dense forest | Non-endemic |
| <i>Otochilus porrectus</i>          | Gongshan  | 1300 | 16.28 | 1738.42 | 78.47 | 860.43  | 0.50 | Epiphyte | Dense forest | Non-endemic |
| <i>Otochilus porrectus</i>          | Gongshan  | 1300 | 16.28 | 1738.42 | 78.47 | 860.43  | 0.50 | Epiphyte | Dense forest | Non-endemic |
| <i>Otochilus porrectus</i>          | Gongshan  | 1300 | 16.28 | 1738.42 | 78.47 | 860.43  | 0.50 | Epiphyte | Forest edge  | Non-endemic |
| <i>Otochilus porrectus</i>          | Gongshan  | 1300 | 16.28 | 1738.42 | 78.47 | 860.43  | 0.50 | Epiphyte | Shrubland    | Non-endemic |
| <i>Otochilus porrectus</i>          | Gongshan  | 1320 | 16.16 | 1738.42 | 78.47 | 860.43  | 0.50 | Epiphyte | Dense forest | Non-endemic |
| <i>Otochilus porrectus</i>          | Gongshan  | 1350 | 15.98 | 1738.42 | 78.47 | 860.43  | 0.50 | Epiphyte | Dense forest | Non-endemic |
| <i>Otochilus porrectus</i>          | Gongshan  | 1350 | 15.98 | 1738.42 | 78.47 | 860.43  | 0.50 | Epiphyte | Dense forest | Non-endemic |
| <i>Otochilus porrectus</i>          | Gongshan  | 1350 | 15.98 | 1738.42 | 78.47 | 860.43  | 0.50 | Epiphyte | Dense forest | Non-endemic |
| <i>Otochilus porrectus</i>          | Gongshan  | 1380 | 15.80 | 1738.42 | 78.47 | 860.43  | 0.50 | Epiphyte | Dense forest | Non-endemic |
| <i>Otochilus porrectus</i>          | Gongshan  | 1400 | 15.68 | 1738.42 | 78.47 | 860.43  | 0.50 | Epiphyte | Dense forest | Non-endemic |
| <i>Otochilus porrectus</i>          | Mengla    | 1400 | 16.80 | 1514.70 | 84.25 | 1146.68 | 0.76 | Epiphyte | Dense forest | Non-endemic |
| <i>Otochilus porrectus</i>          | Gongshan  | 1400 | 15.68 | 1738.42 | 78.47 | 860.43  | 0.50 | Epiphyte | Dense forest | Non-endemic |
| <i>Otochilus porrectus</i>          | Gongshan  | 1420 | 15.56 | 1738.42 | 78.47 | 860.43  | 0.50 | Epiphyte | Dense forest | Non-endemic |
| <i>Otochilus porrectus</i>          | Malipo    | 1450 | 15.56 | 1063.54 | 85.83 | 1053.97 | 0.99 | Epiphyte | Dense forest | Non-endemic |
| <i>Otochilus porrectus</i>          | Fugong    | 1500 | 15.06 | 1441.43 | 79.99 | 906.18  | 0.63 | Epiphyte | Dense forest | Non-endemic |

|                             |            |      |       |         |       |         |      |             |               |             |
|-----------------------------|------------|------|-------|---------|-------|---------|------|-------------|---------------|-------------|
| <i>Otochilus porrectus</i>  | Gongshan   | 1500 | 15.08 | 1738.42 | 78.47 | 860.43  | 0.50 | Epiphyte    | Dense forest  | Non-endemic |
| <i>Otochilus porrectus</i>  | Gongshan   | 1500 | 15.08 | 1738.42 | 78.47 | 860.43  | 0.50 | Epiphyte    | Shrubland     | Non-endemic |
| <i>Otochilus porrectus</i>  | Gongshan   | 1500 | 15.08 | 1738.42 | 78.47 | 860.43  | 0.50 | Epiphyte    | Shrubland     | Non-endemic |
| <i>Otochilus porrectus</i>  | Longling   | 1510 | 15.06 | 2098.66 | 84.65 | 973.45  | 0.46 | Epiphyte    | Dense forest  | Non-endemic |
| <i>Otochilus porrectus</i>  | Fugong     | 1600 | 14.46 | 1441.43 | 79.99 | 906.18  | 0.63 | Epiphyte    | Dense forest  | Non-endemic |
| <i>Otochilus porrectus</i>  | Gongshan   | 1600 | 14.48 | 1738.42 | 78.47 | 860.43  | 0.50 | Epiphyte    | Dense forest  | Non-endemic |
| <i>Otochilus porrectus</i>  | Tengchong  | 1600 | 15.40 | 1501.45 | 78.06 | 857.93  | 0.57 | Epiphyte    | Shrubland     | Non-endemic |
| <i>Otochilus porrectus</i>  | Tengchong  | 1700 | 14.80 | 1501.45 | 78.06 | 857.93  | 0.57 | Epiphyte    | Dense forest  | Non-endemic |
| <i>Otochilus porrectus</i>  | Jingdong   | 1800 | 14.78 | 1128.40 | 76.80 | 1142.11 | 1.01 | Epiphyte    | Dense forest  | Non-endemic |
| <i>Otochilus porrectus</i>  | Gongshan   | 1800 | 13.28 | 1738.42 | 78.47 | 860.43  | 0.50 | Epiphyte    | Shrubland     | Non-endemic |
| <i>Otochilus porrectus</i>  | Luchun     | 1900 | 15.30 | 2013.54 | 78.64 | 1151.56 | 0.57 | Epiphyte    | Dense forest  | Non-endemic |
| <i>Otochilus porrectus</i>  | Tengchong  | 1900 | 13.60 | 1501.45 | 78.06 | 857.93  | 0.57 | Epiphyte    | Dense forest  | Non-endemic |
| <i>Otochilus porrectus</i>  | Gongshan   | 1920 | 12.56 | 1738.42 | 78.47 | 860.43  | 0.50 | Epiphyte    | Dense forest  | Non-endemic |
| <i>Otochilus porrectus</i>  | Pingbian   | 1940 | 13.18 | 1648.57 | 86.34 | 990.16  | 0.60 | Epiphyte    | Dense forest  | Non-endemic |
| <i>Otochilus porrectus</i>  | Fugong     | 2000 | 12.06 | 1441.43 | 79.99 | 906.18  | 0.63 | Epiphyte    | Dense forest  | Non-endemic |
| <i>Otochilus porrectus</i>  | Gongshan   | 2000 | 12.08 | 1738.42 | 78.47 | 860.43  | 0.50 | Epiphyte    | Dense forest  | Non-endemic |
| <i>Otochilus porrectus</i>  | Malipo     | 2000 | 12.26 | 1063.54 | 85.83 | 1053.97 | 0.99 | Epiphyte    | Dense forest  | Non-endemic |
| <i>Otochilus porrectus</i>  | Lushui     | 2000 | 14.05 | 1195.57 | 70.63 | 911.65  | 0.76 | Epiphyte    | Dense forest  | Non-endemic |
| <i>Otochilus porrectus</i>  | Malipo     | 2100 | 11.66 | 1063.54 | 85.83 | 1053.97 | 0.99 | Epiphyte    | Shrubland     | Non-endemic |
| <i>Otochilus porrectus</i>  | Luchun     | 2400 | 12.30 | 2013.54 | 78.64 | 1151.56 | 0.57 | Epiphyte    | Dense forest  | Non-endemic |
| <i>Otochilus porrectus</i>  | Luchun     | 2400 | 12.30 | 2013.54 | 78.64 | 1151.56 | 0.57 | Epiphyte    | Dense forest  | Non-endemic |
| <i>Otochilus porrectus</i>  | Fengqing   | 2450 | 11.50 | 1352.80 | 73.24 | 1172.52 | 0.87 | Epiphyte    | Dense forest  | Non-endemic |
| <i>Otochilus porrectus</i>  | Yongde     | 2550 | 11.83 | 1266.25 | 69.00 | 1283.63 | 1.01 | Epiphyte    | Dense forest  | Non-endemic |
| <i>Otochilus porrectus</i>  | Fengqing   | 2600 | 10.60 | 1352.80 | 73.24 | 1172.52 | 0.87 | Epiphyte    | Dense forest  | Non-endemic |
| <i>Otochilus porrectus</i>  | Lincang    | 2800 | 9.72  | 1165.84 | 72.08 | 1167.73 | 1.00 | Epiphyte    | Dense forest  | Non-endemic |
| <i>Otochilus porrectus</i>  | Gongshan   | 3000 | 6.08  | 1738.42 | 78.47 | 860.43  | 0.50 | Epiphyte    | Dense forest  | Non-endemic |
| <i>Pachystoma pubescens</i> | Guangnan   | 150  | 23.35 | 1044.26 | 78.94 | 1090.35 | 1.04 | Terrestrial | Grassy slope  | Non-endemic |
| <i>Pachystoma pubescens</i> | Guangnan   | 800  | 19.45 | 1044.26 | 78.94 | 1090.35 | 1.04 | Terrestrial | Grassy slope  | Non-endemic |
| <i>Pachystoma pubescens</i> | Wenshan    | 1020 | 19.54 | 988.87  | 76.70 | 1272.98 | 1.29 | Terrestrial | Grassy slope  | Non-endemic |
| <i>Panisea cavaleriei</i>   | Jiangchuan | 1780 | 15.32 | 872.74  | 74.72 | 1181.99 | 1.35 | Epiphyte    | Dense forest  | Non-endemic |
| <i>Panisea cavaleriei</i>   | Songming   | 1980 | 13.71 | 1010.18 | 74.14 | 1134.24 | 1.12 | Epiphyte    | Dense forest  | Non-endemic |
| <i>Panisea cavaleriei</i>   | Songming   | 2020 | 13.47 | 1010.18 | 74.14 | 1134.24 | 1.12 | Epiphyte    | Sparse forest | Non-endemic |
| <i>Panisea tricallosa</i>   | Pingbian   | 1500 | 15.82 | 1648.57 | 86.34 | 990.16  | 0.60 | Epiphyte    | Dense forest  | Non-endemic |
| <i>Panisea unifolia</i>     | Maguan     | 1300 | 17.21 | 1330.52 | 83.25 | 1086.43 | 0.82 | Epiphyte    | Dense forest  | Non-endemic |
| <i>Panisea unifolia</i>     | Malipo     | 1400 | 15.86 | 1063.54 | 85.83 | 1053.97 | 0.99 | Epiphyte    | Dense forest  | Non-endemic |
| <i>Panisea unifolia</i>     | Lincang    | 2400 | 12.12 | 1165.84 | 72.08 | 1167.73 | 1.00 | Epiphyte    | Dense forest  | Non-endemic |

|                                                         |          |      |       |         |       |         |      |             |               |             |
|---------------------------------------------------------|----------|------|-------|---------|-------|---------|------|-------------|---------------|-------------|
| <i>Panisea yunnanensis</i>                              | Xichou   | 1200 | 17.73 | 1267.54 | 82.98 | 985.97  | 0.78 | Epiphyte    | Dense forest  | Endemic     |
| <i>Panisea yunnanensis</i>                              | Malipo   | 1500 | 15.26 | 1063.54 | 85.83 | 1053.97 | 0.99 | Epiphyte    | Dense forest  | Endemic     |
| <i>Panisea yunnanensis</i>                              | Malipo   | 1500 | 15.26 | 1063.54 | 85.83 | 1053.97 | 0.99 | Epiphyte    | Shrubland     | Endemic     |
| <i>Panisea yunnanensis</i>                              | Malipo   | 1800 | 13.46 | 1063.54 | 85.83 | 1053.97 | 0.99 | Epiphyte    | Dense forest  | Endemic     |
| <i>Paphiopedilum armeniacum</i>                         | Lushui   | 1400 | 17.65 | 1195.57 | 70.63 | 911.65  | 0.76 | Epiphyte    | Shrubland     | Non-endemic |
| <i>Paphiopedilum armeniacum</i>                         | Gongshan | 1500 | 15.08 | 1738.42 | 78.47 | 860.43  | 0.50 | Epiphyte    | Dense forest  | Non-endemic |
| <i>Paphiopedilum armeniacum</i>                         | Baoshan  | 2010 | 13.70 | 992.38  | 73.87 | 1160.15 | 1.17 | Epiphyte    | Grassy slope  | Non-endemic |
| <i>Paphiopedilum armeniacum</i>                         | Baoshan  | 2415 | 11.27 | 992.38  | 73.87 | 1160.15 | 1.17 | Epiphyte    | Shrubland     | Non-endemic |
| <i>Paphiopedilum bellatulum</i>                         | Yongde   | 880  | 21.85 | 1266.25 | 69.00 | 1283.63 | 1.01 | Terrestrial | Dense forest  | Non-endemic |
| <i>Paphiopedilum bellatulum</i>                         | Puer     | 1100 | 19.66 | 1429.78 | 79.51 | 1123.79 | 0.79 | Terrestrial | Dense forest  | Non-endemic |
| <i>Paphiopedilum concolor</i>                           | Jinping  | 1200 | 18.29 | 2305.17 | 83.81 | 1030.46 | 0.45 | Epiphyte    | Dense forest  | Non-endemic |
| <i>Paphiopedilum concolor</i>                           | Jianshui | 1430 | 17.97 | 793.10  | 71.73 | 1413.81 | 1.78 | Epiphyte    | Forest edge   | Non-endemic |
| <i>Paphiopedilum dianthum</i>                           | Xichou   | 1000 | 18.93 | 1267.54 | 82.98 | 985.97  | 0.78 | Epiphyte    | Dense forest  | Non-endemic |
| <i>Paphiopedilum dianthum</i>                           | Mengzi   | 1800 | 15.66 | 855.35  | 71.82 | 1434.56 | 1.68 | epiphyte    | Grassy slope  | Non-endemic |
| <i>Paphiopedilum hirsutissimum</i>                      | Funing   | 700  | 19.42 | 1161.58 | 79.07 | 1147.17 | 0.99 | Epiphyte    | Sparse forest | Non-endemic |
| <i>Paphiopedilum hirsutissimum</i>                      | Xichou   | 870  | 19.71 | 1267.54 | 82.98 | 985.97  | 0.78 | Epiphyte    | Dense forest  | Non-endemic |
| <i>Paphiopedilum malipoense</i>                         | Malipo   | 1500 | 15.26 | 1063.54 | 85.83 | 1053.97 | 0.99 | Terrestrial | Dense forest  | Non-endemic |
| <i>Paphiopedilum malipoense</i>                         | Malipo   | 1600 | 14.66 | 1063.54 | 85.83 | 1053.97 | 0.99 | Terrestrial | Dense forest  | Non-endemic |
| <i>Paphiopedilum micranthum</i>                         | Xichou   | 870  | 19.71 | 1267.54 | 82.98 | 985.97  | 0.78 | Epiphyte    | Dense forest  | Non-endemic |
| <i>Paphiopedilum micranthum</i>                         | Xichou   | 1420 | 16.41 | 1267.54 | 82.98 | 985.97  | 0.78 | Epiphyte    | Dense forest  | Non-endemic |
| <i>Paphiopedilum micranthum</i>                         | Malipo   | 1470 | 15.44 | 1063.54 | 85.83 | 1053.97 | 0.99 | Epiphyte    | Dense forest  | Non-endemic |
| <i>Paphiopedilum micranthum</i>                         | Xichou   | 1700 | 14.73 | 1267.54 | 82.98 | 985.97  | 0.78 | Epiphyte    | Dense forest  | Non-endemic |
| <i>Paphiopedilum parishii</i>                           | Mengla   | 1050 | 18.90 | 1514.70 | 84.25 | 1146.68 | 0.76 | Epiphyte    | Dense forest  | Non-endemic |
| <i>Paphiopedilum tigrinum</i>                           | Lushui   | 1920 | 14.53 | 1195.57 | 70.63 | 911.65  | 0.76 | Epiphyte    | Shrubland     | Non-endemic |
| <i>Paphiopedilum villosum</i><br><i>var.annanpense</i>  | Xichou   | 880  | 19.65 | 1267.54 | 82.98 | 985.97  | 0.78 | Epiphyte    | Sparse forest | Non-endemic |
| <i>Paphiopedilum villosum</i><br><i>var.yunnanensis</i> | Malipo   | 1200 | 17.06 | 1063.54 | 85.83 | 1053.97 | 0.99 | Epiphyte    | Dense forest  | Endemic     |
| <i>Paphiopedilum villosum</i><br><i>var.yunnanensis</i> | Malipo   | 1800 | 13.46 | 1063.54 | 85.83 | 1053.97 | 0.99 | Epiphyte    | Dense forest  | Endemic     |
| <i>Papilionanthe biswasiana</i>                         | Jinghong | 1800 | 14.92 | 1161.08 | 80.46 | 1256.19 | 1.08 | Epiphyte    | Dense forest  | Non-endemic |
| <i>Papilionanthe biswasiana</i>                         | Menghai  | 1900 | 14.16 | 1314.38 | 80.83 | 1150.91 | 0.88 | Epiphyte    | Dense forest  | Non-endemic |
| <i>Papilionanthe teres</i>                              | Mengla   | 500  | 22.20 | 1514.70 | 84.25 | 1146.68 | 0.76 | Epiphyte    | Dense forest  | Non-endemic |
| <i>Papilionanthe teres</i>                              | Jinghong | 540  | 22.48 | 1161.08 | 80.46 | 1256.19 | 1.08 | Epiphyte    | Dense forest  | Non-endemic |
| <i>Papilionanthe teres</i>                              | Puer     | 570  | 22.84 | 1429.78 | 79.51 | 1123.79 | 0.79 | Epiphyte    | Dense forest  | Non-endemic |
| <i>Papilionanthe teres</i>                              | Jinghong | 670  | 21.70 | 1161.08 | 80.46 | 1256.19 | 1.08 | Epiphyte    | Dense forest  | Non-endemic |

|                                  |             |      |       |         |       |         |      |             |               |             |
|----------------------------------|-------------|------|-------|---------|-------|---------|------|-------------|---------------|-------------|
| <i>Papilionanthe teres</i>       | Mengla      | 760  | 20.64 | 1514.70 | 84.25 | 1146.68 | 0.76 | Epiphyte    | Dense forest  | Non-endemic |
| <i>Papilionanthe teres</i>       | Jinghong    | 900  | 20.32 | 1161.08 | 80.46 | 1256.19 | 1.08 | Epiphyte    | Dense forest  | Non-endemic |
| <i>Parapteroceras elobe</i>      | Mengla      | 1100 | 18.60 | 1514.70 | 84.25 | 1146.68 | 0.76 | Epiphyte    | Forest edge   | Non-endemic |
| <i>Parapteroceras elobe</i>      | Mengla      | 1500 | 16.20 | 1514.70 | 84.25 | 1146.68 | 0.76 | Epiphyte    | Forest edge   | Non-endemic |
| <i>Pecteilis henryi</i>          | Menghai     | 1800 | 14.76 | 1314.38 | 80.83 | 1150.91 | 0.88 | Terrestrial | Meadow        | Non-endemic |
| <i>Pecteilis susannae</i>        | Puer        | 1000 | 20.26 | 1429.78 | 79.51 | 1123.79 | 0.79 | Terrestrial | Sparse forest | Non-endemic |
| <i>Pecteilis susannae</i>        | Shuangjiang | 1500 | 16.98 | 1006.64 | 75.26 | 1272.13 | 1.26 | Terrestrial | Sparse forest | Non-endemic |
| <i>Pecteilis susannae</i>        | Chuxiong    | 1800 | 15.77 | 874.28  | 69.99 | 1192.36 | 1.36 | Terrestrial | Grassy slope  | Non-endemic |
| <i>Pecteilis susannae</i>        | Kunming     | 1950 | 14.58 | 1019.14 | 72.30 | 1197.62 | 1.18 | Terrestrial | Grassy slope  | Non-endemic |
| <i>Pecteilis susannae</i>        | Yangbi      | 2000 | 13.99 | 1044.23 | 72.19 | 1161.15 | 1.11 | Terrestrial | Grassy slope  | Non-endemic |
| <i>Pecteilis susannae</i>        | Tengchong   | 2000 | 13.00 | 1501.45 | 78.06 | 857.93  | 0.57 | Terrestrial | Open site     | Non-endemic |
| <i>Pecteilis susannae</i>        | Eryuan      | 2020 | 14.41 | 745.16  | 68.27 | 1210.94 | 1.63 | Terrestrial | Grassy slope  | Non-endemic |
| <i>Pecteilis susannae</i>        | Yangbi      | 2100 | 13.39 | 1044.23 | 72.19 | 1161.15 | 1.11 | Terrestrial | Open site     | Non-endemic |
| <i>Pecteilis susannae</i>        | Zhongdian   | 2400 | 11.04 | 641.73  | 69.05 | 914.89  | 1.43 | Terrestrial | Grassy slope  | Non-endemic |
| <i>Pecteilis susannae</i>        | Zhongdian   | 2500 | 10.44 | 641.73  | 69.05 | 914.89  | 1.43 | Terrestrial | Dense forest  | Non-endemic |
| <i>Pelatanthe riarivesii</i>     | Mengla      | 600  | 21.60 | 1514.70 | 84.25 | 1146.68 | 0.76 | Epiphyte    | Dense forest  | Non-endemic |
| <i>Pelatanthe riarivesii</i>     | Mengla      | 710  | 20.94 | 1514.70 | 84.25 | 1146.68 | 0.76 | Epiphyte    | Dense forest  | Non-endemic |
| <i>Pelatantheria bicuspidata</i> | Mengla      | 700  | 21.00 | 1514.70 | 84.25 | 1146.68 | 0.76 | Epiphyte    | Dense forest  | Non-endemic |
| <i>Pelatantheria bicuspidata</i> | Mengla      | 800  | 20.40 | 1514.70 | 84.25 | 1146.68 | 0.76 | Epiphyte    | Dense forest  | Non-endemic |
| <i>Peristylus affinis</i>        | Pingbian    | 1300 | 17.02 | 1648.57 | 86.34 | 990.16  | 0.60 | Terrestrial | Open site     | Non-endemic |
| <i>Peristylus affinis</i>        | Fugong      | 1500 | 15.06 | 1441.43 | 79.99 | 906.18  | 0.63 | Terrestrial | Grassy slope  | Non-endemic |
| <i>Peristylus affinis</i>        | Fugong      | 2000 | 12.06 | 1441.43 | 79.99 | 906.18  | 0.63 | Terrestrial | Dense forest  | Non-endemic |
| <i>Peristylus bulleyi</i>        | Dali        | 2400 | 12.42 | 1082.70 | 68.61 | 1256.27 | 1.16 | Terrestrial | Grassy slope  | Non-endemic |
| <i>Peristylus bulleyi</i>        | Jianchuan   | 2500 | 10.55 | 753.13  | 70.16 | 1154.48 | 1.53 | Terrestrial | Dense forest  | Non-endemic |
| <i>Peristylus bulleyi</i>        | Heqing      | 2500 | 11.79 | 977.00  | 65.16 | 1211.84 | 1.24 | Terrestrial | Grassy slope  | Non-endemic |
| <i>Peristylus bulleyi</i>        | Dali        | 2500 | 11.82 | 1082.70 | 68.61 | 1256.27 | 1.16 | Terrestrial | Grassy slope  | Non-endemic |
| <i>Peristylus bulleyi</i>        | Dali        | 2600 | 11.22 | 1082.70 | 68.61 | 1256.27 | 1.16 | Terrestrial | Dense forest  | Non-endemic |
| <i>Peristylus bulleyi</i>        | Heqing      | 2700 | 10.59 | 977.00  | 65.16 | 1211.84 | 1.24 | Terrestrial | Grassy slope  | Non-endemic |
| <i>Peristylus bulleyi</i>        | Dali        | 2700 | 10.62 | 1082.70 | 68.61 | 1256.27 | 1.16 | Terrestrial | Grassy slope  | Non-endemic |
| <i>Peristylus bulleyi</i>        | Dayao       | 2700 | 10.73 | 810.80  | 65.01 | 1427.38 | 1.76 | Terrestrial | Shrubland     | Non-endemic |
| <i>Peristylus bulleyi</i>        | Lijiang     | 2800 | 10.27 | 982.53  | 63.24 | 1077.65 | 1.10 | Terrestrial | Grassy slope  | Non-endemic |
| <i>Peristylus bulleyi</i>        | Dongchuan   | 3200 | 6.63  | 1021.73 | 71.65 | 1186.61 | 1.16 | Terrestrial | Meadow        | Non-endemic |
| <i>Peristylus bulleyi</i>        | Zhongdian   | 3300 | 5.64  | 641.73  | 69.05 | 914.89  | 1.43 | Terrestrial | Grassy slope  | Non-endemic |
| <i>Peristylus bulleyi</i>        | Zhongdian   | 3300 | 5.64  | 641.73  | 69.05 | 914.89  | 1.43 | Terrestrial | Grassy slope  | Non-endemic |
| <i>Peristylus calcaratus</i>     | Gongshan    | 1200 | 16.88 | 1738.42 | 78.47 | 860.43  | 0.50 | Terrestrial | Dense forest  | Non-endemic |
| <i>Peristylus calcaratus</i>     | Gongshan    | 3337 | 4.06  | 1738.42 | 78.47 | 860.43  | 0.50 | Terrestrial | Dense forest  | Non-endemic |



|                               |           |      |       |         |       |         |      |             |               |             |
|-------------------------------|-----------|------|-------|---------|-------|---------|------|-------------|---------------|-------------|
| <i>Peristylus coeloceras</i>  | Deqin     | 2050 | 12.87 | 639.48  | 70.85 | 896.66  | 1.40 | Terrestrial | Forest edge   | Non-endemic |
| <i>Peristylus coeloceras</i>  | Fuyuan    | 2250 | 11.37 | 1084.02 | 74.80 | 1096.10 | 1.01 | Terrestrial | Grassy slope  | Non-endemic |
| <i>Peristylus coeloceras</i>  | Heqing    | 2320 | 12.87 | 977.00  | 65.16 | 1211.84 | 1.24 | Terrestrial | Sparse forest | Non-endemic |
| <i>Peristylus coeloceras</i>  | Huize     | 2340 | 11.33 | 799.98  | 71.46 | 1179.17 | 1.47 | Terrestrial | Meadow        | Non-endemic |
| <i>Peristylus coeloceras</i>  | Lijiang   | 2600 | 11.47 | 982.53  | 63.24 | 1077.65 | 1.10 | Terrestrial | Meadow        | Non-endemic |
| <i>Peristylus coeloceras</i>  | Lijiang   | 2700 | 10.87 | 982.53  | 63.24 | 1077.65 | 1.10 | Terrestrial | Grassy slope  | Non-endemic |
| <i>Peristylus coeloceras</i>  | Lijiang   | 2750 | 10.57 | 982.53  | 63.24 | 1077.65 | 1.10 | Terrestrial | Grassy slope  | Non-endemic |
| <i>Peristylus coeloceras</i>  | Lijiang   | 2800 | 10.27 | 982.53  | 63.24 | 1077.65 | 1.10 | Terrestrial | Grassy slope  | Non-endemic |
| <i>Peristylus coeloceras</i>  | Lijiang   | 2900 | 9.67  | 982.53  | 63.24 | 1077.65 | 1.10 | Terrestrial | Meadow        | Non-endemic |
| <i>Peristylus coeloceras</i>  | Deqin     | 3000 | 7.17  | 639.48  | 70.85 | 896.66  | 1.40 | Terrestrial | Grassy slope  | Non-endemic |
| <i>Peristylus coeloceras</i>  | Eryuan    | 3000 | 8.53  | 745.16  | 68.27 | 1210.94 | 1.63 | Terrestrial | Grassy slope  | Non-endemic |
| <i>Peristylus coeloceras</i>  | Dongchuan | 3000 | 7.83  | 1021.73 | 71.65 | 1186.61 | 1.16 | Terrestrial | Grassy slope  | Non-endemic |
| <i>Peristylus coeloceras</i>  | Zhongdian | 3050 | 7.14  | 641.73  | 69.05 | 914.89  | 1.43 | Terrestrial | Grassy slope  | Non-endemic |
| <i>Peristylus coeloceras</i>  | Zhongdian | 3100 | 6.84  | 641.73  | 69.05 | 914.89  | 1.43 | Terrestrial | Meadow        | Non-endemic |
| <i>Peristylus coeloceras</i>  | Zhongdian | 3100 | 6.84  | 641.73  | 69.05 | 914.89  | 1.43 | Terrestrial | Meadow        | Non-endemic |
| <i>Peristylus coeloceras</i>  | Luquan    | 3190 | 6.58  | 965.09  | 73.60 | 1160.89 | 1.20 | Terrestrial | Grassy slope  | Non-endemic |
| <i>Peristylus coeloceras</i>  | Zhongdian | 3200 | 6.24  | 641.73  | 69.05 | 914.89  | 1.43 | Terrestrial | Grassy slope  | Non-endemic |
| <i>Peristylus coeloceras</i>  | Lijiang   | 3200 | 7.87  | 982.53  | 63.24 | 1077.65 | 1.10 | Terrestrial | Meadow        | Non-endemic |
| <i>Peristylus coeloceras</i>  | Dongchuan | 3200 | 6.63  | 1021.73 | 71.65 | 1186.61 | 1.16 | Terrestrial | Meadow        | Non-endemic |
| <i>Peristylus coeloceras</i>  | Zhongdian | 3250 | 5.94  | 641.73  | 69.05 | 914.89  | 1.43 | Terrestrial | Grassy slope  | Non-endemic |
| <i>Peristylus coeloceras</i>  | Lijiang   | 3300 | 7.27  | 982.53  | 63.24 | 1077.65 | 1.10 | Terrestrial | Grassy slope  | Non-endemic |
| <i>Peristylus coeloceras</i>  | Zhongdian | 3300 | 5.64  | 641.73  | 69.05 | 914.89  | 1.43 | Terrestrial | Meadow        | Non-endemic |
| <i>Peristylus coeloceras</i>  | Lijiang   | 3300 | 7.27  | 982.53  | 63.24 | 1077.65 | 1.10 | Terrestrial | Meadow        | Non-endemic |
| <i>Peristylus coeloceras</i>  | Zhongdian | 3300 | 5.64  | 641.73  | 69.05 | 914.89  | 1.43 | Terrestrial | Meadow        | Non-endemic |
| <i>Peristylus coeloceras</i>  | Zhongdian | 3450 | 4.74  | 641.73  | 69.05 | 914.89  | 1.43 | Terrestrial | Meadow        | Non-endemic |
| <i>Peristylus coeloceras</i>  | Zhongdian | 3600 | 3.84  | 641.73  | 69.05 | 914.89  | 1.43 | Terrestrial | Grassy slope  | Non-endemic |
| <i>Peristylus constrictus</i> | Jinghong  | 700  | 21.52 | 1161.08 | 80.46 | 1256.19 | 1.08 | Terrestrial | Dense forest  | Non-endemic |
| <i>Peristylus constrictus</i> | Zhenkang  | 1700 | 14.64 | 1602.96 | 81.14 | 1089.09 | 0.68 | Terrestrial | Shrubland     | Non-endemic |
| <i>Peristylus constrictus</i> | Binchuan  | 2100 | 14.10 | 573.87  | 62.93 | 1418.42 | 2.47 | Terrestrial | Grassy slope  | Non-endemic |
| <i>Peristylus constrictus</i> | Fengqing  | 2200 | 13.00 | 1352.80 | 73.24 | 1172.52 | 0.87 | Terrestrial | Grassy slope  | Non-endemic |
| <i>Peristylus constrictus</i> | Eryuan    | 2200 | 13.33 | 745.16  | 68.27 | 1210.94 | 1.63 | Terrestrial | Shrubland     | Non-endemic |
| <i>Peristylus densus</i>      | Xichou    | 1500 | 15.93 | 1267.54 | 82.98 | 985.97  | 0.78 | Terrestrial | Dense forest  | Non-endemic |
| <i>Peristylus densus</i>      | Menglian  | 1650 | 15.68 | 1357.68 | 80.47 | 1185.94 | 0.87 | Terrestrial | Grassy slope  | Non-endemic |
| <i>Peristylus densus</i>      | Jingdong  | 1950 | 13.88 | 1128.40 | 76.80 | 1142.11 | 1.01 | Terrestrial | Dense forest  | Non-endemic |
| <i>Peristylus densus</i>      | Binchuan  | 2240 | 13.26 | 573.87  | 62.93 | 1418.42 | 2.47 | Terrestrial | Dense forest  | Non-endemic |
| <i>Peristylus densus</i>      | Heqing    | 2300 | 12.99 | 977.00  | 65.16 | 1211.84 | 1.24 | Terrestrial | Dense forest  | Non-endemic |

|                                |            |      |       |         |       |         |      |             |               |             |
|--------------------------------|------------|------|-------|---------|-------|---------|------|-------------|---------------|-------------|
| <i>Peristylus densus</i>       | Dali       | 3050 | 8.52  | 1082.70 | 68.61 | 1256.27 | 1.16 | Terrestrial | Dense forest  | Non-endemic |
| <i>Peristylus fallax</i>       | Dongchuan  | 3200 | 6.63  | 1021.73 | 71.65 | 1186.61 | 1.16 | Terrestrial | Meadow        | Non-endemic |
| <i>Peristylus fallax</i>       | Luquan     | 3250 | 6.22  | 965.09  | 73.60 | 1160.89 | 1.20 | Terrestrial | Meadow        | Non-endemic |
| <i>Peristylus fallax</i>       | Dali       | 3400 | 6.42  | 1082.70 | 68.61 | 1256.27 | 1.16 | Terrestrial | Meadow        | Non-endemic |
| <i>Peristylus forceps</i>      | Wenshan    | 1050 | 19.36 | 988.87  | 76.70 | 1272.98 | 1.29 | Terrestrial | Grassy slope  | Non-endemic |
| <i>Peristylus forceps</i>      | Mengzi     | 1300 | 18.66 | 855.35  | 71.82 | 1434.56 | 1.68 | Terrestrial | Dense forest  | Non-endemic |
| <i>Peristylus forceps</i>      | Anning     | 1890 | 14.69 | 896.67  | 71.23 | 1167.91 | 1.30 | Terrestrial | Dense forest  | Non-endemic |
| <i>Peristylus forceps</i>      | Eryuan     | 1900 | 15.13 | 745.16  | 68.27 | 1210.94 | 1.63 | Terrestrial | Grassy slope  | Non-endemic |
| <i>Peristylus forceps</i>      | Jianchuan  | 2100 | 12.95 | 753.13  | 70.16 | 1154.48 | 1.53 | Terrestrial | Dense forest  | Non-endemic |
| <i>Peristylus forceps</i>      | Anning     | 2200 | 12.83 | 896.67  | 71.23 | 1167.91 | 1.30 | Terrestrial | Shrubland     | Non-endemic |
| <i>Peristylus forceps</i>      | Heqing     | 2500 | 11.79 | 977.00  | 65.16 | 1211.84 | 1.24 | Terrestrial | Grassy slope  | Non-endemic |
| <i>Peristylus forceps</i>      | Zhongdian  | 2900 | 8.04  | 641.73  | 69.05 | 914.89  | 1.43 | Terrestrial | Grassy slope  | Non-endemic |
| <i>Peristylus forceps</i>      | Zhongdian  | 3300 | 5.64  | 641.73  | 69.05 | 914.89  | 1.43 | Terrestrial | Grassy slope  | Non-endemic |
| <i>Peristylus forceps</i>      | Zhongdian  | 3300 | 5.64  | 641.73  | 69.05 | 914.89  | 1.43 | Terrestrial | Grassy slope  | Non-endemic |
| <i>Peristylus forceps</i>      | Zhongdian  | 3300 | 5.64  | 641.73  | 69.05 | 914.89  | 1.43 | Terrestrial | Meadow        | Non-endemic |
| <i>Peristylus forceps</i>      | Zhongdian  | 3420 | 4.92  | 641.73  | 69.05 | 914.89  | 1.43 | Terrestrial | Meadow        | Non-endemic |
| <i>Peristylus forceps</i>      | Lijiang    | 4000 | 3.07  | 982.53  | 63.24 | 1077.65 | 1.10 | Terrestrial | Grassy slope  | Non-endemic |
| <i>Peristylus forrestii</i>    | Kunming    | 1950 | 14.58 | 1019.14 | 72.30 | 1197.62 | 1.18 | Terrestrial | Grassy slope  | Non-endemic |
| <i>Peristylus forrestii</i>    | Lijiang    | 2450 | 12.37 | 982.53  | 63.24 | 1077.65 | 1.10 | Terrestrial | Dense forest  | Non-endemic |
| <i>Peristylus goodyeroides</i> | Funing     | 300  | 21.82 | 1161.58 | 79.07 | 1147.17 | 0.99 | Terrestrial | Grassy slope  | Non-endemic |
| <i>Peristylus goodyeroides</i> | Malipo     | 1000 | 18.26 | 1063.54 | 85.83 | 1053.97 | 0.99 | Terrestrial | Shrubland     | Non-endemic |
| <i>Peristylus goodyeroides</i> | Jingdong   | 1380 | 17.30 | 1128.40 | 76.80 | 1142.11 | 1.01 | Terrestrial | Grassy slope  | Non-endemic |
| <i>Peristylus goodyeroides</i> | Jiangcheng | 1450 | 16.43 | 2264.27 | 84.63 | 1061.90 | 0.47 | Terrestrial | Grassy slope  | Non-endemic |
| <i>Peristylus goodyeroides</i> | Yangbi     | 2100 | 13.39 | 1044.23 | 72.19 | 1161.15 | 1.11 | Terrestrial | Grassy slope  | Non-endemic |
| <i>Peristylus goodyeroides</i> | Zhongdian  | 2150 | 12.54 | 641.73  | 69.05 | 914.89  | 1.43 | Terrestrial | Grassy slope  | Non-endemic |
| <i>Peristylus jinchuanicus</i> | Lijiang    | 2800 | 10.27 | 982.53  | 63.24 | 1077.65 | 1.10 | Terrestrial | Meadow        | Non-endemic |
| <i>Peristylus jinchuanicus</i> | Dongchuan  | 3200 | 6.63  | 1021.73 | 71.65 | 1186.61 | 1.16 | Terrestrial | Meadow        | Non-endemic |
| <i>Peristylus jinchuanicus</i> | Zhongdian  | 3300 | 5.64  | 641.73  | 69.05 | 914.89  | 1.43 | Terrestrial | Open site     | Non-endemic |
| <i>Peristylus lacertiferus</i> | Jinghong   | 1000 | 19.72 | 1161.08 | 80.46 | 1256.19 | 1.08 | Terrestrial | Dense forest  | Non-endemic |
| <i>Peristylus lacertiferus</i> | Puer       | 1000 | 20.26 | 1429.78 | 79.51 | 1123.79 | 0.79 | Terrestrial | Sparse forest | Non-endemic |
| <i>Peristylus lacertiferus</i> | Jinghong   | 1200 | 18.52 | 1161.08 | 80.46 | 1256.19 | 1.08 | Terrestrial | Forest edge   | Non-endemic |
| <i>Peristylus lacertiferus</i> | Jinghong   | 1270 | 18.10 | 1161.08 | 80.46 | 1256.19 | 1.08 | Terrestrial | Shrubland     | Non-endemic |
| <i>Peristylus mannii</i>       | Kunming    | 1840 | 15.24 | 1019.14 | 72.30 | 1197.62 | 1.18 | Terrestrial | Shrubland     | Non-endemic |
| <i>Peristylus mannii</i>       | Lincang    | 1850 | 15.42 | 1165.84 | 72.08 | 1167.73 | 1.00 | Terrestrial | Grassy slope  | Non-endemic |
| <i>Peristylus mannii</i>       | Eshan      | 1890 | 13.87 | 938.39  | 78.62 | 1123.48 | 1.20 | Terrestrial | Grassy slope  | Non-endemic |
| <i>Peristylus mannii</i>       | Kunming    | 1900 | 14.88 | 1019.14 | 72.30 | 1197.62 | 1.18 | Terrestrial | Sparse forest | Non-endemic |

|                                |           |      |       |         |       |         |      |             |               |             |
|--------------------------------|-----------|------|-------|---------|-------|---------|------|-------------|---------------|-------------|
| <i>Peristylus mannii</i>       | Kunming   | 1930 | 14.70 | 1019.14 | 72.30 | 1197.62 | 1.18 | Terrestrial | Dense forest  | Non-endemic |
| <i>Peristylus mannii</i>       | Jingdong  | 1950 | 13.88 | 1128.40 | 76.80 | 1142.11 | 1.01 | Terrestrial | Dense forest  | Non-endemic |
| <i>Peristylus mannii</i>       | Kunming   | 2010 | 14.22 | 1019.14 | 72.30 | 1197.62 | 1.18 | Terrestrial | Grassy slope  | Non-endemic |
| <i>Peristylus mannii</i>       | Songming  | 2200 | 12.39 | 1010.18 | 74.14 | 1134.24 | 1.12 | Terrestrial | Shrubland     | Non-endemic |
| <i>Peristylus mannii</i>       | Kunming   | 2400 | 11.88 | 1019.14 | 72.30 | 1197.62 | 1.18 | Terrestrial | Grassy slope  | Non-endemic |
| <i>Peristylus mannii</i>       | Lijiang   | 2500 | 12.07 | 982.53  | 63.24 | 1077.65 | 1.10 | Terrestrial | Dense forest  | Non-endemic |
| <i>Peristylus mannii</i>       | Yangbi    | 2500 | 10.99 | 1044.23 | 72.19 | 1161.15 | 1.11 | Terrestrial | Grassy slope  | Non-endemic |
| <i>Peristylus mannii</i>       | Luquan    | 2500 | 10.72 | 965.09  | 73.60 | 1160.89 | 1.20 | Terrestrial | Sparse forest | Non-endemic |
| <i>Peristylus mannii</i>       | Jingdong  | 2600 | 9.98  | 1128.40 | 76.80 | 1142.11 | 1.01 | Terrestrial | Grassy slope  | Non-endemic |
| <i>Peristylus mannii</i>       | Yangbi    | 2700 | 9.79  | 1044.23 | 72.19 | 1161.15 | 1.11 | Terrestrial | Dense forest  | Non-endemic |
| <i>Peristylus neotineoides</i> | Gongshan  | 1800 | 13.28 | 1738.42 | 78.47 | 860.43  | 0.50 | Terrestrial | Dense forest  | Non-endemic |
| <i>Peristylus neotineoides</i> | Zhongdian | 3300 | 5.64  | 641.73  | 69.05 | 914.89  | 1.43 | Terrestrial | Grassy slope  | Non-endemic |
| <i>Peristylus parishii</i>     | Menghai   | 1450 | 16.86 | 1314.38 | 80.83 | 1150.91 | 0.88 | Terrestrial | Dense forest  | Non-endemic |
| <i>Peristylus tentaculatus</i> | Cangyuan  | 1200 | 18.02 | 1733.34 | 81.63 | 1060.82 | 0.61 | Terrestrial | Forest edge   | Non-endemic |
| <i>Peristylus tentaculatus</i> | Gongshan  | 1200 | 16.88 | 1738.42 | 78.47 | 860.43  | 0.50 | Terrestrial | Grassy slope  | Non-endemic |
| <i>Peristylus tentaculatus</i> | Jinping   | 1340 | 17.45 | 2305.17 | 83.81 | 1030.46 | 0.45 | Terrestrial | Grassy slope  | Non-endemic |
| <i>Phaius flavus</i>           | Gejiu     | 700  | 22.11 | 1100.28 | 77.18 | 1242.17 | 1.13 | Terrestrial | Dense forest  | Non-endemic |
| <i>Phaius flavus</i>           | Mengla    | 820  | 20.28 | 1514.70 | 84.25 | 1146.68 | 0.76 | Terrestrial | Dense forest  | Non-endemic |
| <i>Phaius flavus</i>           | Xichou    | 920  | 19.41 | 1267.54 | 82.98 | 985.97  | 0.78 | Terrestrial | Dense forest  | Non-endemic |
| <i>Phaius flavus</i>           | Funing    | 1000 | 17.62 | 1161.58 | 79.07 | 1147.17 | 0.99 | Terrestrial | Dense forest  | Non-endemic |
| <i>Phaius flavus</i>           | Gejiu     | 1000 | 20.31 | 1100.28 | 77.18 | 1242.17 | 1.13 | Terrestrial | Dense forest  | Non-endemic |
| <i>Phaius flavus</i>           | Guangnan  | 1330 | 16.27 | 1044.26 | 78.94 | 1090.35 | 1.04 | Terrestrial | Open site     | Non-endemic |
| <i>Phaius flavus</i>           | Xichou    | 1350 | 16.83 | 1267.54 | 82.98 | 985.97  | 0.78 | Terrestrial | Dense forest  | Non-endemic |
| <i>Phaius flavus</i>           | Jinghong  | 1400 | 17.32 | 1161.08 | 80.46 | 1256.19 | 1.08 | Terrestrial | Shrubland     | Non-endemic |
| <i>Phaius flavus</i>           | Malipo    | 1600 | 14.66 | 1063.54 | 85.83 | 1053.97 | 0.99 | Terrestrial | Dense forest  | Non-endemic |
| <i>Phaius flavus</i>           | Fugong    | 2100 | 11.46 | 1441.43 | 79.99 | 906.18  | 0.63 | Terrestrial | Dense forest  | Non-endemic |
| <i>Phaius flavus</i>           | Weixi     | 2200 | 12.23 | 970.70  | 69.95 | 1021.03 | 1.05 | Terrestrial | Dense forest  | Non-endemic |
| <i>Phaius flavus</i>           | Gongshan  | 2500 | 9.08  | 1738.42 | 78.47 | 860.43  | 0.50 | Terrestrial | Dense forest  | Non-endemic |
| <i>Phaius longicruris</i>      | Jinghong  | 1400 | 17.32 | 1161.08 | 80.46 | 1256.19 | 1.08 | Terrestrial | Shrubland     | Endemic     |
| <i>Phaius mishmensis</i>       | Hekou     | 330  | 21.77 | 1768.58 | 84.25 | 1166.26 | 0.66 | Terrestrial | Dense forest  | Non-endemic |
| <i>Phaius mishmensis</i>       | Xichou    | 1000 | 18.93 | 1267.54 | 82.98 | 985.97  | 0.78 | Terrestrial | Dense forest  | Non-endemic |
| <i>Phaius mishmensis</i>       | Xichou    | 1300 | 17.13 | 1267.54 | 82.98 | 985.97  | 0.78 | Terrestrial | Dense forest  | Non-endemic |
| <i>Phaius mishmensis</i>       | Jianshui  | 1430 | 17.97 | 793.10  | 71.73 | 1413.81 | 1.78 | Terrestrial | Dense forest  | Non-endemic |
| <i>Phaius tankervilleae</i>    | Jinping   | 500  | 22.49 | 2305.17 | 83.81 | 1030.46 | 0.45 | Terrestrial | Dense forest  | Non-endemic |
| <i>Phaius tankervilleae</i>    | Puer      | 850  | 21.16 | 1429.78 | 79.51 | 1123.79 | 0.79 | Terrestrial | Forest edge   | Non-endemic |
| <i>Phaius tankervilleae</i>    | Hekou     | 900  | 18.35 | 1768.58 | 84.25 | 1166.26 | 0.66 | Terrestrial | Forest edge   | Non-endemic |

|                                 |             |      |       |         |       |         |      |             |               |             |
|---------------------------------|-------------|------|-------|---------|-------|---------|------|-------------|---------------|-------------|
| <i>Phaius tankervilleae</i>     | Gejiu       | 1000 | 20.31 | 1100.28 | 77.18 | 1242.17 | 1.13 | Terrestrial | Open site     | Non-endemic |
| <i>Phaius tankervilleae</i>     | Jinghong    | 1100 | 19.12 | 1161.08 | 80.46 | 1256.19 | 1.08 | Terrestrial | Dense forest  | Non-endemic |
| <i>Phaius tankervilleae</i>     | Lushui      | 1300 | 18.25 | 1195.57 | 70.63 | 911.65  | 0.76 | Terrestrial | Grassy slope  | Non-endemic |
| <i>Phaius tankervilleae</i>     | Malipo      | 1400 | 15.86 | 1063.54 | 85.83 | 1053.97 | 0.99 | Terrestrial | Dense forest  | Non-endemic |
| <i>Phaius tankervilleae</i>     | Malipo      | 1400 | 15.86 | 1063.54 | 85.83 | 1053.97 | 0.99 | Terrestrial | Dense forest  | Non-endemic |
| <i>Phaius tankervilleae</i>     | Shuangjiang | 1480 | 17.10 | 1006.64 | 75.26 | 1272.13 | 1.26 | Terrestrial | Grassy slope  | Non-endemic |
| <i>Phaius tankervilleae</i>     | Xichou      | 1500 | 15.93 | 1267.54 | 82.98 | 985.97  | 0.78 | Terrestrial | Shrubland     | Non-endemic |
| <i>Phaius tankervilleae</i>     | Zhenkang    | 1600 | 15.24 | 1602.96 | 81.14 | 1089.09 | 0.68 | Terrestrial | Dense forest  | Non-endemic |
| <i>Phaius tankervilleae</i>     | Jingdong    | 1600 | 15.98 | 1128.40 | 76.80 | 1142.11 | 1.01 | Terrestrial | Dense forest  | Non-endemic |
| <i>Phaius tankervilleae</i>     | Fugong      | 1900 | 12.66 | 1441.43 | 79.99 | 906.18  | 0.63 | Terrestrial | Shrubland     | Non-endemic |
| <i>Phalaenopsis hainanensis</i> | Xichou      | 1200 | 17.73 | 1267.54 | 82.98 | 985.97  | 0.78 | Epiphyte    | Dense forest  | Non-endemic |
| <i>Phalaenopsis mannii</i>      | Mengla      | 850  | 20.10 | 1514.70 | 84.25 | 1146.68 | 0.76 | Epiphyte    | Forest edge   | Non-endemic |
| <i>Phalaenopsis mannii</i>      | Mengla      | 1350 | 17.10 | 1514.70 | 84.25 | 1146.68 | 0.76 | Epiphyte    | Forest edge   | Non-endemic |
| <i>Phalaenopsis stobariana</i>  | Yingjiang   | 1350 | 16.29 | 1505.33 | 79.98 | 1158.19 | 0.77 | Epiphyte    | Dense forest  | Endemic     |
| <i>Phalaenopsis wilsonii</i>    | Malipo      | 1500 | 15.26 | 1063.54 | 85.83 | 1053.97 | 0.99 | Epiphyte    | Dense forest  | Non-endemic |
| <i>Phalaenopsis wilsonii</i>    | Lijiang     | 2990 | 9.13  | 982.53  | 63.24 | 1077.65 | 1.10 | Epiphyte    | Dense forest  | Non-endemic |
| <i>Pholidota articulata</i>     | Jinghong    | 900  | 20.32 | 1161.08 | 80.46 | 1256.19 | 1.08 | Epiphyte    | Sparse forest | Non-endemic |
| <i>Pholidota articulata</i>     | Zhenkang    | 1000 | 18.84 | 1602.96 | 81.14 | 1089.09 | 0.68 | Epiphyte    | Dense forest  | Non-endemic |
| <i>Pholidota articulata</i>     | Xichou      | 1080 | 18.45 | 1267.54 | 82.98 | 985.97  | 0.78 | Epiphyte    | Dense forest  | Non-endemic |
| <i>Pholidota articulata</i>     | Pingbian    | 1300 | 17.02 | 1648.57 | 86.34 | 990.16  | 0.60 | Epiphyte    | Dense forest  | Non-endemic |
| <i>Pholidota articulata</i>     | Menghai     | 1300 | 17.76 | 1314.38 | 80.83 | 1150.91 | 0.88 | Epiphyte    | Forest edge   | Non-endemic |
| <i>Pholidota articulata</i>     | Jinghong    | 1350 | 17.62 | 1161.08 | 80.46 | 1256.19 | 1.08 | Epiphyte    | Dense forest  | Non-endemic |
| <i>Pholidota articulata</i>     | Menghai     | 1500 | 16.56 | 1314.38 | 80.83 | 1150.91 | 0.88 | Epiphyte    | Dense forest  | Non-endemic |
| <i>Pholidota articulata</i>     | Menghai     | 1500 | 16.56 | 1314.38 | 80.83 | 1150.91 | 0.88 | Epiphyte    | Dense forest  | Non-endemic |
| <i>Pholidota articulata</i>     | Yongde      | 1520 | 18.01 | 1266.25 | 69.00 | 1283.63 | 1.01 | Epiphyte    | Forest edge   | Non-endemic |
| <i>Pholidota articulata</i>     | Menghai     | 1540 | 16.32 | 1314.38 | 80.83 | 1150.91 | 0.88 | Epiphyte    | Dense forest  | Non-endemic |
| <i>Pholidota articulata</i>     | Yingjiang   | 1600 | 14.79 | 1505.33 | 79.98 | 1158.19 | 0.77 | Epiphyte    | Dense forest  | Non-endemic |
| <i>Pholidota articulata</i>     | Gongshan    | 1600 | 14.48 | 1738.42 | 78.47 | 860.43  | 0.50 | Epiphyte    | Forest edge   | Non-endemic |
| <i>Pholidota articulata</i>     | Gongshan    | 1600 | 14.48 | 1738.42 | 78.47 | 860.43  | 0.50 | Epiphyte    | Grassy slope  | Non-endemic |
| <i>Pholidota articulata</i>     | Menghai     | 1600 | 15.96 | 1314.38 | 80.83 | 1150.91 | 0.88 | Epiphyte    | Shrubland     | Non-endemic |
| <i>Pholidota articulata</i>     | Shuangjiang | 1600 | 16.38 | 1006.64 | 75.26 | 1272.13 | 1.26 | Epiphyte    | Sparse forest | Non-endemic |
| <i>Pholidota articulata</i>     | Gongshan    | 1650 | 14.18 | 1738.42 | 78.47 | 860.43  | 0.50 | Epiphyte    | Dense forest  | Non-endemic |
| <i>Pholidota articulata</i>     | Fengqing    | 1680 | 16.12 | 1352.80 | 73.24 | 1172.52 | 0.87 | Epiphyte    | Dense forest  | Non-endemic |
| <i>Pholidota articulata</i>     | Fengqing    | 1700 | 16.00 | 1352.80 | 73.24 | 1172.52 | 0.87 | Epiphyte    | Dense forest  | Non-endemic |
| <i>Pholidota articulata</i>     | Gongshan    | 1700 | 13.88 | 1738.42 | 78.47 | 860.43  | 0.50 | Epiphyte    | Forest edge   | Non-endemic |
| <i>Pholidota articulata</i>     | Gongshan    | 1730 | 13.70 | 1738.42 | 78.47 | 860.43  | 0.50 | Epiphyte    | Dense forest  | Non-endemic |

|                             |             |      |       |         |       |         |      |          |               |             |
|-----------------------------|-------------|------|-------|---------|-------|---------|------|----------|---------------|-------------|
| <i>Pholidota articulata</i> | Luxi        | 1750 | 14.58 | 1650.33 | 79.33 | 1183.39 | 0.72 | Epiphyte | Dense forest  | Non-endemic |
| <i>Pholidota articulata</i> | Luxi        | 1750 | 14.58 | 1650.33 | 79.33 | 1183.39 | 0.72 | Epiphyte | Dense forest  | Non-endemic |
| <i>Pholidota articulata</i> | Longling    | 1800 | 13.32 | 2098.66 | 84.65 | 973.45  | 0.46 | Epiphyte | Dense forest  | Non-endemic |
| <i>Pholidota articulata</i> | Menghai     | 1800 | 14.76 | 1314.38 | 80.83 | 1150.91 | 0.88 | Epiphyte | Dense forest  | Non-endemic |
| <i>Pholidota articulata</i> | Jingdong    | 1800 | 14.78 | 1128.40 | 76.80 | 1142.11 | 1.01 | Epiphyte | Dense forest  | Non-endemic |
| <i>Pholidota articulata</i> | Gongshan    | 1800 | 13.28 | 1738.42 | 78.47 | 860.43  | 0.50 | Epiphyte | Forest edge   | Non-endemic |
| <i>Pholidota articulata</i> | Weixi       | 1900 | 14.03 | 970.70  | 69.95 | 1021.03 | 1.05 | Epiphyte | Forest edge   | Non-endemic |
| <i>Pholidota articulata</i> | Jingdong    | 1950 | 13.88 | 1128.40 | 76.80 | 1142.11 | 1.01 | Epiphyte | Dense forest  | Non-endemic |
| <i>Pholidota articulata</i> | Jingdong    | 1950 | 13.88 | 1128.40 | 76.80 | 1142.11 | 1.01 | Epiphyte | Dense forest  | Non-endemic |
| <i>Pholidota articulata</i> | Jingdong    | 1950 | 13.88 | 1128.40 | 76.80 | 1142.11 | 1.01 | Epiphyte | Grassy slope  | Non-endemic |
| <i>Pholidota articulata</i> | Yongde      | 1970 | 15.31 | 1266.25 | 69.00 | 1283.63 | 1.01 | Epiphyte | Dense forest  | Non-endemic |
| <i>Pholidota articulata</i> | Gongshan    | 2000 | 12.08 | 1738.42 | 78.47 | 860.43  | 0.50 | Epiphyte | Dense forest  | Non-endemic |
| <i>Pholidota articulata</i> | Fugong      | 2000 | 12.06 | 1441.43 | 79.99 | 906.18  | 0.63 | Epiphyte | Dense forest  | Non-endemic |
| <i>Pholidota articulata</i> | Yingjiang   | 2030 | 12.21 | 1505.33 | 79.98 | 1158.19 | 0.77 | Epiphyte | Dense forest  | Non-endemic |
| <i>Pholidota articulata</i> | Jingdong    | 2050 | 13.28 | 1128.40 | 76.80 | 1142.11 | 1.01 | Epiphyte | Dense forest  | Non-endemic |
| <i>Pholidota articulata</i> | Yongde      | 2100 | 14.53 | 1266.25 | 69.00 | 1283.63 | 1.01 | Epiphyte | Dense forest  | Non-endemic |
| <i>Pholidota articulata</i> | Fengqing    | 2100 | 13.60 | 1352.80 | 73.24 | 1172.52 | 0.87 | Epiphyte | Dense forest  | Non-endemic |
| <i>Pholidota articulata</i> | Shuangjiang | 2100 | 13.38 | 1006.64 | 75.26 | 1272.13 | 1.26 | Epiphyte | Forest edge   | Non-endemic |
| <i>Pholidota articulata</i> | Jingdong    | 2200 | 12.38 | 1128.40 | 76.80 | 1142.11 | 1.01 | Epiphyte | Dense forest  | Non-endemic |
| <i>Pholidota articulata</i> | Jingdong    | 2200 | 12.38 | 1128.40 | 76.80 | 1142.11 | 1.01 | Epiphyte | Dense forest  | Non-endemic |
| <i>Pholidota articulata</i> | Lincang     | 2300 | 12.72 | 1165.84 | 72.08 | 1167.73 | 1.00 | Epiphyte | Dense forest  | Non-endemic |
| <i>Pholidota articulata</i> | Yangbi      | 2350 | 11.89 | 1044.23 | 72.19 | 1161.15 | 1.11 | Epiphyte | Dense forest  | Non-endemic |
| <i>Pholidota articulata</i> | Jingdong    | 2400 | 11.18 | 1128.40 | 76.80 | 1142.11 | 1.01 | Epiphyte | Dense forest  | Non-endemic |
| <i>Pholidota articulata</i> | Longling    | 2400 | 9.72  | 2098.66 | 84.65 | 973.45  | 0.46 | Epiphyte | Dense forest  | Non-endemic |
| <i>Pholidota articulata</i> | Gongshan    | 2400 | 9.68  | 1738.42 | 78.47 | 860.43  | 0.50 | Epiphyte | Dense forest  | Non-endemic |
| <i>Pholidota articulata</i> | Fengqing    | 2450 | 11.50 | 1352.80 | 73.24 | 1172.52 | 0.87 | Epiphyte | Dense forest  | Non-endemic |
| <i>Pholidota articulata</i> | Yongde      | 2500 | 12.13 | 1266.25 | 69.00 | 1283.63 | 1.01 | Epiphyte | Dense forest  | Non-endemic |
| <i>Pholidota articulata</i> | Zhenkang    | 2700 | 8.64  | 1602.96 | 81.14 | 1089.09 | 0.68 | Epiphyte | Dense forest  | Non-endemic |
| <i>Pholidota bracteata</i>  | Gengma      | 1200 | 18.04 | 1327.70 | 77.28 | 1181.78 | 0.89 | Epiphyte | Dense forest  | Non-endemic |
| <i>Pholidota bracteata</i>  | Jinghong    | 1300 | 17.92 | 1161.08 | 80.46 | 1256.19 | 1.08 | Epiphyte | Sparse forest | Non-endemic |
| <i>Pholidota chinensis</i>  | Pingbian    | 800  | 20.02 | 1648.57 | 86.34 | 990.16  | 0.60 | Epiphyte | Dense forest  | Non-endemic |
| <i>Pholidota chinensis</i>  | Pingbian    | 900  | 19.42 | 1648.57 | 86.34 | 990.16  | 0.60 | Epiphyte | Dense forest  | Non-endemic |
| <i>Pholidota chinensis</i>  | Malipo      | 1000 | 18.26 | 1063.54 | 85.83 | 1053.97 | 0.99 | Epiphyte | Dense forest  | Non-endemic |
| <i>Pholidota chinensis</i>  | Malipo      | 1150 | 17.36 | 1063.54 | 85.83 | 1053.97 | 0.99 | Epiphyte | Dense forest  | Non-endemic |
| <i>Pholidota chinensis</i>  | Pingbian    | 1240 | 17.38 | 1648.57 | 86.34 | 990.16  | 0.60 | Epiphyte | Dense forest  | Non-endemic |
| <i>Pholidota chinensis</i>  | Pingbian    | 1300 | 17.02 | 1648.57 | 86.34 | 990.16  | 0.60 | Epiphyte | Dense forest  | Non-endemic |

|                            |          |      |       |         |       |         |      |          |               |             |
|----------------------------|----------|------|-------|---------|-------|---------|------|----------|---------------|-------------|
| <i>Pholidota chinensis</i> | Xichou   | 1300 | 17.13 | 1267.54 | 82.98 | 985.97  | 0.78 | Epiphyte | Dense forest  | Non-endemic |
| <i>Pholidota chinensis</i> | Xichou   | 1350 | 16.83 | 1267.54 | 82.98 | 985.97  | 0.78 | Epiphyte | Dense forest  | Non-endemic |
| <i>Pholidota chinensis</i> | Gongshan | 1500 | 15.08 | 1738.42 | 78.47 | 860.43  | 0.50 | Epiphyte | Dense forest  | Non-endemic |
| <i>Pholidota chinensis</i> | Malipo   | 1500 | 15.26 | 1063.54 | 85.83 | 1053.97 | 0.99 | Epiphyte | Dense forest  | Non-endemic |
| <i>Pholidota chinensis</i> | Pingbian | 1600 | 15.22 | 1648.57 | 86.34 | 990.16  | 0.60 | Epiphyte | Dense forest  | Non-endemic |
| <i>Pholidota chinensis</i> | Malipo   | 1600 | 14.66 | 1063.54 | 85.83 | 1053.97 | 0.99 | Epiphyte | Dense forest  | Non-endemic |
| <i>Pholidota chinensis</i> | Lancang  | 2100 | 13.10 | 1596.50 | 77.88 | 1183.80 | 0.74 | Epiphyte | Dense forest  | Non-endemic |
| <i>Pholidota imbricata</i> | Mengla   | 800  | 20.40 | 1514.70 | 84.25 | 1146.68 | 0.76 | Epiphyte | Dense forest  | Non-endemic |
| <i>Pholidota imbricata</i> | Jinghong | 830  | 20.74 | 1161.08 | 80.46 | 1256.19 | 1.08 | Epiphyte | Dense forest  | Non-endemic |
| <i>Pholidota imbricata</i> | Jinghong | 1000 | 19.72 | 1161.08 | 80.46 | 1256.19 | 1.08 | Epiphyte | Dense forest  | Non-endemic |
| <i>Pholidota imbricata</i> | Menghai  | 1000 | 19.56 | 1314.38 | 80.83 | 1150.91 | 0.88 | Epiphyte | Shrubland     | Non-endemic |
| <i>Pholidota imbricata</i> | Jinghong | 1100 | 19.12 | 1161.08 | 80.46 | 1256.19 | 1.08 | Epiphyte | Dense forest  | Non-endemic |
| <i>Pholidota imbricata</i> | Jinghong | 1100 | 19.12 | 1161.08 | 80.46 | 1256.19 | 1.08 | Epiphyte | Dense forest  | Non-endemic |
| <i>Pholidota imbricata</i> | Menghai  | 1100 | 18.96 | 1314.38 | 80.83 | 1150.91 | 0.88 | Epiphyte | Dense forest  | Non-endemic |
| <i>Pholidota imbricata</i> | Menghai  | 1250 | 18.06 | 1314.38 | 80.83 | 1150.91 | 0.88 | Epiphyte | Sparse forest | Non-endemic |
| <i>Pholidota imbricata</i> | Menghai  | 1300 | 17.76 | 1314.38 | 80.83 | 1150.91 | 0.88 | Epiphyte | Dense forest  | Non-endemic |
| <i>Pholidota imbricata</i> | Menghai  | 1300 | 17.76 | 1314.38 | 80.83 | 1150.91 | 0.88 | Epiphyte | Sparse forest | Non-endemic |
| <i>Pholidota imbricata</i> | Gongshan | 1320 | 16.16 | 1738.42 | 78.47 | 860.43  | 0.50 | Epiphyte | Dense forest  | Non-endemic |
| <i>Pholidota imbricata</i> | Menghai  | 1340 | 17.52 | 1314.38 | 80.83 | 1150.91 | 0.88 | Epiphyte | Dense forest  | Non-endemic |
| <i>Pholidota imbricata</i> | Menghai  | 1340 | 17.52 | 1314.38 | 80.83 | 1150.91 | 0.88 | Epiphyte | Dense forest  | Non-endemic |
| <i>Pholidota imbricata</i> | Jinghong | 1350 | 17.62 | 1161.08 | 80.46 | 1256.19 | 1.08 | Epiphyte | Dense forest  | Non-endemic |
| <i>Pholidota imbricata</i> | Gongshan | 1400 | 15.68 | 1738.42 | 78.47 | 860.43  | 0.50 | Epiphyte | Dense forest  | Non-endemic |
| <i>Pholidota imbricata</i> | Menghai  | 1400 | 17.16 | 1314.38 | 80.83 | 1150.91 | 0.88 | Epiphyte | Dense forest  | Non-endemic |
| <i>Pholidota imbricata</i> | Gongshan | 1450 | 15.38 | 1738.42 | 78.47 | 860.43  | 0.50 | Epiphyte | Dense forest  | Non-endemic |
| <i>Pholidota imbricata</i> | Menghai  | 1500 | 16.56 | 1314.38 | 80.83 | 1150.91 | 0.88 | Epiphyte | Shrubland     | Non-endemic |
| <i>Pholidota imbricata</i> | Jinghong | 1500 | 16.72 | 1161.08 | 80.46 | 1256.19 | 1.08 | Epiphyte | Shrubland     | Non-endemic |
| <i>Pholidota imbricata</i> | Menghai  | 1540 | 16.32 | 1314.38 | 80.83 | 1150.91 | 0.88 | Epiphyte | Dense forest  | Non-endemic |
| <i>Pholidota imbricata</i> | Menghai  | 1550 | 16.26 | 1314.38 | 80.83 | 1150.91 | 0.88 | Epiphyte | Dense forest  | Non-endemic |
| <i>Pholidota imbricata</i> | Menghai  | 1550 | 16.26 | 1314.38 | 80.83 | 1150.91 | 0.88 | Epiphyte | Dense forest  | Non-endemic |
| <i>Pholidota imbricata</i> | Menghai  | 1600 | 15.96 | 1314.38 | 80.83 | 1150.91 | 0.88 | Epiphyte | Shrubland     | Non-endemic |
| <i>Pholidota imbricata</i> | Gongshan | 1620 | 14.36 | 1738.42 | 78.47 | 860.43  | 0.50 | Epiphyte | Shrubland     | Non-endemic |
| <i>Pholidota imbricata</i> | Zhenkang | 1640 | 15.00 | 1602.96 | 81.14 | 1089.09 | 0.68 | Epiphyte | Dense forest  | Non-endemic |
| <i>Pholidota imbricata</i> | Menghai  | 1650 | 15.66 | 1314.38 | 80.83 | 1150.91 | 0.88 | Epiphyte | Dense forest  | Non-endemic |
| <i>Pholidota imbricata</i> | Yangbi   | 1680 | 15.91 | 1044.23 | 72.19 | 1161.15 | 1.11 | Epiphyte | Shrubland     | Non-endemic |
| <i>Pholidota imbricata</i> | Gengma   | 1700 | 15.47 | 1327.70 | 77.28 | 1181.78 | 0.89 | Epiphyte | Dense forest  | Non-endemic |
| <i>Pholidota imbricata</i> | Fengqing | 1700 | 16.00 | 1352.80 | 73.24 | 1172.52 | 0.87 | Epiphyte | Dense forest  | Non-endemic |

|                                 |           |      |       |         |       |         |      |          |              |             |
|---------------------------------|-----------|------|-------|---------|-------|---------|------|----------|--------------|-------------|
| <i>Pholidota imbricata</i>      | Luxi      | 1750 | 14.58 | 1650.33 | 79.33 | 1183.39 | 0.72 | Epiphyte | Dense forest | Non-endemic |
| <i>Pholidota imbricata</i>      | Gongshan  | 1800 | 13.28 | 1738.42 | 78.47 | 860.43  | 0.50 | Epiphyte | Shrubland    | Non-endemic |
| <i>Pholidota imbricata</i>      | Jinghong  | 1900 | 14.32 | 1161.08 | 80.46 | 1256.19 | 1.08 | Epiphyte | Dense forest | Non-endemic |
| <i>Pholidota imbricata</i>      | Menghai   | 1950 | 13.86 | 1314.38 | 80.83 | 1150.91 | 0.88 | Epiphyte | Dense forest | Non-endemic |
| <i>Pholidota imbricata</i>      | Eryuan    | 2150 | 13.63 | 745.16  | 68.27 | 1210.94 | 1.63 | Epiphyte | Forest edge  | Non-endemic |
| <i>Pholidota imbricata</i>      | Jingdong  | 2200 | 12.38 | 1128.40 | 76.80 | 1142.11 | 1.01 | Epiphyte | Dense forest | Non-endemic |
| <i>Pholidota imbricata</i>      | Menglian  | 2200 | 12.38 | 1357.68 | 80.47 | 1185.94 | 0.87 | Epiphyte | Dense forest | Non-endemic |
| <i>Pholidota imbricata</i>      | Lincang   | 2300 | 12.72 | 1165.84 | 72.08 | 1167.73 | 1.00 | Epiphyte | Dense forest | Non-endemic |
| <i>Pholidota imbricata</i>      | Lijiang   | 2430 | 12.49 | 982.53  | 63.24 | 1077.65 | 1.10 | Epiphyte | Dense forest | Non-endemic |
| <i>Pholidota imbricata</i>      | Longling  | 2800 | 7.32  | 2098.66 | 84.65 | 973.45  | 0.46 | Epiphyte | Dense forest | Non-endemic |
| <i>Pholidota longipes</i>       | Xichou    | 1000 | 18.93 | 1267.54 | 82.98 | 985.97  | 0.78 | Epiphyte | Dense forest | Endemic     |
| <i>Pholidota longipes</i>       | Xichou    | 1400 | 16.53 | 1267.54 | 82.98 | 985.97  | 0.78 | Epiphyte | Dense forest | Endemic     |
| <i>Pholidota longipes</i>       | Xichou    | 1650 | 15.03 | 1267.54 | 82.98 | 985.97  | 0.78 | Epiphyte | Dense forest | Endemic     |
| <i>Pholidota longipes</i>       | Malipo    | 2000 | 12.26 | 1063.54 | 85.83 | 1053.97 | 0.99 | Epiphyte | Dense forest | Endemic     |
| <i>Pholidota missionariorum</i> | Yanshan   | 1100 | 18.86 | 1003.57 | 79.42 | 1172.21 | 1.17 | Epiphyte | Dense forest | Non-endemic |
| <i>Pholidota missionariorum</i> | Pingbian  | 1500 | 15.82 | 1648.57 | 86.34 | 990.16  | 0.60 | Epiphyte | Dense forest | Non-endemic |
| <i>Pholidota missionariorum</i> | Malipo    | 1700 | 14.06 | 1063.54 | 85.83 | 1053.97 | 0.99 | Epiphyte | Shrubland    | Non-endemic |
| <i>Pholidota missionariorum</i> | Hekou     | 2000 | 11.75 | 1768.58 | 84.25 | 1166.26 | 0.66 | Epiphyte | Dense forest | Non-endemic |
| <i>Pholidota protracta</i>      | Gongshan  | 1800 | 13.28 | 1738.42 | 78.47 | 860.43  | 0.50 | Epiphyte | Dense forest | Non-endemic |
| <i>Pholidota protracta</i>      | Gongshan  | 2380 | 9.80  | 1738.42 | 78.47 | 860.43  | 0.50 | Epiphyte | Dense forest | Non-endemic |
| <i>Pholidota protracta</i>      | Lijiang   | 2500 | 12.07 | 982.53  | 63.24 | 1077.65 | 1.10 | Epiphyte | Dense forest | Non-endemic |
| <i>Pholidota protracta</i>      | Gongshan  | 2700 | 7.88  | 1738.42 | 78.47 | 860.43  | 0.50 | Epiphyte | Dense forest | Non-endemic |
| <i>Pholidota rupestris</i>      | Gongshan  | 1700 | 13.88 | 1738.42 | 78.47 | 860.43  | 0.50 | Epiphyte | Dense forest | Non-endemic |
| <i>Pholidota rupestris</i>      | Gongshan  | 1860 | 12.92 | 1738.42 | 78.47 | 860.43  | 0.50 | Epiphyte | Shrubland    | Non-endemic |
| <i>Pholidota rupestris</i>      | Gongshan  | 2000 | 12.08 | 1738.42 | 78.47 | 860.43  | 0.50 | Epiphyte | Dense forest | Non-endemic |
| <i>Pholidota rupestris</i>      | Gongshan  | 2000 | 12.08 | 1738.42 | 78.47 | 860.43  | 0.50 | Epiphyte | Dense forest | Non-endemic |
| <i>Pholidota rupestris</i>      | Lijiang   | 2000 | 15.07 | 982.53  | 63.24 | 1077.65 | 1.10 | Epiphyte | Forest edge  | Non-endemic |
| <i>Pholidota rupestris</i>      | Deqin     | 2000 | 13.17 | 639.48  | 70.85 | 896.66  | 1.40 | Epiphyte | Open site    | Non-endemic |
| <i>Pholidota rupestris</i>      | Zhongdian | 2000 | 13.44 | 641.73  | 69.05 | 914.89  | 1.43 | Epiphyte | Shrubland    | Non-endemic |
| <i>Pholidota rupestris</i>      | Zhongdian | 2200 | 12.24 | 641.73  | 69.05 | 914.89  | 1.43 | Epiphyte | Dense forest | Non-endemic |
| <i>Pholidota rupestris</i>      | Weixi     | 2300 | 11.63 | 970.70  | 69.95 | 1021.03 | 1.05 | Epiphyte | Dense forest | Non-endemic |
| <i>Pholidota rupestris</i>      | Gongshan  | 2300 | 10.28 | 1738.42 | 78.47 | 860.43  | 0.50 | Epiphyte | Dense forest | Non-endemic |
| <i>Pholidota rupestris</i>      | Gongshan  | 2300 | 10.28 | 1738.42 | 78.47 | 860.43  | 0.50 | Epiphyte | Dense forest | Non-endemic |
| <i>Pholidota rupestris</i>      | Lijiang   | 2340 | 13.03 | 982.53  | 63.24 | 1077.65 | 1.10 | Epiphyte | Forest edge  | Non-endemic |
| <i>Pholidota rupestris</i>      | Gongshan  | 2500 | 9.08  | 1738.42 | 78.47 | 860.43  | 0.50 | Epiphyte | Dense forest | Non-endemic |
| <i>Pholidota rupestris</i>      | Gongshan  | 2600 | 8.48  | 1738.42 | 78.47 | 860.43  | 0.50 | Epiphyte | Dense forest | Non-endemic |

|                                |            |      |       |         |       |         |      |             |               |             |
|--------------------------------|------------|------|-------|---------|-------|---------|------|-------------|---------------|-------------|
| <i>Pholidota wenshanica</i>    | Wenshan    | 1400 | 17.26 | 988.87  | 76.70 | 1272.98 | 1.29 | Epiphyte    | Sparse forest | Endemic     |
| <i>Pholidota wenshanica</i>    | Malipo     | 1500 | 15.26 | 1063.54 | 85.83 | 1053.97 | 0.99 | Epiphyte    | Forest edge   | Endemic     |
| <i>Pholidota yunnanensis</i>   | Suijiang   | 850  | 15.23 | 917.85  | 78.74 | 923.40  | 1.01 | Epiphyte    | Open site     | Non-endemic |
| <i>Pholidota yunnanensis</i>   | Yanshan    | 1200 | 18.26 | 1003.57 | 79.42 | 1172.21 | 1.17 | Epiphyte    | Dense forest  | Non-endemic |
| <i>Pholidota yunnanensis</i>   | Yanshan    | 1200 | 18.26 | 1003.57 | 79.42 | 1172.21 | 1.17 | Epiphyte    | Dense forest  | Non-endemic |
| <i>Pholidota yunnanensis</i>   | Yanshan    | 1300 | 17.66 | 1003.57 | 79.42 | 1172.21 | 1.17 | Epiphyte    | Dense forest  | Non-endemic |
| <i>Pholidota yunnanensis</i>   | Funing     | 1300 | 15.82 | 1161.58 | 79.07 | 1147.17 | 0.99 | Epiphyte    | Sparse forest | Non-endemic |
| <i>Pholidota yunnanensis</i>   | Pingbian   | 1380 | 16.54 | 1648.57 | 86.34 | 990.16  | 0.60 | Epiphyte    | Sparse forest | Non-endemic |
| <i>Pholidota yunnanensis</i>   | Pingbian   | 1400 | 16.42 | 1648.57 | 86.34 | 990.16  | 0.60 | Epiphyte    | Dense forest  | Non-endemic |
| <i>Pholidota yunnanensis</i>   | Xichou     | 1400 | 16.53 | 1267.54 | 82.98 | 985.97  | 0.78 | Epiphyte    | Shrubland     | Non-endemic |
| <i>Pholidota yunnanensis</i>   | Xichou     | 1450 | 16.23 | 1267.54 | 82.98 | 985.97  | 0.78 | Epiphyte    | Open site     | Non-endemic |
| <i>Pholidota yunnanensis</i>   | Xichou     | 1500 | 15.93 | 1267.54 | 82.98 | 985.97  | 0.78 | Epiphyte    | Dense forest  | Non-endemic |
| <i>Pholidota yunnanensis</i>   | Jiangchuan | 1640 | 16.16 | 872.74  | 74.72 | 1181.99 | 1.35 | Epiphyte    | Dense forest  | Non-endemic |
| <i>Pholidota yunnanensis</i>   | Xichou     | 1650 | 15.03 | 1267.54 | 82.98 | 985.97  | 0.78 | Epiphyte    | Dense forest  | Non-endemic |
| <i>Pholidota yunnanensis</i>   | Mengzi     | 1700 | 16.26 | 855.35  | 71.82 | 1434.56 | 1.68 | Epiphyte    | Shrubland     | Non-endemic |
| <i>Pholidota yunnanensis</i>   | Luxi       | 1750 | 14.58 | 1650.33 | 79.33 | 1183.39 | 0.72 | Epiphyte    | Dense forest  | Non-endemic |
| <i>Pholidota yunnanensis</i>   | Yongde     | 2000 | 15.13 | 1266.25 | 69.00 | 1283.63 | 1.01 | Epiphyte    | Dense forest  | Non-endemic |
| <i>Phreatia formosana</i>      | Jinghong   | 1800 | 14.92 | 1161.08 | 80.46 | 1256.19 | 1.08 | Epiphyte    | Dense forest  | Non-endemic |
| <i>Platanthera bakeriana</i>   | Fugong     | 1590 | 14.52 | 1441.43 | 79.99 | 906.18  | 0.63 | Terrestrial | Forest edge   | Non-endemic |
| <i>Platanthera bakeriana</i>   | Baoshan    | 1780 | 15.08 | 992.38  | 73.87 | 1160.15 | 1.17 | Terrestrial | Forest edge   | Non-endemic |
| <i>Platanthera bakeriana</i>   | Heqing     | 2350 | 12.69 | 977.00  | 65.16 | 1211.84 | 1.24 | Terrestrial | Meadow        | Non-endemic |
| <i>Platanthera bakeriana</i>   | Lijiang    | 2670 | 11.05 | 982.53  | 63.24 | 1077.65 | 1.10 | Terrestrial | Meadow        | Non-endemic |
| <i>Platanthera bakeriana</i>   | Gongshan   | 2700 | 7.88  | 1738.42 | 78.47 | 860.43  | 0.50 | Terrestrial | Grassy slope  | Non-endemic |
| <i>Platanthera bakeriana</i>   | Dongchuan  | 2900 | 8.43  | 1021.73 | 71.65 | 1186.61 | 1.16 | Terrestrial | Meadow        | Non-endemic |
| <i>Platanthera bakeriana</i>   | Lijiang    | 3000 | 9.07  | 982.53  | 63.24 | 1077.65 | 1.10 | Terrestrial | Meadow        | Non-endemic |
| <i>Platanthera bakeriana</i>   | Fugong     | 3400 | 3.66  | 1441.43 | 79.99 | 906.18  | 0.63 | Terrestrial | Dense forest  | Non-endemic |
| <i>Platanthera bakeriana</i>   | Deqin      | 3600 | 3.57  | 639.48  | 70.85 | 896.66  | 1.40 | Terrestrial | Dense forest  | Non-endemic |
| <i>Platanthera bakeriana</i>   | Dali       | 3600 | 5.22  | 1082.70 | 68.61 | 1256.27 | 1.16 | Terrestrial | Meadow        | Non-endemic |
| <i>Platanthera bakeriana</i>   | Luquan     | 3660 | 3.76  | 965.09  | 73.60 | 1160.89 | 1.20 | Terrestrial | Meadow        | Non-endemic |
| <i>Platanthera bakeriana</i>   | Zhongdian  | 3800 | 2.64  | 641.73  | 69.05 | 914.89  | 1.43 | Terrestrial | Grassy slope  | Non-endemic |
| <i>Platanthera bakeriana</i>   | Heqing     | 3800 | 3.99  | 977.00  | 65.16 | 1211.84 | 1.24 | Terrestrial | Grassy slope  | Non-endemic |
| <i>Platanthera bakeriana</i>   | Zhongdian  | 3950 | 1.74  | 641.73  | 69.05 | 914.89  | 1.43 | Terrestrial | Meadow        | Non-endemic |
| <i>Platanthera chiloglossa</i> | Gongshan   | 1750 | 13.58 | 1738.42 | 78.47 | 860.43  | 0.50 | Terrestrial | Forest edge   | Non-endemic |
| <i>Platanthera chiloglossa</i> | Dongchuan  | 2900 | 8.43  | 1021.73 | 71.65 | 1186.61 | 1.16 | Terrestrial | Meadow        | Non-endemic |
| <i>Platanthera chiloglossa</i> | Deqin      | 3000 | 7.17  | 639.48  | 70.85 | 896.66  | 1.40 | Terrestrial | Dense forest  | Non-endemic |
| <i>Platanthera chiloglossa</i> | Luquan     | 3190 | 6.58  | 965.09  | 73.60 | 1160.89 | 1.20 | Terrestrial | Grassy slope  | Non-endemic |



|                                     |           |      |       |         |       |         |      |             |              |             |
|-------------------------------------|-----------|------|-------|---------|-------|---------|------|-------------|--------------|-------------|
| <i>Platanthera chiloglossa</i>      | Fugong    | 3200 | 4.86  | 1441.43 | 79.99 | 906.18  | 0.63 | Terrestrial | Grassy slope | Non-endemic |
| <i>Platanthera chiloglossa</i>      | Luquan    | 3900 | 2.32  | 965.09  | 73.60 | 1160.89 | 1.20 | Terrestrial | Meadow       | Non-endemic |
| <i>Platanthera chlorantha</i>       | Weixi     | 1820 | 14.51 | 970.70  | 69.95 | 1021.03 | 1.05 | Terrestrial | Dense forest | Non-endemic |
| <i>Platanthera chlorantha</i>       | Deqin     | 3100 | 6.57  | 639.48  | 70.85 | 896.66  | 1.40 | Terrestrial | Grassy slope | Non-endemic |
| <i>Platanthera chlorantha</i>       | Zhongdian | 3100 | 6.84  | 641.73  | 69.05 | 914.89  | 1.43 | Terrestrial | Shrubland    | Non-endemic |
| <i>Platanthera chlorantha</i>       | Zhongdian | 3100 | 6.84  | 641.73  | 69.05 | 914.89  | 1.43 | Terrestrial | Shrubland    | Non-endemic |
| <i>Platanthera chlorantha</i>       | Zhongdian | 3300 | 5.64  | 641.73  | 69.05 | 914.89  | 1.43 | Terrestrial | Dense forest | Non-endemic |
| <i>Platanthera chlorantha</i>       | Zhongdian | 3450 | 4.74  | 641.73  | 69.05 | 914.89  | 1.43 | Terrestrial | Grassy slope | Non-endemic |
| <i>Platanthera clavigera</i>        | Zhongdian | 3100 | 6.84  | 641.73  | 69.05 | 914.89  | 1.43 | Terrestrial | Meadow       | Non-endemic |
| <i>Platanthera exelliana</i>        | Deqin     | 2900 | 7.77  | 639.48  | 70.85 | 896.66  | 1.40 | Terrestrial | Grassy slope | Non-endemic |
| <i>Platanthera exelliana</i>        | Deqin     | 3300 | 5.37  | 639.48  | 70.85 | 896.66  | 1.40 | Terrestrial | Grassy slope | Non-endemic |
| <i>Platanthera exelliana</i>        | Gongshan  | 3800 | 1.28  | 1738.42 | 78.47 | 860.43  | 0.50 | Terrestrial | Meadow       | Non-endemic |
| <i>Platanthera finetiana</i>        | Lushui    | 2200 | 12.85 | 1195.57 | 70.63 | 911.65  | 0.76 | Terrestrial | Forest edge  | Non-endemic |
| <i>Platanthera handel-mazzettii</i> | Gongshan  | 3111 | 5.41  | 1738.42 | 78.47 | 860.43  | 0.50 | Terrestrial | Dense forest | Endemic     |
| <i>Platanthera handel-mazzettii</i> | Gongshan  | 3354 | 3.96  | 1738.42 | 78.47 | 860.43  | 0.50 | Terrestrial | Dense forest | Endemic     |
| <i>Platanthera herminoides</i>      | Gongshan  | 3020 | 5.96  | 1738.42 | 78.47 | 860.43  | 0.50 | Terrestrial | Grassy slope | Endemic     |
| <i>Platanthera herminoides</i>      | Gongshan  | 3800 | 1.28  | 1738.42 | 78.47 | 860.43  | 0.50 | Terrestrial | Meadow       | Endemic     |
| <i>Platanthera japonica</i>         | Lushui    | 1840 | 15.01 | 1195.57 | 70.63 | 911.65  | 0.76 | Terrestrial | Grassy slope | Non-endemic |
| <i>Platanthera japonica</i>         | Dali      | 2600 | 11.22 | 1082.70 | 68.61 | 1256.27 | 1.16 | Terrestrial | Grassy slope | Non-endemic |
| <i>Platanthera japonica</i>         | Yongde    | 2810 | 10.27 | 1266.25 | 69.00 | 1283.63 | 1.01 | Terrestrial | Forest edge  | Non-endemic |
| <i>Platanthera japonica</i>         | Dali      | 2900 | 9.42  | 1082.70 | 68.61 | 1256.27 | 1.16 | Terrestrial | Shrubland    | Non-endemic |
| <i>Platanthera latilabris</i>       | Tengchong | 1630 | 15.22 | 1501.45 | 78.06 | 857.93  | 0.57 | Terrestrial | Grassy slope | Non-endemic |
| <i>Platanthera latilabris</i>       | Jingdong  | 1950 | 13.88 | 1128.40 | 76.80 | 1142.11 | 1.01 | Terrestrial | Grassy slope | Non-endemic |
| <i>Platanthera latilabris</i>       | Heqing    | 1980 | 14.91 | 977.00  | 65.16 | 1211.84 | 1.24 | Terrestrial | Dense forest | Non-endemic |
| <i>Platanthera latilabris</i>       | Kunming   | 2000 | 14.28 | 1019.14 | 72.30 | 1197.62 | 1.18 | Terrestrial | Dense forest | Non-endemic |
| <i>Platanthera latilabris</i>       | Kunming   | 2250 | 12.78 | 1019.14 | 72.30 | 1197.62 | 1.18 | Terrestrial | Grassy slope | Non-endemic |
| <i>Platanthera latilabris</i>       | Longling  | 2400 | 9.72  | 2098.66 | 84.65 | 973.45  | 0.46 | Terrestrial | Forest edge  | Non-endemic |
| <i>Platanthera latilabris</i>       | Heqing    | 2500 | 11.79 | 977.00  | 65.16 | 1211.84 | 1.24 | Terrestrial | Grassy slope | Non-endemic |
| <i>Platanthera latilabris</i>       | Dongchuan | 2850 | 8.73  | 1021.73 | 71.65 | 1186.61 | 1.16 | Terrestrial | Forest edge  | Non-endemic |
| <i>Platanthera latilabris</i>       | Dongchuan | 2900 | 8.43  | 1021.73 | 71.65 | 1186.61 | 1.16 | Terrestrial | Grassy slope | Non-endemic |
| <i>Platanthera leptocaulon</i>      | Gongshan  | 2900 | 6.68  | 1738.42 | 78.47 | 860.43  | 0.50 | Terrestrial | Forest edge  | Non-endemic |
| <i>Platanthera leptocaulon</i>      | Gongshan  | 3000 | 6.08  | 1738.42 | 78.47 | 860.43  | 0.50 | Terrestrial | Grassy slope | Non-endemic |
| <i>Platanthera leptocaulon</i>      | Fugong    | 4000 | 0.06  | 1441.43 | 79.99 | 906.18  | 0.63 | Terrestrial | Forest edge  | Non-endemic |
| <i>Platanthera likiangensis</i>     | Lijiang   | 2800 | 10.27 | 982.53  | 63.24 | 1077.65 | 1.10 | Terrestrial | Dense forest | Endemic     |
| <i>Platanthera likiangensis</i>     | Weixi     | 2900 | 8.03  | 970.70  | 69.95 | 1021.03 | 1.05 | Terrestrial | Dense forest | Endemic     |
| <i>Platanthera minor</i>            | Wuding    | 2400 | 10.99 | 988.68  | 74.74 | 1188.19 | 1.20 | Terrestrial | Dense forest | Non-endemic |

|                                    |           |      |       |         |       |         |      |             |               |             |
|------------------------------------|-----------|------|-------|---------|-------|---------|------|-------------|---------------|-------------|
| <i>Platanthera minutiflora</i>     | Yongde    | 2700 | 10.93 | 1266.25 | 69.00 | 1283.63 | 1.01 | Terrestrial | Grassy slope  | Non-endemic |
| <i>Platanthera minutiflora</i>     | Lijiang   | 3200 | 7.87  | 982.53  | 63.24 | 1077.65 | 1.10 | Terrestrial | Dense forest  | Non-endemic |
| <i>Platanthera minutiflora</i>     | Deqin     | 3540 | 3.93  | 639.48  | 70.85 | 896.66  | 1.40 | Terrestrial | Forest edge   | Non-endemic |
| <i>Platanthera minutiflora</i>     | Zhongdian | 4000 | 1.44  | 641.73  | 69.05 | 914.89  | 1.43 | Terrestrial | Meadow        | Non-endemic |
| <i>Platanthera oreophila</i>       | Zhongdian | 2800 | 8.64  | 641.73  | 69.05 | 914.89  | 1.43 | Terrestrial | Dense forest  | Non-endemic |
| <i>Platanthera oreophila</i>       | Zhongdian | 3500 | 4.44  | 641.73  | 69.05 | 914.89  | 1.43 | Terrestrial | Dense forest  | Non-endemic |
| <i>Platanthera oreophila</i>       | Zhongdian | 3600 | 3.84  | 641.73  | 69.05 | 914.89  | 1.43 | Terrestrial | Grassy slope  | Non-endemic |
| <i>Platanthera oreophila</i>       | Zhongdian | 3800 | 2.64  | 641.73  | 69.05 | 914.89  | 1.43 | Terrestrial | Grassy slope  | Non-endemic |
| <i>Platanthera oreophila</i>       | Zhongdian | 3800 | 2.64  | 641.73  | 69.05 | 914.89  | 1.43 | Terrestrial | Shrubland     | Non-endemic |
| <i>Platanthera platantheroides</i> | Menglian  | 2450 | 10.88 | 1357.68 | 80.47 | 1185.94 | 0.87 | Terrestrial | Shrubland     | Non-endemic |
| <i>Platanthera roseotincta</i>     | Gongshan  | 3400 | 3.68  | 1738.42 | 78.47 | 860.43  | 0.50 | Terrestrial | Meadow        | Non-endemic |
| <i>Platanthera roseotincta</i>     | Deqin     | 3400 | 4.77  | 639.48  | 70.85 | 896.66  | 1.40 | Terrestrial | Shrubland     | Non-endemic |
| <i>Platanthera roseotincta</i>     | Fugong    | 3500 | 3.06  | 1441.43 | 79.99 | 906.18  | 0.63 | Terrestrial | Meadow        | Non-endemic |
| <i>Platanthera roseotincta</i>     | Gongshan  | 3600 | 2.48  | 1738.42 | 78.47 | 860.43  | 0.50 | Terrestrial | Grassy slope  | Non-endemic |
| <i>Platanthera roseotincta</i>     | Gongshan  | 3600 | 2.48  | 1738.42 | 78.47 | 860.43  | 0.50 | Terrestrial | Sparse forest | Non-endemic |
| <i>Platanthera roseotincta</i>     | Gongshan  | 3880 | 0.80  | 1738.42 | 78.47 | 860.43  | 0.50 | Terrestrial | Meadow        | Non-endemic |
| <i>Platanthera sikkimensis</i>     | Gongshan  | 2300 | 10.28 | 1738.42 | 78.47 | 860.43  | 0.50 | Terrestrial | Dense forest  | Non-endemic |
| <i>Platanthera sikkimensis</i>     | Gongshan  | 2662 | 8.11  | 1738.42 | 78.47 | 860.43  | 0.50 | Terrestrial | Dense forest  | Non-endemic |
| <i>Platanthera sinica</i>          | Eryuan    | 2280 | 12.85 | 745.16  | 68.27 | 1210.94 | 1.63 | Terrestrial | Grassy slope  | Endemic     |
| <i>Platanthera sinica</i>          | Lijiang   | 2800 | 10.27 | 982.53  | 63.24 | 1077.65 | 1.10 | Terrestrial | Grassy slope  | Endemic     |
| <i>Platanthera sinica</i>          | Zhongdian | 2900 | 8.04  | 641.73  | 69.05 | 914.89  | 1.43 | Terrestrial | Grassy slope  | Endemic     |
| <i>Platanthera sinica</i>          | Gongshan  | 3200 | 4.88  | 1738.42 | 78.47 | 860.43  | 0.50 | Terrestrial | Dense forest  | Endemic     |
| <i>Platanthera stenantha</i>       | Qiaojia   | 2300 | 9.82  | 878.15  | 76.01 | 1034.97 | 1.18 | Terrestrial | Grassy slope  | Non-endemic |
| <i>Platanthera stenantha</i>       | Gongshan  | 3500 | 3.08  | 1738.42 | 78.47 | 860.43  | 0.50 | Terrestrial | Dense forest  | Non-endemic |
| <i>Platanthera stenophylla</i>     | Gongshan  | 2500 | 9.08  | 1738.42 | 78.47 | 860.43  | 0.50 | Terrestrial | Grassy slope  | Non-endemic |
| <i>Pleione alba</i>                | Jingdong  | 3000 | 7.58  | 1128.40 | 76.80 | 1142.11 | 1.01 | Epiphyte    | Open site     | Endemic     |
| <i>Pleione bulbocodioides</i>      | Menglian  | 980  | 19.70 | 1357.68 | 80.47 | 1185.94 | 0.87 | Epiphyte    | Shrubland     | Non-endemic |
| <i>Pleione bulbocodioides</i>      | Yongshan  | 1800 | 10.90 | 665.40  | 74.22 | 968.77  | 1.46 | Epiphyte    | Shrubland     | Non-endemic |
| <i>Pleione bulbocodioides</i>      | Daguan    | 1850 | 10.72 | 987.00  | 80.05 | 896.37  | 0.91 | Epiphyte    | Dense forest  | Non-endemic |
| <i>Pleione bulbocodioides</i>      | Dali      | 1910 | 15.36 | 1082.70 | 68.61 | 1256.27 | 1.16 | Epiphyte    | Shrubland     | Non-endemic |
| <i>Pleione bulbocodioides</i>      | Dali      | 1940 | 15.18 | 1082.70 | 68.61 | 1256.27 | 1.16 | Epiphyte    | Shrubland     | Non-endemic |
| <i>Pleione bulbocodioides</i>      | Zhenxiong | 1950 | 9.74  | 899.34  | 83.70 | 852.28  | 0.95 | Epiphyte    | Shrubland     | Non-endemic |
| <i>Pleione bulbocodioides</i>      | Qiaojia   | 2100 | 11.02 | 878.15  | 76.01 | 1034.97 | 1.18 | Epiphyte    | Open site     | Non-endemic |
| <i>Pleione bulbocodioides</i>      | Songming  | 2150 | 12.69 | 1010.18 | 74.14 | 1134.24 | 1.12 | Epiphyte    | Sparse forest | Non-endemic |
| <i>Pleione bulbocodioides</i>      | Yongde    | 2200 | 13.93 | 1266.25 | 69.00 | 1283.63 | 1.01 | Epiphyte    | Open site     | Non-endemic |
| <i>Pleione bulbocodioides</i>      | Lijiang   | 2200 | 13.87 | 982.53  | 63.24 | 1077.65 | 1.10 | Epiphyte    | Shrubland     | Non-endemic |

|                               |           |      |       |         |       |         |      |          |               |             |
|-------------------------------|-----------|------|-------|---------|-------|---------|------|----------|---------------|-------------|
| <i>Pleione bulbocodioides</i> | Fuming    | 2200 | 12.77 | 871.62  | 71.93 | 1209.56 | 1.39 | Epiphyte | Shrubland     | Non-endemic |
| <i>Pleione bulbocodioides</i> | Songming  | 2210 | 12.33 | 1010.18 | 74.14 | 1134.24 | 1.12 | Epiphyte | Sparse forest | Non-endemic |
| <i>Pleione bulbocodioides</i> | Jianchuan | 2230 | 12.17 | 753.13  | 70.16 | 1154.48 | 1.53 | Epiphyte | Dense forest  | Non-endemic |
| <i>Pleione bulbocodioides</i> | Luquan    | 2300 | 11.92 | 965.09  | 73.60 | 1160.89 | 1.20 | Epiphyte | Sparse forest | Non-endemic |
| <i>Pleione bulbocodioides</i> | Lijiang   | 2380 | 12.79 | 982.53  | 63.24 | 1077.65 | 1.10 | Epiphyte | Open site     | Non-endemic |
| <i>Pleione bulbocodioides</i> | Lijiang   | 2400 | 12.67 | 982.53  | 63.24 | 1077.65 | 1.10 | Epiphyte | Dense forest  | Non-endemic |
| <i>Pleione bulbocodioides</i> | Wenshan   | 2400 | 11.26 | 988.87  | 76.70 | 1272.98 | 1.29 | Epiphyte | Grassy slope  | Non-endemic |
| <i>Pleione bulbocodioides</i> | Jianchuan | 2450 | 10.85 | 753.13  | 70.16 | 1154.48 | 1.53 | Epiphyte | Shrubland     | Non-endemic |
| <i>Pleione bulbocodioides</i> | Lijiang   | 2500 | 12.07 | 982.53  | 63.24 | 1077.65 | 1.10 | Epiphyte | Dense forest  | Non-endemic |
| <i>Pleione bulbocodioides</i> | Zhongdian | 2500 | 10.44 | 641.73  | 69.05 | 914.89  | 1.43 | Epiphyte | Forest edge   | Non-endemic |
| <i>Pleione bulbocodioides</i> | Yongde    | 2550 | 11.83 | 1266.25 | 69.00 | 1283.63 | 1.01 | Epiphyte | Dense forest  | Non-endemic |
| <i>Pleione bulbocodioides</i> | Weixi     | 2560 | 10.07 | 970.70  | 69.95 | 1021.03 | 1.05 | Epiphyte | Dense forest  | Non-endemic |
| <i>Pleione bulbocodioides</i> | Zhongdian | 2600 | 9.84  | 641.73  | 69.05 | 914.89  | 1.43 | Epiphyte | Dense forest  | Non-endemic |
| <i>Pleione bulbocodioides</i> | Dali      | 2600 | 11.22 | 1082.70 | 68.61 | 1256.27 | 1.16 | Epiphyte | Open site     | Non-endemic |
| <i>Pleione bulbocodioides</i> | Jingdong  | 2600 | 9.98  | 1128.40 | 76.80 | 1142.11 | 1.01 | Epiphyte | Shrubland     | Non-endemic |
| <i>Pleione bulbocodioides</i> | Qiaojia   | 2750 | 7.12  | 878.15  | 76.01 | 1034.97 | 1.18 | Epiphyte | Open site     | Non-endemic |
| <i>Pleione bulbocodioides</i> | Lijiang   | 2750 | 10.57 | 982.53  | 63.24 | 1077.65 | 1.10 | Epiphyte | Shrubland     | Non-endemic |
| <i>Pleione bulbocodioides</i> | Lijiang   | 2760 | 10.51 | 982.53  | 63.24 | 1077.65 | 1.10 | Epiphyte | Dense forest  | Non-endemic |
| <i>Pleione bulbocodioides</i> | Dayao     | 2800 | 10.13 | 810.80  | 65.01 | 1427.38 | 1.76 | Epiphyte | Dense forest  | Non-endemic |
| <i>Pleione bulbocodioides</i> | Ninglang  | 2800 | 9.26  | 928.64  | 69.17 | 1136.01 | 1.22 | Epiphyte | Shrubland     | Non-endemic |
| <i>Pleione bulbocodioides</i> | Dali      | 2800 | 10.02 | 1082.70 | 68.61 | 1256.27 | 1.16 | Epiphyte | Shrubland     | Non-endemic |
| <i>Pleione bulbocodioides</i> | Dayao     | 2850 | 9.83  | 810.80  | 65.01 | 1427.38 | 1.76 | Epiphyte | Dense forest  | Non-endemic |
| <i>Pleione bulbocodioides</i> | Lijiang   | 2850 | 9.97  | 982.53  | 63.24 | 1077.65 | 1.10 | Epiphyte | Forest edge   | Non-endemic |
| <i>Pleione bulbocodioides</i> | Deqin     | 2900 | 7.77  | 639.48  | 70.85 | 896.66  | 1.40 | Epiphyte | Dense forest  | Non-endemic |
| <i>Pleione bulbocodioides</i> | Lijiang   | 2910 | 9.61  | 982.53  | 63.24 | 1077.65 | 1.10 | Epiphyte | Shrubland     | Non-endemic |
| <i>Pleione bulbocodioides</i> | Luquan    | 2950 | 8.02  | 965.09  | 73.60 | 1160.89 | 1.20 | Epiphyte | Shrubland     | Non-endemic |
| <i>Pleione bulbocodioides</i> | Lijiang   | 3100 | 8.47  | 982.53  | 63.24 | 1077.65 | 1.10 | Epiphyte | Grassy slope  | Non-endemic |
| <i>Pleione bulbocodioides</i> | Yangbi    | 3100 | 7.39  | 1044.23 | 72.19 | 1161.15 | 1.11 | Epiphyte | Open site     | Non-endemic |
| <i>Pleione bulbocodioides</i> | Luquan    | 3150 | 6.82  | 965.09  | 73.60 | 1160.89 | 1.20 | Epiphyte | Dense forest  | Non-endemic |
| <i>Pleione bulbocodioides</i> | Zhongdian | 3300 | 5.64  | 641.73  | 69.05 | 914.89  | 1.43 | Epiphyte | Meadow        | Non-endemic |
| <i>Pleione bulbocodioides</i> | Lijiang   | 3300 | 7.27  | 982.53  | 63.24 | 1077.65 | 1.10 | Epiphyte | Shrubland     | Non-endemic |
| <i>Pleione bulbocodioides</i> | Lijiang   | 3370 | 6.85  | 982.53  | 63.24 | 1077.65 | 1.10 | Epiphyte | Meadow        | Non-endemic |
| <i>Pleione bulbocodioides</i> | Weixi     | 3400 | 5.03  | 970.70  | 69.95 | 1021.03 | 1.05 | Epiphyte | Dense forest  | Non-endemic |
| <i>Pleione chunii</i>         | Yongde    | 2500 | 12.13 | 1266.25 | 69.00 | 1283.63 | 1.01 | Epiphyte | Forest edge   | Endemic     |
| <i>Pleione chunii</i>         | Yongde    | 2630 | 11.35 | 1266.25 | 69.00 | 1283.63 | 1.01 | Epiphyte | Dense forest  | Endemic     |
| <i>Pleione forrestii</i>      | Yangbi    | 1950 | 14.29 | 1044.23 | 72.19 | 1161.15 | 1.11 | Epiphyte | Dense forest  | Endemic     |

|                            |           |      |       |         |       |         |      |          |               |             |
|----------------------------|-----------|------|-------|---------|-------|---------|------|----------|---------------|-------------|
| <i>Pleione forrestii</i>   | Yunlong   | 3000 | 8.05  | 1195.57 | 70.63 | 911.65  | 0.76 | Epiphyte | Dense forest  | Endemic     |
| <i>Pleione forrestii</i>   | Yangbi    | 3100 | 7.39  | 1044.23 | 72.19 | 1161.15 | 1.11 | Epiphyte | Open site     | Endemic     |
| <i>Pleione forrestii</i>   | Fugong    | 3200 | 4.86  | 1441.43 | 79.99 | 906.18  | 0.63 | Epiphyte | Dense forest  | Endemic     |
| <i>Pleione forrestii</i>   | Fugong    | 3200 | 4.86  | 1441.43 | 79.99 | 906.18  | 0.63 | Epiphyte | Dense forest  | Endemic     |
| <i>Pleione grandiflora</i> | Jingdong  | 2370 | 11.36 | 1128.40 | 76.80 | 1142.11 | 1.01 | Epiphyte | Dense forest  | Endemic     |
| <i>Pleione grandiflora</i> | Lincang   | 2500 | 11.52 | 1165.84 | 72.08 | 1167.73 | 1.00 | Epiphyte | Dense forest  | Endemic     |
| <i>Pleione grandiflora</i> | Jingdong  | 2500 | 10.58 | 1128.40 | 76.80 | 1142.11 | 1.01 | Epiphyte | Shrubland     | Endemic     |
| <i>Pleione hookeriana</i>  | Yongde    | 2750 | 10.63 | 1266.25 | 69.00 | 1283.63 | 1.01 | Epiphyte | Dense forest  | Non-endemic |
| <i>Pleione hookeriana</i>  | Jinping   | 2100 | 12.89 | 2305.17 | 83.81 | 1030.46 | 0.45 | Epiphyte | Forest edge   | Non-endemic |
| <i>Pleione hookeriana</i>  | Yongde    | 2500 | 12.13 | 1266.25 | 69.00 | 1283.63 | 1.01 | Epiphyte | Dense forest  | Non-endemic |
| <i>Pleione praecox</i>     | Pingbian  | 1820 | 13.90 | 1648.57 | 86.34 | 990.16  | 0.60 | Epiphyte | Dense forest  | Non-endemic |
| <i>Pleione praecox</i>     | Pingbian  | 1940 | 13.18 | 1648.57 | 86.34 | 990.16  | 0.60 | Epiphyte | Dense forest  | Non-endemic |
| <i>Pleione praecox</i>     | Gengma    | 2100 | 15.47 | 1327.70 | 77.28 | 1181.78 | 0.89 | Epiphyte | Dense forest  | Non-endemic |
| <i>Pleione saxicola</i>    | Gongshan  | 2400 | 9.68  | 1738.42 | 78.47 | 860.43  | 0.50 | Epiphyte | Dense forest  | Endemic     |
| <i>Pleione saxicola</i>    | Gongshan  | 2500 | 9.08  | 1738.42 | 78.47 | 860.43  | 0.50 | Epiphyte | Open site     | Endemic     |
| <i>Pleione scopulorum</i>  | Gongshan  | 2900 | 6.68  | 1738.42 | 78.47 | 860.43  | 0.50 | Epiphyte | Dense forest  | Non-endemic |
| <i>Pleione scopulorum</i>  | Gongshan  | 2900 | 6.68  | 1738.42 | 78.47 | 860.43  | 0.50 | Epiphyte | Dense forest  | Non-endemic |
| <i>Pleione scopulorum</i>  | Gongshan  | 3000 | 6.08  | 1738.42 | 78.47 | 860.43  | 0.50 | Epiphyte | Meadow        | Non-endemic |
| <i>Pleione scopulorum</i>  | Fugong    | 3400 | 3.66  | 1441.43 | 79.99 | 906.18  | 0.63 | Epiphyte | Dense forest  | Non-endemic |
| <i>Pleione scopulorum</i>  | Deqin     | 3400 | 4.77  | 639.48  | 70.85 | 896.66  | 1.40 | Epiphyte | Shrubland     | Non-endemic |
| <i>Pleione scopulorum</i>  | Deqin     | 3500 | 4.17  | 639.48  | 70.85 | 896.66  | 1.40 | Epiphyte | Shrubland     | Non-endemic |
| <i>Pleione scopulorum</i>  | Gongshan  | 3600 | 2.48  | 1738.42 | 78.47 | 860.43  | 0.50 | Epiphyte | Dense forest  | Non-endemic |
| <i>Pleione scopulorum</i>  | Gongshan  | 3600 | 2.48  | 1738.42 | 78.47 | 860.43  | 0.50 | Epiphyte | Grassy slope  | Non-endemic |
| <i>Pleione scopulorum</i>  | Gongshan  | 3600 | 2.48  | 1738.42 | 78.47 | 860.43  | 0.50 | Epiphyte | Grassy slope  | Non-endemic |
| <i>Pleione scopulorum</i>  | Gongshan  | 3700 | 1.88  | 1738.42 | 78.47 | 860.43  | 0.50 | Epiphyte | Shrubland     | Non-endemic |
| <i>Pleione scopulorum</i>  | Gongshan  | 3900 | 0.68  | 1738.42 | 78.47 | 860.43  | 0.50 | Epiphyte | Shrubland     | Non-endemic |
| <i>Pleione yunnanensis</i> | Guangnan  | 1550 | 14.95 | 1044.26 | 78.94 | 1090.35 | 1.04 | Epiphyte | Grassy slope  | Non-endemic |
| <i>Pleione yunnanensis</i> | Weixi     | 1750 | 14.93 | 970.70  | 69.95 | 1021.03 | 1.05 | Epiphyte | Dense forest  | Non-endemic |
| <i>Pleione yunnanensis</i> | Yangbi    | 1820 | 15.07 | 1044.23 | 72.19 | 1161.15 | 1.11 | Epiphyte | Sparse forest | Non-endemic |
| <i>Pleione yunnanensis</i> | Kunming   | 1860 | 15.12 | 1019.14 | 72.30 | 1197.62 | 1.18 | Epiphyte | Dense forest  | Non-endemic |
| <i>Pleione yunnanensis</i> | Fuyuan    | 1900 | 13.47 | 1084.02 | 74.80 | 1096.10 | 1.01 | Epiphyte | Dense forest  | Non-endemic |
| <i>Pleione yunnanensis</i> | Kunming   | 1940 | 14.64 | 1019.14 | 72.30 | 1197.62 | 1.18 | Epiphyte | Grassy slope  | Non-endemic |
| <i>Pleione yunnanensis</i> | Gongshan  | 2000 | 12.08 | 1738.42 | 78.47 | 860.43  | 0.50 | Epiphyte | Grassy slope  | Non-endemic |
| <i>Pleione yunnanensis</i> | Dali      | 2040 | 14.58 | 1082.70 | 68.61 | 1256.27 | 1.16 | Epiphyte | Grassy slope  | Non-endemic |
| <i>Pleione yunnanensis</i> | Kunming   | 2210 | 13.02 | 1019.14 | 72.30 | 1197.62 | 1.18 | Epiphyte | Grassy slope  | Non-endemic |
| <i>Pleione yunnanensis</i> | Shuangbai | 2240 | 13.44 | 942.53  | 72.21 | 1300.52 | 1.38 | Epiphyte | Shrubland     | Non-endemic |

|                                |           |      |       |         |       |         |      |             |              |             |
|--------------------------------|-----------|------|-------|---------|-------|---------|------|-------------|--------------|-------------|
| <i>Pleione yunnanensis</i>     | Shuangbai | 2250 | 13.38 | 942.53  | 72.21 | 1300.52 | 1.38 | Epiphyte    | Grassy slope | Non-endemic |
| <i>Pleione yunnanensis</i>     | Songming  | 2270 | 11.97 | 1010.18 | 74.14 | 1134.24 | 1.12 | Epiphyte    | Dense forest | Non-endemic |
| <i>Pleione yunnanensis</i>     | Xinping   | 2300 | 12.60 | 957.31  | 74.08 | 1291.86 | 1.35 | Epiphyte    | Dense forest | Non-endemic |
| <i>Pleione yunnanensis</i>     | Kunming   | 2310 | 12.42 | 1019.14 | 72.30 | 1197.62 | 1.18 | Epiphyte    | Shrubland    | Non-endemic |
| <i>Pleione yunnanensis</i>     | Kunming   | 2330 | 12.30 | 1019.14 | 72.30 | 1197.62 | 1.18 | Epiphyte    | Dense forest | Non-endemic |
| <i>Pleione yunnanensis</i>     | Xinping   | 2380 | 12.12 | 957.31  | 74.08 | 1291.86 | 1.35 | Epiphyte    | Open site    | Non-endemic |
| <i>Pleione yunnanensis</i>     | Gongshan  | 2500 | 9.08  | 1738.42 | 78.47 | 860.43  | 0.50 | Epiphyte    | Grassy slope | Non-endemic |
| <i>Pleione yunnanensis</i>     | Fuyuan    | 2500 | 9.87  | 1084.02 | 74.80 | 1096.10 | 1.01 | Epiphyte    | Shrubland    | Non-endemic |
| <i>Pleione yunnanensis</i>     | Eshan     | 2500 | 10.21 | 938.39  | 78.62 | 1123.48 | 1.20 | Epiphyte    | Shrubland    | Non-endemic |
| <i>Pleione yunnanensis</i>     | Weixi     | 2500 | 10.43 | 970.70  | 69.95 | 1021.03 | 1.05 | Epiphyte    | Shrubland    | Non-endemic |
| <i>Pleione yunnanensis</i>     | Dali      | 2600 | 11.22 | 1082.70 | 68.61 | 1256.27 | 1.16 | Epiphyte    | Shrubland    | Non-endemic |
| <i>Pleione yunnanensis</i>     | Deqin     | 2650 | 9.27  | 639.48  | 70.85 | 896.66  | 1.40 | Epiphyte    | Dense forest | Non-endemic |
| <i>Pleione yunnanensis</i>     | Deqin     | 2650 | 9.27  | 639.48  | 70.85 | 896.66  | 1.40 | Epiphyte    | Dense forest | Non-endemic |
| <i>Pleione yunnanensis</i>     | Zhongdian | 2650 | 9.54  | 641.73  | 69.05 | 914.89  | 1.43 | Epiphyte    | Grassy slope | Non-endemic |
| <i>Pleione yunnanensis</i>     | Yangbi    | 2700 | 9.79  | 1044.23 | 72.19 | 1161.15 | 1.11 | Epiphyte    | Dense forest | Non-endemic |
| <i>Pleione yunnanensis</i>     | Wenshan   | 2800 | 8.86  | 988.87  | 76.70 | 1272.98 | 1.29 | Epiphyte    | Shrubland    | Non-endemic |
| <i>Podochilus khasianus</i>    | Menghai   | 1300 | 17.76 | 1314.38 | 80.83 | 1150.91 | 0.88 | Epiphyte    | Dense forest | Non-endemic |
| <i>Podochilus khasianus</i>    | Menghai   | 1540 | 16.32 | 1314.38 | 80.83 | 1150.91 | 0.88 | Epiphyte    | Shrubland    | Non-endemic |
| <i>Podochilus khasianus</i>    | Menghai   | 1900 | 14.16 | 1314.38 | 80.83 | 1150.91 | 0.88 | Epiphyte    | Dense forest | Non-endemic |
| <i>Pogonia japonica</i>        | Zhenxiong | 1945 | 9.77  | 899.34  | 83.70 | 852.28  | 0.95 | Terrestrial | Dense forest | Non-endemic |
| <i>Pogonia yunnanensis</i>     | Dali      | 2210 | 13.56 | 1082.70 | 68.61 | 1256.27 | 1.16 | Terrestrial | Dense forest | Non-endemic |
| <i>Pogonia yunnanensis</i>     | Gongshan  | 2300 | 10.28 | 1738.42 | 78.47 | 860.43  | 0.50 | Terrestrial | Grassy slope | Non-endemic |
| <i>Pogonia yunnanensis</i>     | Gongshan  | 3000 | 6.08  | 1738.42 | 78.47 | 860.43  | 0.50 | Terrestrial | Meadow       | Non-endemic |
| <i>Polystachya concreta</i>    | Jinghong  | 590  | 22.18 | 1161.08 | 80.46 | 1256.19 | 1.08 | Epiphyte    | Dense forest | Non-endemic |
| <i>Polystachya concreta</i>    | Jinghong  | 670  | 21.70 | 1161.08 | 80.46 | 1256.19 | 1.08 | Epiphyte    | Dense forest | Non-endemic |
| <i>Porpax ustulata</i>         | Yingjiang | 1300 | 16.59 | 1505.33 | 79.98 | 1158.19 | 0.77 | Epiphyte    | Dense forest | Non-endemic |
| <i>Porpax ustulata</i>         | Menghai   | 1450 | 16.86 | 1314.38 | 80.83 | 1150.91 | 0.88 | Epiphyte    | Dense forest | Non-endemic |
| <i>Pteroceras leopardium</i>   | Jinghong  | 700  | 21.52 | 1161.08 | 80.46 | 1256.19 | 1.08 | Epiphyte    | Dense forest | Non-endemic |
| <i>Pteroceras leopardium</i>   | Mengla    | 950  | 19.50 | 1514.70 | 84.25 | 1146.68 | 0.76 | Epiphyte    | Dense forest | Non-endemic |
| <i>Renanthera imschootiana</i> | Yuanjiang | 500  | 23.18 | 805.59  | 69.08 | 1652.32 | 2.05 | Epiphyte    | Dense forest | Endemic     |
| <i>Rhynchostylis retusa</i>    | Pingbian  | 320  | 22.90 | 1648.57 | 86.34 | 990.16  | 0.60 | Epiphyte    | Dense forest | Non-endemic |
| <i>Rhynchostylis retusa</i>    | Jinping   | 350  | 23.39 | 2305.17 | 83.81 | 1030.46 | 0.45 | Epiphyte    | Dense forest | Non-endemic |
| <i>Rhynchostylis retusa</i>    | Jinping   | 800  | 20.69 | 2305.17 | 83.81 | 1030.46 | 0.45 | Epiphyte    | Dense forest | Non-endemic |
| <i>Rhynchostylis retusa</i>    | Shizong   | 800  | 20.25 | 1204.89 | 79.59 | 1053.84 | 0.88 | Epiphyte    | Forest edge  | Non-endemic |
| <i>Rhynchostylis retusa</i>    | Shizong   | 850  | 19.95 | 1204.89 | 79.59 | 1053.84 | 0.88 | Epiphyte    | Dense forest | Non-endemic |
| <i>Rhynchostylis retusa</i>    | Jinping   | 910  | 20.03 | 2305.17 | 83.81 | 1030.46 | 0.45 | Epiphyte    | Dense forest | Non-endemic |

|                             |            |      |       |         |       |         |      |             |               |             |
|-----------------------------|------------|------|-------|---------|-------|---------|------|-------------|---------------|-------------|
| <i>Rhynchosyilis retusa</i> | Lincang    | 1500 | 17.52 | 1165.84 | 72.08 | 1167.73 | 1.00 | Epiphyte    | Dense forest  | Non-endemic |
| <i>Risleya atropurpurea</i> | Gongshan   | 3385 | 3.77  | 1738.42 | 78.47 | 860.43  | 0.50 | Saprophyte  | Dense forest  | Non-endemic |
| <i>Risleya atropurpurea</i> | Weixi      | 3500 | 4.43  | 970.70  | 69.95 | 1021.03 | 1.05 | Saprophyte  | Shrubland     | Non-endemic |
| <i>Robiquetia succisa</i>   | Jinghong   | 800  | 20.92 | 1161.08 | 80.46 | 1256.19 | 1.08 | Epiphyte    | Dense forest  | Non-endemic |
| <i>Robiquetia succisa</i>   | Jinghong   | 1100 | 19.12 | 1161.08 | 80.46 | 1256.19 | 1.08 | Epiphyte    | Dense forest  | Non-endemic |
| <i>Satyrium ciliatum</i>    | Yanshan    | 1200 | 18.26 | 1003.57 | 79.42 | 1172.21 | 1.17 | Terrestrial | Dense forest  | Non-endemic |
| <i>Satyrium ciliatum</i>    | Wenshan    | 1750 | 15.16 | 988.87  | 76.70 | 1272.98 | 1.29 | Terrestrial | Grassy slope  | Non-endemic |
| <i>Satyrium ciliatum</i>    | Shuangbai  | 1870 | 15.66 | 942.53  | 72.21 | 1300.52 | 1.38 | Terrestrial | Dense forest  | Non-endemic |
| <i>Satyrium ciliatum</i>    | Kunming    | 1900 | 14.88 | 1019.14 | 72.30 | 1197.62 | 1.18 | Terrestrial | Dense forest  | Non-endemic |
| <i>Satyrium ciliatum</i>    | Wenshan    | 2000 | 13.66 | 988.87  | 76.70 | 1272.98 | 1.29 | Terrestrial | Dense forest  | Non-endemic |
| <i>Satyrium ciliatum</i>    | Gongshan   | 2000 | 12.08 | 1738.42 | 78.47 | 860.43  | 0.50 | Terrestrial | Grassy slope  | Non-endemic |
| <i>Satyrium ciliatum</i>    | Kunming    | 2000 | 14.28 | 1019.14 | 72.30 | 1197.62 | 1.18 | Terrestrial | Grassy slope  | Non-endemic |
| <i>Satyrium ciliatum</i>    | Wenshan    | 2000 | 13.66 | 988.87  | 76.70 | 1272.98 | 1.29 | Terrestrial | Sparse forest | Non-endemic |
| <i>Satyrium ciliatum</i>    | Fuming     | 2100 | 13.37 | 871.62  | 71.93 | 1209.56 | 1.39 | Terrestrial | Dense forest  | Non-endemic |
| <i>Satyrium ciliatum</i>    | Kunming    | 2100 | 13.68 | 1019.14 | 72.30 | 1197.62 | 1.18 | Terrestrial | Grassy slope  | Non-endemic |
| <i>Satyrium ciliatum</i>    | Jiangchuan | 2100 | 13.40 | 872.74  | 74.72 | 1181.99 | 1.35 | Terrestrial | Open site     | Non-endemic |
| <i>Satyrium ciliatum</i>    | Lijiang    | 2180 | 13.99 | 982.53  | 63.24 | 1077.65 | 1.10 | Terrestrial | Meadow        | Non-endemic |
| <i>Satyrium ciliatum</i>    | Chuxiong   | 2200 | 13.37 | 874.28  | 69.99 | 1192.36 | 1.36 | Terrestrial | Dense forest  | Non-endemic |
| <i>Satyrium ciliatum</i>    | Dali       | 2200 | 13.62 | 1082.70 | 68.61 | 1256.27 | 1.16 | Terrestrial | Dense forest  | Non-endemic |
| <i>Satyrium ciliatum</i>    | Wenshan    | 2200 | 12.46 | 988.87  | 76.70 | 1272.98 | 1.29 | Terrestrial | Grassy slope  | Non-endemic |
| <i>Satyrium ciliatum</i>    | Kunming    | 2200 | 13.08 | 1019.14 | 72.30 | 1197.62 | 1.18 | Terrestrial | Grassy slope  | Non-endemic |
| <i>Satyrium ciliatum</i>    | Malipo     | 2200 | 11.06 | 1063.54 | 85.83 | 1053.97 | 0.99 | Terrestrial | Open site     | Non-endemic |
| <i>Satyrium ciliatum</i>    | Songming   | 2200 | 12.39 | 1010.18 | 74.14 | 1134.24 | 1.12 | Terrestrial | Shrubland     | Non-endemic |
| <i>Satyrium ciliatum</i>    | Heqing     | 2230 | 13.41 | 977.00  | 65.16 | 1211.84 | 1.24 | Terrestrial | Dense forest  | Non-endemic |
| <i>Satyrium ciliatum</i>    | Yongde     | 2250 | 13.63 | 1266.25 | 69.00 | 1283.63 | 1.01 | Terrestrial | Meadow        | Non-endemic |
| <i>Satyrium ciliatum</i>    | Dali       | 2250 | 13.32 | 1082.70 | 68.61 | 1256.27 | 1.16 | Terrestrial | Open site     | Non-endemic |
| <i>Satyrium ciliatum</i>    | Zhaotong   | 2300 | 9.52  | 708.66  | 74.85 | 1046.05 | 1.48 | Terrestrial | Dense forest  | Non-endemic |
| <i>Satyrium ciliatum</i>    | Gongshan   | 2300 | 10.28 | 1738.42 | 78.47 | 860.43  | 0.50 | Terrestrial | Shrubland     | Non-endemic |
| <i>Satyrium ciliatum</i>    | Heqing     | 2310 | 12.93 | 977.00  | 65.16 | 1211.84 | 1.24 | Terrestrial | Dense forest  | Non-endemic |
| <i>Satyrium ciliatum</i>    | Eshan      | 2350 | 11.11 | 938.39  | 78.62 | 1123.48 | 1.20 | Terrestrial | Dense forest  | Non-endemic |
| <i>Satyrium ciliatum</i>    | Songming   | 2370 | 11.37 | 1010.18 | 74.14 | 1134.24 | 1.12 | Terrestrial | Shrubland     | Non-endemic |
| <i>Satyrium ciliatum</i>    | Qiaojia    | 2400 | 9.22  | 878.15  | 76.01 | 1034.97 | 1.18 | Terrestrial | Forest edge   | Non-endemic |
| <i>Satyrium ciliatum</i>    | Yongde     | 2400 | 12.73 | 1266.25 | 69.00 | 1283.63 | 1.01 | Terrestrial | Forest edge   | Non-endemic |
| <i>Satyrium ciliatum</i>    | Kunming    | 2400 | 11.88 | 1019.14 | 72.30 | 1197.62 | 1.18 | Terrestrial | Grassy slope  | Non-endemic |
| <i>Satyrium ciliatum</i>    | Jingdong   | 2400 | 11.18 | 1128.40 | 76.80 | 1142.11 | 1.01 | Terrestrial | Grassy slope  | Non-endemic |
| <i>Satyrium ciliatum</i>    | Eryuan     | 2400 | 12.13 | 745.16  | 68.27 | 1210.94 | 1.63 | Terrestrial | Grassy slope  | Non-endemic |

|                          |           |      |       |         |       |         |      |             |               |             |
|--------------------------|-----------|------|-------|---------|-------|---------|------|-------------|---------------|-------------|
| <i>Satyrium ciliatum</i> | Jingdong  | 2400 | 11.18 | 1128.40 | 76.80 | 1142.11 | 1.01 | Terrestrial | Grassy slope  | Non-endemic |
| <i>Satyrium ciliatum</i> | Kunming   | 2400 | 11.88 | 1019.14 | 72.30 | 1197.62 | 1.18 | Terrestrial | Grassy slope  | Non-endemic |
| <i>Satyrium ciliatum</i> | Yangbi    | 2400 | 11.59 | 1044.23 | 72.19 | 1161.15 | 1.11 | Terrestrial | Grassy slope  | Non-endemic |
| <i>Satyrium ciliatum</i> | Kunming   | 2500 | 11.28 | 1019.14 | 72.30 | 1197.62 | 1.18 | Terrestrial | Dense forest  | Non-endemic |
| <i>Satyrium ciliatum</i> | Songming  | 2500 | 10.59 | 1010.18 | 74.14 | 1134.24 | 1.12 | Terrestrial | Dense forest  | Non-endemic |
| <i>Satyrium ciliatum</i> | Luquan    | 2500 | 10.72 | 965.09  | 73.60 | 1160.89 | 1.20 | Terrestrial | Grassy slope  | Non-endemic |
| <i>Satyrium ciliatum</i> | Jingdong  | 2540 | 10.34 | 1128.40 | 76.80 | 1142.11 | 1.01 | Terrestrial | Dense forest  | Non-endemic |
| <i>Satyrium ciliatum</i> | Weixi     | 2600 | 9.83  | 970.70  | 69.95 | 1021.03 | 1.05 | Terrestrial | Dense forest  | Non-endemic |
| <i>Satyrium ciliatum</i> | Weixi     | 2600 | 9.83  | 970.70  | 69.95 | 1021.03 | 1.05 | Terrestrial | Dense forest  | Non-endemic |
| <i>Satyrium ciliatum</i> | Yongde    | 2600 | 11.53 | 1266.25 | 69.00 | 1283.63 | 1.01 | Terrestrial | Forest edge   | Non-endemic |
| <i>Satyrium ciliatum</i> | Gongshan  | 2600 | 8.48  | 1738.42 | 78.47 | 860.43  | 0.50 | Terrestrial | Grassy slope  | Non-endemic |
| <i>Satyrium ciliatum</i> | Lijiang   | 2600 | 11.47 | 982.53  | 63.24 | 1077.65 | 1.10 | Terrestrial | Grassy slope  | Non-endemic |
| <i>Satyrium ciliatum</i> | Jingdong  | 2600 | 9.98  | 1128.40 | 76.80 | 1142.11 | 1.01 | Terrestrial | Shrubland     | Non-endemic |
| <i>Satyrium ciliatum</i> | Lijiang   | 2620 | 11.35 | 982.53  | 63.24 | 1077.65 | 1.10 | Terrestrial | Shrubland     | Non-endemic |
| <i>Satyrium ciliatum</i> | Gongshan  | 2700 | 7.88  | 1738.42 | 78.47 | 860.43  | 0.50 | Terrestrial | Dense forest  | Non-endemic |
| <i>Satyrium ciliatum</i> | Lijiang   | 2700 | 10.87 | 982.53  | 63.24 | 1077.65 | 1.10 | Terrestrial | Dense forest  | Non-endemic |
| <i>Satyrium ciliatum</i> | Yongde    | 2700 | 10.93 | 1266.25 | 69.00 | 1283.63 | 1.01 | Terrestrial | Grassy slope  | Non-endemic |
| <i>Satyrium ciliatum</i> | Lincang   | 2700 | 10.32 | 1165.84 | 72.08 | 1167.73 | 1.00 | Terrestrial | Grassy slope  | Non-endemic |
| <i>Satyrium ciliatum</i> | Dayao     | 2700 | 10.73 | 810.80  | 65.01 | 1427.38 | 1.76 | Terrestrial | Shrubland     | Non-endemic |
| <i>Satyrium ciliatum</i> | Lijiang   | 2780 | 10.39 | 982.53  | 63.24 | 1077.65 | 1.10 | Terrestrial | Dense forest  | Non-endemic |
| <i>Satyrium ciliatum</i> | Weixi     | 2800 | 8.63  | 970.70  | 69.95 | 1021.03 | 1.05 | Terrestrial | Dense forest  | Non-endemic |
| <i>Satyrium ciliatum</i> | Lijiang   | 2800 | 10.27 | 982.53  | 63.24 | 1077.65 | 1.10 | Terrestrial | Dense forest  | Non-endemic |
| <i>Satyrium ciliatum</i> | Lijiang   | 2800 | 10.27 | 982.53  | 63.24 | 1077.65 | 1.10 | Terrestrial | Dense forest  | Non-endemic |
| <i>Satyrium ciliatum</i> | Zhongdian | 2800 | 8.64  | 641.73  | 69.05 | 914.89  | 1.43 | Terrestrial | Grassy slope  | Non-endemic |
| <i>Satyrium ciliatum</i> | Heqing    | 2800 | 9.99  | 977.00  | 65.16 | 1211.84 | 1.24 | Terrestrial | Grassy slope  | Non-endemic |
| <i>Satyrium ciliatum</i> | Lijiang   | 2800 | 10.27 | 982.53  | 63.24 | 1077.65 | 1.10 | Terrestrial | Grassy slope  | Non-endemic |
| <i>Satyrium ciliatum</i> | Weixi     | 2800 | 8.63  | 970.70  | 69.95 | 1021.03 | 1.05 | Terrestrial | Grassy slope  | Non-endemic |
| <i>Satyrium ciliatum</i> | Gongshan  | 2800 | 7.28  | 1738.42 | 78.47 | 860.43  | 0.50 | Terrestrial | Grassy slope  | Non-endemic |
| <i>Satyrium ciliatum</i> | Lijiang   | 2800 | 10.27 | 982.53  | 63.24 | 1077.65 | 1.10 | Terrestrial | Shrubland     | Non-endemic |
| <i>Satyrium ciliatum</i> | Fengqing  | 2800 | 9.40  | 1352.80 | 73.24 | 1172.52 | 0.87 | Terrestrial | Shrubland     | Non-endemic |
| <i>Satyrium ciliatum</i> | Lijiang   | 2830 | 10.09 | 982.53  | 63.24 | 1077.65 | 1.10 | Terrestrial | Sparse forest | Non-endemic |
| <i>Satyrium ciliatum</i> | Dongchuan | 2880 | 8.55  | 1021.73 | 71.65 | 1186.61 | 1.16 | Terrestrial | Dense forest  | Non-endemic |
| <i>Satyrium ciliatum</i> | Weixi     | 2900 | 8.03  | 970.70  | 69.95 | 1021.03 | 1.05 | Terrestrial | Dense forest  | Non-endemic |
| <i>Satyrium ciliatum</i> | Binchuan  | 2900 | 9.30  | 573.87  | 62.93 | 1418.42 | 2.47 | Terrestrial | Dense forest  | Non-endemic |
| <i>Satyrium ciliatum</i> | Qiaojia   | 2900 | 6.22  | 878.15  | 76.01 | 1034.97 | 1.18 | Terrestrial | Dense forest  | Non-endemic |
| <i>Satyrium ciliatum</i> | Lincang   | 2900 | 9.12  | 1165.84 | 72.08 | 1167.73 | 1.00 | Terrestrial | Grassy slope  | Non-endemic |

|                           |           |      |       |         |       |         |      |             |               |             |
|---------------------------|-----------|------|-------|---------|-------|---------|------|-------------|---------------|-------------|
| <i>Satyrium ciliatum</i>  | Jingdong  | 2900 | 8.18  | 1128.40 | 76.80 | 1142.11 | 1.01 | Terrestrial | Grassy slope  | Non-endemic |
| <i>Satyrium ciliatum</i>  | Qiaojia   | 2900 | 6.22  | 878.15  | 76.01 | 1034.97 | 1.18 | Terrestrial | Meadow        | Non-endemic |
| <i>Satyrium ciliatum</i>  | Lijiang   | 2900 | 9.67  | 982.53  | 63.24 | 1077.65 | 1.10 | Terrestrial | Sparse forest | Non-endemic |
| <i>Satyrium ciliatum</i>  | Dongchuan | 3000 | 7.83  | 1021.73 | 71.65 | 1186.61 | 1.16 | Terrestrial | Grassy slope  | Non-endemic |
| <i>Satyrium ciliatum</i>  | Zhongdian | 3000 | 7.44  | 641.73  | 69.05 | 914.89  | 1.43 | Terrestrial | Grassy slope  | Non-endemic |
| <i>Satyrium ciliatum</i>  | Lijiang   | 3000 | 9.07  | 982.53  | 63.24 | 1077.65 | 1.10 | Terrestrial | Meadow        | Non-endemic |
| <i>Satyrium ciliatum</i>  | Dali      | 3029 | 8.65  | 1082.70 | 68.61 | 1256.27 | 1.16 | Terrestrial | Grassy slope  | Non-endemic |
| <i>Satyrium ciliatum</i>  | Lijiang   | 3050 | 8.77  | 982.53  | 63.24 | 1077.65 | 1.10 | Terrestrial | Dense forest  | Non-endemic |
| <i>Satyrium ciliatum</i>  | Lijiang   | 3080 | 8.59  | 982.53  | 63.24 | 1077.65 | 1.10 | Terrestrial | Meadow        | Non-endemic |
| <i>Satyrium ciliatum</i>  | Dali      | 3100 | 8.22  | 1082.70 | 68.61 | 1256.27 | 1.16 | Terrestrial | Grassy slope  | Non-endemic |
| <i>Satyrium ciliatum</i>  | Huize     | 3150 | 6.47  | 799.98  | 71.46 | 1179.17 | 1.47 | Terrestrial | Grassy slope  | Non-endemic |
| <i>Satyrium ciliatum</i>  | Luquan    | 3190 | 6.58  | 965.09  | 73.60 | 1160.89 | 1.20 | Terrestrial | Shrubland     | Non-endemic |
| <i>Satyrium ciliatum</i>  | Dali      | 3200 | 7.62  | 1082.70 | 68.61 | 1256.27 | 1.16 | Terrestrial | Grassy slope  | Non-endemic |
| <i>Satyrium ciliatum</i>  | Luquan    | 3200 | 6.52  | 965.09  | 73.60 | 1160.89 | 1.20 | Terrestrial | Grassy slope  | Non-endemic |
| <i>Satyrium ciliatum</i>  | Huize     | 3200 | 6.17  | 799.98  | 71.46 | 1179.17 | 1.47 | Terrestrial | Meadow        | Non-endemic |
| <i>Satyrium ciliatum</i>  | Lanping   | 3200 | 6.09  | 989.98  | 74.21 | 939.09  | 0.95 | Terrestrial | Open site     | Non-endemic |
| <i>Satyrium ciliatum</i>  | Zhongdian | 3300 | 5.64  | 641.73  | 69.05 | 914.89  | 1.43 | Terrestrial | Meadow        | Non-endemic |
| <i>Satyrium ciliatum</i>  | Zhongdian | 3350 | 5.34  | 641.73  | 69.05 | 914.89  | 1.43 | Terrestrial | Grassy slope  | Non-endemic |
| <i>Satyrium ciliatum</i>  | Lijiang   | 3360 | 6.91  | 982.53  | 63.24 | 1077.65 | 1.10 | Terrestrial | Shrubland     | Non-endemic |
| <i>Satyrium ciliatum</i>  | Weixi     | 3400 | 5.03  | 970.70  | 69.95 | 1021.03 | 1.05 | Terrestrial | Dense forest  | Non-endemic |
| <i>Satyrium ciliatum</i>  | Zhongdian | 3500 | 4.44  | 641.73  | 69.05 | 914.89  | 1.43 | Terrestrial | Dense forest  | Non-endemic |
| <i>Satyrium ciliatum</i>  | Lijiang   | 3500 | 6.07  | 982.53  | 63.24 | 1077.65 | 1.10 | Terrestrial | Grassy slope  | Non-endemic |
| <i>Satyrium ciliatum</i>  | Heqing    | 3500 | 5.79  | 977.00  | 65.16 | 1211.84 | 1.24 | Terrestrial | Grassy slope  | Non-endemic |
| <i>Satyrium ciliatum</i>  | Zhongdian | 3600 | 3.84  | 641.73  | 69.05 | 914.89  | 1.43 | Terrestrial | Dense forest  | Non-endemic |
| <i>Satyrium ciliatum</i>  | Deqin     | 3630 | 3.39  | 639.48  | 70.85 | 896.66  | 1.40 | Terrestrial | Dense forest  | Non-endemic |
| <i>Satyrium ciliatum</i>  | Weixi     | 3650 | 3.53  | 970.70  | 69.95 | 1021.03 | 1.05 | Terrestrial | Shrubland     | Non-endemic |
| <i>Satyrium ciliatum</i>  | Weixi     | 3650 | 3.53  | 970.70  | 69.95 | 1021.03 | 1.05 | Terrestrial | Shrubland     | Non-endemic |
| <i>Satyrium ciliatum</i>  | Zhongdian | 3800 | 2.64  | 641.73  | 69.05 | 914.89  | 1.43 | Terrestrial | Meadow        | Non-endemic |
| <i>Satyrium ciliatum</i>  | Fugong    | 4000 | 0.06  | 1441.43 | 79.99 | 906.18  | 0.63 | Terrestrial | Dense forest  | Non-endemic |
| <i>Satyrium ciliatum</i>  | Fugong    | 4000 | 0.06  | 1441.43 | 79.99 | 906.18  | 0.63 | Terrestrial | Dense forest  | Non-endemic |
| <i>Satyrium ciliatum</i>  | Luquan    | 4000 | 1.72  | 965.09  | 73.60 | 1160.89 | 1.20 | Terrestrial | Grassy slope  | Non-endemic |
| <i>Satyrium nepalense</i> | Yuanjiang | 1100 | 19.58 | 805.59  | 69.08 | 1652.32 | 2.05 | Terrestrial | Grassy slope  | Non-endemic |
| <i>Satyrium nepalense</i> | Lancang   | 1200 | 18.50 | 1596.50 | 77.88 | 1183.80 | 0.74 | Terrestrial | Grassy slope  | Non-endemic |
| <i>Satyrium nepalense</i> | Yuliang   | 1800 | 14.72 | 905.45  | 75.03 | 1218.48 | 1.35 | Terrestrial | Grassy slope  | Non-endemic |
| <i>Satyrium nepalense</i> | Baoshan   | 1830 | 14.78 | 992.38  | 73.87 | 1160.15 | 1.17 | Terrestrial | Dense forest  | Non-endemic |
| <i>Satyrium nepalense</i> | Jingdong  | 1900 | 14.18 | 1128.40 | 76.80 | 1142.11 | 1.01 | Terrestrial | Grassy slope  | Non-endemic |



|                             |           |      |       |         |       |         |      |             |               |             |
|-----------------------------|-----------|------|-------|---------|-------|---------|------|-------------|---------------|-------------|
| <i>Satyrium nepalense</i>   | Jingdong  | 2000 | 13.58 | 1128.40 | 76.80 | 1142.11 | 1.01 | Terrestrial | Grassy slope  | Non-endemic |
| <i>Satyrium nepalense</i>   | Gongshan  | 2200 | 10.88 | 1738.42 | 78.47 | 860.43  | 0.50 | Terrestrial | Dense forest  | Non-endemic |
| <i>Satyrium nepalensis</i>  | Yongde    | 2700 | 10.93 | 1266.25 | 69.00 | 1283.63 | 1.01 | Terrestrial | Grassy slope  | Non-endemic |
| <i>Satyrium yunnanense</i>  | Lincang   | 2100 | 13.92 | 1165.84 | 72.08 | 1167.73 | 1.00 | Terrestrial | Grassy slope  | Non-endemic |
| <i>Satyrium yunnanense</i>  | Dali      | 2320 | 12.90 | 1082.70 | 68.61 | 1256.27 | 1.16 | Terrestrial | Dense forest  | Non-endemic |
| <i>Satyrium yunnanense</i>  | Heqing    | 2350 | 12.69 | 977.00  | 65.16 | 1211.84 | 1.24 | Terrestrial | Forest edge   | Non-endemic |
| <i>Satyrium yunnanense</i>  | Lijiang   | 2400 | 12.67 | 982.53  | 63.24 | 1077.65 | 1.10 | Terrestrial | Dense forest  | Non-endemic |
| <i>Satyrium yunnanense</i>  | Kunming   | 2400 | 11.88 | 1019.14 | 72.30 | 1197.62 | 1.18 | Terrestrial | Shrubland     | Non-endemic |
| <i>Satyrium yunnanense</i>  | Zhongdian | 2400 | 11.04 | 641.73  | 69.05 | 914.89  | 1.43 | Terrestrial | Shrubland     | Non-endemic |
| <i>Satyrium yunnanense</i>  | Dali      | 2450 | 12.12 | 1082.70 | 68.61 | 1256.27 | 1.16 | Terrestrial | Dense forest  | Non-endemic |
| <i>Satyrium yunnanense</i>  | Eryuan    | 2500 | 11.53 | 745.16  | 68.27 | 1210.94 | 1.63 | Terrestrial | Grassy slope  | Non-endemic |
| <i>Satyrium yunnanense</i>  | Dali      | 2500 | 11.82 | 1082.70 | 68.61 | 1256.27 | 1.16 | Terrestrial | Shrubland     | Non-endemic |
| <i>Satyrium yunnanense</i>  | Wuding    | 2530 | 10.21 | 988.68  | 74.74 | 1188.19 | 1.20 | Terrestrial | Dense forest  | Non-endemic |
| <i>Satyrium yunnanense</i>  | Lijiang   | 2540 | 11.83 | 982.53  | 63.24 | 1077.65 | 1.10 | Terrestrial | Sparse forest | Non-endemic |
| <i>Satyrium yunnanense</i>  | Wuding    | 2570 | 9.97  | 988.68  | 74.74 | 1188.19 | 1.20 | Terrestrial | Dense forest  | Non-endemic |
| <i>Satyrium yunnanense</i>  | Lijiang   | 2610 | 11.41 | 982.53  | 63.24 | 1077.65 | 1.10 | Terrestrial | Grassy slope  | Non-endemic |
| <i>Satyrium yunnanense</i>  | Heqing    | 2700 | 10.59 | 977.00  | 65.16 | 1211.84 | 1.24 | Terrestrial | Grassy slope  | Non-endemic |
| <i>Satyrium yunnanense</i>  | Lijiang   | 2780 | 10.39 | 982.53  | 63.24 | 1077.65 | 1.10 | Terrestrial | Forest edge   | Non-endemic |
| <i>Satyrium yunnanense</i>  | Zhongdian | 2800 | 8.64  | 641.73  | 69.05 | 914.89  | 1.43 | Terrestrial | Grassy slope  | Non-endemic |
| <i>Satyrium yunnanense</i>  | Lijiang   | 2800 | 10.27 | 982.53  | 63.24 | 1077.65 | 1.10 | Terrestrial | Grassy slope  | Non-endemic |
| <i>Satyrium yunnanense</i>  | Lijiang   | 3100 | 8.47  | 982.53  | 63.24 | 1077.65 | 1.10 | Terrestrial | Grassy slope  | Non-endemic |
| <i>Satyrium yunnanense</i>  | Zhongdian | 3250 | 5.94  | 641.73  | 69.05 | 914.89  | 1.43 | Terrestrial | Grassy slope  | Non-endemic |
| <i>Schoenorchis gemmata</i> | Malipo    | 980  | 18.38 | 1063.54 | 85.83 | 1053.97 | 0.99 | Epiphyte    | Dense forest  | Non-endemic |
| <i>Schoenorchis gemmata</i> | Xichou    | 1200 | 17.73 | 1267.54 | 82.98 | 985.97  | 0.78 | Epiphyte    | Dense forest  | Non-endemic |
| <i>Schoenorchis gemmata</i> | Pingbian  | 1300 | 17.02 | 1648.57 | 86.34 | 990.16  | 0.60 | Epiphyte    | Dense forest  | Non-endemic |
| <i>Schoenorchis gemmata</i> | Xichou    | 1300 | 17.13 | 1267.54 | 82.98 | 985.97  | 0.78 | Epiphyte    | Dense forest  | Non-endemic |
| <i>Schoenorchis gemmata</i> | Gongshan  | 1350 | 15.98 | 1738.42 | 78.47 | 860.43  | 0.50 | Epiphyte    | Dense forest  | Non-endemic |
| <i>Schoenorchis gemmata</i> | Gongshan  | 1380 | 15.80 | 1738.42 | 78.47 | 860.43  | 0.50 | Epiphyte    | Dense forest  | Non-endemic |
| <i>Schoenorchis gemmata</i> | Gongshan  | 1380 | 15.80 | 1738.42 | 78.47 | 860.43  | 0.50 | Epiphyte    | Dense forest  | Non-endemic |
| <i>Schoenorchis gemmata</i> | Gongshan  | 1400 | 15.68 | 1738.42 | 78.47 | 860.43  | 0.50 | Epiphyte    | Dense forest  | Non-endemic |
| <i>Schoenorchis gemmata</i> | Gongshan  | 1400 | 15.68 | 1738.42 | 78.47 | 860.43  | 0.50 | Epiphyte    | Dense forest  | Non-endemic |
| <i>Schoenorchis gemmata</i> | Gongshan  | 1450 | 15.38 | 1738.42 | 78.47 | 860.43  | 0.50 | Epiphyte    | Dense forest  | Non-endemic |
| <i>Schoenorchis gemmata</i> | Gongshan  | 1500 | 15.08 | 1738.42 | 78.47 | 860.43  | 0.50 | Epiphyte    | Dense forest  | Non-endemic |
| <i>Schoenorchis gemmata</i> | Jinping   | 1500 | 16.49 | 2305.17 | 83.81 | 1030.46 | 0.45 | Epiphyte    | Dense forest  | Non-endemic |
| <i>Schoenorchis gemmata</i> | Gongshan  | 1540 | 14.84 | 1738.42 | 78.47 | 860.43  | 0.50 | Epiphyte    | Dense forest  | Non-endemic |
| <i>Schoenorchis gemmata</i> | Gongshan  | 1550 | 14.78 | 1738.42 | 78.47 | 860.43  | 0.50 | Epiphyte    | Dense forest  | Non-endemic |

|                                 |             |      |       |         |       |         |      |             |               |             |
|---------------------------------|-------------|------|-------|---------|-------|---------|------|-------------|---------------|-------------|
| <i>Schoenorchis gemmata</i>     | Gongshan    | 1580 | 14.60 | 1738.42 | 78.47 | 860.43  | 0.50 | Epiphyte    | Dense forest  | Non-endemic |
| <i>Schoenorchis gemmata</i>     | Gongshan    | 1580 | 14.60 | 1738.42 | 78.47 | 860.43  | 0.50 | Epiphyte    | Dense forest  | Non-endemic |
| <i>Schoenorchis gemmata</i>     | Gongshan    | 1620 | 14.36 | 1738.42 | 78.47 | 860.43  | 0.50 | Epiphyte    | Dense forest  | Non-endemic |
| <i>Schoenorchis gemmata</i>     | Gongshan    | 1700 | 13.88 | 1738.42 | 78.47 | 860.43  | 0.50 | Epiphyte    | Dense forest  | Non-endemic |
| <i>Schoenorchis gemmata</i>     | Gongshan    | 1700 | 13.88 | 1738.42 | 78.47 | 860.43  | 0.50 | Epiphyte    | Dense forest  | Non-endemic |
| <i>Schoenorchis gemmata</i>     | Jinping     | 1750 | 14.99 | 2305.17 | 83.81 | 1030.46 | 0.45 | Epiphyte    | Dense forest  | Non-endemic |
| <i>Schoenorchis gemmata</i>     | Yongde      | 2000 | 15.13 | 1266.25 | 69.00 | 1283.63 | 1.01 | Epiphyte    | Dense forest  | Non-endemic |
| <i>Schoenorchis gemmata</i>     | Gongshan    | 2000 | 12.08 | 1738.42 | 78.47 | 860.43  | 0.50 | Epiphyte    | Dense forest  | Non-endemic |
| <i>Schoenorchis gemmata</i>     | Gongshan    | 2000 | 12.08 | 1738.42 | 78.47 | 860.43  | 0.50 | Epiphyte    | Dense forest  | Non-endemic |
| <i>Schoenorchis hainanensis</i> | Jinping     | 1600 | 15.89 | 2305.17 | 83.81 | 1030.46 | 0.45 | Epiphyte    | Dense forest  | Non-endemic |
| <i>Schoenorchis tixieri</i>     | Mengla      | 1000 | 19.20 | 1514.70 | 84.25 | 1146.68 | 0.76 | Epiphyte    | Dense forest  | Endemic     |
| <i>Sedirea japonica</i>         | Yingjiang   | 1350 | 16.29 | 1505.33 | 79.98 | 1158.19 | 0.77 | Epiphyte    | dense forest  | Non-endemic |
| <i>Spathoglottis pubescens</i>  | Mengla      | 1040 | 18.96 | 1514.70 | 84.25 | 1146.68 | 0.76 | Terrestrial | Dense forest  | Non-endemic |
| <i>Spathoglottis pubescens</i>  | Lincang     | 1200 | 19.32 | 1165.84 | 72.08 | 1167.73 | 1.00 | Terrestrial | Dense forest  | Non-endemic |
| <i>Spathoglottis pubescens</i>  | Pingbian    | 1200 | 17.62 | 1648.57 | 86.34 | 990.16  | 0.60 | Terrestrial | Dense forest  | Non-endemic |
| <i>Spathoglottis pubescens</i>  | Hekou       | 1250 | 16.25 | 1768.58 | 84.25 | 1166.26 | 0.66 | Terrestrial | Grassy slope  | Non-endemic |
| <i>Spathoglottis pubescens</i>  | Yanshan     | 1250 | 17.96 | 1003.57 | 79.42 | 1172.21 | 1.17 | Terrestrial | Grassy slope  | Non-endemic |
| <i>Spathoglottis pubescens</i>  | Tengchong   | 1320 | 17.08 | 1501.45 | 78.06 | 857.93  | 0.57 | Terrestrial | Dense forest  | Non-endemic |
| <i>Spathoglottis pubescens</i>  | Pingbian    | 1400 | 16.42 | 1648.57 | 86.34 | 990.16  | 0.60 | Terrestrial | Dense forest  | Non-endemic |
| <i>Spathoglottis pubescens</i>  | Shuangjiang | 1500 | 16.98 | 1006.64 | 75.26 | 1272.13 | 1.26 | Terrestrial | Sparse forest | Non-endemic |
| <i>Spathoglottis pubescens</i>  | Tengchong   | 1550 | 15.70 | 1501.45 | 78.06 | 857.93  | 0.57 | Terrestrial | Dense forest  | Non-endemic |
| <i>Spathoglottis pubescens</i>  | Menglian    | 1600 | 15.98 | 1357.68 | 80.47 | 1185.94 | 0.87 | Terrestrial | Grassy slope  | Non-endemic |
| <i>Spathoglottis pubescens</i>  | Yuxi        | 1650 | 15.87 | 928.04  | 74.41 | 1159.15 | 1.25 | Terrestrial | Open site     | Non-endemic |
| <i>Spathoglottis pubescens</i>  | Dayao       | 1700 | 16.73 | 810.80  | 65.01 | 1427.38 | 1.76 | Terrestrial | Grassy slope  | Non-endemic |
| <i>Spathoglottis pubescens</i>  | Zhenkang    | 1700 | 14.64 | 1602.96 | 81.14 | 1089.09 | 0.68 | Terrestrial | Grassy slope  | Non-endemic |
| <i>Spathoglottis pubescens</i>  | Maguan      | 1750 | 14.51 | 1330.52 | 83.25 | 1086.43 | 0.82 | Terrestrial | Grassy slope  | Non-endemic |
| <i>Spathoglottis pubescens</i>  | Yuxi        | 1800 | 14.97 | 928.04  | 74.41 | 1159.15 | 1.25 | Terrestrial | Forest edge   | Non-endemic |
| <i>Spathoglottis pubescens</i>  | Jingdong    | 1900 | 14.18 | 1128.40 | 76.80 | 1142.11 | 1.01 | Terrestrial | Dense forest  | Non-endemic |
| <i>Spathoglottis pubescens</i>  | Kunming     | 1900 | 14.88 | 1019.14 | 72.30 | 1197.62 | 1.18 | Terrestrial | Grassy slope  | Non-endemic |
| <i>Spathoglottis pubescens</i>  | Dali        | 1920 | 15.30 | 1082.70 | 68.61 | 1256.27 | 1.16 | Terrestrial | Dense forest  | Non-endemic |
| <i>Spathoglottis pubescens</i>  | Hekou       | 2000 | 11.75 | 1768.58 | 84.25 | 1166.26 | 0.66 | Terrestrial | Open site     | Non-endemic |
| <i>Spathoglottis pubescens</i>  | Dali        | 2030 | 14.64 | 1082.70 | 68.61 | 1256.27 | 1.16 | Terrestrial | Dense forest  | Non-endemic |
| <i>Spathoglottis pubescens</i>  | Dali        | 2040 | 14.58 | 1082.70 | 68.61 | 1256.27 | 1.16 | Terrestrial | Grassy slope  | Non-endemic |
| <i>Spathoglottis pubescens</i>  | Kunming     | 2070 | 13.86 | 1019.14 | 72.30 | 1197.62 | 1.18 | Terrestrial | Open site     | Non-endemic |
| <i>Spathoglottis pubescens</i>  | Kunming     | 2150 | 13.38 | 1019.14 | 72.30 | 1197.62 | 1.18 | Terrestrial | Dense forest  | Non-endemic |
| <i>Spathoglottis pubescens</i>  | Heqing      | 2200 | 13.59 | 977.00  | 65.16 | 1211.84 | 1.24 | Terrestrial | Grassy slope  | Non-endemic |

|                                |            |      |       |         |       |         |      |             |               |             |
|--------------------------------|------------|------|-------|---------|-------|---------|------|-------------|---------------|-------------|
| <i>Spathoglottis pubescens</i> | Dali       | 2280 | 13.14 | 1082.70 | 68.61 | 1256.27 | 1.16 | Terrestrial | Dense forest  | Non-endemic |
| <i>Spathoglottis pubescens</i> | Yuxi       | 2350 | 11.67 | 928.04  | 74.41 | 1159.15 | 1.25 | Terrestrial | Grassy slope  | Non-endemic |
| <i>Spiranthes sinensis</i>     | Xichou     | 1250 | 17.43 | 1267.54 | 82.98 | 985.97  | 0.78 | Terrestrial | Grassy slope  | Non-endemic |
| <i>Spiranthes sinensis</i>     | Weixin     | 1450 | 11.74 | 1041.32 | 84.86 | 804.04  | 0.77 | Terrestrial | Grassy slope  | Non-endemic |
| <i>Spiranthes sinensis</i>     | Xichou     | 1460 | 16.17 | 1267.54 | 82.98 | 985.97  | 0.78 | Terrestrial | Grassy slope  | Non-endemic |
| <i>Spiranthes sinensis</i>     | Gongshan   | 1500 | 15.08 | 1738.42 | 78.47 | 860.43  | 0.50 | Terrestrial | Dense forest  | Non-endemic |
| <i>Spiranthes sinensis</i>     | Dali       | 1500 | 17.82 | 1082.70 | 68.61 | 1256.27 | 1.16 | Terrestrial | Grassy slope  | Non-endemic |
| <i>Spiranthes sinensis</i>     | Heqing     | 1500 | 17.79 | 977.00  | 65.16 | 1211.84 | 1.24 | Terrestrial | Open site     | Non-endemic |
| <i>Spiranthes sinensis</i>     | Gongshan   | 1550 | 14.78 | 1738.42 | 78.47 | 860.43  | 0.50 | Terrestrial | Open site     | Non-endemic |
| <i>Spiranthes sinensis</i>     | Luchun     | 1600 | 17.10 | 2013.54 | 78.64 | 1151.56 | 0.57 | Terrestrial | Open site     | Non-endemic |
| <i>Spiranthes sinensis</i>     | Jingdong   | 1600 | 15.98 | 1128.40 | 76.80 | 1142.11 | 1.01 | Terrestrial | Shrubland     | Non-endemic |
| <i>Spiranthes sinensis</i>     | Luchun     | 1620 | 16.98 | 2013.54 | 78.64 | 1151.56 | 0.57 | Terrestrial | Open site     | Non-endemic |
| <i>Spiranthes sinensis</i>     | Eshan      | 1700 | 15.01 | 938.39  | 78.62 | 1123.48 | 1.20 | Terrestrial | Forest edge   | Non-endemic |
| <i>Spiranthes sinensis</i>     | Eshan      | 1750 | 14.71 | 938.39  | 78.62 | 1123.48 | 1.20 | Terrestrial | Dense forest  | Non-endemic |
| <i>Spiranthes sinensis</i>     | Jiangchuan | 1780 | 15.32 | 872.74  | 74.72 | 1181.99 | 1.35 | Terrestrial | Grassy slope  | Non-endemic |
| <i>Spiranthes sinensis</i>     | Jingdong   | 1800 | 14.78 | 1128.40 | 76.80 | 1142.11 | 1.01 | Terrestrial | Grassy slope  | Non-endemic |
| <i>Spiranthes sinensis</i>     | Gongshan   | 1800 | 13.28 | 1738.42 | 78.47 | 860.43  | 0.50 | Terrestrial | Open site     | Non-endemic |
| <i>Spiranthes sinensis</i>     | Anning     | 1820 | 15.11 | 896.67  | 71.23 | 1167.91 | 1.30 | Terrestrial | Meadow        | Non-endemic |
| <i>Spiranthes sinensis</i>     | Kunming    | 1900 | 14.88 | 1019.14 | 72.30 | 1197.62 | 1.18 | Terrestrial | Shrubland     | Non-endemic |
| <i>Spiranthes sinensis</i>     | Jinping    | 1900 | 14.09 | 2305.17 | 83.81 | 1030.46 | 0.45 | Terrestrial | Sparse forest | Non-endemic |
| <i>Spiranthes sinensis</i>     | Daguan     | 1950 | 10.12 | 987.00  | 80.05 | 896.37  | 0.91 | Terrestrial | Dense forest  | Non-endemic |
| <i>Spiranthes sinensis</i>     | Eryuan     | 1950 | 14.83 | 745.16  | 68.27 | 1210.94 | 1.63 | Terrestrial | Grassy slope  | Non-endemic |
| <i>Spiranthes sinensis</i>     | Yongde     | 2000 | 15.13 | 1266.25 | 69.00 | 1283.63 | 1.01 | Terrestrial | Dense forest  | Non-endemic |
| <i>Spiranthes sinensis</i>     | Kunming    | 2050 | 13.98 | 1019.14 | 72.30 | 1197.62 | 1.18 | Terrestrial | Grassy slope  | Non-endemic |
| <i>Spiranthes sinensis</i>     | Dali       | 2080 | 14.34 | 1082.70 | 68.61 | 1256.27 | 1.16 | Terrestrial | Dense forest  | Non-endemic |
| <i>Spiranthes sinensis</i>     | Jingdong   | 2100 | 12.98 | 1128.40 | 76.80 | 1142.11 | 1.01 | Terrestrial | Dense forest  | Non-endemic |
| <i>Spiranthes sinensis</i>     | Gongshan   | 2100 | 11.48 | 1738.42 | 78.47 | 860.43  | 0.50 | Terrestrial | Grassy slope  | Non-endemic |
| <i>Spiranthes sinensis</i>     | Tengchong  | 2100 | 12.40 | 1501.45 | 78.06 | 857.93  | 0.57 | Terrestrial | Grassy slope  | Non-endemic |
| <i>Spiranthes sinensis</i>     | Anning     | 2150 | 13.13 | 896.67  | 71.23 | 1167.91 | 1.30 | Terrestrial | Dense forest  | Non-endemic |
| <i>Spiranthes sinensis</i>     | Heqing     | 2160 | 13.83 | 977.00  | 65.16 | 1211.84 | 1.24 | Terrestrial | Open site     | Non-endemic |
| <i>Spiranthes sinensis</i>     | Heqing     | 2200 | 13.59 | 977.00  | 65.16 | 1211.84 | 1.24 | Terrestrial | Grassy slope  | Non-endemic |
| <i>Spiranthes sinensis</i>     | Jianchuan  | 2200 | 12.35 | 753.13  | 70.16 | 1154.48 | 1.53 | Terrestrial | Open site     | Non-endemic |
| <i>Spiranthes sinensis</i>     | Heqing     | 2260 | 13.23 | 977.00  | 65.16 | 1211.84 | 1.24 | Terrestrial | Forest edge   | Non-endemic |
| <i>Spiranthes sinensis</i>     | Weixi      | 2300 | 11.63 | 970.70  | 69.95 | 1021.03 | 1.05 | Terrestrial | Meadow        | Non-endemic |
| <i>Spiranthes sinensis</i>     | Deqin      | 2300 | 11.37 | 639.48  | 70.85 | 896.66  | 1.40 | Terrestrial | Shrubland     | Non-endemic |
| <i>Spiranthes sinensis</i>     | Lijiang    | 2320 | 13.15 | 982.53  | 63.24 | 1077.65 | 1.10 | Terrestrial | Open site     | Non-endemic |

|                            |           |      |       |         |       |         |      |             |              |             |
|----------------------------|-----------|------|-------|---------|-------|---------|------|-------------|--------------|-------------|
| <i>Spiranthes sinensis</i> | Kunming   | 2350 | 12.18 | 1019.14 | 72.30 | 1197.62 | 1.18 | Terrestrial | Grassy slope | Non-endemic |
| <i>Spiranthes sinensis</i> | Songming  | 2380 | 11.31 | 1010.18 | 74.14 | 1134.24 | 1.12 | Terrestrial | Grassy slope | Non-endemic |
| <i>Spiranthes sinensis</i> | Kunming   | 2400 | 11.88 | 1019.14 | 72.30 | 1197.62 | 1.18 | Terrestrial | Dense forest | Non-endemic |
| <i>Spiranthes sinensis</i> | Lijiang   | 2400 | 12.67 | 982.53  | 63.24 | 1077.65 | 1.10 | Terrestrial | Grassy slope | Non-endemic |
| <i>Spiranthes sinensis</i> | Yongde    | 2400 | 12.73 | 1266.25 | 69.00 | 1283.63 | 1.01 | Terrestrial | Grassy slope | Non-endemic |
| <i>Spiranthes sinensis</i> | Jingdong  | 2400 | 11.18 | 1128.40 | 76.80 | 1142.11 | 1.01 | Terrestrial | Shrubland    | Non-endemic |
| <i>Spiranthes sinensis</i> | Lijiang   | 2410 | 12.61 | 982.53  | 63.24 | 1077.65 | 1.10 | Terrestrial | Meadow       | Non-endemic |
| <i>Spiranthes sinensis</i> | Yangbi    | 2500 | 10.99 | 1044.23 | 72.19 | 1161.15 | 1.11 | Terrestrial | Dense forest | Non-endemic |
| <i>Spiranthes sinensis</i> | Yangbi    | 2500 | 10.99 | 1044.23 | 72.19 | 1161.15 | 1.11 | Terrestrial | Dense forest | Non-endemic |
| <i>Spiranthes sinensis</i> | Lijiang   | 2500 | 12.07 | 982.53  | 63.24 | 1077.65 | 1.10 | Terrestrial | Open site    | Non-endemic |
| <i>Spiranthes sinensis</i> | Yongde    | 2500 | 12.13 | 1266.25 | 69.00 | 1283.63 | 1.01 | Terrestrial | Open site    | Non-endemic |
| <i>Spiranthes sinensis</i> | Wuding    | 2550 | 10.09 | 988.68  | 74.74 | 1188.19 | 1.20 | Terrestrial | Grassy slope | Non-endemic |
| <i>Spiranthes sinensis</i> | Wuding    | 2550 | 10.09 | 988.68  | 74.74 | 1188.19 | 1.20 | Terrestrial | Shrubland    | Non-endemic |
| <i>Spiranthes sinensis</i> | Wuding    | 2560 | 10.03 | 988.68  | 74.74 | 1188.19 | 1.20 | Terrestrial | Open site    | Non-endemic |
| <i>Spiranthes sinensis</i> | Kunming   | 2600 | 10.68 | 1019.14 | 72.30 | 1197.62 | 1.18 | Terrestrial | Grassy slope | Non-endemic |
| <i>Spiranthes sinensis</i> | Heqing    | 2600 | 11.19 | 977.00  | 65.16 | 1211.84 | 1.24 | Terrestrial | Grassy slope | Non-endemic |
| <i>Spiranthes sinensis</i> | Lijiang   | 2700 | 10.87 | 982.53  | 63.24 | 1077.65 | 1.10 | Terrestrial | Grassy slope | Non-endemic |
| <i>Spiranthes sinensis</i> | Lijiang   | 2700 | 10.87 | 982.53  | 63.24 | 1077.65 | 1.10 | Terrestrial | Grassy slope | Non-endemic |
| <i>Spiranthes sinensis</i> | Lijiang   | 2720 | 10.75 | 982.53  | 63.24 | 1077.65 | 1.10 | Terrestrial | Shrubland    | Non-endemic |
| <i>Spiranthes sinensis</i> | Zhongdian | 2800 | 8.64  | 641.73  | 69.05 | 914.89  | 1.43 | Terrestrial | Grassy slope | Non-endemic |
| <i>Spiranthes sinensis</i> | Lijiang   | 2850 | 9.97  | 982.53  | 63.24 | 1077.65 | 1.10 | Terrestrial | Dense forest | Non-endemic |
| <i>Spiranthes sinensis</i> | Dongchuan | 2890 | 8.49  | 1021.73 | 71.65 | 1186.61 | 1.16 | Terrestrial | Meadow       | Non-endemic |
| <i>Spiranthes sinensis</i> | Dongchuan | 2900 | 8.43  | 1021.73 | 71.65 | 1186.61 | 1.16 | Terrestrial | Grassy slope | Non-endemic |
| <i>Spiranthes sinensis</i> | Qiaojia   | 2900 | 6.22  | 878.15  | 76.01 | 1034.97 | 1.18 | Terrestrial | Meadow       | Non-endemic |
| <i>Spiranthes sinensis</i> | Lijiang   | 3000 | 9.07  | 982.53  | 63.24 | 1077.65 | 1.10 | Terrestrial | Forest edge  | Non-endemic |
| <i>Spiranthes sinensis</i> | Dongchuan | 3000 | 7.83  | 1021.73 | 71.65 | 1186.61 | 1.16 | Terrestrial | Grassy slope | Non-endemic |
| <i>Spiranthes sinensis</i> | Gongshan  | 3000 | 6.08  | 1738.42 | 78.47 | 860.43  | 0.50 | Terrestrial | Meadow       | Non-endemic |
| <i>Spiranthes sinensis</i> | Dali      | 3100 | 8.22  | 1082.70 | 68.61 | 1256.27 | 1.16 | Terrestrial | Grassy slope | Non-endemic |
| <i>Spiranthes sinensis</i> | Dali      | 3100 | 8.22  | 1082.70 | 68.61 | 1256.27 | 1.16 | Terrestrial | Grassy slope | Non-endemic |
| <i>Spiranthes sinensis</i> | Lijiang   | 3100 | 8.47  | 982.53  | 63.24 | 1077.65 | 1.10 | Terrestrial | Meadow       | Non-endemic |
| <i>Spiranthes sinensis</i> | Lijiang   | 3145 | 8.20  | 982.53  | 63.24 | 1077.65 | 1.10 | Terrestrial | Forest edge  | Non-endemic |
| <i>Spiranthes sinensis</i> | Zhongdian | 3200 | 6.24  | 641.73  | 69.05 | 914.89  | 1.43 | Terrestrial | Grassy slope | Non-endemic |
| <i>Spiranthes sinensis</i> | Zhongdian | 3200 | 6.24  | 641.73  | 69.05 | 914.89  | 1.43 | Terrestrial | Meadow       | Non-endemic |
| <i>Spiranthes sinensis</i> | Zhongdian | 3200 | 6.24  | 641.73  | 69.05 | 914.89  | 1.43 | Terrestrial | Meadow       | Non-endemic |
| <i>Spiranthes sinensis</i> | Zhongdian | 3300 | 5.64  | 641.73  | 69.05 | 914.89  | 1.43 | Terrestrial | Grassy slope | Non-endemic |
| <i>Spiranthes sinensis</i> | Huize     | 3400 | 4.97  | 799.98  | 71.46 | 1179.17 | 1.47 | Terrestrial | Meadow       | Non-endemic |

|                                               |           |      |       |         |       |         |      |             |              |             |
|-----------------------------------------------|-----------|------|-------|---------|-------|---------|------|-------------|--------------|-------------|
| <i>Spiranthes sinensis</i>                    | Zhongdian | 3600 | 3.84  | 641.73  | 69.05 | 914.89  | 1.43 | Terrestrial | Shrubland    | Non-endemic |
| <i>Spiranthes sinensis</i> var. <i>amoena</i> | Dali      | 1800 | 16.02 | 1082.70 | 68.61 | 1256.27 | 1.16 | Terrestrial | Grassy slope | Non-endemic |
| <i>Spiranthes sinensis</i> var. <i>amoena</i> | Dali      | 2100 | 14.22 | 1082.70 | 68.61 | 1256.27 | 1.16 | Terrestrial | Grassy slope | Non-endemic |
| <i>Spiranthes sinensis</i> var. <i>amoena</i> | Dali      | 2100 | 14.22 | 1082.70 | 68.61 | 1256.27 | 1.16 | Terrestrial | Grassy slope | Non-endemic |
| <i>Staurochilus dawsoniana</i>                | Mengla    | 600  | 21.60 | 1514.70 | 84.25 | 1146.68 | 0.76 | Epiphyte    | Forest edge  | Non-endemic |
| <i>Staurochilus dawsoniana</i>                | Mengla    | 700  | 21.00 | 1514.70 | 84.25 | 1146.68 | 0.76 | Epiphyte    | Dense forest | Non-endemic |
| <i>Staurochilus loratus</i>                   | Mengla    | 700  | 21.00 | 1514.70 | 84.25 | 1146.68 | 0.76 | Epiphyte    | Forest edge  | Non-endemic |
| <i>Staurochilus loratus</i>                   | Mengla    | 1000 | 19.20 | 1514.70 | 84.25 | 1146.68 | 0.76 | Epiphyte    | Forest edge  | Non-endemic |
| <i>Staurochilus loratus</i>                   | Menghai   | 1420 | 17.04 | 1314.38 | 80.83 | 1150.91 | 0.88 | Epiphyte    | Dense forest | Non-endemic |
| <i>Stereosandra javanica</i>                  | Menghai   | 1200 | 18.36 | 1314.38 | 80.83 | 1150.91 | 0.88 | Saprophyte  | Dense forest | Non-endemic |
| <i>Sunipia andersonii</i>                     | Mengla    | 1200 | 18.00 | 1514.70 | 84.25 | 1146.68 | 0.76 | Epiphyte    | Dense forest | Non-endemic |
| <i>Sunipia andersonii</i>                     | Menghai   | 1500 | 16.56 | 1314.38 | 80.83 | 1150.91 | 0.88 | Epiphyte    | Dense forest | Non-endemic |
| <i>Sunipia andersonii</i>                     | Fugong    | 1600 | 14.46 | 1441.43 | 79.99 | 906.18  | 0.63 | Epiphyte    | Dense forest | Non-endemic |
| <i>Sunipia bicolor</i>                        | Gongshan  | 1800 | 13.28 | 1738.42 | 78.47 | 860.43  | 0.50 | Epiphyte    | Dense forest | Non-endemic |
| <i>Sunipia bicolor</i>                        | Gongshan  | 1900 | 12.68 | 1738.42 | 78.47 | 860.43  | 0.50 | Epiphyte    | Dense forest | Non-endemic |
| <i>Sunipia bicolor</i>                        | Pingbian  | 1900 | 13.42 | 1648.57 | 86.34 | 990.16  | 0.60 | Epiphyte    | Dense forest | Non-endemic |
| <i>Sunipia bicolor</i>                        | Gongshan  | 2080 | 11.60 | 1738.42 | 78.47 | 860.43  | 0.50 | Epiphyte    | Dense forest | Non-endemic |
| <i>Sunipia bicolor</i>                        | Gongshan  | 2100 | 11.48 | 1738.42 | 78.47 | 860.43  | 0.50 | Epiphyte    | Dense forest | Non-endemic |
| <i>Sunipia bicolor</i>                        | Luchun    | 2100 | 14.10 | 2013.54 | 78.64 | 1151.56 | 0.57 | Epiphyte    | Forest edge  | Non-endemic |
| <i>Sunipia bicolor</i>                        | Jingdong  | 2200 | 12.38 | 1128.40 | 76.80 | 1142.11 | 1.01 | Epiphyte    | Dense forest | Non-endemic |
| <i>Sunipia bicolor</i>                        | Zhenkang  | 2300 | 11.04 | 1602.96 | 81.14 | 1089.09 | 0.68 | Epiphyte    | Dense forest | Non-endemic |
| <i>Sunipia bicolor</i>                        | Jingdong  | 2400 | 11.18 | 1128.40 | 76.80 | 1142.11 | 1.01 | Epiphyte    | Dense forest | Non-endemic |
| <i>Sunipia bicolor</i>                        | Jingdong  | 2400 | 11.18 | 1128.40 | 76.80 | 1142.11 | 1.01 | Epiphyte    | Dense forest | Non-endemic |
| <i>Sunipia bicolor</i>                        | Yongde    | 2400 | 12.73 | 1266.25 | 69.00 | 1283.63 | 1.01 | Epiphyte    | Dense forest | Non-endemic |
| <i>Sunipia bicolor</i>                        | Jingdong  | 2400 | 11.18 | 1128.40 | 76.80 | 1142.11 | 1.01 | Epiphyte    | Shrubland    | Non-endemic |
| <i>Sunipia bicolor</i>                        | Jingdong  | 2400 | 11.18 | 1128.40 | 76.80 | 1142.11 | 1.01 | Epiphyte    | Shrubland    | Non-endemic |
| <i>Sunipia bicolor</i>                        | Jingdong  | 2500 | 10.58 | 1128.40 | 76.80 | 1142.11 | 1.01 | Epiphyte    | Dense forest | Non-endemic |
| <i>Sunipia bicolor</i>                        | Jingdong  | 2800 | 8.78  | 1128.40 | 76.80 | 1142.11 | 1.01 | Epiphyte    | Grassy slope | Non-endemic |
| <i>Sunipia candida</i>                        | Luchun    | 1700 | 16.50 | 2013.54 | 78.64 | 1151.56 | 0.57 | Epiphyte    | Dense forest | Non-endemic |
| <i>Sunipia candida</i>                        | Gongshan  | 1900 | 12.68 | 1738.42 | 78.47 | 860.43  | 0.50 | Epiphyte    | Dense forest | Non-endemic |
| <i>Sunipia candida</i>                        | Yongde    | 2000 | 15.13 | 1266.25 | 69.00 | 1283.63 | 1.01 | Epiphyte    | Dense forest | Non-endemic |
| <i>Sunipia candida</i>                        | Gongshan  | 2000 | 12.08 | 1738.42 | 78.47 | 860.43  | 0.50 | Epiphyte    | Dense forest | Non-endemic |
| <i>Sunipia candida</i>                        | Jingdong  | 2000 | 13.58 | 1128.40 | 76.80 | 1142.11 | 1.01 | Epiphyte    | Dense forest | Non-endemic |
| <i>Sunipia candida</i>                        | Gongshan  | 2030 | 11.90 | 1738.42 | 78.47 | 860.43  | 0.50 | Epiphyte    | Dense forest | Non-endemic |
| <i>Sunipia candida</i>                        | Gongshan  | 2100 | 11.48 | 1738.42 | 78.47 | 860.43  | 0.50 | Epiphyte    | Dense forest | Non-endemic |
| <i>Sunipia candida</i>                        | Gongshan  | 2100 | 11.48 | 1738.42 | 78.47 | 860.43  | 0.50 | Epiphyte    | Dense forest | Non-endemic |

|                                  |           |      |       |         |       |         |      |             |               |             |
|----------------------------------|-----------|------|-------|---------|-------|---------|------|-------------|---------------|-------------|
| <i>Sunipia candida</i>           | Zhongdian | 2100 | 12.84 | 641.73  | 69.05 | 914.89  | 1.43 | Epiphyte    | Dense forest  | Non-endemic |
| <i>Sunipia candida</i>           | Longling  | 2400 | 9.72  | 2098.66 | 84.65 | 973.45  | 0.46 | Epiphyte    | Dense forest  | Non-endemic |
| <i>Sunipia candida</i>           | Gengma    | 2500 | 13.07 | 1327.70 | 77.28 | 1181.78 | 0.89 | Epiphyte    | Dense forest  | Non-endemic |
| <i>Sunipia candida</i>           | Gongshan  | 2900 | 6.68  | 1738.42 | 78.47 | 860.43  | 0.50 | Epiphyte    | Dense forest  | Non-endemic |
| <i>Sunipia candida</i>           | Jingdong  | 2900 | 8.18  | 1128.40 | 76.80 | 1142.11 | 1.01 | Epiphyte    | Dense forest  | Non-endemic |
| <i>Sunipia intermedia</i>        | Jingdong  | 2103 | 12.97 | 1128.40 | 76.80 | 1142.11 | 1.01 | Epiphyte    | Dense forest  | Non-endemic |
| <i>Sunipia rimannii</i>          | Hekou     | 1600 | 14.15 | 1768.58 | 84.25 | 1166.26 | 0.66 | Epiphyte    | Forest edge   | Non-endemic |
| <i>Sunipia scariosa</i>          | Mengla    | 620  | 21.48 | 1514.70 | 84.25 | 1146.68 | 0.76 | Epiphyte    | Dense forest  | Non-endemic |
| <i>Sunipia scariosa</i>          | Mengla    | 1050 | 18.90 | 1514.70 | 84.25 | 1146.68 | 0.76 | Epiphyte    | Dense forest  | Non-endemic |
| <i>Sunipia scariosa</i>          | Menghai   | 1600 | 15.96 | 1314.38 | 80.83 | 1150.91 | 0.88 | Epiphyte    | Dense forest  | Non-endemic |
| <i>Sunipia soidaoensis</i>       | Jingdong  | 1950 | 13.88 | 1128.40 | 76.80 | 1142.11 | 1.01 | Epiphyte    | Dense forest  | Non-endemic |
| <i>Sunipia thailandica</i>       | Menghai   | 1400 | 17.16 | 1314.38 | 80.83 | 1150.91 | 0.88 | Epiphyte    | Dense forest  | Non-endemic |
| <i>Taeniophyllum glandulosum</i> | Jinghong  | 800  | 20.92 | 1161.08 | 80.46 | 1256.19 | 1.08 | Epiphyte    | Forest edge   | Non-endemic |
| <i>Taeniophyllum obtusum</i>     | Gongshan  | 1770 | 13.46 | 1738.42 | 78.47 | 860.43  | 0.50 | Epiphyte    | Dense forest  | Non-endemic |
| <i>Tainia angustifolia</i>       | Jinghong  | 1050 | 19.42 | 1161.08 | 80.46 | 1256.19 | 1.08 | Terrestrial | Dense forest  | Non-endemic |
| <i>Tainia dunnii</i>             | Mengla    | 700  | 21.00 | 1514.70 | 84.25 | 1146.68 | 0.76 | Epiphyte    | Dense forest  | Non-endemic |
| <i>Tainia dunnii</i>             | Menghai   | 1150 | 18.66 | 1314.38 | 80.83 | 1150.91 | 0.88 | Epiphyte    | Dense forest  | Non-endemic |
| <i>Tainia latifolia</i>          | Mengla    | 820  | 20.28 | 1514.70 | 84.25 | 1146.68 | 0.76 | Terrestrial | Dense forest  | Non-endemic |
| <i>Tainia latifolia</i>          | Jinghong  | 1050 | 19.42 | 1161.08 | 80.46 | 1256.19 | 1.08 | Terrestrial | Dense forest  | Non-endemic |
| <i>Tainia latifolia</i>          | Menghai   | 1300 | 17.76 | 1314.38 | 80.83 | 1150.91 | 0.88 | Terrestrial | Sparse forest | Non-endemic |
| <i>Tainia latifolia</i>          | Lushui    | 1400 | 17.65 | 1195.57 | 70.63 | 911.65  | 0.76 | Terrestrial | Dense forest  | Non-endemic |
| <i>Tainia latifolia</i>          | Yongde    | 1700 | 16.93 | 1266.25 | 69.00 | 1283.63 | 1.01 | Terrestrial | Dense forest  | Non-endemic |
| <i>Tainia latifolia</i>          | Yongde    | 2900 | 9.73  | 1266.25 | 69.00 | 1283.63 | 1.01 | Terrestrial | Grassy slope  | Non-endemic |
| <i>Tainia latifolia</i>          | Yongde    | 2950 | 9.43  | 1266.25 | 69.00 | 1283.63 | 1.01 | Terrestrial | Dense forest  | Non-endemic |
| <i>Tainia minor</i>              | Mengla    | 1100 | 18.60 | 1514.70 | 84.25 | 1146.68 | 0.76 | Terrestrial | Dense forest  | Non-endemic |
| <i>Tainia minor</i>              | Gongshan  | 1480 | 15.20 | 1738.42 | 78.47 | 860.43  | 0.50 | Terrestrial | Dense forest  | Non-endemic |
| <i>Tainia minor</i>              | Gongshan  | 1700 | 13.88 | 1738.42 | 78.47 | 860.43  | 0.50 | Terrestrial | Dense forest  | Non-endemic |
| <i>Tainia minor</i>              | Wenshan   | 1900 | 14.26 | 988.87  | 76.70 | 1272.98 | 1.29 | Terrestrial | Dense forest  | Non-endemic |
| <i>Tainia minor</i>              | Tengchong | 1900 | 13.60 | 1501.45 | 78.06 | 857.93  | 0.57 | Terrestrial | Dense forest  | Non-endemic |
| <i>Tainia minor</i>              | Jinping   | 1920 | 13.97 | 2305.17 | 83.81 | 1030.46 | 0.45 | Terrestrial | Forest edge   | Non-endemic |
| <i>Tainia minor</i>              | Fugong    | 2400 | 9.66  | 1441.43 | 79.99 | 906.18  | 0.63 | Terrestrial | Dense forest  | Non-endemic |
| <i>Tainia ovifolia</i>           | Mengla    | 1150 | 18.30 | 1514.70 | 84.25 | 1146.68 | 0.76 | Terrestrial | Dense forest  | Endemic     |
| <i>Tainia viridifusca</i>        | Yingjiang | 1350 | 16.29 | 1505.33 | 79.98 | 1158.19 | 0.77 | Terrestrial | Dense forest  | Non-endemic |
| <i>Thelasis pygmaea</i>          | Mengla    | 720  | 20.88 | 1514.70 | 84.25 | 1146.68 | 0.76 | Epiphyte    | Dense forest  | Non-endemic |
| <i>Thelasis pygmaea</i>          | Mengla    | 850  | 20.10 | 1514.70 | 84.25 | 1146.68 | 0.76 | Epiphyte    | Dense forest  | Non-endemic |
| <i>Thelasis pygmaea</i>          | Menglian  | 1000 | 19.58 | 1357.68 | 80.47 | 1185.94 | 0.87 | Epiphyte    | Dense forest  | Non-endemic |

|                                   |           |      |       |         |       |         |      |             |               |             |
|-----------------------------------|-----------|------|-------|---------|-------|---------|------|-------------|---------------|-------------|
| <i>Thelasis pygmaea</i>           | Jinghong  | 1100 | 19.12 | 1161.08 | 80.46 | 1256.19 | 1.08 | Epiphyte    | Shrubland     | Non-endemic |
| <i>Thelasis pygmaea</i>           | Menghai   | 2000 | 13.56 | 1314.38 | 80.83 | 1150.91 | 0.88 | Epiphyte    | Sparse forest | Non-endemic |
| <i>Thrixspermum centipeda</i>     | Hekou     | 106  | 23.09 | 1768.58 | 84.25 | 1166.26 | 0.66 | Epiphyte    | Sparse forest | Non-endemic |
| <i>Thrixspermum centipeda</i>     | Hekou     | 260  | 22.19 | 1768.58 | 84.25 | 1166.26 | 0.66 | Epiphyte    | Dense forest  | Non-endemic |
| <i>Thrixspermum centipeda</i>     | Hekou     | 330  | 21.77 | 1768.58 | 84.25 | 1166.26 | 0.66 | Epiphyte    | Dense forest  | Non-endemic |
| <i>Thrixspermum centipeda</i>     | Hekou     | 410  | 21.29 | 1768.58 | 84.25 | 1166.26 | 0.66 | Epiphyte    | Dense forest  | Non-endemic |
| <i>Thrixspermum centipeda</i>     | Mengla    | 500  | 22.20 | 1514.70 | 84.25 | 1146.68 | 0.76 | Epiphyte    | Dense forest  | Non-endemic |
| <i>Thrixspermum centipeda</i>     | Mengla    | 560  | 21.84 | 1514.70 | 84.25 | 1146.68 | 0.76 | Epiphyte    | Dense forest  | Non-endemic |
| <i>Thrixspermum centipeda</i>     | Mengla    | 600  | 21.60 | 1514.70 | 84.25 | 1146.68 | 0.76 | Epiphyte    | Sparse forest | Non-endemic |
| <i>Thrixspermum centipeda</i>     | Jinghong  | 620  | 22.00 | 1161.08 | 80.46 | 1256.19 | 1.08 | Epiphyte    | Dense forest  | Non-endemic |
| <i>Thrixspermum centipeda</i>     | Mengla    | 700  | 21.00 | 1514.70 | 84.25 | 1146.68 | 0.76 | Epiphyte    | Sparse forest | Non-endemic |
| <i>Thrixspermum centipeda</i>     | Funing    | 750  | 19.12 | 1161.58 | 79.07 | 1147.17 | 0.99 | Epiphyte    | Sparse forest | Non-endemic |
| <i>Thrixspermum centipeda</i>     | Funing    | 750  | 19.12 | 1161.58 | 79.07 | 1147.17 | 0.99 | Epiphyte    | Sparse forest | Non-endemic |
| <i>Thrixspermum centipeda</i>     | Jinghong  | 950  | 20.02 | 1161.08 | 80.46 | 1256.19 | 1.08 | Epiphyte    | Dense forest  | Non-endemic |
| <i>Thrixspermum centipeda</i>     | Mengla    | 1000 | 19.20 | 1514.70 | 84.25 | 1146.68 | 0.76 | Epiphyte    | Dense forest  | Non-endemic |
| <i>Thrixspermum centipeda</i>     | Menghai   | 1100 | 18.96 | 1314.38 | 80.83 | 1150.91 | 0.88 | Epiphyte    | Dense forest  | Non-endemic |
| <i>Thrixspermum centipeda</i>     | Menghai   | 1200 | 18.36 | 1314.38 | 80.83 | 1150.91 | 0.88 | Epiphyte    | Dense forest  | Non-endemic |
| <i>Thrixspermum centipeda</i>     | Jinghong  | 1300 | 17.92 | 1161.08 | 80.46 | 1256.19 | 1.08 | Epiphyte    | Dense forest  | Non-endemic |
| <i>Thrixspermum centipeda</i>     | Xichou    | 1300 | 17.13 | 1267.54 | 82.98 | 985.97  | 0.78 | Epiphyte    | Dense forest  | Non-endemic |
| <i>Thrixspermum japonicum</i>     | Mengla    | 900  | 19.80 | 1514.70 | 84.25 | 1146.68 | 0.76 | Epiphyte    | Dense forest  | Non-endemic |
| <i>Thrixspermum saruwatarii</i>   | Gongshan  | 1700 | 13.88 | 1738.42 | 78.47 | 860.43  | 0.50 | Epiphyte    | Dense forest  | Non-endemic |
| <i>Thrixspermum trichoglottis</i> | Mengla    | 700  | 21.00 | 1514.70 | 84.25 | 1146.68 | 0.76 | Epiphyte    | Dense forest  | Non-endemic |
| <i>Thrixspermum trichoglottis</i> | Mengla    | 800  | 20.40 | 1514.70 | 84.25 | 1146.68 | 0.76 | Epiphyte    | Dense forest  | Non-endemic |
| <i>Thrixspermum tsii</i>          | Xichou    | 1300 | 17.13 | 1267.54 | 82.98 | 985.97  | 0.78 | Epiphyte    | Dense forest  | Endemic     |
| <i>Thunia alba</i>                | Xichou    | 1280 | 17.25 | 1267.54 | 82.98 | 985.97  | 0.78 | Epiphyte    | Shrubland     | Non-endemic |
| <i>Thunia alba</i>                | Xinping   | 1500 | 17.40 | 957.31  | 74.08 | 1291.86 | 1.35 | Epiphyte    | Dense forest  | Non-endemic |
| <i>Thunia alba</i>                | Jingdong  | 1700 | 15.38 | 1128.40 | 76.80 | 1142.11 | 1.01 | Epiphyte    | Shrubland     | Non-endemic |
| <i>Thunia alba</i>                | Jingdong  | 1900 | 14.18 | 1128.40 | 76.80 | 1142.11 | 1.01 | Epiphyte    | Dense forest  | Non-endemic |
| <i>Thunia alba</i>                | Jingdong  | 2000 | 13.58 | 1128.40 | 76.80 | 1142.11 | 1.01 | Epiphyte    | Dense forest  | Non-endemic |
| <i>Thunia alba</i>                | Fengqing  | 2280 | 12.52 | 1352.80 | 73.24 | 1172.52 | 0.87 | Epiphyte    | Shrubland     | Non-endemic |
| <i>Tipularia szechuanica</i>      | Gongshan  | 2534 | 8.88  | 1738.42 | 78.47 | 860.43  | 0.50 | Terrestrial | Dense forest  | Non-endemic |
| <i>Tipularia szechuanica</i>      | Zhongdian | 3850 | 2.34  | 641.73  | 69.05 | 914.89  | 1.43 | Terrestrial | Dense forest  | Non-endemic |
| <i>Tipularia szechuanica</i>      | Zhongdian | 3900 | 2.04  | 641.73  | 69.05 | 914.89  | 1.43 | Terrestrial | Dense forest  | Non-endemic |
| <i>Tipularia szechuanica</i>      | Zhongdian | 4000 | 1.44  | 641.73  | 69.05 | 914.89  | 1.43 | Terrestrial | Dense forest  | Non-endemic |
| <i>Trichoglottis triflora</i>     | Menghai   | 1180 | 18.48 | 1314.38 | 80.83 | 1150.91 | 0.88 | Epiphyte    | Dense forest  | Non-endemic |
| <i>Tropidia angulosa</i>          | Luquan    | 800  | 20.92 | 965.09  | 73.60 | 1160.89 | 1.20 | Terrestrial | Dense forest  | Non-endemic |

|                               |           |      |       |         |       |         |      |             |               |             |
|-------------------------------|-----------|------|-------|---------|-------|---------|------|-------------|---------------|-------------|
| <i>Tropidia angulosa</i>      | Mengla    | 850  | 20.10 | 1514.70 | 84.25 | 1146.68 | 0.76 | Terrestrial | Dense forest  | Non-endemic |
| <i>Tropidia angulosa</i>      | Jinghong  | 1200 | 18.52 | 1161.08 | 80.46 | 1256.19 | 1.08 | Terrestrial | Dense forest  | Non-endemic |
| <i>Tropidia angulosa</i>      | Pingbian  | 1900 | 13.42 | 1648.57 | 86.34 | 990.16  | 0.60 | Terrestrial | Dense forest  | Non-endemic |
| <i>Tropidia angulosa</i>      | Yingjiang | 2100 | 11.79 | 1505.33 | 79.98 | 1158.19 | 0.77 | Terrestrial | Dense forest  | Non-endemic |
| <i>Tropidia curculigoides</i> | Gengma    | 510  | 10.67 | 1327.70 | 77.28 | 1181.78 | 0.89 | Terrestrial | Dense forest  | Non-endemic |
| <i>Tropidia curculigoides</i> | Mengla    | 600  | 21.60 | 1514.70 | 84.25 | 1146.68 | 0.76 | Terrestrial | Dense forest  | Non-endemic |
| <i>Tropidia curculigoides</i> | Jinghong  | 800  | 20.92 | 1161.08 | 80.46 | 1256.19 | 1.08 | Terrestrial | Dense forest  | Non-endemic |
| <i>Tropidia curculigoides</i> | Jinghong  | 800  | 20.92 | 1161.08 | 80.46 | 1256.19 | 1.08 | Terrestrial | Shrubland     | Non-endemic |
| <i>Tropidia curculigoides</i> | Cangyuan  | 820  | 20.30 | 1733.34 | 81.63 | 1060.82 | 0.61 | Terrestrial | Dense forest  | Non-endemic |
| <i>Tropidia curculigoides</i> | Jinghong  | 840  | 20.68 | 1161.08 | 80.46 | 1256.19 | 1.08 | Terrestrial | Dense forest  | Non-endemic |
| <i>Tropidia nipponica</i>     | Pingbian  | 1900 | 13.42 | 1648.57 | 86.34 | 990.16  | 0.60 | Terrestrial | Dense forest  | Non-endemic |
| <i>Tulotis fuscescens</i>     | Pingbian  | 1700 | 14.62 | 1648.57 | 86.34 | 990.16  | 0.60 | Terrestrial | Dense forest  | Non-endemic |
| <i>Uncifera acuminata</i>     | Xichou    | 1300 | 17.13 | 1267.54 | 82.98 | 985.97  | 0.78 | Epiphyte    | Dense forest  | Non-endemic |
| <i>Uncifera acuminata</i>     | Xichou    | 1300 | 17.13 | 1267.54 | 82.98 | 985.97  | 0.78 | Epiphyte    | Dense forest  | Non-endemic |
| <i>Uncifera acuminata</i>     | Pingbian  | 1200 | 17.62 | 1648.57 | 86.34 | 990.16  | 0.60 | Epiphyte    | Sparse forest | Non-endemic |
| <i>Uncifera acuminata</i>     | Pingbian  | 1800 | 14.02 | 1648.57 | 86.34 | 990.16  | 0.60 | Epiphyte    | Dense forest  | Non-endemic |
| <i>Uncifera acuminata</i>     | Wenshan   | 2250 | 12.16 | 988.87  | 76.70 | 1272.98 | 1.29 | Epiphyte    | Dense forest  | Non-endemic |
| <i>Vanda brunnea</i>          | Mengla    | 800  | 20.40 | 1514.70 | 84.25 | 1146.68 | 0.76 | Epiphyte    | Forest edge   | Non-endemic |
| <i>Vanda brunnea</i>          | Menghai   | 1350 | 17.46 | 1314.38 | 80.83 | 1150.91 | 0.88 | Epiphyte    | Dense forest  | Non-endemic |
| <i>Vanda brunnea</i>          | Luxi      | 1600 | 15.48 | 1650.33 | 79.33 | 1183.39 | 0.72 | Epiphyte    | Dense forest  | Non-endemic |
| <i>Vanda brunnea</i>          | Zhenkang  | 1640 | 15.00 | 1602.96 | 81.14 | 1089.09 | 0.68 | Epiphyte    | Dense forest  | Non-endemic |
| <i>Vanda brunnea</i>          | Luxi      | 1650 | 15.18 | 1650.33 | 79.33 | 1183.39 | 0.72 | Epiphyte    | Dense forest  | Non-endemic |
| <i>Vanda brunnea</i>          | Xinping   | 1950 | 14.70 | 957.31  | 74.08 | 1291.86 | 1.35 | Epiphyte    | Dense forest  | Non-endemic |
| <i>Vanda coerulea</i>         | Mengla    | 900  | 19.80 | 1514.70 | 84.25 | 1146.68 | 0.76 | Epiphyte    | Dense forest  | Non-endemic |
| <i>Vanda coerulea</i>         | Menghai   | 1150 | 18.66 | 1314.38 | 80.83 | 1150.91 | 0.88 | Epiphyte    | Forest edge   | Non-endemic |
| <i>Vanda coerulea</i>         | Jinghong  | 1600 | 16.12 | 1161.08 | 80.46 | 1256.19 | 1.08 | Epiphyte    | Dense forest  | Non-endemic |
| <i>Vanda coerulescens</i>     | Yuanyang  | 300  | 24.51 | 1100.28 | 77.18 | 1242.17 | 1.13 | Epiphyte    | Dense forest  | Non-endemic |
| <i>Vanda coerulescens</i>     | Jinghong  | 530  | 22.54 | 1161.08 | 80.46 | 1256.19 | 1.08 | Epiphyte    | Dense forest  | Non-endemic |
| <i>Vanda coerulescens</i>     | Jinghong  | 850  | 20.62 | 1161.08 | 80.46 | 1256.19 | 1.08 | Epiphyte    | Dense forest  | Non-endemic |
| <i>Vanda coerulescens</i>     | Jinghong  | 890  | 20.38 | 1161.08 | 80.46 | 1256.19 | 1.08 | Epiphyte    | Dense forest  | Non-endemic |
| <i>Vanda coerulescens</i>     | Yongde    | 1000 | 21.13 | 1266.25 | 69.00 | 1283.63 | 1.01 | Epiphyte    | Dense forest  | Non-endemic |
| <i>Vanda coerulescens</i>     | Yongde    | 1000 | 21.13 | 1266.25 | 69.00 | 1283.63 | 1.01 | Epiphyte    | Dense forest  | Non-endemic |
| <i>Vanda coerulescens</i>     | Lancang   | 1100 | 19.10 | 1596.50 | 77.88 | 1183.80 | 0.74 | Epiphyte    | Dense forest  | Non-endemic |
| <i>Vanda coerulescens</i>     | Zhenkang  | 1100 | 18.24 | 1602.96 | 81.14 | 1089.09 | 0.68 | Epiphyte    | Dense forest  | Non-endemic |
| <i>Vanda coerulescens</i>     | Jinghong  | 1100 | 19.12 | 1161.08 | 80.46 | 1256.19 | 1.08 | Epiphyte    | Sparse forest | Non-endemic |
| <i>Vanda coerulescens</i>     | Yongde    | 1200 | 19.93 | 1266.25 | 69.00 | 1283.63 | 1.01 | Epiphyte    | Dense forest  | Non-endemic |



|                           |           |      |       |         |       |         |      |             |               |             |
|---------------------------|-----------|------|-------|---------|-------|---------|------|-------------|---------------|-------------|
| <i>Vanda coerulescens</i> | Yongde    | 1300 | 19.33 | 1266.25 | 69.00 | 1283.63 | 1.01 | Epiphyte    | Dense forest  | Non-endemic |
| <i>Vanda coerulescens</i> | Lancang   | 1400 | 17.30 | 1596.50 | 77.88 | 1183.80 | 0.74 | Epiphyte    | Dense forest  | Non-endemic |
| <i>Vanda concolor</i>     | Funing    | 900  | 18.22 | 1161.58 | 79.07 | 1147.17 | 0.99 | Epiphyte    | Dense forest  | Non-endemic |
| <i>Vanda concolor</i>     | Xichou    | 1000 | 18.93 | 1267.54 | 82.98 | 985.97  | 0.78 | Epiphyte    | Dense forest  | Non-endemic |
| <i>Vanda concolor</i>     | Malipo    | 1100 | 17.66 | 1063.54 | 85.83 | 1053.97 | 0.99 | Epiphyte    | Dense forest  | Non-endemic |
| <i>Vanda concolor</i>     | Jianshui  | 1430 | 17.97 | 793.10  | 71.73 | 1413.81 | 1.78 | Epiphyte    | Dense forest  | Non-endemic |
| <i>Vanda concolor</i>     | Wenshan   | 1500 | 16.66 | 988.87  | 76.70 | 1272.98 | 1.29 | Epiphyte    | Dense forest  | Non-endemic |
| <i>Vanda concolor</i>     | Lancang   | 1500 | 16.70 | 1596.50 | 77.88 | 1183.80 | 0.74 | Epiphyte    | Shrubland     | Non-endemic |
| <i>Vanda concolor</i>     | Menghai   | 1550 | 16.26 | 1314.38 | 80.83 | 1150.91 | 0.88 | Epiphyte    | Dense forest  | Non-endemic |
| <i>Vanda cristata</i>     | Zhenkang  | 1465 | 16.05 | 1602.96 | 81.14 | 1089.09 | 0.68 | Epiphyte    | Shrubland     | Non-endemic |
| <i>Vanda denisoniana</i>  | Jinghong  | 890  | 20.38 | 1161.08 | 80.46 | 1256.19 | 1.08 | Epiphyte    | Dense forest  | Non-endemic |
| <i>Vanda pumila</i>       | Jinping   | 530  | 22.31 | 2305.17 | 83.81 | 1030.46 | 0.45 | Epiphyte    | Dense forest  | Non-endemic |
| <i>Vanda pumila</i>       | Jinghong  | 1000 | 19.72 | 1161.08 | 80.46 | 1256.19 | 1.08 | Epiphyte    | Dense forest  | Non-endemic |
| <i>Vanda pumila</i>       | Jinghong  | 1100 | 19.12 | 1161.08 | 80.46 | 1256.19 | 1.08 | Epiphyte    | Dense forest  | Non-endemic |
| <i>Vanda pumila</i>       | Menghai   | 1180 | 18.48 | 1314.38 | 80.83 | 1150.91 | 0.88 | Epiphyte    | Dense forest  | Non-endemic |
| <i>Vanda pumila</i>       | Menghai   | 1400 | 17.16 | 1314.38 | 80.83 | 1150.91 | 0.88 | Epiphyte    | Sparse forest | Non-endemic |
| <i>Vanda pumila</i>       | Menghai   | 1530 | 16.38 | 1314.38 | 80.83 | 1150.91 | 0.88 | Epiphyte    | Dense forest  | Non-endemic |
| <i>Vanda pumila</i>       | Jinping   | 1700 | 15.29 | 2305.17 | 83.81 | 1030.46 | 0.45 | Epiphyte    | Dense forest  | Non-endemic |
| <i>Vanda pumila</i>       | Menghai   | 1800 | 14.76 | 1314.38 | 80.83 | 1150.91 | 0.88 | Epiphyte    | Dense forest  | Non-endemic |
| <i>Vanda teres</i>        | Mengla    | 570  | 21.78 | 1514.70 | 84.25 | 1146.68 | 0.76 | Epiphyte    | Dense forest  | Non-endemic |
| <i>Vandopsis gigantea</i> | Jinghong  | 650  | 21.82 | 1161.08 | 80.46 | 1256.19 | 1.08 | Epiphyte    | Dense forest  | Non-endemic |
| <i>Vandopsis gigantea</i> | Jinghong  | 1100 | 19.12 | 1161.08 | 80.46 | 1256.19 | 1.08 | Epiphyte    | Dense forest  | Non-endemic |
| <i>Vandopsis gigantea</i> | Menghai   | 1500 | 16.56 | 1314.38 | 80.83 | 1150.91 | 0.88 | Epiphyte    | Dense forest  | Non-endemic |
| <i>Vandopsis undulata</i> | Jingdong  | 1500 | 16.58 | 1128.40 | 76.80 | 1142.11 | 1.01 | Epiphyte    | Shrubland     | Non-endemic |
| <i>Vandopsis undulata</i> | Jingdong  | 1600 | 15.98 | 1128.40 | 76.80 | 1142.11 | 1.01 | Epiphyte    | Dense forest  | Non-endemic |
| <i>Vandopsis undulata</i> | Tengchong | 1850 | 13.90 | 1501.45 | 78.06 | 857.93  | 0.57 | Epiphyte    | Dense forest  | Non-endemic |
| <i>Vandopsis undulata</i> | Jingdong  | 1900 | 14.18 | 1128.40 | 76.80 | 1142.11 | 1.01 | Epiphyte    | Dense forest  | Non-endemic |
| <i>Vandopsis undulata</i> | Gongshan  | 2000 | 12.08 | 1738.42 | 78.47 | 860.43  | 0.50 | Epiphyte    | Dense forest  | Non-endemic |
| <i>Vandopsis undulata</i> | Jingdong  | 2200 | 12.38 | 1128.40 | 76.80 | 1142.11 | 1.01 | Epiphyte    | Dense forest  | Non-endemic |
| <i>Vandopsis undulata</i> | Gongshan  | 2300 | 10.28 | 1738.42 | 78.47 | 860.43  | 0.50 | Epiphyte    | Dense forest  | Non-endemic |
| <i>Vandopsis undulata</i> | Yongde    | 2300 | 13.33 | 1266.25 | 69.00 | 1283.63 | 1.01 | Epiphyte    | Dense forest  | Non-endemic |
| <i>Vandopsis undulata</i> | Fugong    | 2420 | 9.54  | 1441.43 | 79.99 | 906.18  | 0.63 | Epiphyte    | Dense forest  | Non-endemic |
| <i>Vanilla siamensis</i>  | Jinghong  | 660  | 21.76 | 1161.08 | 80.46 | 1256.19 | 1.08 | Epiphyte    | Dense forest  | Non-endemic |
| <i>Vanilla siamensis</i>  | Menghai   | 850  | 20.46 | 1314.38 | 80.83 | 1150.91 | 0.88 | Epiphyte    | Sparse forest | Non-endemic |
| <i>Vanilla siamensis</i>  | Jinghong  | 1100 | 19.12 | 1161.08 | 80.46 | 1256.19 | 1.08 | Epiphyte    | Dense forest  | Non-endemic |
| <i>Zeuxine affinis</i>    | Jinghong  | 560  | 22.36 | 1161.08 | 80.46 | 1256.19 | 1.08 | Terrestrial | Dense forest  | Non-endemic |

|                             |           |      |       |         |       |         |      |             |              |             |
|-----------------------------|-----------|------|-------|---------|-------|---------|------|-------------|--------------|-------------|
| <i>Zeuxine affinis</i>      | Jinghong  | 580  | 22.24 | 1161.08 | 80.46 | 1256.19 | 1.08 | Terrestrial | Dense forest | Non-endemic |
| <i>Zeuxine affinis</i>      | Mengla    | 700  | 21.00 | 1514.70 | 84.25 | 1146.68 | 0.76 | Terrestrial | Dense forest | Non-endemic |
| <i>Zeuxine affinis</i>      | Jinghong  | 800  | 20.92 | 1161.08 | 80.46 | 1256.19 | 1.08 | Terrestrial | Shrubland    | Non-endemic |
| <i>Zeuxine affinis</i>      | Mengla    | 1150 | 18.30 | 1514.70 | 84.25 | 1146.68 | 0.76 | Terrestrial | Forest edge  | Non-endemic |
| <i>Zeuxine affinis</i>      | Jinghong  | 1180 | 18.64 | 1161.08 | 80.46 | 1256.19 | 1.08 | Terrestrial | Shrubland    | Non-endemic |
| <i>Zeuxine affinis</i>      | Zhenkang  | 1640 | 15.00 | 1602.96 | 81.14 | 1089.09 | 0.68 | Terrestrial | Dense forest | Non-endemic |
| <i>Zeuxine affinis</i>      | Yongde    | 2230 | 13.75 | 1266.25 | 69.00 | 1283.63 | 1.01 | Terrestrial | Forest edge  | Non-endemic |
| <i>Zeuxine Goodyeroides</i> | Xichou    | 1000 | 18.93 | 1267.54 | 82.98 | 985.97  | 0.78 | Terrestrial | Dense forest | Non-endemic |
| <i>Zeuxine Goodyeroides</i> | Wenshan   | 1200 | 18.46 | 988.87  | 76.70 | 1272.98 | 1.29 | Terrestrial | Dense forest | Non-endemic |
| <i>Zeuxine Goodyeroides</i> | Funing    | 1270 | 16.00 | 1161.58 | 79.07 | 1147.17 | 0.99 | Terrestrial | Dense forest | Non-endemic |
| <i>Zeuxine Goodyeroides</i> | Pingbian  | 1400 | 16.42 | 1648.57 | 86.34 | 990.16  | 0.60 | Terrestrial | Dense forest | Non-endemic |
| <i>Zeuxine Goodyeroides</i> | Pingbian  | 1400 | 16.42 | 1648.57 | 86.34 | 990.16  | 0.60 | Terrestrial | Grassy slope | Non-endemic |
| <i>Zeuxine Goodyeroides</i> | Luchun    | 1600 | 17.10 | 2013.54 | 78.64 | 1151.56 | 0.57 | Terrestrial | Dense forest | Non-endemic |
| <i>Zeuxine Goodyeroides</i> | Pingbian  | 1820 | 13.90 | 1648.57 | 86.34 | 990.16  | 0.60 | Terrestrial | Dense forest | Non-endemic |
| <i>Zeuxine Goodyeroides</i> | Luchun    | 2500 | 11.70 | 2013.54 | 78.64 | 1151.56 | 0.57 | Terrestrial | Dense forest | Non-endemic |
| <i>Zeuxine nervosa</i>      | Tengchong | 1200 | 17.80 | 1501.45 | 78.06 | 857.93  | 0.57 | Terrestrial | Dense forest | Non-endemic |
